# Supplementary material for: Elucidating the mitochondrial proteome of Toxoplasma gondii reveals the presence of a divergent cytochrome c oxidase
Source: eLife journal article supplement (doi:10.7554/elife.38131), 2018-09-11
Supplement: supp [file elife-38131-supp-v1.zip]

Archive with 17 entries (17 files):
- elife_poa_e38131_Figure_7_figure_supplement_1.tif
- elife_poa_e38131_Source_code_2.pdf
- elife_poa_e38131_Figure_5_figure_supplement_4.tif
- elife_poa_e38131_Figure_2_figure_supplement_1.tif
- elife_poa_e38131_Supplementary_File_5.xlsx
- elife_poa_e38131_Supplementary_File_2.xlsx
- elife_poa_e38131_Source_code_1.pdf
- elife_poa_e38131_Figure_3_figure_supplement_1.tif
- elife_poa_e38131_Figure_5_figure_supplement_1.tif
- elife_poa_e38131_Supplementary_File_1.xlsx
- elife_poa_e38131_Figure_1_figure_supplement_1.tif
- elife_poa_e38131_Figure_5_figure_supplement_3.tif
- elife_poa_e38131_Supplementary_File_4.xlsx
- elife_poa_e38131_Figure_6_figure_supplement_1.tif
- elife_poa_e38131_Supplementary_File_3.xlsx
- elife_poa_e38131_Figure_5_figure_supplement_2.tif
- elife_poa_e38131_Transparent_Reporting_File.pdf
