# Supplementary material for: Elucidating the mitochondrial proteome of Toxoplasma gondii reveals the presence of a divergent cytochrome c oxidase
Source: eLife journal article supplement (doi:10.7554/elife.38131), 2018-09-11
Supplement: supp [file elife-38131-supp-v1.zip › elife_poa_e38131_Supplementary_File_1.xlsx]

## Sheet: 1. Identified peptides
Leading Razor Protein	ModifiedSequence	Experiment	Charge	m/z	Mass Error [ppm]	PEP	Score	Delta score	Intensity
TGME49_288720	_ESNVATAVTALR_	mitoBirA	2	616.336	0.43677	8.7024e-05	110.58	90.399	2145400000
TGME49_294800	_SVEMHHEVMEQAVPGDNVGFNVK_	mitoAPEX	4	639.052	-0.39156	1.9143e-05	87.208	84.565	2144900000
TGME49_292130	_LQVFEGVPTMVER_	BirA control	2	752.895	0.14197	2.2171e-05	94.717	84.364	2144800000
TGME49_284190	_IGHPPFGFPEPLR_	mitoAPEX	2	732.393	0.16289	4.3652e-05	90.793	82.196	2144400000
TGME49_230410	_HLTVNDLPLGR_	mitoBirA	3	412.235	-0.29683				2144000000
TGME49_220400	_(ac)ASGMGVDENCVAR_	mitoBirA	2	704.303	0.45319	5.9141e-18	184.31	165.18	2140700000
TGME49_248340	_RLTNQPALSFVGEHAK_	mitoAPEX	3	589.988	-0.0050005	2.7896e-07	92.236	83.443	2139400000
TGME49_251780	_MKETAEAYIGRPVK_	mitoAPEX	3	531.62	-0.5449	3.6288e-09	139.3	126.5	2138900000
TGME49_221320	_DPNAGDRIDFINEDYLPIQR_	mitoBirA	3	787.721	-0.045325	1.4651e-83	268.3	237.71	2138400000
TGME49_257730	_AAQFEHTILMTPEGAEVLTKPTL_	mitoBirA	3	833.105	-1.1126	9.2135e-16	133.68	126.76	2134800000
TGME49_221320	_QPVFIYIPPHGELR_	mitoAPEX	3	555.975	0.21622	0.004917	49.216	39.566	2131800000
TGME49_262380	_VEQGTAKPNEAIEIVGGR_	mitoAPEX	3	623.334	0.43622				2131500000
TGME49_284190	_LQVEHTVSEEVTGVDLVK_	mitoAPEX	2	991.526	0.051411	4.243e-38	202.39	193.83	2131100000
TGME49_221320	_LRVDQIEVK_	mitoAPEX	2	550.327	0.50206				2130400000
TGME49_221320	_LQVEHPVSEGVTGVNLPAAQLQVAMGIPLWR_	mitoAPEX	4	828.2	0.10609	1.1205e-60	198.4	196.02	2128500000
TGME49_292920	_TPAVVTGFLSSTLR_	mitoBirA	2	724.909	0.048143	1.0013e-06	119.96	105.95	2127000000
TGME49_230410	_IAPDFTADAVMPNGEIQK_	mitoAPEX	2	958.975	-0.39026	1.0782e-06	105.5	95.655	2125500000
TGME49_245460	_LLGVVYNASNNELVR_	mitoAPEX	2	830.954	-0.16128	4.842e-11	131.35	110.29	2124800000
TGME49_236210	_IILPTEKPFFCGSELLHR_	mitoAPEX	4	540.044	-0.28726	1.3086e-07	106.93	99.693	2124800000
TGME49_313140	_DQTEDKVTLEAAEAIKK_	mitoBirA	4	473.002	-0.55916	1.5522e-05	81.594	75.274	2124400000
TGME49_221320	_IDTSWLDK_	BirA control	1	977.494	0.30165				2123900000
TGME49_249900	_WAVAQTVTAAAGVASYPFDTVR_	mitoAPEX	2	1141.08	0.36481	1.182e-39	179.17	170.83	2123500000
TGME49_221320	_NVCLFALTTPMDFGTEEEKLK_	mitoAPEX	3	815.068	-1.7342	0.0044461	56.882	52.126	2122300000
TGME49_306670	_FQNSIVDNEPDYLGSHPWGVRPK_	mitoBirA	3	885.77	-0.11037	3.2726e-41	177.03	177.03	2119900000
TGME49_248340	_YIPTLGVEVHPLK_	mitoBirA	3	489.285	-1.7268	0.00041444	66.989	54.72	2119600000
TGME49_262640	_LNQISYDHNYDWER_	mitoAPEX	3	618.28	0.063545	8.6377e-07	107.35	97.502	2119200000
TGME49_313140	_TSTNPIASIFAWTR_	mitoBirA	2	782.91	0.35629	4.6495e-13	156.96	145.58	2118000000
TGME49_313140	_TSTNPIASIFAWTR_	mitoBirA	2	782.91	-1.016	1.7657e-08	135.81	125.09	2116100000
TGME49_221320	_LQVEHPVSEGVTGVNLPAAQLQVAMGIPLWR_	APEX control	3	1103.93	-0.76764	2.735e-07	68.461	66.308	2116000000
TGME49_221320	_GGVLEPPGICEIK_	mitoAPEX	2	684.863	-0.1045	0.0095329	46.159	40.433	2115600000
TGME49_257730	_AAQFEHTILMTPEGAEVLTKPTL_	mitoBirA	3	833.105	-0.36126	7.7691e-42	186.62	180.48	2115400000
TGME49_219320	_LAPADATEAAAAENHGYPK_	mitoBirA	3	632.974	0.064057	0.00051769	71.592	58.8	2112500000
TGME49_221320	_DILSSLPESER_	mitoAPEX	2	623.32	0.55654	1.5548e-08	150.09	123.98	2112400000
TGME49_219550	_LKGAQNTAAMLTTFNECDMGALMAMR_	mitoBirA	3	949.442	-0.49849	8.9034e-34	168.55	164.05	2110600000
TGME49_313140	_IHVANPVVEMDGDEMTR_	mitoBirA	2	956.948	0.38275	4.9429e-15	125.45	115.54	2108700000
TGME49_242840	_GVYPPVAGGPVYWALR_	mitoAPEX	2	851.459	-0.076458				2108100000
TGME49_294800	_EHALLAFTLGVK_	mitoBirA	2	649.877	-0.45024	6.156e-10	165.58	149.72	2106600000
TGME49_250770	_LPPDVQVALFSATMPQDILELTTK_	mitoBirA	3	876.472	0.92569	1.2573e-16	138.44	131.72	2105300000
TGME49_284190	_LDGAIGASGAVVQPYYDSLLVK_	mitoAPEX	3	746.067	0.27743	1.1126e-07	106.89	99.795	2103500000
TGME49_220400	_(ac)ASGMGVDENCVAR_	mitoBirA	2	704.303	-0.47355	9.4217e-05	76.868	63.86	2102800000
TGME49_244200	_QTGIVVMLPHGYDGQGPEHSSGR_	mitoBirA	3	808.057	-0.067352	1.9468e-10	109.68	105.27	2101300000
TGME49_221320	_LQVDGTTVLLPNVFDPSELR_	mitoBirA	3	738.399	0.08682	6.1455e-11	123.55	117.44	2098500000
TGME49_219550	_VPEVNAFIEGNEIVYK_	mitoBirA	2	910.975	-0.93238	6.8287e-20	165.66	155	2098500000
TGME49_288500	_INPGTGIIFNITPSPGGTTCLGNAELDMR_	mitoBirA	3	1006.17	-0.56723	2.8409e-45	176.85	168.98	2098500000
TGME49_245460	_NSIVAIDATPFK_	mitoBirA	2	638.351	-0.67742	0.0053025	62.398	52.253	2098100000
TGME49_207170	_NAAVAETETFAGR_	mitoBirA	2	668.828	0.27891	7.3509e-14	135.65	110.18	2096900000
TGME49_312160	_PTQYQTEICNQATNVQPGVEKDPTK_	mitoBirA	3	949.459	-1.0932	1.9657e-16	132.39	128.86	2095600000
TGME49_310360	_ATHALQPTGTGSVAFTRPGQGSNAQFQTSLADK_	mitoBirA	4	836.921	-0.20644	2.4167e-30	149.88	144.63	2095300000
TGME49_247550	_VELEKPFVLLYDKR_	mitoAPEX	4	438.004	-0.034289	2.0263e-06	100.11	92.198	2094600000
TGME49_209260	_AAAFVGPFGTVEKPVLCPSVTTDR_	mitoBirA	2	1260.15	0.20541	5.5855e-06	99.148	99.148	2093600000
TGME49_284190	_QVFDESYLVGR_	mitoBirA	2	656.83	-1.0325	0.00033648	98.754	81.015	2092600000
TGME49_227360	_ITPMGGFPHYGTVNNDFLLLK_	mitoBirA	3	778.737	-0.28353	0.00098647	61.345	55.374	2092500000
TGME49_306650	_VIEEEAQPFAHNQNVQASLK_	mitoBirA	3	751.382	0.14279	1.3038e-10	122.19	108.77	2092100000
TGME49_221320	_EPPEAEGLLGR_	BirA control	2	584.304	0.096348				2092000000
TGME49_284190	_TVNVIDTNASK_	BirA control	2	581.309	-0.11053				2089900000
TGME49_292920	_AELLEHLGTIAK_	mitoBirA	3	432.25	0.11451	0.0012835	61.11	47.026	2089700000
TGME49_221320	_DGGVGGWDEAVPR_	mitoBirA	2	657.807	-0.10696	0.0021892	65.043	59.344	2089500000
TGME49_219550	_EAVTFLCHIR_	mitoAPEX	3	415.885	1.1196	0.0032322	64.841	50.831	2088600000
TGME49_284190	_TVNVIDTNASK_	BirA control	2	581.309	-0.11731	0.0016765	79.492	63.863	2088100000
TGME49_221320	_GGVLEPPGICEIK_	mitoBirA	2	684.863	-1.1988	0.0047176	59.227	34.876	2087200000
TGME49_309820	_VLEQLTGQRPQFSK_	APEX control	3	544.302	-0.99203	1.8568e-06	103.83	87.611	2082300000
TGME49_221320	_VDAVWPGWGHASENPNLPR_	BirA control	2	1051.51	-0.15786	1.0739e-14	135.18	125.04	2081200000
TGME49_232300	_FGFAPDSVELFAER_	BirA control	2	792.888	0.1542	8.8072e-06	97.273	86.92	2080300000
TGME49_243960	_VGSDACASPTVKPAAAEAPELEEK_	mitoBirA	3	809.728	-0.15497	2.5404e-16	137.52	120.37	2079400000
TGME49_294800	_VPFVAISGFVGDNMVEK_	mitoBirA	3	603.647	0.093561	0.00011556	67.646	62.591	2079300000
TGME49_244200	_SVVWAQEEPMNQGAWFYTSK_	mitoBirA	2	1179.55	-0.73756	6.4921e-47	196.4	191.4	2078900000
TGME49_245620	_ETCGAGVFMAAHK_	mitoBirA	2	689.816	-0.44658	4.4818e-05	90.697	74.756	2077600000
TGME49_245620	_ETCGAGVFMAAHK_	mitoAPEX	3	460.213	-0.4828	4.0732e-05	79.492	74.079	2077600000
TGME49_261950	_VVDTGAPIQVPVGVETLGR_	mitoBirA	3	636.358	0.71375	5.7274e-11	123.63	109.44	2075500000
TGME49_244200	_LHDQELAQLLQDALDINR_	mitoBirA	3	702.371	-1.1518				2074000000
TGME49_239100	_IVKPQGVEPTEIENEVAK_	mitoBirA	3	660.693	0.45821				2073500000
TGME49_299070	_GLGDIESVSHTASPGSSVVR_	mitoBirA	3	652.332	0.15622	2.0123e-22	154.26	140.41	2072900000
TGME49_265370	_(ac)MQSAEITALESPAIK_	mitoAPEX	2	815.921	0.0036813	1.8905e-14	141.55	132.02	2071800000
TGME49_236210	_LEVIDAEEVKR_	mitoBirA	3	434.242	0.11415	9.5939e-05	93.345	30.879	2070300000
TGME49_292920	_ETAMASPYMEQFR_	mitoBirA	2	780.845	-0.25054	7.7572e-18	184.1	176.73	2068000000
TGME49_221320	_LRVDQIEVK_	mitoAPEX	3	367.221	0.44476	0.001785	86.136	38.045	2067100000
TGME49_221320	_VSAQGTLYLDPDWR_	BirA control	2	810.904	0.15329				2065800000
TGME49_202680	_EHLVYSAECLR_	mitoBirA	2	688.835	0.0083458				2065100000
TGME49_245460	_NSIVAIDATPFK_	BirA control	2	638.351	-0.90427	1.3433e-07	142.83	119.15	2064600000
TGME49_320220	_GELAAGATVTR_	mitoBirA	2	523.285	-0.27352	0.0085399	64.121	30.202	2063200000
TGME49_221320	_HIEVQIVGDEDGQAVALSGR_	mitoAPEX	3	698.359	-0.10779	2.8918e-39	177	165.36	2062300000
TGME49_306220	_ELFEDAVDNLKEEYQR_	mitoBirA	3	666.653	-0.50687	1.1425e-11	126.77	116.92	2055800000
TGME49_226590	_NIPFWPR_	mitoBirA	2	465.253	0.24274				2054700000
TGME49_284190	_FIDEHNELLFYDPLDMSSQNICK_	mitoBirA	3	943.435	-0.37471	1.8328e-16	138.82	136.61	2053900000
TGME49_297810	_TDLELTEEMVK_	mitoBirA	2	654.324	0.46574	6.6712e-05	122.7	97.846	2051200000
TGME49_236210	_EHILEYINR_	mitoAPEX	2	593.814	0.36312	0.0025281	103.19	88.558	2050100000
TGME49_221320	_EVYASQDQLGGPEVMFR_	BirA control	3	642.64	-0.081107	1.6081e-20	153.48	148.23	2049400000
TGME49_204020	_GAPLAEVSFR_	BirA control	2	523.785	0.18395	0.00018222	126.31	96.238	2048700000
TGME49_209030	_CPEALFQPSFLGK_	mitoAPEX	2	747.376	-0.34214	8.8666e-14	159.66	144.87	2047900000
TGME49_204400	_HCVIIYDDLSK_	mitoAPEX	2	681.84	-0.13798	3.791e-05	130.56	108.79	2047600000
TGME49_286530	_ETDVNPDDWIPPQYR_	mitoBirA	2	922.926	-0.99463	1.1099e-05	88.561	76.919	2046000000
TGME49_221320	_RLIFENEVK_	mitoBirA	2	574.327	-0.29583				2045700000
TGME49_284190	_QVFDESYLVGR_	mitoAPEX	2	656.83	-1.2126	0.0010672	85.813	72.805	2045300000
TGME49_221320	_IAANILAQTAGVPSIPWSGDSLK_	mitoBirA	2	1155.13	-0.59022	1.6154e-31	172.3	159.69	2041400000
TGME49_284190	_LDGAIGASGAVVQPYYDSLLVK_	mitoAPEX	2	1118.6	0.091731	1.3923e-05	92.01	87.759	2040900000
TGME49_289690	_YEDIVAAVK_	mitoAPEX	2	504.274	0.10961				2039600000
TGME49_221320	_EIPVAFWSFR_	mitoAPEX	2	626.33	0.14874	0.0003048	104.22	81.58	2038900000
TGME49_250770	_SQIYDVFK_	mitoBirA	2	500.261	0.19335				2036400000
TGME49_221320	_IAANILAQTAGVPSIPWSGDSLK_	mitoBirA	2	1155.13	0.21499	1.475e-30	163.4	163.4	2036200000
TGME49_221320	_LFLHIVSPLNLASAK_	BirA control	2	811.985	0.42025	1.9728e-07	103.88	98.256	2035600000
TGME49_221320	_NGVSHLVVQNDQEGMK_	BirA control	3	585.621	-0.023965	5.9659e-11	123.63	108.43	2034900000
TGME49_262670	_STGEILAVNEIR_	mitoBirA	2	651.357	0.21576	7.3326e-08	149.41	103.06	2033500000
TGME49_223390	_VNTIELFNR_	mitoBirA	2	553.304	0.19501				2031100000
TGME49_313140	_DIFQSYYDEQFKPLFEK_	mitoAPEX	3	733.021	-0.036912				2030400000
TGME49_261950	_IMNVIGEPVDECGPVPAK_	mitoAPEX	2	962.979	-0.43627	4.4393e-06	95.954	74.64	2030200000
TGME49_221320	_MFNFLASDGFDESR_	mitoAPEX	2	818.359	-0.24807	2.9521e-11	141.54	130.89	2029700000
TGME49_263700	_IEDVTPIPTDSTR_	mitoAPEX	2	722.37	0.0022498				2029100000
TGME49_221320	_EPPEAEGLLGR_	mitoBirA	2	584.304	0.32855	0.00043308	92.611	40.032	2029100000
TGME49_312160	_PRPTQYQTEICNQATNVQPGVEK_	mitoBirA	3	886.77	-1.166	4.7936e-66	209.41	199.65	2028800000
TGME49_221320	_NNYANVDLICQIAVQEK_	APEX control	2	996.496	-0.97013	2.2619e-51	231.06	223.42	2028300000
TGME49_294800	_GCATFLAQVIVLNHPGEIK_	BirA control	3	689.707	-0.30936	8.0986e-05	85.203	83.693	2028100000
TGME49_270510	_DAAAAAAEPLIPLTK_	mitoBirA	2	726.409	-0.18745	5.2868e-11	130.47	121.19	2026300000
TGME49_203220	_PLLDVSSLISPLVLVATDVAAR_	mitoBirA	3	750.442	-0.19295				2026000000
TGME49_251780	_QAVTNPENTVFATK_	mitoBirA	2	760.391	-0.069424				2026000000
TGME49_261950	_VVDTGAPIQVPVGVETLGR_	mitoBirA	3	636.358	-0.43126	1.2028e-06	100.02	89.648	2025200000
TGME49_221320	_IKVEWNDASNPSLGFK_	BirA control	3	602.312	-0.5666	2.0761e-05	76.158	69.838	2024100000
TGME49_263300	_SKNPEIVNTASVSPAGAFDASSK_	BirA control	3	759.717	0.26087	1.9503e-10	114.57	91.499	2023500000
TGME49_284190	_QIASPMPGNVLK_	mitoAPEX	2	627.847	-1.4227	0.0049606	63.473	48.373	2023100000
TGME49_248340	_RLTNQPALSFVGEHAK_	BirA control	3	589.988	0.2769	1.5581e-07	94.61	82.692	2021500000
TGME49_251780	_ARGDVVGIDLGTTNSCVAVMEGSQPK_	mitoAPEX	3	887.771	-0.40387	2.6057e-11	110.78	103.2	2018900000
TGME49_278990	_TFMGMGTTGGGSAK_	mitoAPEX	2	651.794	-0.61949	2.8775e-06	110.44	100.43	2018600000
TGME49_244200	_ALDAPVFHVNADDPEAVTFVSELALEYR_	mitoBirA	3	1030.18	0.090679	1.4164e-34	170.1	157.88	2018400000
TGME49_221320	_FIGVENLR_	mitoAPEX	2	474.269	0.007337				2017500000
TGME49_261950	_EGNDLYHEMMTTGVIK_	mitoAPEX	3	613.287	-0.36592	1.0095e-05	80.738	71.456	2016500000
TGME49_288720	_ESNVATAVTALR_	mitoBirA	2	616.336	-0.23401				2016500000
TGME49_250770	_LPPDVQVALFSATMPQDILELTTK_	mitoBirA	3	876.472	0.85586				2014500000
TGME49_209260	_AAAFVGPFGTVEKPVLCPSVTTDR_	mitoBirA	2	1260.15	0.089147	1.2519e-14	130.16	122.75	2013200000
TGME49_306650	_VIEEEAQPFAHNQNVQASLK_	mitoAPEX	3	751.382	0.10607	3.745e-10	117.37	108.71	2012100000
TGME49_206470	_LDAGHIILATGSEASPLPGNVVPIDEK_	mitoBirA	3	905.152	-0.075419	5.5609e-13	114.62	110.55	2012100000
TGME49_270510	_DAAAAAAEPLIPLTK_	mitoBirA	2	726.409	0.11267	3.1042e-11	134.81	129.43	2011600000
TGME49_242840	_VYDMNWDISK_	mitoBirA	2	635.792	-0.21237	0.00041163	97.813	91.377	2010100000
TGME49_313140	_LIDDMVAQALK_	mitoAPEX	2	608.834	-1.3514	0.0069301	67.08	50.409	2008700000
TGME49_221320	_EVYASQDQLGGPEVMFR_	mitoBirA	2	963.457	0.6	2.2461e-37	195.46	173.4	2006100000
TGME49_221320	_GFPIDALHTELFEVETQDGSKK_	BirA control	4	616.062	0.04605	0.00039515	66.845	64.49	2005500000
TGME49_268830	_DILNCLK_	mitoBirA	2	438.236	1.0448				2003100000
TGME49_284190	_VVGDFAQFLVQNK_	BirA control	3	488.933	0.17364	3.4889e-06	100.93	92.799	2002700000
TGME49_288720	_ESNVATAVTALR_	BirA control	2	616.336	0.14697	3.4755e-05	119.39	88.496	2001600000
TGME49_286530	_ETDVNPDDWIPPQYR_	mitoBirA	2	922.926	0.12136	1.0135e-23	175.15	157.9	2001000000
TGME49_221320	_VGDGEGDPLADYVR_	mitoBirA	2	731.844	0.0034751	3.0807e-08	131.96	114.84	2000400000
TGME49_247770	_GSGLHGPENGEFFR_	mitoBirA	3	501.904	-1.1743	2.2302e-18	173.59	156.38	1998300000
TGME49_288380	_AELVNNLGTIAR_	mitoBirA	2	635.859	-1.2393				1998000000
TGME49_284190	_TAAIPPPLPSSVER_	BirA control	2	717.901	-1.0687	1.0535e-05	93.766	74.012	1997900000
TGME49_202680	_EHLVYSAECLR_	mitoAPEX	3	459.559	-0.21836	1.2682e-05	123.96	101.38	1997700000
TGME49_292920	_GDTMPTGVAEDDKAQPDSSSAQTDSTAGSEVEPR_	mitoBirA	3	1146.17	0.08877	3.2161e-28	138.84	136.99	1997500000
TGME49_288750	_ITANSPVQYVPSPPTK_	mitoBirA	2	849.957	-0.83045	6.6937e-07	94.922	78.657	1995500000
TGME49_221320	_LQVEHPVSEGVTGVNLPAAQLQVAMGIPLWR_	mitoBirA	3	1103.93	-0.16656				1992700000
TGME49_244200	_LHDQELAQLLQDALDINR_	mitoBirA	3	702.371	-0.063613				1992300000
TGME49_284190	_VFDSLNFVENLK_	mitoBirA	2	712.875	0.29825	2.6201e-12	179.67	144.97	1992100000
TGME49_221320	_AHVVLAAVLFR_	BirA control	3	399.249	0.22503	2.7822e-05	115.71	83.394	1992000000
TGME49_289690	_SAGVNIIPASTGAAK_	mitoBirA	2	678.878	0.21522	5.8149e-07	94.45	57.772	1991200000
TGME49_311720	_NEATINPTNTLFDVK_	mitoBirA	2	838.928	0.17492	9.7796e-15	150.76	141.97	1989100000
TGME49_284190	_(gl)QGASLPALGLSQESILSAVQTDPR_	APEX control	3	807.759	-1.4301	5.7794e-11	117.53	113.63	1988900000
TGME49_284190	_RFYAPFEATATVK_	BirA control	3	500.933	-1.3405	1.7467e-05	88.075	81.018	1988900000
TGME49_221320	_LDALDPNTQAYLALPR_	APEX control	2	885.973	-0.96909	4.4416e-15	151.11	138.32	1985800000
TGME49_221320	_LAMEGYEQDVESTVQK_	mitoBirA	2	913.927	-0.27036	2.5283e-15	153.72	143.81	1985600000
TGME49_284190	_QGASLPALGLSQESILSAVQTDPR_	mitoBirA	2	1219.65	-0.36054	1.5667e-66	219.65	206.28	1984100000
TGME49_284190	_HFFIEVNAR_	mitoAPEX	2	566.799	0.21516				1983200000
TGME49_248340	_YIPTLGVEVHPLK_	mitoBirA	3	489.285	-0.46381	0.00041444	66.989	54.72	1980500000
TGME49_261950	_FLSQPFTVAEVFTGKPGR_	mitoBirA	3	661.023	-0.95664	5.723e-15	125.45	114.84	1978600000
TGME49_221320	_VSAQGTLYLDPDWR_	mitoAPEX	2	810.904	0.25356	3.6529e-06	107.74	97.382	1977400000
TGME49_261950	_AAPLFADQSTEPGLLQTGIK_	mitoAPEX	2	1029.05	0.34403	9.3547e-47	192.25	175.94	1976700000
TGME49_221320	_LDALDPNTQAYLALPR_	BirA control	3	590.984	0.23968	5.4388e-12	130.95	122.16	1974800000
TGME49_273760	_NPENTIFDAK_	mitoBirA	2	574.783	0.038175				1973900000
TGME49_236210	_TQLLGHLDSTTAVAEDIGR_	mitoBirA	2	999.019	0.21071	2.3584e-25	158.53	151.58	1973100000
TGME49_251780	_GVNPDEAVAMGAAIQAGVLK_	mitoBirA	2	956.004	-0.23005	3.7938e-21	144.82	132.44	1971400000
TGME49_221320	_LLQDDLEAR_	mitoAPEX	2	536.785	0.048628	0.0038711	90.15	48.702	1970800000
TGME49_221320	_GFPIDALHTELFEVETQDGSK_	BirA control	3	778.381	-0.90796	1.7493e-22	153.25	146.76	1970600000
TGME49_230410	_VWGVSVDSAYTHQAWTR_	mitoBirA	3	654.987	0.11897	4.1264e-11	117.18	108.12	1969800000
TGME49_322210	_YTSEASCAFASVQHLVR_	mitoBirA	3	642.644	-2.7531				1969600000
TGME49_221320	_QPVFIYIPPHGELR_	BirA control	3	555.975	-0.88761	0.0035303	52.527	49.559	1967700000
TGME49_249900	_GAWANVLR_	mitoBirA	2	443.748	-0.15852				1966100000
TGME49_292920	_ENMQNSVLIEK_	mitoBirA	2	652.829	-0.60432	6.6712e-05	122.7	93.741	1965400000
TGME49_236210	_TQLLGHLDSTTAVAEDIGR_	mitoBirA	2	999.019	0.25056	4.7601e-32	178.84	178.84	1965300000
TGME49_247770	_GSGLHGPENGEFFR_	mitoBirA	3	501.904	0.15135	5.5821e-15	164.65	150.64	1965200000
TGME49_284190	_HNVDAIHPGYGFLSENAEFAAAVENAGLMLVGPPPEVIR_	BirA control	4	1026.27	0.39329	1.6488e-43	156.72	154.81	1965000000
TGME49_202680	_EHLVYSAECLR_	mitoAPEX	2	688.835	-0.012974	3.9438e-05	129.82	111.71	1964200000
TGME49_251780	_GVNPDEAVAMGAAIQAGVLK_	mitoAPEX	2	956.004	-0.23886	8.3401e-09	115.42	108.47	1963900000
TGME49_215590	_AGLPLEDLEFVQFHPTGIFPAGCLITEGCR_	mitoBirA	3	1115.55	-0.84196	0.0022485	42.341	40.293	1963200000
TGME49_219550	_KPASPVVAVQSPGREEK_	mitoBirA	3	593.663	-1.1074	1.5612e-10	114.52	101.74	1962600000
TGME49_294800	_SGDAAMVNMEPSKPMVVEAFTDYPPLGR_	BirA control	3	1003.81	-0.50403	1.5799e-69	206.48	203.92	1962300000
TGME49_244200	_DVCAATAVGDK_	mitoBirA	2	553.761	-0.77591	0.0064948	67.879	36.458	1961300000
TGME49_288380	_EVLHDKVEQVVVSNR_	mitoBirA	3	584.32	0.77579				1960600000
TGME49_268830	_ALDFLPVDVEHHGEEYTQK_	mitoBirA	4	557.522	-0.97299	1.8823e-06	93.371	88.114	1960300000
TGME49_311720	_LKDVEAVCNPIISK_	mitoBirA	3	529.292	-0.058077				1958700000
TGME49_290030	_VSTPGTLEVHTSPALQQQPHFHEEAAGHH_	mitoBirA	4	786.383	0.098861	1.8028e-05	58.924	54.429	1958600000
TGME49_221320	_VTAENPDEGFKPTSGR_	BirA control	2	852.913	-0.27939	6.4701e-05	89.311	81.602	1958200000
TGME49_306220	_LTFESLTSPAR_	mitoBirA	2	611.327	-1.3114	0.0093165	62.694	20.951	1958100000
TGME49_261950	_TVLIMELINNVANK_	mitoBirA	2	786.445	-1.2212	2.1513e-18	186.13	159.6	1956900000
TGME49_221320	_ASEDVPHVLTGDPIAQR_	mitoBirA	2	902.963	-0.83724	7.2742e-07	96.773	90.568	1955700000
TGME49_261950	_IPSAVGYQPTLATDLGQLQER_	mitoAPEX	2	1129.09	-0.081772	4.6281e-22	154.84	145.09	1954800000
TGME49_247770	_SYATEHGHFPFAPAR_	mitoBirA	3	563.271	0.32213	1.4358e-09	108.58	95.479	1953300000
TGME49_228470	_INWLCKPVMK_	mitoAPEX	3	430.235	-0.4693	0.0031551	70.056	50.398	1952900000
TGME49_292130	_VVVIDCQGHLLGR_	mitoAPEX	3	489.27	-0.3478	4.4948e-06	96.745	90.663	1952300000
TGME49_221320	_LFLHIVSPLNLASAK_	mitoBirA	3	541.659	-0.027582	5.2608e-15	141.82	138.5	1952000000
TGME49_244320	_AIVGLSLEDIKR_	mitoBirA	3	438.598	-0.14597	0.00016871	80.69	69.431	1951700000
TGME49_284190	_ANVQAVPGTNEPVTDFEEAAAFCR_	mitoAPEX	3	865.071	0.037146	1.9461e-11	122.18	118.37	1949500000
TGME49_261950	_IMNVIGEPVDECGPVPAKK_	mitoBirA	3	685.02	-0.19705	1.9054e-06	95.205	75.908	1948400000
TGME49_292920	_FQTSETPAGELISLDK_	mitoAPEX	2	868.441	0.13851	3.4643e-07	101.53	95	1948200000
TGME49_294800	_VPFVAISGFVGDNMVEK_	mitoBirA	2	904.966	-0.11274	5.5705e-11	122.46	111.46	1945200000
TGME49_306670	_YFVDDPQYVNTLHDSMEK_	mitoBirA	2	1101	-0.18723	1.3703e-38	204.71	200.45	1943600000
TGME49_221320	_DADPYPEVDR_	BirA control	2	588.762	0.057257	0.0012533	88.596	63.743	1942400000
TGME49_244200	_GHEIAAVNPLSLPQETPFVSGSR_	mitoBirA	2	1203.62	-0.24093	1.5016e-31	172.37	165.45	1941900000
TGME49_221320	_AYDETFTLSYVTGR_	BirA control	2	811.888	-1.8423	4.1073e-08	128.95	112.29	1940400000
TGME49_232090	_PTLSYSSHASPPGMSASDGSGGLR_	mitoBirA	3	773.694	0.061231	8.3412e-11	113.67	107.24	1939800000
TGME49_273760	_AIQEALDWLDKNQLAEKEEFEAK_	mitoBirA	4	680.346	-1.0657	1.0295e-66	218.72	208.1	1939400000
TGME49_226730	_ASDLFDWDEK_	mitoAPEX	2	613.272	0.20047	0.00020965	118.23	95.115	1938600000
TGME49_306220	_(gl)QKPVILDCLK_	mitoBirA	2	598.839	-0.069085	0.0021993	74.962	63.23	1938500000
TGME49_244200	_HAVLHDQTTFEPYSIFDSLK_	mitoBirA	4	587.794	-0.99568	1.3109e-06	98.175	92.026	1937800000
TGME49_288720	_GPLANTFPSAADITLPVA_	BirA control	2	877.97	-0.32586	0.00036596	79.346	70.311	1937400000
TGME49_305520	_SPYQEWSDYLAR_	mitoBirA	2	757.849	0.2091	2.03e-06	129.54	122.19	1936500000
TGME49_299070	_LPISALSAR_	mitoAPEX	2	464.285	0.17059	0.0015133	123.35	16.932	1936300000
TGME49_264040	_EWLLDLPPFSR_	mitoBirA	2	686.867	0.38199	2.571e-05	136.5	114.51	1933800000
TGME49_292920	_AELLEHLGTIAK_	mitoAPEX	2	647.872	-0.13116	1.0672e-07	145.81	120.34	1932200000
TGME49_268830	_DVERPTQAVQTLLGHLEATGR_	mitoBirA	3	764.408	0.41141	1.5116e-30	166.59	153.3	1931200000
TGME49_251780	_GVNPDEAVAMGAAIQAGVLK_	mitoAPEX	3	637.672	-1.3699	5.7665e-15	126.8	115.19	1929400000
TGME49_221320	_LAMEGYEQDVESTVQK_	mitoAPEX	3	609.621	-0.036114	1.1765e-10	122.33	113.76	1928700000
TGME49_262960	_VDPAAIAAIAR_	BirA control	2	534.314	-0.78569	0.0013305	83.081	64.409	1927900000
TGME49_292920	_ITSQQALWLQTSATEDEHR_	mitoAPEX	3	738.698	0.2723	9.556e-39	194.19	184.71	1927600000
TGME49_202680	_EHLVYSAECLR_	mitoBirA	3	459.559	-0.47577	1.0747e-05	125.74	93.578	1927500000
TGME49_245680	_TGIVFNVTQR_	mitoBirA	2	567.817	-0.23161	0.00019717	123.51	86.169	1927300000
TGME49_226970	_DVGLGFQTPR_	BirA control	2	545.288	0.11249	0.00016889	128.03	78.617	1927200000
TGME49_239100	_IVKPQGVEPTEIENEVAK_	mitoBirA	3	660.693	0.15844	1.0754e-06	99.392	90.647	1926400000
TGME49_297810	_TDLELTEEMVK_	mitoBirA	2	654.324	-0.65642	5.877e-05	123.67	96.19	1926300000
TGME49_247510	_IMDIQPSELHQR_	BirA control	3	489.586	-0.037122	1.5824e-05	113.38	98.588	1924900000
TGME49_232340	_TITCFGAASMQGWR_	mitoBirA	2	793.366	1.1935	3.9249e-14	159.58	121.13	1924200000
TGME49_220400	_FGVYDCGNK_	BirA control	2	530.232	-0.15478	0.0062313	83.783	61.546	1922300000
TGME49_245460	_NSIVAIDATPFK_	BirA control	2	638.351	0.12519				1919900000
TGME49_221320	_TGVMGAFQSLEEVQEVGDR_	mitoAPEX	2	1026.49	-0.51017	6.2734e-52	226.45	197.28	1919500000
TGME49_245680	_TGIVFNVTQR_	mitoBirA	2	567.817	0.27941	0.00044171	96.009	58.665	1919400000
TGME49_311720	_VLAPEEVSAMVLTK_	mitoBirA	2	743.913	-0.99706	7.4086e-06	100.11	87.844	1917600000
TGME49_311720	_NEATINPTNTLFDVK_	mitoBirA	2	838.928	-0.48875	9.9621e-14	140.96	118.41	1916500000
TGME49_288720	_GPLANTFPSAADITLPVA_	mitoBirA	2	877.97	-1.0697	3.0865e-15	138.19	129.39	1916300000
TGME49_313070	_LADPPAGAGASAAAEAPASPSPASSSAEEKPAK_	mitoBirA	3	987.819	0.34476	8.2451e-15	107.18	97.947	1916100000
TGME49_207440	_ISNVFVIGK_	BirA control	2	488.795	0.082595	0.0085	77.662	50.408	1911600000
TGME49_226590	_DLTTAETFHWEHAEAETPAQQIVSVNGR_	mitoBirA	3	1046.5	-0.84138	5.2201e-71	221.26	214.51	1910000000
TGME49_289690	_GIISYTDEEVVSSDFVHCK_	mitoAPEX	3	729.009	0.40444	6.5714e-10	111.77	105.95	1909900000
TGME49_235470	_IQNAIMAANPVLEAFGNAK_	mitoBirA	2	986.52	-0.37059	9.5862e-21	154.49	144.58	1907800000
TGME49_249900	_VSAEQGVASLWR_	BirA control	2	651.844	-0.98259	7.1459e-21	208.27	155.36	1907500000
TGME49_236210	_DSPLGYTILGPEENIR_	mitoAPEX	2	887.455	0.58465	6.2629e-20	166.3	152.07	1907000000
TGME49_244200	_PTSAAALTGAPLASESFLTGTSAAYVEQMYNAWQR_	mitoBirA	3	1220.93	-0.55293	4.6276e-44	169.18	166.74	1905700000
TGME49_235470	_AEIMEIVQQSK_	mitoBirA	2	638.334	-0.04981	4.0687e-09	130.1	130.1	1904100000
TGME49_245460	_LDPLLEEQFNTGR_	mitoAPEX	2	766.391	0.54305	1.4539e-11	153.81	130.95	1903800000
TGME49_226590	_DLTTAETFHWEHAEAETPAQQIVSVNGR_	mitoBirA	3	1046.5	0.055009	2.5945e-26	155.73	151.43	1903700000
TGME49_221320	_ASEDVPHVLTGDPIAQR_	mitoBirA	2	902.963	0.2938	1.3168e-24	159.4	150.65	1902400000
TGME49_311720	_VLAPEEVSAMVLTK_	BirA control	2	743.913	0.1846	0.00010542	78.505	68.993	1902400000
TGME49_294800	_THINLVVIGHVDSGK_	mitoBirA	3	530.298	0.1282	7.8063e-10	116.06	109.03	1902100000
TGME49_249900	_AMLFGPNNDANLFYK_	mitoAPEX	2	857.917	-0.025952	5.4011e-09	111.12	103.41	1901100000
TGME49_311720	_NAVVTVPAYFNDAQR_	mitoBirA	2	832.923	-1.564	4.9892e-09	112.17	98.754	1901000000
TGME49_246540	_DVVNFLTWATEPTADER_	mitoBirA	2	982.473	-0.047592	7.4889e-32	186.75	168.73	1900700000
TGME49_261950	_FLSQPFTVAEVFTGKPGR_	mitoBirA	3	661.023	0.11505	5.2731e-10	112.34	102.2	1899700000
TGME49_305520	_EYQIIDHFFQPGNCAAPLKDDVMK_	mitoBirA	4	709.841	-1.2106	2.8349e-17	140.41	131.03	1899500000
TGME49_306670	_YFVDDPQYVNTLHDSMEK_	mitoBirA	2	1101	-0.83127	8.1102e-20	149.95	146.32	1899200000
TGME49_313140	_TVVSEAAHGTVTR_	mitoBirA	3	443.237	-1.4682	4.0508e-06	98.592	69.289	1898500000
TGME49_221320	_IGMVGFLITLK_	mitoAPEX	2	596.362	-0.1257	0.0011957	84.479	59.006	1895600000
TGME49_236210	_DIPQCVDILSDILLNSTIDEEAVQMEK_	mitoBirA	4	772.882	-0.21537	8.9921e-05	53.197	48.603	1895300000
TGME49_251780	_RQEITIQSSGGLSDSQIEQMVK_	mitoBirA	3	812.08	0.093639	5.9944e-64	227.87	200.31	1895100000
TGME49_236210	_IILPTEKPFFCGSELLHR_	mitoAPEX	4	540.044	-0.33831	0.0051471	70.783	60.642	1895000000
TGME49_299070	_LPISALSAR_	mitoBirA	2	464.285	-0.60321	0.0079492	79.148	16.685	1893700000
TGME49_288500	_INPGTGIIFNITPSPGGTTCLGNAELDMR_	mitoAPEX	3	1006.17	-0.24142	6.1479e-46	186.84	176.37	1893500000
TGME49_227910	_LTAHGGYIQQTISPYQLK_	mitoBirA	3	673.362	0.13125	4.1918e-10	110.12	102.61	1893200000
TGME49_313140	_SEGGFVWACK_	mitoAPEX	2	570.761	-0.20933	0.00049634	92.732	85.63	1892300000
TGME49_311720	_NAVVTVPAYFNDAQR_	mitoBirA	2	832.923	0.037559	1.5327e-07	104.95	95.672	1892300000
TGME49_300000	_AGGECLTFDQLALR_	mitoAPEX	2	775.885	0.003755	7.7733e-15	170.66	162.95	1892100000
TGME49_239490	_SAVIGGIFDDVYDKEPWNLR_	mitoAPEX	3	765.387	0.40971				1891500000
TGME49_221320	_IFEEAPPTTVVPPHTMK_	BirA control	2	947.493	-0.079401	3.5427e-10	110.12	102.21	1888400000
TGME49_244200	_PTSAAALTGAPLASESFLTGTSAAYVEQMYNAWQR_	mitoBirA	3	1220.93	-0.94217	7.8239e-44	166.28	162.36	1887600000
TGME49_221320	_RDLCPTVPSLIELNR_	BirA control	3	594.989	-0.31513	1.2974e-09	110.35	103.91	1886200000
TGME49_311720	_ITPSYVAFTDDDRK_	mitoBirA	3	543.27	-0.32281	2.0523e-05	80.746	69.375	1886200000
TGME49_221320	_LFLHIVSPLNLASAK_	BirA control	2	811.985	-0.2607				1885700000
TGME49_221320	_TPIEYLVQLLEDK_	BirA control	2	780.93	-0.4925	7.0913e-14	162.41	137.71	1885600000
TGME49_207440	_FEAGNMAMVTGGHNVGR_	mitoBirA	3	583.272	-0.34002	8.6943e-05	70.167	60.63	1885100000
TGME49_284190	_NFGDVSMLPTAAYFTGLQPGESITVHMAGR_	mitoBirA	3	1056.51	-0.51794	3.4703e-38	168.26	164.4	1883800000
TGME49_221320	_IAANILAQTAGVPSIPWSGDSLK_	APEX control	3	770.422	-1.0657	1.0731e-10	116.45	113.57	1882400000
TGME49_239100	_IVKPQGVEPTEIENEVAK_	mitoBirA	3	660.693	-1.0658	2.1577e-10	119.68	108.07	1881400000
TGME49_226730	_GLSVPPYIVTTLSPGSR_	mitoAPEX	2	872.486	0.071345	5.8042e-05	81.346	71.215	1878000000
TGME49_229920	_DGFGVPAQIPPEVSQHIK_	mitoAPEX	3	640.339	0.10624	0.0044346	45.347	38.397	1877000000
TGME49_292130	_DQVAFLQQYGHA_	BirA control	2	688.833	-0.96961	1.2189e-07	144.17	111.31	1875800000
TGME49_292130	_LGDLSSQVGWSHGDLVAR_	mitoBirA	3	632.99	0.38964	1.7994e-10	118.48	108.23	1875300000
TGME49_221320	_DMFEEILK_	mitoBirA	2	512.755	0.26113				1874300000
TGME49_261950	_KGSITSVQAVYVPADDLTDPAPATTFAHLDATTVLSR_	mitoBirA	4	957.997	0.12575	8.4183e-19	95.002	93.698	1874000000
TGME49_292920	_TPAVVTGFLSSTLR_	mitoBirA	2	724.909	-0.22503	2.7797e-11	142.45	117.31	1873300000
TGME49_319920	_AVSLALDETPILNSK_	mitoAPEX	2	785.938	-2.7786	6.8276e-29	194.48	161.2	1871100000
TGME49_232090	_HSQVALLDISETQLQR_	mitoBirA	3	613.33	0.21772	1.5199e-42	222.45	204.43	1870600000
TGME49_311720	_NEATINPTNTLFDVK_	BirA control	2	838.928	-0.54692	2.1745e-14	142.91	121.56	1869200000
TGME49_290600	_IGIMPGYIHAK_	mitoAPEX	3	400.558	-0.20307	0.0047927	57.532	51.991	1866500000
TGME49_299070	_GDLGVELPNIAWLPR_	mitoBirA	2	825.454	-0.070272	1.0539e-14	150.26	129.68	1865800000
TGME49_284190	_LDGAIGASGAVVQPYYDSLLVK_	mitoBirA	2	1118.6	0.25544	1.3871e-22	155.71	147.8	1865400000
TGME49_294800	_NMITGTSQADVALLVVPAEAGGFEGAFSK_	mitoAPEX	3	960.82	0.034273	2.7325e-26	143.07	138.91	1865300000
TGME49_228470	_INWLCKPVMK_	mitoBirA	3	430.235	-0.55945				1863600000
TGME49_288720	_GPLANTFPSAADITLPVA_	mitoBirA	2	877.97	0.043271	1.8368e-09	110.35	100.28	1860800000
TGME49_261950	_AALVYGQMNEPPGAR_	mitoBirA	2	787.393	-0.072254	6.8689e-11	127.32	119.87	1860400000
TGME49_273760	_SINPDEAVAYGAAVQAAILK_	mitoBirA	2	1001.04	0.35417				1860200000
TGME49_236210	_EHILEYINR_	mitoBirA	3	396.212	0.35217	0.00016549	149.65	108.93	1859600000
TGME49_247510	_IMDIQPSELHQR_	BirA control	3	489.586	-0.20986	1.0871e-05	117.09	102.3	1859300000
TGME49_299070	_GDLGVELPNIAWLPR_	mitoAPEX	2	825.454	-0.63194	0.00049868	68.168	58.368	1859000000
TGME49_221320	_FFFLELNPR_	BirA control	2	591.819	-0.0201	0.0016763	120.15	100.16	1858800000
TGME49_299070	_GLGDIESVSHTASPGSSVVR_	mitoAPEX	3	652.332	-0.36296	9.3913e-22	143.57	123.52	1858700000
TGME49_284190	_IGHPPFGFPEPLR_	BirA control	2	732.393	-0.73371	1.9997e-06	120.57	106.56	1858500000
TGME49_221320	_IRDILSSLPESER_	mitoAPEX	3	505.611	0.030821	3.0988e-07	122.97	101.57	1858500000
TGME49_311720	_NEATINPTNTLFDVK_	mitoBirA	2	838.928	-1.0698	7.6074e-10	123.02	102.79	1858300000
TGME49_232340	_EKLQAAGNVTSATLK_	mitoBirA	3	510.954	0.033224	2.2463e-11	127.57	112.03	1857300000
TGME49_284190	_AEELSFPSSVVEFLQGR_	mitoAPEX	2	947.981	-0.20375	2.591e-15	132.84	124.35	1857200000
TGME49_245620	_ETCGAGVFMAAHK_	mitoBirA	2	689.816	0.14306	0.0015453	68.676	65.596	1856800000
TGME49_251780	_NEAETLIYSVEK_	mitoAPEX	2	698.354	-0.00045445	0.00078557	79.639	79.639	1856500000
TGME49_284190	_QGASLPALGLSQESILSAVQTDPR_	mitoAPEX	2	1219.65	0.28196	7.9211e-66	210.05	200.1	1854600000
TGME49_245460	_NSIVAIDATPFK_	mitoBirA	2	638.351	0.48771				1854600000
TGME49_292130	_LQVFEGVPTMVER_	mitoAPEX	2	752.895	-0.66138	2.0955e-05	95.854	81.674	1853300000
TGME49_306220	_ELFEDAVDNLKEEYQR_	mitoBirA	3	666.653	0.18221	1.1425e-11	126.77	126.77	1852700000
TGME49_284190	_EAVPNIPFQMLLR_	BirA control	2	764.421	-0.73	7.3685e-06	108.56	94.555	1851600000
TGME49_226590	_DLVELFLVHQK_	mitoAPEX	2	670.882	0.27541	6.6783e-05	122.69	113.99	1851300000
TGME49_244200	_CRDFLPSQQYEYSPQWK_	mitoBirA	3	744.677	-0.047386	3.9899e-25	160.66	151.37	1850800000
TGME49_230410	_FPLVSDLDK_	mitoAPEX	2	517.282	-0.97474	0.0085	77.662	47.919	1850600000
TGME49_221320	_HIEVQIVGDEDGQAVALSGR_	BirA control	3	698.359	0.16674	2.8603e-30	161.47	152.61	1846200000
TGME49_260170	_GVQPLLDAVCR_	mitoBirA	2	614.329	-1.3863	0.00014417	113.22	91.169	1845100000
TGME49_209030	_AVFPSIVGKPK_	mitoBirA	3	381.569	-0.30456	0.0032622	61.815	50.89	1844400000
TGME49_221320	_DILSSLPESERR_	BirA control	3	467.916	0.46796	0.0010821	64.121	32.524	1844400000
TGME49_250770	_SQIYDVFK_	mitoBirA	2	500.261	0.16534				1843000000
TGME49_292130	_DQVAFLQQYGHA_	mitoBirA	2	688.833	0.12398				1842300000
TGME49_244200	_CRDFLPSQQYEYSPQWK_	mitoBirA	3	744.677	-0.079377	2.1706e-44	214.5	204.98	1841800000
TGME49_221320	_TGVMGAFQSLEEVQEVGDR_	mitoBirA	3	684.662	-0.35271	1.0441e-32	179.1	168.12	1839300000
TGME49_262670	_STGEILAVNEIR_	mitoBirA	2	651.357	-0.22377	1.1133e-07	145.31	94.025	1838500000
TGME49_239330	_TYNWSEK_	BirA control	2	464.214	0.31673				1837500000
TGME49_311720	_LKDVEAVCNPIISK_	BirA control	3	529.292	-0.064909	1.6907e-05	86.539	76.418	1835200000
TGME49_215590	_AEFPLTYR_	mitoAPEX	2	498.761	0.10654				1834900000
TGME49_221320	_EDGTFVSGFFDK_	mitoBirA	2	674.806	0.35328				1834700000
TGME49_245460	_LDPLLEEQFNTGR_	APEX control	2	766.391	-0.36169	2.158e-11	152.16	137.17	1834500000
TGME49_244200	_QTGIVVMLPHGYDGQGPEHSSGR_	mitoAPEX	4	606.295	-0.27504	9.3609e-06	89.923	88.515	1832800000
TGME49_249900	_MLIQTQDSIPEIK_	APEX control	2	758.408	-0.99948	7.1748e-06	109	96.729	1832800000
TGME49_221320	_LRVDQIEVK_	mitoAPEX	3	367.221	0.41599	0.0024493	80.755	33.049	1832300000
TGME49_228470	_VLNSYWVGQDAVYK_	BirA control	2	821.417	-0.030294	3.8439e-06	107.35	92.36	1832000000
TGME49_284190	_ANVQAVPGTNEPVTDFEEAAAFCR_	mitoAPEX	2	1297.1	-0.29767	4.538e-22	142.32	138.48	1830900000
TGME49_299070	_SGEPLDLPVFTSTK_	mitoBirA	2	745.89	-0.78974	8.1158e-06	98.676	90.361	1830200000
TGME49_226730	_VSLNLSELEPCVAGPK_	mitoAPEX	2	856.948	0.049941	1.1917e-12	140.49	121.66	1829200000
TGME49_221320	_LIFENEVK_	mitoAPEX	2	496.277	0.054068				1828900000
TGME49_290840	_APASLLQPLADIFAK_	mitoBirA	2	777.948	-0.17971	3.7963e-15	154.69	120.85	1828200000
TGME49_248340	_RLTNQPALSFVGEHAK_	mitoBirA	3	589.988	-0.9563	8.3163e-05	70.334	64.87	1828000000
TGME49_247550	_VELEKPFVLLYDKR_	mitoAPEX	3	583.67	0.028956	2.3748e-06	107.5	100.66	1827900000
TGME49_288380	_EVLHDKVEQVVVSNR_	mitoBirA	3	584.32	0.53055	7.0166e-20	161.94	161.94	1827200000
TGME49_244200	_HAVLHDQTTFEPYSIFDSLK_	mitoBirA	4	587.794	0.2673	5.1908e-07	104.45	99.924	1826800000
TGME49_284190	_LDGAIGASGAVVQPYYDSLLVK_	mitoAPEX	3	746.067	0.30068	4.5461e-07	101.74	101.74	1822800000
TGME49_215590	_IFAGVNAEKEPIPVLPTVHYNMGGIPTNWR_	mitoAPEX	4	830.937	-0.47918	6.7239e-06	59.536	55.502	1822600000
TGME49_226730	_VLLQDFTGVPAVVDLAAMR_	mitoAPEX	3	672.371	-0.12047	1.615e-06	97.095	84.255	1822000000
TGME49_221320	_EPPEAEGLLGR_	mitoBirA	2	584.304	-0.55423	0.00093502	87.184	42.321	1818500000
TGME49_254030	_GTPFKPVMYIPSITGK_	mitoAPEX	2	868.476	0.20992	0.00024396	80.316	72.607	1814000000
TGME49_232090	_ALFAKPTLSYSSHASPPGMSASDGSGGLR_	mitoBirA	4	713.103	-0.035234	1.8347e-10	93.949	90.049	1813500000
TGME49_264040	_EWLLDLPPFSR_	mitoBirA	2	686.867	0.11841	2.0664e-07	170.89	148.9	1812500000
TGME49_245460	_LLGVVYNASNNELVR_	BirA control	2	830.954	-1.0884	1.3371e-14	148.41	131.68	1809700000
TGME49_202680	_SSIFMNLECR_	mitoAPEX	2	628.792	-0.38344	0.00015047	130.41	104.29	1809000000
TGME49_221320	_EIPVAFWSFR_	mitoAPEX	2	626.33	0.15866	0.00049028	93.096	70.454	1808800000
TGME49_226590	_DLTTAETFHWEHAEAETPAQQIVSVNGR_	mitoBirA	3	1046.5	-0.52794	7.1571e-45	186.13	182.18	1808200000
TGME49_204020	_NAALTIGNILPLNK_	mitoBirA	2	726.433	-0.10666	1.6814e-06	116.51	76.233	1806800000
TGME49_289690	_SAGVNIIPASTGAAK_	APEX control	2	678.878	-0.69355	5.8149e-07	94.45	58.773	1806200000
TGME49_221320	_VTAENPDEGFKPTSGR_	APEX control	3	568.944	-1.0512	0.00071723	58.98	48.119	1804300000
TGME49_263300	_YCVSDVTTEVK_	BirA control	2	650.808	0.45585	0.0016039	80.245	71.835	1803200000
TGME49_221320	_SGTASAGIDLLSHLFGDGSVSLK_	APEX control	3	744.722	-0.91066	4.9796e-31	158.37	150.9	1802000000
TGME49_312090	_LPACSLGDLVLATVK_	BirA control	2	778.939	-0.071086	1.7506e-14	145.69	131.61	1801600000
TGME49_247770	_SGAIKPIGSQQFNPAGK_	mitoAPEX	3	567.309	0.057411	3.6447e-08	106.79	97.22	1801600000
TGME49_294800	_THINLVVIGHVDSGK_	BirA control	3	530.298	0.1433	3.4703e-12	137.91	130.62	1800300000
TGME49_221320	_DMFEEILK_	BirA control	1	1024.5	-0.57463				1799400000
TGME49_268830	_ALDFLPVDVEHHGEEYTQK_	mitoBirA	3	743.027	1.3047	0.0010556	64.331	58.215	1799400000
TGME49_248340	_YIPTLGVEVHPLK_	BirA control	3	489.285	0.029712	4.6788e-05	77.279	65.01	1799000000
TGME49_299070	_VQLPHPEILSVLRPDDIVLMDDGK_	mitoAPEX	4	675.616	0.41552	1.4719e-31	165.85	161.42	1798700000
TGME49_249900	_YTGIVDCFR_	BirA control	2	565.769	-1.0954	0.0026827	100.02	78.024	1798600000
TGME49_322210	_EVAAGWEFR_	mitoBirA	2	532.762	-2.1741	0.0020071	113.66	65.789	1798100000
TGME49_306670	_AIFGNWCTR_	mitoAPEX	2	562.769	-0.21876	0.0061515	83.998	69.7	1796900000
TGME49_232090	_HSQVALLDISETQLQR_	mitoBirA	3	613.33	-0.12245	6.764e-21	169.98	158.66	1793700000
TGME49_261950	_TREGNDLYHEMMTTGVIK_	mitoBirA	3	699.003	-0.55658	1.6549e-06	94.45	79.857	1793600000
TGME49_247770	_SYATEHGHFPFAPAR_	mitoBirA	4	422.705	0.002838	8.9328e-08	97.631	90.944	1792900000
TGME49_313140	_AESLVCDGPGDFTISFTPAGGSR_	mitoAPEX	2	1171.04	-0.23016	5.8241e-84	239.57	214.42	1792700000
TGME49_249900	_YFPTQAFNFAFK_	BirA control	2	740.867	-0.11633	0.00019616	98.156	89.905	1791400000
TGME49_261950	_VVDTGAPIQVPVGVETLGR_	mitoAPEX	3	636.358	1.3889	1.9844e-07	107.15	97.014	1791300000
TGME49_284190	_FVSYQNAGTVEFLVEGDR_	BirA control	2	1015.99	0.19657	1.0471e-37	197.38	182.11	1788700000
TGME49_229180	_TDFSDSDLNEEIKK_	BirA control	3	547.593	0.74636				1788400000
TGME49_268890	_AAVEAALDALAEK_	mitoBirA	2	636.346	-1.0688				1788000000
TGME49_319920	_ELLENPAMMLLHLR_	mitoBirA	2	840.452	-0.68029	3.1731e-14	162.22	146.28	1787200000
TGME49_244200	_PTSAAALTGAPLASESFLTGTSAAYVEQMYNAWQR_	mitoBirA	4	915.946	-0.21053	2.4705e-28	137.29	135.53	1786800000
TGME49_263700	_IEDVTPIPTDSTR_	APEX control	2	722.37	-1.0694	4.438e-06	115.12	99.574	1784400000
TGME49_221320	_LDALDPNTQAYLALPR_	mitoAPEX	3	590.984	-0.24819	0.0019828	48.899	48.899	1783600000
TGME49_320050	_VLATAESTELPR_	mitoBirA	2	643.851	-0.15281	1.2341e-08	155.99	97.29	1783200000
TGME49_292920	_AVFYIPEDPPSR_	mitoBirA	2	695.854	-0.018074				1781900000
TGME49_221320	_IKVEWNDASNPSLGFK_	APEX control	3	602.312	-0.9305				1779900000
TGME49_284190	_NFGDVSMLPTAAYFTGLQPGESITVHMAGR_	mitoAPEX	3	1056.51	-0.50306	2.9439e-48	178.7	174.84	1779600000
TGME49_207440	_ISNVFVIGK_	BirA control	2	488.795	0.14841	0.0083386	78.098	46.869	1778100000
TGME49_244320	_AIVGLSLEDIKR_	mitoAPEX	3	438.598	0.030019	3.8748e-05	100.93	82.795	1777100000
TGME49_292920	_TFTLQDTGVGMTK_	mitoBirA	2	699.85	-0.55243	3.63e-08	136.3	119.64	1776700000
TGME49_262960	_VDPAAIAAIAR_	APEX control	2	534.314	-0.47049	0.002641	74.962	58.291	1776400000
TGME49_254620	_QNRPIPPWIR_	BirA control	3	426.247	-1.0609	0.0042492	66.568	48.509	1775800000
TGME49_284190	_AAIPGGAGSIAGAPEDLDLR_	APEX control	3	617.658	-0.85568	0.00051055	71.872	65.436	1775500000
TGME49_309820	_IACYVTVR_	BirA control	2	491.263	-0.079485				1775500000
TGME49_251780	_RQEITIQSSGGLSDSQIEQMVK_	mitoBirA	3	812.08	-0.83402	8.395e-41	186.35	167.61	1775400000
TGME49_286530	_QFHPEGLEAQAPRPHQGLDMR_	mitoBirA	4	604.3	-0.74462	4.5386e-40	186.01	170.98	1775200000
TGME49_232090	_ALFAKPTLSYSSHASPPGMSASDGSGGLR_	mitoBirA	4	713.103	-0.30096	1.7196e-08	80.02	76.216	1775100000
TGME49_221510	_VLHVMDSQLVK_	mitoBirA	3	423.573	-0.067744	8.8623e-06	129.82	100.05	1773300000
TGME49_250770	_SQIYDVFK_	BirA control	2	500.261	0.58508				1773100000
TGME49_221320	_NVCLFALTTPMDFGTEEEK_	mitoAPEX	2	1101.51	0.13283	5.7716e-39	204.23	181.4	1772900000
TGME49_221320	_EVYASQDQLGGPEVMFR_	mitoBirA	2	963.457	0.064504				1772800000
TGME49_249900	_GAWANVLR_	BirA control	2	443.748	0.056772				1771200000
TGME49_263300	_YCVSDVTTEVK_	BirA control	2	650.808	-0.094471	0.0013208	83.182	75.317	1770800000
TGME49_244200	_LLNEGVVTEADLQQLK_	mitoBirA	3	590.66	-0.8822	1.8868e-15	145.7	133.78	1770500000
TGME49_221320	_IVEVPGGPNR_	BirA control	2	519.291	0.020834	0.00094243	90.15	66.12	1769800000
TGME49_226730	_GEIIPGSLMTVK_	mitoAPEX	2	622.85	-0.38556				1769500000
TGME49_221320	_IRDILSSLPESER_	BirA control	2	757.912	0.064897	0.00010528	96.673	70.261	1768200000
TGME49_243250	_LLVAMNPFK_	mitoBirA	2	516.799	-0.092502				1768000000
TGME49_284540	_LFVDSPAVSVQQK_	mitoAPEX	2	709.388	0.40783	2.5307e-06	119.39	103.45	1768000000
TGME49_254620	_(gl)QNRPIPPWIR_	BirA control	2	630.354	0.1264	0.0032037	72.607	52.617	1767400000
TGME49_232340	_KGVSPAGLAESLSR_	mitoBirA	3	457.925	-0.05948	1.8577e-06	98.582	83.791	1764100000
TGME49_261950	_AALVYGQMNEPPGAR_	mitoBirA	2	787.393	-0.21589	1.2013e-19	166.86	159.5	1762100000
TGME49_219550	_SELNPAFQER_	mitoAPEX	2	595.794	0.16291	0.0012533	88.596	65.955	1761000000
TGME49_268890	_AAVEAALDALAEK_	mitoBirA	2	636.346	0.0038371	9.1365e-05	84.173	63.135	1759700000
TGME49_202680	_KPPTVVAYGDVSTVPHYEEVR_	mitoAPEX	3	781.737	0.06495	2.6575e-15	131.33	121.59	1758600000
TGME49_207440	_ISNVFVIGK_	APEX control	2	488.795	-1.0423	0.0049432	87.258	56.029	1755800000
TGME49_268890	_GLTAILTETSTLHAEK_	mitoAPEX	3	562.309	0.15916	6.4894e-16	153.23	136.35	1754600000
TGME49_294800	_QMIVGINK_	BirA control	2	451.76	-0.17976				1754600000
TGME49_236210	_IILPTEKPFFCGSELLHR_	mitoAPEX	4	540.044	-0.53282	1.4389e-10	119.8	112.56	1753900000
TGME49_221320	_LQVDGTTVLLPNVFDPSELR_	APEX control	2	1107.09	-0.78156	2.3497e-21	149.53	132.29	1750400000
TGME49_261570	_NCPVLAIDNVR_	mitoBirA	2	635.832	-0.26392	8.1785e-05	120.86	111.64	1750300000
TGME49_268830	_DVERPTQAVQTLLGHLEATGR_	mitoBirA	4	573.558	0.10137	6.4437e-07	102.45	92.537	1748600000
TGME49_221320	_GVISSIVNWK_	APEX control	2	551.816	-0.84624	0.0033529	78.098	58.108	1747900000
TGME49_294800	_YHYTVIDAPGHR_	BirA control	3	476.905	0.25366	0.00347	52.247	52.247	1747200000
TGME49_251780	_GVNPDEAVAMGAAIQAGVLK_	mitoBirA	2	956.004	-0.27117	0.0030599	71.637	69.25	1746000000
TGME49_284190	_IGHPPFGFPEPLR_	mitoBirA	2	732.393	-0.10185	1.345e-05	102.87	90.953	1744700000
TGME49_309820	_VLEQLTGQRPQFSK_	mitoBirA	3	544.302	0.097958				1744100000
TGME49_292920	_AVFYIPEDPPSR_	mitoBirA	2	695.854	-1.0241	0.001035	75.819	64.365	1743900000
TGME49_230410	_FHSLLNNSVALR_	mitoBirA	3	457.589	-0.28054	5.4879e-07	127.03	108.22	1743700000
TGME49_260180	_VFEDADNVAMAVR_	mitoBirA	2	718.846	0.059478				1742400000
TGME49_245680	_KGDYVDIVCDPSVQK_	BirA control	3	574.95	-0.061861	4.5829e-06	85.28	74.235	1741000000
TGME49_220400	_IQFVLWCPDNAPVKPR_	mitoAPEX	3	647.345	-0.14107				1739900000
TGME49_294800	_NMITGTSQADVALLVVPAEAGGFEGAFSK_	BirA control	3	960.82	-0.32919	6.8234e-35	158.72	148.06	1739600000
TGME49_320050	_VLATAESTELPR_	BirA control	2	643.851	-0.28483	1.4113e-07	142.1	91.989	1739500000
TGME49_309752	_SKDCTQIEVNPLVETHDGR_	mitoAPEX	3	733.355	-0.15115	6.0476e-26	161.95	155.43	1739200000
TGME49_227910	_LTAHGGYIQQTISPYQLK_	mitoBirA	3	673.362	0.053031	0.00020475	73.788	67.295	1739200000
TGME49_288750	_ITANSPVQYVPSPPTK_	mitoBirA	2	849.957	0.12583	1.2877e-09	118.48	109.95	1739100000
TGME49_245460	_SFYGLDLGK_	BirA control	2	500.261	0.17147				1738400000
TGME49_294800	_SVEMHHEVMEQAVPGDNVGFNVK_	BirA control	3	851.734	-0.17958	1.0762e-10	116.43	110.29	1738200000
TGME49_221320	_IDFINEDYLPIQR_	mitoBirA	2	818.422	-1.0035	1.3465e-26	205.87	176.52	1736800000
TGME49_288500	_NNSQTIHCGDIETNYTVEK_	mitoBirA	3	741.671	-0.1016	1.251e-32	177.02	163.39	1736500000
TGME49_214790	_TIQSEIQHEQSTYEQDADLKK_	mitoAPEX	3	831.07	-0.34605	1.2823e-22	154.34	146.23	1736300000
TGME49_288500	_VYLDLLGTSHMR_	mitoAPEX	3	468.915	-0.15962	3.2994e-05	103.44	94.245	1736200000
TGME49_292920	_TFTLQDTGVGMTK_	mitoAPEX	2	699.85	-0.2265				1733900000
TGME49_244560	_FTALSHPEVLEPK_	mitoBirA	3	489.933	-0.97234	0.0043372	52.891	35.292	1733600000
TGME49_251780	_ILQHLIDEFKK_	mitoBirA	3	461.938	-0.28221	9.4172e-05	93.839	54.965	1733500000
TGME49_204020	_NAALTIGNILPLNK_	mitoBirA	2	726.433	0.039423	1.1411e-06	119.25	78.976	1733400000
TGME49_306220	_YYYNAATQQSQWEKPEAMMTEEEKK_	mitoBirA	4	771.599	-0.21145	8.1857e-32	162.11	159.48	1731600000
TGME49_249900	_GAWANVLR_	mitoBirA	2	443.748	-1.2216				1731300000
TGME49_247550	_DTTLVIEGGGEK_	mitoAPEX	2	609.814	0.25451				1731000000
TGME49_221320	_IRDILSSLPESER_	BirA control	3	505.611	-0.68179				1730700000
TGME49_221320	_ASEDVPHVLTGDPIAQR_	mitoBirA	2	902.963	0.16654				1730200000
TGME49_261950	_VALTALSVAEYFR_	mitoAPEX	2	720.398	0.20051	6.6073e-05	86.756	37.458	1729200000
TGME49_232340	_QVCEDLCDECLAEDPLQSEGHGCDNMTCLIVELSSCLK_	mitoBirA	4	1121.98	-0.95642	3.2065e-24	120.34	119.96	1728500000
TGME49_297810	_GQYTVPSYVADYSPIEIPR_	mitoBirA	2	1078.04	2.5384	8.7308e-06	94.632	85.158	1728200000
TGME49_221320	_LGGIPFGAIAVETR_	mitoBirA	2	700.898	-0.03611	2.6709e-08	133.16	109.48	1724300000
TGME49_292920	_FQTSETPAGELISLDK_	mitoBirA	2	868.441	-0.87582	2.4249e-07	103.66	92.546	1722800000
TGME49_221320	_NVCLFALTTPMDFGTEEEKLK_	mitoAPEX	3	815.068	-1.3432				1719900000
TGME49_251780	_VQTEVNLPFITADQTGPK_	mitoAPEX	2	979.515	-0.80916	1.1516e-25	171.25	140.68	1719700000
TGME49_265370	_TVGVHLPYTGR_	mitoBirA	2	600.33	0.066136				1717700000
TGME49_219550	_LKGAQNTAAMLTTFNECDMGALMAMR_	mitoBirA	3	949.442	-0.62824	5.0883e-56	199.85	197.56	1717000000
TGME49_235470	_LPSEEYQLGK_	mitoBirA	2	582.301	-0.73322				1716400000
TGME49_215590	_GSDWLGDQDAIQHMCR_	mitoAPEX	3	630.274	0.059971	5.328e-16	153.94	148.48	1716000000
TGME49_290600	_IAALEDAGVHVVR_	mitoAPEX	3	450.589	-0.011209	2.4047e-08	127.17	90.757	1715700000
TGME49_221320	_TGPQLYVLK_	APEX control	2	509.8	-0.40603				1715500000
TGME49_226730	_EDFQVSLR_	mitoAPEX	2	497.254	0.066183				1714400000
TGME49_284190	_AAIPGGAGSIAGAPEDLDLR_	APEX control	2	925.984	-1.0267				1714000000
TGME49_319920	_ELLENPAMMLLHLR_	mitoBirA	3	560.637	-0.64117	5.2261e-07	113.24	100.82	1713800000
TGME49_292920	_FQTSETPAGELISLDK_	mitoBirA	2	868.441	-0.01827	1.3377e-07	105.89	95.271	1712000000
TGME49_221320	_GENLPLIIFANWR_	mitoAPEX	2	771.925	-0.05704	3.0225e-11	150.14	140.3	1711400000
TGME49_232340	_ITLYGGCEDK_	mitoBirA	2	578.271	-1.2845	0.00038714	99.283	88.996	1711300000
TGME49_244560	_FTALSHPEVLEPK_	mitoBirA	3	489.933	0.080433	0.0049828	51.643	39.935	1710500000
TGME49_226730	_EPAPIEDIVDAYCLLNLGDSITTDHISPAGNIAVNSPAAK_	mitoAPEX	3	1388.03	-0.51912	1.6499e-21	98.397	96.837	1710100000
TGME49_239100	_IVKPQGVEPTEIENEVAK_	mitoAPEX	3	660.693	0.20776	0.00068368	67.902	58.333	1708100000
TGME49_236210	_NDDMGPTAHVAVGFEGVPWK_	mitoBirA	2	1064	-0.36046	2.5115e-22	156.36	150.39	1708100000
TGME49_209030	_AVFPSIVGKPK_	BirA control	3	381.569	-0.59063	0.0013801	72.2	58.391	1708000000
TGME49_215590	_AYQSCTSAHTCTGDGGGMVSR_	mitoBirA	3	734.97	-0.88029	1.9391e-15	133.84	130.9	1707600000
TGME49_284190	_VVGDFAQFLVQNK_	APEX control	3	488.933	-0.7979	1.5038e-06	110.08	102.47	1707500000
TGME49_289690	_LVELAHYMSVQDGA_	BirA control	2	766.874	-1.3372	0.0026171	57.52	50.23	1706800000
TGME49_261570	_NCPVLAIDNVR_	mitoBirA	2	635.832	0.08378	0.00017552	109.39	99.159	1705700000
TGME49_312160	_PRPTQYQTEICNQATNVQPGVEKDPTK_	mitoBirA	3	1033.84	-1.1026	1.1889e-12	117.03	117.03	1705700000
TGME49_312090	_LPACSLGDLVLATVK_	mitoAPEX	2	778.939	-0.14545				1704400000
TGME49_284190	_LGIDAAGAAGGVVEAAMAYTGNVADPDR_	BirA control	3	878.094	-0.39395	2.6776e-25	142.23	136.38	1703600000
TGME49_221320	_(gl)QGDLTGAEAPLR_	BirA control	2	605.807	0.012249				1703500000
TGME49_273760	_SINPDEAVAYGAAVQAAILK_	mitoBirA	2	1001.04	-0.14128	0.0023663	71.592	63.348	1702600000
TGME49_320050	_VLLDVGIVR_	BirA control	2	492.316	0.091136	0.0029343	94.85	47.768	1702400000
TGME49_278990	_VVQLFYDNIFTKPK_	mitoAPEX	3	571.319	-0.085063	1.4686e-05	87.519	87.519	1701200000
TGME49_265370	_AALECSPEINPAR_	mitoAPEX	2	714.351	-0.025368	2.191e-17	174.05	152.02	1699600000
TGME49_311720	_ITPSYVAFTDDDRK_	BirA control	3	543.27	-0.10884	8.8543e-06	88.282	82.567	1699500000
TGME49_292920	_AELLEHLGTIAK_	mitoBirA	2	647.872	0.28733	3.3065e-08	153.75	131.42	1699400000
TGME49_299070	_AEVSDVANAVYDGADAVMLSGETAAGNAPAR_	mitoBirA	3	998.137	-0.46555	3.3739e-74	216.76	212.17	1699000000
TGME49_243960	_VGSDACASPTVKPAAAEAPELEEK_	mitoBirA	3	809.728	-1.0672	2.9258e-31	163.15	158.39	1698900000
TGME49_219550	_KVPEVNAFIEGNEIVYK_	mitoBirA	2	975.023	0.10244				1698300000
TGME49_221320	_NVCLFALTTPMDFGTEEEKLK_	mitoAPEX	3	815.068	-1.3274	1.2625e-10	122.35	117.09	1697900000
TGME49_288720	_VDIGQILMSIR_	BirA control	2	622.855	-0.21391	9.5609e-07	160.52	122.56	1697100000
TGME49_250770	_DFTVSSMHGDMDQK_	mitoBirA	3	533.226	-0.65167	2.2621e-06	94.717	15.103	1697100000
TGME49_284190	_LDGAIGASGAVVQPYYDSLLVK_	mitoBirA	2	1118.6	-0.49263	2.6275e-30	164.18	142.12	1696400000
TGME49_311720	_LKDVEAVCNPIISK_	mitoBirA	3	529.292	-1.0446	3.4213e-05	78.902	71.611	1696000000
TGME49_288720	_ESNVATAVTALR_	BirA control	2	616.336	-0.13149	4.481e-06	124.48	101.11	1695400000
TGME49_249900	_GAGGALVLVFYDELKK_	mitoAPEX	3	560.65	-0.10718	0.0027586	51.359	42.324	1694700000
TGME49_221320	_VSAQGTLYLDPDWR_	mitoAPEX	2	810.904	-0.34661	3.0524e-11	141	126.57	1694100000
TGME49_206470	_YDVVVVGGGPGGYVAAIK_	mitoAPEX	2	860.967	0.36092	0.00024392	83.751	78.036	1693800000
TGME49_319920	_ELLENPAMMLLHLR_	mitoBirA	2	840.452	-0.53634	3.3874e-08	131.06	118.64	1693300000
TGME49_250770	_GIYSYGFEKPSAIQQR_	mitoAPEX	3	615.316	0.16194	7.6086e-06	86.548	70.374	1692800000
TGME49_319920	_ELLENPAMMLLHLR_	mitoBirA	3	560.637	-0.53735	7.9916e-09	130.56	118.14	1692700000
TGME49_220400	_IQFVLWCPDNAPVKPR_	mitoAPEX	3	647.345	1.1271	0.0003916	59.728	55.63	1692000000
TGME49_207440	_FVPHPIREEEASYK_	BirA control	4	426.22	-0.010505	0.0014932	57.434	51.612	1691900000
TGME49_294800	_EHALLAFTLGVK_	mitoBirA	2	649.877	0.90408	2.7971e-05	120.53	105.43	1691000000
TGME49_226590	_MNVWGNHDLLMK_	mitoBirA	2	729.355	-1.9322				1689100000
TGME49_247550	_VELEKPFVLLYDK_	mitoAPEX	3	531.636	0.20308	2.3784e-06	109.07	102.17	1688100000
TGME49_306650	_AEDVAAHDFPQLLHR_	mitoAPEX	4	430.471	0.007487	4.8458e-06	83.692	76.634	1687800000
TGME49_215460	_SSGFAMIYDNPNAAK_	mitoBirA	2	793.369	-0.07852	2.2972e-14	142.1	137.8	1687800000
TGME49_311720	_NAVVTVPAYFNDAQR_	BirA control	2	832.923	0.27503	1.5327e-07	104.95	98.051	1686900000
TGME49_247770	_SGAIKPIGSQQFNPAGK_	mitoAPEX	3	567.309	0.090627				1685700000
TGME49_294800	_EHALLAFTLGVK_	mitoBirA	2	649.877	0.44218	6.156e-10	165.58	146.06	1685400000
TGME49_219550	_SSVPQPAPSVSPPKPAPAPK_	mitoAPEX	3	647.026	0.016873	0.00018155	81.807	79.191	1685200000
TGME49_320050	_VLATAESTELPR_	mitoAPEX	2	643.851	-0.75722	0.00016131	101.89	64.544	1684900000
TGME49_209260	_AAAFVGPFGTVEKPVLCPSVTTDR_	mitoAPEX	3	840.437	-0.032012	5.7047e-06	90.912	86.366	1683900000
TGME49_292920	_AELLEHLGTIAK_	mitoBirA	2	647.872	-1.0905	1.1643e-09	158.58	123.88	1682600000
TGME49_221320	_VSAQGTLYLDPDWR_	BirA control	2	810.904	-1.0613				1682300000
TGME49_250770	_GIYSYGFEKPSAIQQR_	mitoBirA	2	922.471	0.17912				1681700000
TGME49_306220	_TEWPDFVAQIVNDPR_	mitoBirA	2	893.942	1.4832	2.3259e-07	103.01	86.123	1680300000
TGME49_306220	_DELFAIPELSTVLR_	mitoBirA	2	801.941	0.12272	4.9863e-06	105.03	95.993	1679600000
TGME49_309752	_MPIDINQGISEPR_	mitoBirA	2	735.374	-0.33259	1.0452e-13	157.2	140.43	1678600000
TGME49_204400	_CVDALVPVGR_	mitoAPEX	2	543.292	-0.35483	0.00094243	90.15	62.669	1677400000
TGME49_232090	_PTLSYSSHASPPGMSASDGSGGLR_	mitoBirA	3	773.694	0.13794				1676200000
TGME49_320050	_VLATAESTELPR_	BirA control	2	643.851	-0.39002	6.245e-05	114.72	65.42	1674900000
TGME49_284190	_IGHPPFGFPEPLR_	mitoAPEX	3	488.598	0.14993	0.00050609	64.688	51.68	1673600000
TGME49_221320	_LQVEHPVSEGVTGVNLPAAQLQVAMGIPLWR_	mitoBirA	3	1103.93	-0.079862	9.8712e-61	200.06	196.03	1670400000
TGME49_278990	_CMLGGVLSCGLTHTAVTPLDVVK_	mitoAPEX	3	810.085	-0.70162	0.0005735	70.699	61.836	1670000000
TGME49_221320	_LFLHIVSPLNLASAK_	APEX control	2	811.985	-1.0898				1669400000
TGME49_221320	_SPGSVVNTGDVLGTLALEDPSR_	APEX control	2	1092.56	-1.0733	2.7668e-15	136.64	127.78	1669200000
TGME49_284190	_DVFFEVMGLPR_	mitoBirA	2	655.334	-1.1412	1.881e-05	139.86	129.21	1669100000
TGME49_221320	_ATLDSTGAIPR_	APEX control	2	551.299	-0.13587	6.6783e-05	122.69	96.573	1668500000
TGME49_221320	_IGMVGFLITLK_	mitoAPEX	2	596.362	-0.2774	0.00039918	94.767	69.914	1667900000
TGME49_209030	_NPGIMVGMEEK_	BirA control	2	602.789	-0.84092				1666400000
TGME49_204020	_NAALTIGNILPLNK_	mitoAPEX	2	726.433	0.16451	5.3461e-06	104.3	59.863	1665900000
TGME49_273760	_TFHPEEVSAMVLGK_	mitoBirA	3	515.597	-0.22933	9.019e-06	88.101	82.63	1665100000
TGME49_226730	_SVHVPSGEVLPVYDVAMK_	mitoAPEX	3	643.005	-0.30021	0.001112	58.712	50.598	1664700000
TGME49_221320	_NNYANVDLICQIAVQEK_	mitoAPEX	2	996.496	-0.41942	2.6799e-32	188.58	183.91	1664100000
TGME49_299070	_VTEVFADTTALSR_	mitoAPEX	2	705.367	0.35882	3.2678e-11	149.57	105.03	1663200000
TGME49_226730	_STYIHNPPFFQTMQK_	mitoAPEX	3	613.635	-0.22963	7.1767e-10	116.78	112.42	1662900000
TGME49_232940	_IAEIQAPAEIR_	BirA control	2	605.843	-0.061036	0.00016989	110.08	79.188	1661900000
TGME49_206470	_EACMACYDKPIHMA_	mitoBirA	3	566.237	-0.90436	0.00012177	73.927	69.023	1661600000
TGME49_221320	_QWAYMELGDDK_	mitoAPEX	2	678.3	-0.14341	0.001561	80.69	71.408	1660200000
TGME49_292920	_ITSQQALWLQTSATEDEHR_	mitoBirA	3	738.698	0.2151	1.4105e-52	226.44	207.51	1657500000
TGME49_292920	_FQTSETPAGELISLDK_	mitoBirA	2	868.441	-0.15419	1.8283e-07	104.88	97.75	1656500000
TGME49_320050	_VLLDVGIVR_	BirA control	2	492.316	-0.98489	0.0029026	95.502	61.249	1655100000
TGME49_215460	_SSGFAMIYDNPNAAK_	mitoAPEX	2	793.369	-0.090409	3.753e-15	154.72	150.68	1655000000
TGME49_297810	_ITFVSHPGVMAVSK_	mitoAPEX	3	491.603	-0.68227	0.0029214	53.981	40.392	1654500000
TGME49_230410	_FHSLLNNSVALR_	mitoAPEX	3	457.589	0.051122	9.0078e-13	174.4	147.69	1654200000
TGME49_244200	_GPTPAGTLDFEAYGFTK_	mitoAPEX	2	886.431	-0.43667	5.8731e-07	99.044	84.442	1653900000
TGME49_249900	_EFTGLVDCLGK_	BirA control	2	619.808	-0.073478	0.0076036	65.842	45.142	1653400000
TGME49_218560	_LSTLGGGSPEYSAVSLPAR_	BirA control	2	931.486	0.10986	6.3754e-06	98.391	90.477	1652800000
TGME49_244200	_YHLGVEFDHFDADAQR_	mitoBirA	3	640.627	-0.19534	1.3587e-07	96.247	91.489	1651200000
TGME49_239490	_VDGNDLFASLLATK_	mitoAPEX	2	732.391	-0.4591	2.8954e-06	110.35	102.98	1651200000
TGME49_221320	_QVVLLGNDITFQGGSFGVPEHLFFTQVSR_	mitoAPEX	3	1064.89	0.0006059	2.5482e-19	125.62	123.62	1650000000
TGME49_221320	_LSVSSHQGSWLHTK_	BirA control	2	783.905	-0.25882	3.8285e-22	201.06	178.96	1649700000
TGME49_294800	_NMITGTSQADVALLVVPAEAGGFEGAFSK_	BirA control	3	960.82	-0.34372	7.4139e-15	122.36	116.46	1649700000
TGME49_292920	_LFQPANEVGVSLHSR_	mitoAPEX	3	551.962	0.12391	1.2263e-09	110.97	101.94	1646000000
TGME49_250770	_LPPDVQVALFSATMPQDILELTTK_	mitoBirA	3	876.472	-0.54815	1.0202e-22	142.32	135.22	1645100000
TGME49_273760	_GVTSSQVQDLLLLDVAPLSLGLETAGGVMTK_	mitoBirA	3	1038.23	0.059178	3.8004e-22	126.8	122.84	1644700000
TGME49_288830	_LADAAQELFSK_	mitoAPEX	2	596.814	0.25246				1644200000
TGME49_221320	_IVDFSGLLDLPR_	mitoBirA	2	672.88	-1.113	3.8759e-12	174.9	111.43	1643800000
TGME49_208790	_QTSVVPLTYLQTLR_	mitoAPEX	2	809.962	0.36553	4.5785e-08	127.57	116.93	1643000000
TGME49_311720	_VLAPEEVSAMVLTK_	BirA control	2	743.913	0.04126	0.00077008	70.26	62.58	1642600000
TGME49_218560	_WLVANEQQVVK_	BirA control	2	657.364	-0.015896	0.00016736	110.39	64.035	1642300000
TGME49_306220	_YYYNAATQQSQWEKPEAMMTEEEKK_	mitoBirA	4	771.599	-0.22603	2.5676e-54	199.85	197.74	1641300000
TGME49_278990	_TVVAEEGAAGLR_	mitoAPEX	2	586.817	-0.15183	1.5974e-06	132.17	70.611	1640900000
TGME49_251780	_SQVFSTAADNQTQVGIK_	mitoAPEX	2	897.455	0.19612	4.0896e-05	84.653	77.821	1638000000
TGME49_230410	_TAPAEGGIGQLR_	mitoAPEX	2	585.317	0.088235	1.2471e-06	134.3	118.72	1638000000
TGME49_202680	_VISPQEFCTAIDAVTEADIK_	mitoBirA	3	736.368	0.075747	1.631e-15	136.96	128.49	1637400000
TGME49_221320	_(gl)QGDLTGAEAPLR_	BirA control	2	605.807	0.24767	0.00028447	84.365	72.446	1637100000
TGME49_284190	_RFYAPFEATATVK_	BirA control	2	750.896	-1.2579	0.00018638	85.287	57.605	1635100000
TGME49_288750	_ALSSALMPVWFK_	mitoBirA	2	675.368	-0.60965	1.1914e-10	171.92	127.5	1633600000
TGME49_245620	_CGLTYILNAEE_	mitoBirA	2	641.803	0.13475	5.586e-06	152.54	139.42	1633600000
TGME49_322210	_VAFYPHMLMTDAK_	mitoBirA	3	508.584	-0.32697	3.9684e-05	79.875	72.265	1632700000
TGME49_202680	_SHMPLLVPMLTGNVLFPR_	mitoAPEX	3	674.706	-0.13791	1.1921e-06	93.495	85.41	1631600000
TGME49_313140	_DLALCVK_	mitoBirA	1	818.444	-0.44168				1631500000
TGME49_263300	_SKNPEIVNTASVSPAGAFDASSK_	BirA control	3	759.717	-0.29455				1630600000
TGME49_202680	_VMEEVPEFK_	mitoBirA	2	554.273	-1.5442				1628800000
TGME49_292920	_AVFYIPEDPPSR_	mitoBirA	2	695.854	0.2906				1628100000
TGME49_207440	_ISNVFVIGK_	mitoBirA	2	488.795	0.46907	0.0032349	91.867	55.472	1627900000
TGME49_250770	_NDELTLEGIR_	mitoBirA	2	580.301	0.042861				1627700000
TGME49_221320	_QVVLLGNDITFQGGSFGVPEHLFFTQVSR_	mitoAPEX	3	1064.89	-0.195	1.1807e-20	140.26	138.31	1627100000
TGME49_284190	_QIGFPVMLK_	BirA control	1	1032.59	-0.017921	0.0021961	135.84	58.56	1625100000
TGME49_207440	_FEAGNMAMVTGGHNVGR_	mitoBirA	3	583.272	-1.3332	0.00014222	65.298	55.762	1625100000
TGME49_305520	_EYQIIDHFFQPGNCAAPLKDDVMK_	mitoBirA	4	709.841	-0.57841	0.00012656	70.679	66.623	1625000000
TGME49_220400	_(ac)ASGMGVDENCVAR_	BirA control	2	704.303	-0.83496	1.5156e-17	176.05	162.65	1623900000
TGME49_232340	_EKLQAAGNVTSATLK_	mitoBirA	3	510.954	0.11708	4.8823e-15	147.56	128.83	1623700000
TGME49_209030	_TTGIVLDSGDGVSHTVPIYEGYALPHAIMR_	mitoBirA	3	1057.2	0.28623	1.5113e-48	184	181.84	1623600000
TGME49_289690	_GIISYTDEEVVSSDFVHCK_	mitoBirA	3	729.009	0.24325				1621400000
TGME49_309820	_VLEQLTGQRPQFSK_	mitoAPEX	3	544.302	-0.12528	1.1742e-06	107.99	86.219	1621000000
TGME49_242840	_VYDMNWDISK_	mitoAPEX	2	635.792	-0.30855	0.0015356	87.184	87.184	1620800000
TGME49_250770	_DFTVSSMHGDMDQK_	mitoBirA	3	533.226	-1.3928	1.5329e-06	101.3	7.2139	1619200000
TGME49_236210	_IQLEQEIENMGAHLNAYTSR_	mitoBirA	3	773.046	-0.83562				1618900000
TGME49_310490	_LWSLVSPATLEK_	mitoBirA	2	672.382	-0.060572	7.9832e-05	111.79	94.626	1618700000
TGME49_244200	_GHEIAAVNPLSLPQETPFVSGSR_	mitoBirA	2	1203.62	0.38342	1.1649e-52	192.57	183.81	1618600000
TGME49_254030	_VYWWCSCGLSK_	mitoBirA	2	723.321	-0.7208	0.0002064	107.03	101.61	1618500000
TGME49_278990	_MQTSPAGTWPTSFSPALTK_	mitoAPEX	3	670	-0.28945	0.0010044	65.022	62.953	1617600000
TGME49_262960	_VDPAAIAAIAR_	APEX control	2	534.314	-1.01	0.0013428	82.954	60.312	1617400000
TGME49_232230	_LIIISNNCPALR_	BirA control	2	692.392	-0.11758	2.8542e-08	154.24	127.71	1615400000
TGME49_221320	_HIEVQIVGDEDGQAVALSGR_	BirA control	3	698.359	-0.14586	2.2891e-30	163.85	155.75	1615000000
TGME49_243570	_EASVYNTYTLPK_	BirA control	2	693.351	0.20226	6.4348e-05	107.09	95.628	1615000000
TGME49_232710	_GIFPLQNVFIR_	mitoBirA	2	652.38	0.02139	9.931e-05	118.71	104.78	1612600000
TGME49_288720	_GPLANTFPSAADITLPVA_	BirA control	2	877.97	-0.86832	3.3473e-06	99.055	84.453	1612200000
TGME49_244200	_YIHMGVLANPSHLEAVDPLVIGQAR_	mitoBirA	4	675.863	-0.42243	1.1071e-16	132.83	118.02	1612100000
TGME49_231410	_VNLSTATADPMGTVVQR_	mitoBirA	2	880.454	-0.20752	1.0803e-24	161.91	152.37	1611900000
TGME49_202680	_SHMPLLVPMLTGNVLFPR_	mitoBirA	3	674.706	-0.22606	1.1654e-26	172.43	164.2	1611500000
TGME49_270510	_LAALLDGGEASVEK_	mitoBirA	2	686.87	0.25979	5.5749e-06	103.83	74.771	1610300000
TGME49_221320	_DPNAGDRIDFINEDYLPIQR_	mitoAPEX	3	787.721	-0.30046	2.2327e-63	235.54	214.69	1609100000
TGME49_290600	_EQKPVVSFIAGLTAPPGR_	mitoAPEX	3	623.019	0.10479	5.509e-07	103.87	95.951	1608200000
TGME49_313140	_AESLVCDGPGDFTISFTPAGGSR_	mitoBirA	2	1171.04	-0.62303	3.8556e-10	118.05	109	1608100000
TGME49_263300	_YAVGASYTGVASK_	mitoAPEX	2	637.325	0.15129	0.00018952	78.814	69.159	1607800000
TGME49_221320	_HIEVQIVGDEDGQAVALSGR_	BirA control	3	698.359	-1.0798	2.4022e-47	190.31	173.17	1606500000
TGME49_284190	_DCDLVSSVFYPAVFDEYQQFLK_	APEX control	3	890.753	0.15264				1605000000
TGME49_259710	_AVNYEDEAVQEWR_	mitoAPEX	2	804.868	0.33412	2.4967e-21	192.18	155.23	1604800000
TGME49_228470	_INWLCKPVMK_	BirA control	3	430.235	-0.3512	0.0029998	70.552	54.922	1603000000
TGME49_299070	_LATLRPTAPVLAVTECVHTAR_	mitoBirA	4	569.819	-0.27892	4.7522e-10	111.45	101.3	1602700000
TGME49_289690	_GIISYTDEEVVSSDFVHCK_	mitoBirA	3	729.009	-0.20283	2.0114e-06	94.281	89.867	1602600000
TGME49_262670	_ALPSNIQIIR_	BirA control	2	562.843	-0.028206	0.0028215	80.755	48.34	1602000000
TGME49_247550	_TLTHELELVEGLK_	mitoAPEX	3	494.612	-1.0117	9.6791e-20	189.3	158.57	1601700000
TGME49_284190	_GTNAVGYTACPDNSVEAFCR_	mitoAPEX	3	730.318	-0.5022				1601600000
TGME49_221320	_DILSSLPESERR_	BirA control	3	467.916	0.11445	3.5626e-05	102.4	61.904	1601600000
TGME49_262640	_RFTIEWMEASK_	mitoBirA	2	699.348	1.0039				1601500000
TGME49_273760	_AIQEALDWLDKNQLAEKEEFEAK_	mitoBirA	3	906.792	0.17014				1601200000
TGME49_294800	_AGMVLTFAPVGLTTECK_	mitoBirA	3	598.976	-0.59295	7.8387e-11	110.35	98.704	1598700000
TGME49_288500	_NNSQTIHCGDIETNYTVEK_	mitoAPEX	3	741.671	-0.26971	6.634e-10	111.65	104.61	1596900000
TGME49_244200	_SQMFENFCGQK_	mitoAPEX	2	688.292	-0.51789	3.5314e-05	131.83	128.95	1596600000
TGME49_215590	_VIDHEYDAIVVGAGGAGLR_	mitoAPEX	3	638.002	0.12755	3.5223e-05	89.358	82.742	1595500000
TGME49_261950	_EGNDLYHEMMTTGVIK_	mitoBirA	2	919.427	-0.65001	3.5162e-15	152.37	141	1595500000
TGME49_284190	_LDGAIGASGAVVQPYYDSLLVK_	APEX control	2	1118.6	-0.15782	4.2934e-30	158.33	145.86	1594600000
TGME49_204020	_LRPLDFAER_	BirA control	2	558.812	0.012199				1594300000
TGME49_284190	_RFYAPFEATATVK_	mitoAPEX	3	500.933	-0.00030759	1.7467e-05	88.075	81.018	1594000000
TGME49_209030	_AVFPSIVGKPK_	BirA control	3	381.569	-0.069349	0.0029344	63.624	49.815	1593300000
TGME49_294800	_SVEMHHEVMEQAVPGDNVGFNVK_	mitoBirA	2	1277.1	-0.71389	5.3124e-15	126.97	115.99	1593100000
TGME49_245620	_CGLTYILNAEE_	BirA control	1	1282.6	0.024124				1592900000
TGME49_247550	_TALSDAASVASLMTTTEAAVVEAK_	mitoAPEX	2	1169.1	-0.58422	7.6004e-75	222.51	214.04	1590500000
TGME49_245460	_NSIVAIDATPFK_	mitoAPEX	2	638.351	0.61095				1590000000
TGME49_292130	_VVVIDCQGHLLGR_	mitoBirA	3	489.27	-0.43785	7.2875e-07	117.79	109.93	1589900000
TGME49_309820	_VLEQLTGQRPQFSK_	BirA control	2	815.949	0.17439	1.0122e-10	146.96	121.51	1589200000
TGME49_221320	_QWAYMELGDDK_	mitoAPEX	2	678.3	-0.051315	0.0018517	77.674	68.392	1588800000
TGME49_226730	_VDLIEAYTK_	mitoBirA	2	526.287	0.1101	0.0090317	76.228	45.664	1588700000
TGME49_218560	_AVAAFGLDEEPAAR_	BirA control	2	708.86	-0.88044	3.6968e-14	160.38	124.06	1588600000
TGME49_289690	_SSDVIVSNASCTTNCLAPLAK_	mitoBirA	2	1104.54	-0.31365	1.6922e-39	186.56	166.98	1588600000
TGME49_236210	_MVVAAAGDVDHKELTALVEK_	mitoBirA	4	524.782	-0.18252	6.7653e-10	111.57	105.3	1587500000
TGME49_237010	_GAPDVVEPLLNR_	mitoAPEX	2	640.354	-0.35953	0.00069839	81.709	65.047	1586000000
TGME49_209260	_WPAGHQAYSELFLEGK_	mitoBirA	2	916.952	0.4238	1.2736e-29	201.4	189.9	1585900000
TGME49_261950	_AALVYGQMNEPPGAR_	mitoAPEX	2	787.393	-0.27104	1.7909e-14	145.43	138.06	1585600000
TGME49_311720	_DKDLLPYEIINK_	mitoBirA	2	730.903	-0.13903				1585600000
TGME49_204400	_GTALTELLK_	mitoAPEX	2	473.284	0.25866	0.0073537	80.755	52.546	1584800000
TGME49_249900	_GAYFGLFDTAK_	mitoAPEX	2	595.298	0.20179	0.0013305	83.081	51.66	1584300000
TGME49_311720	_VLAPEEVSAMVLTK_	mitoAPEX	2	743.913	0.27239	7.0134e-05	83.692	71.423	1583900000
TGME49_259710	_AVNYEDEAVQEWR_	mitoBirA	2	804.868	-1.0906	8.2698e-27	212.1	171.73	1583900000
TGME49_248340	_YIPTLGVEVHPLK_	mitoBirA	3	489.285	-0.76964	0.0015294	58.32	45.312	1583600000
TGME49_313140	_LIDDMVAQALK_	mitoBirA	2	608.834	-0.21334	0.00027709	102.53	81.754	1583500000
TGME49_221320	_DILSSLPESERR_	BirA control	2	701.37	0.4937	4.0388e-06	130.56	69.219	1582800000
TGME49_226590	_MNVWGNHDLLMK_	mitoBirA	2	729.355	-1.1085				1582200000
TGME49_306670	_HLMLNPDICVR_	mitoBirA	2	684.35	-0.12798				1582000000
TGME49_268830	_ALDFLPVDVEHHGEEYTQK_	mitoBirA	3	743.027	1.3858	0.00011221	82.367	76.553	1582000000
TGME49_310490	_LWSLVSPATLEK_	mitoBirA	2	672.382	-1.015	0.0001262	105.65	84.617	1581300000
TGME49_247550	_VELEKPFVLLYDK_	mitoAPEX	2	796.95	0.13229	3.0501e-07	133.48	124.59	1578200000
TGME49_221320	_VDDVLKELDK_	BirA control	3	391.884	0.015184	0.0011005	78.342	62.712	1577900000
TGME49_260180	_(ac)AFAGAAAPLGVK_	mitoBirA	2	557.816	0.15965	0.0023613	69.721	53.523	1575600000
TGME49_202680	_VISPQEFCTAIDAVTEADIK_	mitoAPEX	3	736.368	0.016284	2.2422e-06	92.932	87.118	1574500000
TGME49_232300	_RGPANPLPDTIIVMDPKPEIPVVQPEEMDEGVLGPM_	BirA control	3	1294.32	-0.22551	5.8372e-13	85.044	83.638	1574200000
TGME49_263300	_YAVGASYTGVASK_	BirA control	2	637.325	0.53326	2.0302e-05	96.464	80.835	1574000000
TGME49_292920	_SGSLEFLMK_	mitoAPEX	2	506.263	0.2145	0.0029953	93.598	73.077	1573700000
TGME49_219550	_KPASPVVAVQSPGREEK_	mitoBirA	4	445.499	-0.21233	9.1665e-08	103.13	92.517	1572900000
TGME49_204400	_HCVIIYDDLSK_	mitoBirA	2	681.84	0.26284	0.00021203	106.67	88.594	1572300000
TGME49_221320	_VTAENPDEGFKPTSGR_	mitoAPEX	3	568.944	0.02249	3.6417e-10	119.46	99.789	1571500000
TGME49_232300	_GLCAMAQAESLR_	mitoAPEX	2	653.816	-0.44125	1.8826e-06	130.44	113.22	1571000000
TGME49_232300	_RGPANPLPDTIIVMDPKPEIPVVQPEEMDEGVLGPM_	BirA control	3	1294.32	-0.51583	3.0718e-08	64.885	60.647	1570400000
TGME49_284190	_YLATVIVNGPLTPLVNADACPDK_	APEX control	2	1221.14	-0.76167				1569800000
TGME49_235880	_GAAEASVLASSWDYVK_	mitoBirA	2	827.41	-0.34349	1.8002e-07	104.94	86.977	1569500000
TGME49_310360	_ATHALQPTGTGSVAFTRPGQGSNAQFQTSLADK_	mitoBirA	4	836.921	-0.21402	2.3528e-39	169.73	162.74	1569100000
TGME49_207440	_HLGGFDIIHLR_	BirA control	3	426.575	-0.034392	2.7699e-05	115.78	109.48	1569000000
TGME49_313140	_DIFQSYYDEQFKPLFEK_	mitoBirA	3	733.021	-0.19616				1567700000
TGME49_277720	_INPLLPLEQR_	mitoAPEX	2	596.856	-0.09737				1567700000
TGME49_309752	_LNFDDNAGFR_	mitoAPEX	2	584.773	0.43556	0.0021959	83.883	66.144	1567300000
TGME49_312090	_VTLGLPVGALINCCDNSGAK_	mitoAPEX	2	1030.02	-0.42702	2.2327e-54	208.4	205.07	1567200000
TGME49_261570	_NCPVLAIDNVR_	BirA control	2	635.832	-0.62027				1566900000
TGME49_215590	_GSDWLGDQDAIQHMCR_	mitoBirA	3	630.274	-0.63812	7.2882e-10	108.63	104.29	1566500000
TGME49_313140	_IHVANPVVEMDGDEMTR_	mitoAPEX	2	956.948	-0.38019	1.2118e-19	150.91	144.63	1566100000
TGME49_286530	_QFHPEGLEAQAPRPHQGLDMR_	mitoBirA	5	483.641	-0.21676	0.0017137	54.668	50.142	1565700000
TGME49_259710	_FTCVTSLDAK_	mitoAPEX	2	571.282	0.52629	0.00031997	103.31	82.34	1564200000
TGME49_206470	_VVSTLTQGIEHLFR_	mitoBirA	3	533.967	0.40833	3.6368e-12	148.62	128.49	1564000000
TGME49_247550	_AMLHDIAVMTGGQVVTEETGGSLEDAHQMPQMLGR_	mitoAPEX	4	928.191	-0.35147	6.4387e-44	166.74	164.53	1563500000
TGME49_209030	_NPGIMVGMEEK_	BirA control	2	602.789	-0.72039	0.00013202	114.71	99.124	1563400000
TGME49_259710	_AVNYEDEAVQEWR_	mitoBirA	2	804.868	0.071411	2.8894e-21	190.03	153.09	1563300000
TGME49_284190	_LGIDAAGAAGGVVEAAMAYTGNVADPDR_	BirA control	3	878.094	-0.22746	7.6983e-26	152.88	149.33	1562700000
TGME49_232710	_GIFPLQNVFIR_	mitoBirA	2	652.38	0.05419	0.00011724	116.52	104.51	1562600000
TGME49_206470	_VIISSTGALALDK_	mitoAPEX	2	644.38	0.40342	1.6584e-05	99.941	58.542	1562100000
TGME49_244320	_AIVGLSLEDIKR_	BirA control	3	438.598	-0.11399	3.8748e-05	100.93	84.793	1561600000
TGME49_239100	_IVKPQGVEPTEIENEVAK_	BirA control	3	660.693	0.23253	3.6819e-05	88.565	77.704	1561200000
TGME49_209030	_EEYDESGPSIVHR_	BirA control	3	506.567	0.33262				1560600000
TGME49_292920	_AELLEHLGTIAK_	mitoBirA	3	432.25	-0.16047				1559500000
TGME49_221320	_DILSSLPESER_	mitoBirA	2	623.32	0.16891	4.9738e-05	101.35	73.172	1558800000
TGME49_259710	_AVNYEDEAVQEWR_	mitoBirA	2	804.868	0.24223	3.8017e-27	217.46	180.51	1558100000
TGME49_235470	_IQNAIMAANPVLEAFGNAK_	mitoBirA	2	986.52	0.046107				1558000000
TGME49_229920	_LADDTPSLQPFMYK_	mitoBirA	2	813.398	0.20066				1557700000
TGME49_226970	_DVGLGFQTPR_	APEX control	2	545.288	-0.87653	0.00022097	113.44	72.328	1557600000
TGME49_232090	_HSQVALLDISETQLQR_	mitoBirA	3	613.33	-1.0089	5.0839e-12	131.61	125.13	1555600000
TGME49_261570	_NCPVLAIDNVR_	mitoAPEX	2	635.832	-1.4994	0.0099769	61.48	51.593	1555200000
TGME49_309752	_EVGFDKPVVLR_	mitoAPEX	2	629.861	-0.4325				1555100000
TGME49_284190	_RFYAPFEATATVK_	APEX control	3	500.933	-0.97621	4.3224e-06	97.69	88.153	1554800000
TGME49_251780	_RQEITIQSSGGLSDSQIEQMVK_	mitoBirA	3	812.08	0.25336	4.3249e-56	210.64	192.47	1554400000
TGME49_221320	_NVCLFALTTPMDFGTEEEK_	mitoAPEX	2	1101.51	0.0088743	3.9721e-32	180.62	162.73	1554300000
TGME49_221510	_VLHVMDSQLVK_	mitoAPEX	3	423.573	-0.19712	2.1283e-05	119.27	100.94	1553000000
TGME49_251780	_SDLSDVILVGGMTR_	mitoAPEX	2	731.882	-1.6606	8.3076e-05	81.789	47.74	1552200000
TGME49_221320	_IRDILSSLPESERR_	BirA control	3	557.644	0.13729	5.7813e-05	80.507	68.087	1550800000
TGME49_244320	_AIVGLSLEDIKR_	mitoBirA	3	438.598	-0.093943	7.3616e-05	90.614	78.345	1550000000
TGME49_270510	_DAAAAAAEPLIPLTK_	BirA control	2	726.409	-0.031176	2.1164e-09	119.54	112.71	1549700000
TGME49_254620	_QNRPIPPWIR_	BirA control	3	426.247	-0.94828	0.00011443	101.9	86.306	1549300000
TGME49_232090	_ATFCIEAALENATIK_	mitoBirA	2	826.422	-0.20991	2.3727e-19	160.5	154.22	1548900000
TGME49_220400	_IQFVLWCPDNAPVKPR_	BirA control	3	647.345	0.1578	1.172e-07	101.42	93.336	1548700000
TGME49_260170	_GVQPLLDAVCR_	mitoBirA	2	614.329	-0.17894	0.0001856	108.35	93.034	1548000000
TGME49_294800	_NMITGTSQADVALLVVPAEAGGFEGAFSK_	mitoBirA	3	960.82	0.64735				1547900000
TGME49_268890	_ILGLPIERPK_	mitoAPEX	3	379.245	-0.056088	9.1783e-05	105.98	68.631	1547700000
TGME49_284190	_RFYAPFEATATVK_	mitoAPEX	2	750.896	-0.15542	0.00012991	89.46	60.557	1547600000
TGME49_284190	_DVFFEVMGLPR_	mitoBirA	2	655.334	0.30661	2.2844e-05	137.89	122.73	1545300000
TGME49_221320	_KPVSQAQAPQNVFVR_	mitoBirA	3	556.978	-0.92845	4.4711e-09	108.23	98.95	1544800000
TGME49_263530	_TGEFIPPCVQVGQTVVVPEYGGMK_	mitoBirA	2	1296.65	-0.33868	4.185e-10	112.26	108.26	1544800000
TGME49_249900	_EFTGLVDCLGK_	BirA control	2	619.808	-1.2104	0.00042907	92.866	56.309	1544500000
TGME49_247550	_TLTHELELVEGLK_	mitoAPEX	2	741.414	0.15664	1.026e-13	157.5	121.18	1543300000
TGME49_248340	_LILVGDGGVGK_	mitoBirA	2	514.311	0.16878				1542600000
TGME49_299070	_LTRPILTVCTLESGR_	mitoAPEX	3	572.654	-0.29247	1.3684e-11	132.81	122.67	1542500000
TGME49_314400	_STWGAVGHGGLYHSQSPEAYFAHASGLK_	mitoAPEX	4	729.602	-0.24163	3.3003e-26	155.09	150.08	1542300000
TGME49_236210	_ELTALVEK_	mitoAPEX	2	451.763	0.36164				1541800000
TGME49_221320	_IVDFSGLLDLPR_	mitoAPEX	2	672.88	-1.3523	1.9379e-06	130.1	81.531	1541100000
TGME49_273760	_VIAGPGDKPLIEVTYQGEK_	BirA control	3	672.033	0.37717	0.00012004	85.203	78.071	1540600000
TGME49_250770	_DFTVSSMHGDMDQK_	mitoBirA	2	799.335	-0.69244	2.3367e-11	144.8	6.2538	1540500000
TGME49_311720	_NAVVTVPAYFNDAQR_	mitoBirA	2	832.923	0.079244				1540500000
TGME49_299070	_LPISALSAR_	mitoBirA	2	464.285	0.18403	0.0073537	80.755	16.043	1540300000
TGME49_232230	_VSCLAVTDPGDSDIIR_	BirA control	2	859.425	-0.08696				1539200000
TGME49_294800	_NMITGTSQADVALLVVPAEAGGFEGAFSK_	mitoBirA	3	960.82	-0.093651	1.8814e-14	118.67	114.38	1538800000
TGME49_206470	_NLGLEELGIETDR_	mitoAPEX	2	729.875	0.46835	8.7201e-09	139.86	108.38	1538500000
TGME49_235470	_DLGNTTLDWIVR_	mitoBirA	2	701.87	0.30652	7.9832e-05	111.79	82.05	1537200000
TGME49_251780	_SQVFSTAADNQTQVGIK_	mitoBirA	2	897.455	0.3791	4.3427e-11	122.97	112.6	1536300000
TGME49_232230	_VSCLAVTDPGDSDIIR_	mitoAPEX	2	859.425	0.098087	1.8198e-09	115.8	104.69	1535300000
TGME49_262640	_FTIEWMEASK_	mitoBirA	2	621.297	-0.25948	0.00026484	106.62	97.296	1535300000
TGME49_206470	_GTLGGTCLNVGCIPSK_	mitoAPEX	2	817.405	-0.70581	2.4612e-09	112.57	104.32	1534700000
TGME49_251780	_ILQHLIDEFKK_	mitoBirA	3	461.938	0.18616	9.5939e-05	93.345	61.186	1533600000
TGME49_319920	_VPQLNIGDEYDITELTK_	mitoBirA	3	650.002	-0.1353	2.0312e-11	121.03	116.55	1532700000
TGME49_288830	_NYFTFTPLLPSVCAGTLSPLSCIEPVR_	mitoAPEX	3	1013.85	-0.23455	5.8733e-06	70.112	65.807	1532300000
TGME49_284190	_VVGDFAQFLVQNK_	BirA control	3	488.933	-0.62958	1.948e-06	107.34	102.2	1531600000
TGME49_268830	_TFYTNQVQILDR_	mitoBirA	2	749.388	-1.0102	4.2516e-10	168.02	139.11	1529700000
TGME49_292920	_ITSQQALWLQTSATEDEHR_	mitoBirA	3	738.698	0.09377	1.1108e-32	178.43	171.01	1529400000
TGME49_284190	_ANVQAVPGTNEPVTDFEEAAAFCR_	APEX control	3	865.071	-1.0256	3.029e-16	134.87	129.04	1529200000
TGME49_273760	_AIQEALDWLDKNQLAEKEEFEAK_	mitoBirA	3	906.792	0.4415	1.2386e-09	108.55	94.214	1528600000
TGME49_292130	_LGDLSSQVGWSHGDLVAR_	BirA control	3	632.99	0.018138	6.7569e-07	100.02	88.104	1528100000
TGME49_248480	_VFQGTALLR_	BirA control	2	502.798	-0.0094253	0.0024148	105.52	34.141	1527900000
TGME49_289690	_VPVPDVSVVDLTCK_	APEX control	2	764.408	-0.047819	8.5489e-06	97.797	89.201	1526500000
TGME49_306650	_VIEEEAQPFAHNQNVQASLK_	mitoBirA	3	751.382	-0.91886	3.6914e-10	117.48	106.5	1525300000
TGME49_204020	_MPEGTVVSNVEEK_	mitoAPEX	2	709.845	0.10179	3.3726e-11	149.32	123.62	1524800000
TGME49_290840	_APASLLQPLADIFAK_	mitoAPEX	2	777.948	0.18677	4.1908e-11	132.65	97.61	1524500000
TGME49_245680	_TGIVFNVTQR_	BirA control	2	567.817	0.042558	0.0015356	87.184	58.226	1524100000
TGME49_268830	_TFYTNQVQILDR_	mitoBirA	2	749.388	-0.02576	4.2516e-10	168.02	145.96	1522800000
TGME49_204400	_HCVIIYDDLSK_	mitoBirA	2	681.84	-1.3263	4.7346e-05	125.97	95.634	1522800000
TGME49_284190	_AEELSFPSSVVEFLQGR_	APEX control	3	632.323	-0.96246	4.89e-16	134.14	125.57	1522000000
TGME49_261570	_NCPVLAIDNVR_	mitoBirA	2	635.832	-1.5372	0.00088846	87.667	75.936	1520900000
TGME49_288750	_ALSSALMPVWFK_	mitoBirA	2	675.368	-1.7098				1520800000
TGME49_250770	_KLPPDVQVALFSATMPQDILELTTK_	mitoBirA	3	919.17	0.0168				1520500000
TGME49_222910	_VPSPTSKPSSPDETSQAAEEASSSTCEATQK_	mitoAPEX	3	1065.48	-0.40206	2.115e-12	107.15	105.48	1520500000
TGME49_320050	_NKIEADDIEAMYK_	mitoBirA	2	770.372	-0.24877				1520300000
TGME49_218560	_PASTGSVGPAPNQLCTPTAVVHR_	BirA control	3	773.062	-0.055275	2.3625e-31	166.27	160.45	1519000000
TGME49_221320	_VDAVWPGWGHASENPNLPR_	BirA control	2	1051.51	-0.1965	2.8764e-20	149.12	137.91	1519000000
TGME49_221320	_DIFDQATVK_	mitoBirA	1	1036.53	0.11966				1518900000
TGME49_208790	_TQDLPIGIK_	mitoAPEX	2	492.79	0.16441				1518700000
TGME49_284190	_IMNVASEGAPR_	APEX control	2	572.793	-1.0861				1517900000
TGME49_221320	_RLSELGITFIGPSATVMAALGDK_	BirA control	3	783.095	-0.12757	2.1168e-10	108.57	98.226	1516600000
TGME49_284190	_LQVEHTVSEEVTGVDLVK_	BirA control	2	991.526	-1.0249	1.7433e-37	191.78	172.48	1515600000
TGME49_309752	_EVGFDKPVVLR_	mitoBirA	3	420.243	-0.31329				1515500000
TGME49_221320	_EIPVAFWSFR_	mitoAPEX	2	626.33	0.15645				1514800000
TGME49_221320	_NVCLFALTTPMDFGTEEEK_	mitoBirA	2	1101.51	-0.31087	7.1176e-52	224.86	201.64	1514300000
TGME49_260180	_(ac)AFAGAAAPLGVK_	mitoBirA	2	557.816	-0.71947	0.00068702	77.744	61.073	1513000000
TGME49_311720	_ITPSYVAFTDDDRK_	mitoAPEX	3	543.27	-0.41231	0.000276	66.246	51.814	1512300000
TGME49_209030	_GYGFTTSAEK_	BirA control	2	530.751	-0.04654	0.00064524	91.636	80.043	1512200000
TGME49_286530	_(gl)QFHPEGLEAQAPRPHQGLDMR_	mitoBirA	4	600.043	-0.62937				1511000000
TGME49_206470	_VIISSTGALALDK_	mitoBirA	2	644.38	-0.37522	0.00020216	77.776	64.969	1509700000
TGME49_313140	_LSNSNWEHYAASEHNSSVDDHDDNQR_	mitoBirA	5	606.256	-0.073741	7.877e-14	123.65	122.57	1509500000
TGME49_261950	_VALTALSVAEYFR_	mitoBirA	2	720.398	0.59065	8.4001e-14	160.38	56.135	1508600000
TGME49_226730	_VYEHITEGTPAWNALK_	mitoAPEX	3	610.312	0.30415	1.4665e-07	95.264	89.55	1507400000
TGME49_273760	_GVTSSQVQDLLLLDVAPLSLGLETAGGVMTK_	mitoBirA	3	1038.23	-0.22919	5.4014e-23	138.96	130.8	1507200000
TGME49_215460	_VSDSQSIVVFGLK_	mitoBirA	2	689.882	0.22383	9.9566e-34	223.22	191.74	1506900000
TGME49_249900	_GAWANVLR_	BirA control	2	443.748	0.12919				1506700000
TGME49_265370	_TVGVHLPYTGR_	mitoBirA	2	600.33	-0.90707	0.0086556	63.908	50.817	1506200000
TGME49_297810	_AQIAVDNNIPVNFQSLDYFDR_	mitoBirA	2	1220.1	-1.0696	6.9947e-39	177.03	169.45	1506200000
TGME49_221320	_LAAVHVPQVNK_	BirA control	2	588.348	0.51459	0.0013086	83.309	73.759	1506100000
TGME49_226730	_NCDGFSIKPEDVQTILDWQK_	mitoBirA	3	798.386	-0.066476	2.6954e-47	194.08	190.55	1506100000
TGME49_204020	_GAPLAEVSFR_	BirA control	2	523.785	-0.85253	0.0049679	74.841	55.747	1505800000
TGME49_236210	_IQLEQEIENMGAHLNAYTSR_	mitoBirA	3	773.046	-0.92333				1505100000
TGME49_254620	_(gl)QNRPIPPWIR_	BirA control	2	630.354	-0.68665	0.00017137	99.815	69.203	1504000000
TGME49_292130	_LGDLSSQVGWSHGDLVAR_	mitoAPEX	3	632.99	-0.073764	3.8612e-15	125.45	115.76	1503600000
TGME49_202680	_GNVYEGIPLDQSILEPADLR_	mitoAPEX	3	733.715	0.28658	7.1519e-17	140.8	130.66	1503100000
TGME49_305520	_SPYQEWSDYLAR_	mitoBirA	2	757.849	0.13043	2.4681e-12	180.24	172.89	1502500000
TGME49_294800	_NMITGTSQADVALLVVPAEAGGFEGAFSK_	mitoBirA	3	960.82	0.20599	8.9315e-09	85.937	83.11	1502500000
TGME49_284190	_LLLCDTTLR_	mitoAPEX	2	552.808	-1.6859				1502400000
TGME49_299070	_GLGDIESVSHTASPGSSVVR_	mitoBirA	3	652.332	0.31682	6.9799e-22	147.06	147.06	1501500000
TGME49_292920	_LFQPANEVGVSLHSR_	mitoBirA	3	551.962	-0.023995	5.5561e-08	102.65	89.857	1500800000
TGME49_251780	_QAVITVPAYFNDSQR_	mitoAPEX	2	854.936	-1.2605	7.1467e-11	126.77	108.75	1500200000
TGME49_245460	_SFYGLDLGK_	BirA control	2	500.261	-0.68206				1500000000
TGME49_244320	_AIVGLSLEDIKR_	BirA control	3	438.598	-0.2109	0.00024136	75.739	64.101	1499700000
TGME49_290030	_VSTPGTLEVHTSPALQQQPHFHEEAAGHH_	mitoBirA	4	786.383	0.29835	3.9499e-07	71.297	68.399	1499500000
TGME49_226970	_NVTCHLSPCFEQVK_	mitoBirA	2	859.903	-0.087077	3.2147e-15	172.26	154.84	1499400000
TGME49_262960	_KVDVLTEQGDHDAAANLGEVVASLQVK_	BirA control	4	702.37	-0.37175	1.8859e-07	83.236	75.663	1499100000
TGME49_284560	_ATNVKDEIALTGTDVELVSR_	mitoBirA	3	711.046	0.41684	1.181e-15	139.02	130.73	1498500000
TGME49_245680	_TGIVFNVTQR_	mitoBirA	2	567.817	-0.69798	0.00046241	94.767	65.809	1497400000
TGME49_203220	_PLLDVSSLISPLVLVATDVAAR_	mitoBirA	3	750.442	-0.15399				1497300000
TGME49_221320	_KPVSQAQAPQNVFVR_	mitoBirA	3	556.978	-0.010406	4.8466e-06	84.859	70.428	1495300000
TGME49_294800	_THINLVVIGHVDSGK_	mitoAPEX	3	530.298	0.28785	5.1854e-06	84.213	79.309	1493900000
TGME49_312160	_PRPTQYQTEICNQATNVQPGVEK_	mitoBirA	3	886.77	-0.40596	1e-84	246.77	233.41	1493500000
TGME49_229920	_GDFTYDDYEEMFYK_	mitoAPEX	2	911.861	-0.15106	2.9963e-06	109.83	109.75	1493400000
TGME49_313140	_LGQFCLALEHACIQTVENGAMPK_	mitoBirA	3	863.087	-2.0974				1491900000
TGME49_273760	_TFHPEEVSAMVLGK_	mitoBirA	3	515.597	-1.1855				1490900000
TGME49_263300	_DSLDIVAEYK_	BirA control	2	576.793	0.3706	0.00036054	100.88	42.18	1490600000
TGME49_288500	_MALAVGDTECEFMEK_	mitoAPEX	2	865.875	-0.75979	4.0273e-09	114.64	101.22	1490300000
TGME49_245680	_KGDYVDIVCDPSVQK_	BirA control	3	574.95	-0.25814	6.6679e-08	101.53	94.396	1490100000
TGME49_316330	_IVLEQTHDANTPITDTMK_	mitoAPEX	3	676.342	0.2442	3.0378e-05	87.676	68.741	1490100000
TGME49_221320	_GFPIDALHTELFEVETQDGSKK_	BirA control	3	821.08	-0.2087	4.1189e-05	85.805	81.381	1489900000
TGME49_313140	_AESLVCDGPGDFTISFTPAGGSR_	mitoAPEX	2	1171.04	-0.032491	1.2966e-84	251.12	230.18	1489700000
TGME49_284190	_AEELSFPSSVVEFLQGR_	mitoBirA	2	947.981	0.19254	3.4004e-15	130.29	115.72	1488600000
TGME49_294800	_STNMSWYK_	BirA control	2	508.729	-0.11164				1488300000
TGME49_219550	_FEANAGDTVEVGKPLYVIDPTAQPDPAELAAAAAAAAAPATPVK_	mitoAPEX	4	1073.05	-0.23349	8.7653e-09	59.673	59.237	1488200000
TGME49_221320	_LRVDQIEVK_	mitoBirA	3	367.221	0.26479	0.003845	74.376	34.528	1488100000
TGME49_221320	_IKVEWNDASNPSLGFK_	mitoAPEX	3	602.312	0.061432	8.8159e-12	130.02	116.44	1487400000
TGME49_284190	_FVSYQNAGTVEFLVEGDR_	BirA control	2	1015.99	0.43298	5.6869e-34	189.56	174.29	1487000000
TGME49_229250	_VSSELLWQCVR_	BirA control	2	688.853	0.049301	7.9261e-12	195.51	179.54	1486900000
TGME49_221320	_LAFPSVDSR_	APEX control	2	496.264	-0.62437	0.0079492	79.148	59.371	1485900000
TGME49_297810	_DIITDYLVGGK_	mitoAPEX	2	597.324	0.080995	0.0067639	67.385	28.51	1485500000
TGME49_274060	_AVAGLAAGGLGSFFGNPADLALIR_	mitoAPEX	3	753.415	0.57598	1.9122e-16	137.12	133.25	1485200000
TGME49_206470	_VVSTLTQGIEHLFR_	mitoAPEX	3	533.967	-0.24295	4.3941e-07	115.12	80.855	1485200000
TGME49_204400	_IVDVPIGPGLLGR_	mitoBirA	2	653.398	0.35485	9.8304e-06	106.26	74.779	1484300000
TGME49_244560	_ELISNAVDALEK_	BirA control	2	651.351	0.023275	7.1243e-05	113.24	49.813	1484200000
TGME49_259710	_FTCVTSLDAK_	mitoBirA	2	571.282	0.047532				1484100000
TGME49_322210	_EVAAGWEFR_	mitoBirA	2	532.762	-1.2469				1483900000
TGME49_254030	_VWQEWWPYDPQPQPQTTNPYLVHCEK_	mitoBirA	3	1109.52	0.01864	4.8245e-09	93.949	92.095	1482900000
TGME49_221320	_IKVEWNDASNPSLGFK_	mitoBirA	3	602.312	-1.0129	3.8692e-06	89.502	84.29	1482500000
TGME49_221320	_IKVEWNDASNPSLGFK_	BirA control	2	902.965	0.32848	1.3555e-10	130.27	116.52	1482200000
TGME49_289690	_SSDVIVSNASCTTNCLAPLAK_	mitoBirA	2	1104.54	-1.1504				1481800000
TGME49_244560	_FTALSHPEVLEPK_	BirA control	3	489.933	0.27661	0.0032995	54.898	40.99	1481700000
TGME49_310470	_EGVFYGQCSELCGALHGFMPIVIEAVSPETYAAHAK_	mitoBirA	4	985.469	-1.3252				1481600000
TGME49_221320	_IKVEWNDASNPSLGFK_	mitoBirA	3	602.312	0.23117	1.3879e-05	81.594	72.559	1481500000
TGME49_284190	_DCDLVSSVFYPAVFDEYQQFLK_	mitoBirA	2	1335.63	0.011602	9.3509e-10	114.55	110.01	1480800000
TGME49_202680	_TVASPVYTGGDVR_	mitoBirA	2	661.341	-0.104	4.1492e-07	124.12	98.777	1479800000
TGME49_245680	_TGIVFNVTQR_	mitoAPEX	2	567.817	0.25918	0.00038714	99.283	68.719	1479100000
TGME49_244200	_SVVWAQEEPMNQGAWFYTSK_	mitoBirA	2	1179.55	-0.23816	9.7698e-47	191.65	186.14	1478400000
TGME49_231410	_AATPEELVELK_	mitoBirA	2	600.33	-1.2762	0.00037618	96.229	76.571	1477400000
TGME49_297810	_AQIAVDNNIPVNFQSLDYFDR_	mitoBirA	2	1220.1	-1.1571	2.9203e-22	155.71	146.14	1477100000
TGME49_204020	_LRPLDFAER_	mitoBirA	2	558.812	0.30535				1477000000
TGME49_230410	_KFHSLLNNSVALR_	mitoAPEX	3	500.288	-0.27212	5.9356e-07	119.21	69.969	1476300000
TGME49_206480	_ATGPQFDILDPK_	mitoAPEX	2	651.34	2.7483	0.00019526	98.253	74.499	1476200000
TGME49_243570	_EASVYNTYTLPK_	mitoBirA	2	693.351	0.28412	2.3212e-06	107.97	95.011	1475900000
TGME49_306650	_AEDVAAHDFPQLLHR_	mitoAPEX	3	573.625	0.18651	8.4872e-12	133.47	123.93	1475600000
TGME49_289690	_GIISYTDEEVVSSDFVHCK_	mitoBirA	3	729.009	-0.99887	7.9831e-07	102.89	97.768	1475500000
TGME49_288500	_NNSQTIHCGDIETNYTVEK_	mitoBirA	3	741.671	-1.3427				1473700000
TGME49_221320	_RLIFENEVK_	mitoAPEX	2	574.327	-0.037645				1473600000
TGME49_209260	_WPAGHQAYSELFLEGK_	mitoBirA	2	916.952	0.14759	3.5178e-29	193.64	193.64	1473100000
TGME49_292130	_LGDLSSQVGWSHGDLVAR_	mitoBirA	3	632.99	-1.2469	3.7205e-10	111.77	101.39	1472400000
TGME49_244200	_ILQLCDDREDVIHHENWELEK_	mitoBirA	3	897.766	0.11683	1.1638e-47	196.43	173.5	1472200000
TGME49_206470	_VVSTLTQGIEHLFR_	mitoBirA	3	533.967	0.087643	4.2099e-12	147.26	127.58	1471900000
TGME49_292130	_DQVAFLQQYGHA_	mitoAPEX	2	688.833	0.54193	0.00081096	79.036	66.273	1471600000
TGME49_218560	_AQLQPLFDCLR_	BirA control	2	680.856	-0.26232				1471300000
TGME49_313390	_VDISGVDVSSIKDEQFGASK_	mitoAPEX	3	694.351	0.26025	6.5866e-15	130.05	103.28	1470700000
TGME49_294800	_GITIDIALWQFETPK_	BirA control	2	866.469	0.41206	3.392e-24	184.76	146.39	1469700000
TGME49_313140	_SEGGFVWACK_	mitoBirA	2	570.761	-0.064062	0.00037759	99.855	92.911	1468800000
TGME49_306220	_(gl)QLEEEKEEWPK_	mitoBirA	2	714.338	0.25093				1466900000
TGME49_232230	_VSCLAVTDPGDSDIIR_	mitoBirA	2	859.425	0.12774	1.7807e-09	116	106.72	1465500000
TGME49_299070	_SFILDSSTQPGDASR_	mitoBirA	2	790.881	-0.041726	3.5226e-25	189.1	177.04	1465400000
TGME49_202630	_LAPTIDAVALSER_	mitoAPEX	2	678.38	0.12025	0.002608	62.68	41.641	1465200000
TGME49_221320	_LAAVHVPQVNK_	BirA control	3	392.568	-0.038059	0.0011514	70.399	57.391	1464900000
TGME49_288830	_VMNNFELAALPQTSEK_	mitoAPEX	2	896.451	0.22314				1464800000
TGME49_245460	_NSIVAIDATPFK_	APEX control	2	638.351	-0.83331	1.2047e-06	134.56	117.35	1463900000
TGME49_221320	_AHVVLAAVLFR_	BirA control	2	598.369	0.25085	0.00037754	96.143	68.662	1463700000
TGME49_226730	_SVHVPSGEVLPVYDVAMK_	mitoBirA	3	643.005	0.35098	0.0063779	43.261	38.502	1462400000
TGME49_294800	_NMITGTSQADVALLVVPAEAGGFEGAFSK_	mitoBirA	3	960.82	-1.1591	4.4088e-14	110.47	106.31	1462300000
TGME49_264040	_QGTPLVTEFER_	mitoAPEX	2	638.83	-0.16742				1461900000
TGME49_244200	_LLNEGVVTEADLQQLK_	mitoBirA	3	590.66	-0.22016	3.6103e-10	116.87	105.2	1461400000
TGME49_249900	_DFLAGGISAGVSK_	mitoBirA	2	611.327	-0.11864				1461000000
TGME49_221320	_TGVMGAFQSLEEVQEVGDR_	mitoBirA	3	684.662	-0.29377	7.3891e-33	182.17	172.85	1461000000
TGME49_284190	_YLATVIVNGPLTPLVNADACPDK_	mitoBirA	3	814.43	-3.5575	1.8095e-10	110.75	102.53	1460500000
TGME49_218560	_HLEVQLLADK_	BirA control	2	583.332	-0.17371	0.0001991	122.7	83.825	1460000000
TGME49_260180	_VFEDADNVAMAVR_	mitoBirA	2	718.846	-0.90805	2.0735e-05	96.059	81.613	1458000000
TGME49_320050	_VLATAESTELPR_	mitoBirA	2	643.851	1.1669	8.4703e-08	148.18	98.883	1457200000
TGME49_226730	_ATVANMAPEYGATMGFFPVDEQTLR_	mitoAPEX	3	906.096	-0.31965	7.1379e-32	161.41	154	1457100000
TGME49_305520	_EYQIIDHFFQPGNCAAPLKDDVMK_	mitoBirA	4	709.841	-2.1955	0.00023986	63.559	59.602	1457000000
TGME49_288830	_HAPTLAQQFPQLSPLK_	mitoAPEX	3	592.665	-0.00062415	1.0374e-05	80.411	80.411	1456900000
TGME49_319920	_VPQLNIGDEYDITELTK_	mitoBirA	3	650.002	-0.10498	6.3934e-12	123.59	116.74	1456400000
TGME49_221320	_FVLDAIIGDPDKFIGVENLR_	BirA control	2	1116.11	-0.64178	8.7381e-09	117.37	108.31	1455800000
TGME49_313140	_GADKVTASDYLTTEEFMDAISDTLK_	mitoBirA	3	907.765	-0.71933	1.7564e-42	185.84	179.88	1455100000
TGME49_273760	_TFHPEEVSAMVLGK_	mitoBirA	2	772.893	-0.81157	1.6579e-11	148.41	126.63	1454800000
TGME49_232090	_HSQVALLDISETQLQR_	mitoBirA	2	919.492	0.59292	8.2899e-20	164.01	153.39	1454700000
TGME49_268830	_ALDFLPVDVEHHGEEYTQK_	mitoBirA	3	743.027	-0.37163	8.1165e-10	108.71	101.46	1453500000
TGME49_207170	_LEGSLLPPPHIPGIR_	mitoBirA	3	532.647	-0.92765	1.0854e-07	96.866	78.662	1452300000
TGME49_236210	_TQLLGHLDSTTAVAEDIGR_	mitoAPEX	3	666.348	-0.060601	3.2536e-15	133.16	122.3	1450500000
TGME49_221320	_EVYASQDQLGGPEVMFR_	BirA control	3	642.64	-0.014234	6.7222e-06	86.772	82.155	1450100000
TGME49_202680	_VISPQEFCTAIDAVTEADIK_	mitoBirA	3	736.368	-0.11532	7.979e-11	123.19	118.12	1448700000
TGME49_249900	_DFLAGGISAGVSK_	BirA control	2	611.327	0.16517	0.00024528	76.01	48.145	1448200000
TGME49_259710	_DGVVDLADFK_	mitoBirA	2	539.774	0.43668	0.00066266	91.549	62.752	1447600000
TGME49_221320	_VEWNDASNPSLGFK_	mitoBirA	2	782.376	-0.25158	3.6529e-06	107.74	93.304	1447500000
TGME49_319920	_ELLENPAMMLLHLR_	mitoAPEX	3	560.637	-0.28611	1.6525e-06	100.22	73.217	1447100000
TGME49_294800	_GCATFLAQVIVLNHPGEIK_	mitoBirA	2	1034.06	-1.0362	1.6594e-32	185.85	184.05	1447000000
TGME49_284190	_DVFFEVMGLPR_	mitoBirA	2	655.334	0.030652	1.881e-05	139.86	123.92	1446700000
TGME49_273760	_SINPDEAVAYGAAVQAAILK_	mitoBirA	3	667.693	0.12578	4.3561e-16	139.9	136.04	1445300000
TGME49_312090	_VTLGLPVGALINCCDNSGAK_	mitoBirA	2	1030.02	-0.094784	3.1056e-39	186.56	182.44	1445200000
TGME49_251780	_ILQHLIDEFKK_	mitoAPEX	2	692.403	0.32959	7.7212e-05	131.69	95.245	1444300000
TGME49_262380	_AQIAALEMFR_	mitoAPEX	2	575.308	-0.46129	0.00018661	125.75	114.15	1444100000
TGME49_261950	_TVLIMELINNVANK_	mitoBirA	2	786.445	-0.15775	5.8921e-27	205.96	172.37	1443800000
TGME49_221320	_TGVMGAFQSLEEVQEVGDR_	mitoAPEX	2	1026.49	0.015372	4.4343e-20	144.75	126.12	1443400000
TGME49_251780	_VQTEVNLPFITADQTGPK_	mitoBirA	3	653.346	1.4175	2.9151e-15	129.25	104.34	1442800000
TGME49_250770	_KLPPDVQVALFSATMPQDILELTTK_	BirA control	3	919.17	0.61817	5.6317e-10	108.49	95.594	1442400000
TGME49_319920	_PTITAFLIK_	mitoBirA	2	502.313	-0.63379	0.00071696	152.11	91.201	1442000000
TGME49_289690	_SSDVIVSNASCTTNCLAPLAK_	BirA control	2	1104.54	0.042739	1.23e-05	102.07	99.267	1441600000
TGME49_292920	_ELISNAADALEK_	mitoAPEX	2	637.335	0.035984				1441400000
TGME49_232340	_TITCFGAASMQGWR_	mitoBirA	2	793.366	0.21756	9.8014e-35	234.87	183.26	1441400000
TGME49_320220	_DMLAAGTTEVDLRPIQEGMTAVFK_	mitoBirA	3	865.105	0.043061	1.1117e-22	146.25	136.11	1441300000
TGME49_289690	_SSDVIVSNASCTTNCLAPLAK_	mitoAPEX	2	1104.54	-0.36638	1.0197e-22	156.67	145.9	1441300000
TGME49_221320	_(gl)QGDLTGAEAPLR_	APEX control	2	605.807	-0.78044	0.00023469	86.803	72.568	1440900000
TGME49_232940	_IAEIQAPAEIR_	BirA control	2	605.843	0.13956	0.00010682	117.79	86.903	1440000000
TGME49_251780	_MKETAEAYIGRPVK_	mitoAPEX	4	398.967	-0.49721	0.002537	55.98	49.147	1439700000
TGME49_221320	_TGVMGAFQSLEEVQEVGDR_	mitoAPEX	3	684.662	-0.15242	0.0022251	59.857	59.857	1439200000
TGME49_261950	_VALTALSVAEYFR_	mitoBirA	2	720.398	0.26794	5.0626e-34	230.59	92.358	1439100000
TGME49_290670	_VVAPGVYFAQELVNAPANYCNPVTLAR_	mitoAPEX	3	978.504	0.11082	4.6118e-18	125.35	118.2	1438200000
TGME49_313390	_VDISGVDVSSIKDEQFGASK_	mitoBirA	3	694.351	0.089852	4.883e-05	89.663	74.148	1437100000
TGME49_314400	_EGSHITAIAWGTQVHR_	mitoAPEX	4	441.48	-0.15135	3.9353e-08	104.55	92.648	1436400000
TGME49_228470	_YYEVILVDPAHNAIR_	BirA control	3	591.649	0.27537	6.783e-06	81.632	76.42	1436200000
TGME49_249900	_YFPTQAFNFAFK_	BirA control	2	740.867	-0.64202	0.00046785	87.184	78.65	1435900000
TGME49_260170	_YLPAPYEIPQVAYDQDKQEEEVPLHADPK_	mitoBirA	4	846.417	-0.15932	6.0777e-07	69.578	62.553	1435800000
TGME49_226730	_AIIAESFER_	mitoAPEX	2	518.277	-0.027927	0.0012995	128.38	64.964	1435500000
TGME49_284560	_ATNVKDEIALTGTDVELVSR_	mitoBirA	3	711.046	-0.016243	3.4153e-30	163.79	151.59	1434500000
TGME49_232340	_EKLQAAGNVTSATLK_	mitoBirA	3	510.954	-1.0152	6.5964e-15	144.18	121	1432600000
TGME49_284190	_(gl)QIGFPVMLK_	BirA control	2	508.286	-0.73437	0.0084079	70.256	40.089	1432500000
TGME49_306220	_KQSFSEFMSQR_	mitoBirA	2	687.827	-1.4541				1432500000
TGME49_248480	_VFQGTALLR_	mitoAPEX	2	502.798	0.24748	0.0024792	104.2	40.779	1432400000
TGME49_251780	_QAVITVPAYFNDSQR_	mitoBirA	2	854.936	0.71866	4.9838e-07	96.489	81.925	1431600000
TGME49_320220	_HLDQEVTDVSQLVEPVSSPHQTEGWFK_	mitoBirA	4	773.879	-0.26853	3.1755e-56	196.41	180.89	1430900000
TGME49_221320	_LLEFVVMATPEDMR_	APEX control	2	825.915	-1.6567	1.2852e-06	118.52	104.78	1429700000
TGME49_232050	_LFDSSTPLR_	mitoAPEX	2	518.277	0.19356				1429300000
TGME49_284190	_ELGITSVGIYSQEDSQALHR_	BirA control	2	1102.05	0.045561	1.9004e-54	210.43	198.05	1428800000
TGME49_284190	_HNVDAIHPGYGFLSENAEFAAAVENAGLMLVGPPPEVIR_	mitoBirA	4	1026.27	-0.71244	8.8042e-35	124.82	122.16	1428400000
TGME49_221320	_VDDVLKELDK_	BirA control	3	391.884	-0.21778	0.00012894	99.283	73.165	1427800000
TGME49_262960	_YFLTGLCPHDLFENTESGLYIK_	BirA control	3	873.093	-1.2255	0.00080532	59.339	53.113	1427600000
TGME49_239490	_ISFYIQNQGEEALQTAVGLALDKK_	mitoAPEX	3	879.469	0.1284	1.9002e-05	84.674	82.948	1427300000
TGME49_219550	_EAVTFLCHIR_	mitoAPEX	2	623.324	1.2087	0.0073842	72.275	49.157	1426300000
TGME49_262670	_ALPSNIQIIR_	BirA control	2	562.843	-0.038412	0.00059918	91.867	69.839	1425700000
TGME49_250770	_DFTVSSMHGDMDQK_	mitoBirA	2	799.335	-1.8171				1424700000
TGME49_288500	_LNTVLFANDVK_	mitoBirA	2	617.346	-0.1155	8.4089e-05	120.57	99.874	1424600000
TGME49_313390	_VDISGVDVSSIKDEQFGASK_	BirA control	3	694.351	0.61794				1424100000
TGME49_229670	_VAGASLLALFK_	mitoAPEX	2	545.337	-0.27767	0.0016604	79.659	35.341	1424000000
TGME49_221320	_IRDILSSLPESER_	BirA control	2	757.912	-0.46709	2.7644e-05	113.25	81.656	1422700000
TGME49_221320	_LQVDGTTVLLPNVFDPSELR_	mitoBirA	3	738.399	-0.74504	6.6455e-10	111.65	94.081	1421900000
TGME49_207170	_LEGSLLPPPHIPGIR_	mitoBirA	3	532.647	0.098859	3.3763e-08	105.03	89.231	1420800000
TGME49_247550	_CNPGNVFQVR_	mitoBirA	2	595.79	2.5763				1420400000
TGME49_292920	_ETAMASPYMEQFR_	mitoAPEX	2	780.845	-0.54904	2.8756e-11	150.49	138.07	1419200000
TGME49_204400	_VVDALGNPIDGK_	mitoAPEX	2	599.327	1.8728	0.0001262	105.65	73.32	1419100000
TGME49_221320	_MFNFLASDGFDESR_	BirA control	2	818.359	-1.1868	2.8581e-14	163.33	148.39	1418700000
TGME49_322210	_EVAAGWEFR_	mitoBirA	2	532.762	-0.60506	0.0031665	92.051	52.504	1418400000
TGME49_209260	_MWNCNEYVR_	mitoAPEX	2	636.268	-0.57581	0.0019024	115.71	108.78	1418300000
TGME49_232300	_FGFAPDSVELFAER_	APEX control	2	792.888	-0.80668	6.2222e-06	102.52	92.448	1418200000
TGME49_284190	_RFYAPFEATATVK_	mitoBirA	2	750.896	0.092113	8.5915e-06	116.19	90.206	1417400000
TGME49_288500	_LNTVLFANDVK_	mitoBirA	2	617.346	-0.29529	8.4089e-05	120.57	96.422	1417400000
TGME49_221320	_IRDILSSLPESER_	APEX control	3	505.611	-1.3622	0.00037563	71.031	61.231	1417300000
TGME49_292920	_GVIDCDDIPLNVSR_	mitoAPEX	2	786.888	-0.34148	2.3367e-11	144.8	134.45	1416700000
TGME49_288380	_EVVVEYEQLNK_	mitoBirA	2	675.351	0.67693	3.1067e-05	133.89	117.23	1416400000
TGME49_237290	_DEAGPYEER_	mitoBirA	2	533.228	3.0937				1416100000
TGME49_248340	_NLQYYDISAR_	mitoAPEX	2	621.809	0.33107	0.00026907	106.37	64.966	1416000000
TGME49_309752	_SKDCTQIEVNPLVETHDGR_	mitoBirA	4	550.268	-0.030639	0.0013683	60.332	58.51	1415900000
TGME49_263700	_IEDVTPIPTDSTR_	mitoBirA	2	722.37	0.096097				1415600000
TGME49_226730	_EPAPIEDIVDAYCLLNLGDSITTDHISPAGNIAVNSPAAK_	mitoBirA	4	1041.27	-0.2438	2.6314e-35	134.74	131.71	1415600000
TGME49_209030	_SYELPDGNIITVGNER_	mitoAPEX	2	888.942	0.14144	1.8344e-09	115.73	98.587	1415400000
TGME49_207440	_ISNVFVIGK_	BirA control	2	488.795	-0.74111	0.0029974	93.556	61.415	1415000000
TGME49_236210	_LPFHQTATVGVWIDSGSR_	mitoBirA	3	657.674	-0.026695	0.0016418	57.045	50.738	1414700000
TGME49_215460	_VSDSQSIVVFGLK_	mitoBirA	2	689.882	-0.68113	9.46e-18	182.89	157.41	1414600000
TGME49_247510	_VSPLGSPPELR_	BirA control	2	576.325	0.1092	0.0028319	74.611	40.736	1414500000
TGME49_215280	_DLVPDMTNFYAQYR_	mitoBirA	2	866.904	-0.47387	2.7821e-06	110.92	105.21	1414000000
TGME49_292130	_VVVIDCQGHLLGR_	BirA control	3	489.27	-0.16631	2.4233e-05	85.522	80.975	1413900000
TGME49_221320	_AHVVLAAVLFR_	BirA control	3	399.249	-0.043618	2.7822e-05	115.71	81.528	1413700000
TGME49_313140	_VFSFSGPGVMLGMYNTEDSIR_	mitoAPEX	2	1154.04	-0.55512	2.3642e-30	169.85	161.92	1413200000
TGME49_297810	_AQIAVDNNIPVNFQSLDYFDR_	mitoBirA	3	813.736	-0.73507	6.132e-22	143.4	135.81	1413200000
TGME49_284190	_QVFDESYLVGR_	mitoBirA	2	656.83	-2.0734	0.00016367	110.84	84.793	1412900000
TGME49_227948	_YTGGILPVTDIR_	mitoBirA	2	652.864	0.2189	6.6551e-06	124.12	99.266	1412300000
TGME49_221320	_LLQDDLEAR_	mitoAPEX	2	536.785	-0.33608				1412000000
TGME49_250770	_NDELTLEGIR_	BirA control	2	580.301	-1.0972	8.999e-05	138.22	102.77	1412000000
TGME49_265370	_TVGVHLPYTGR_	mitoBirA	2	600.33	-0.026174	0.0087739	63.691	49.456	1411300000
TGME49_250770	_GIYSYGFEKPSAIQQR_	mitoBirA	2	922.471	-0.6388	7.0328e-09	118.21	106.16	1411100000
TGME49_232090	_ATFCIEAALENATIK_	mitoBirA	2	826.422	-0.71815	4.6579e-11	131.72	119.66	1411000000
TGME49_284190	_AEELSFPSSVVEFLQGR_	mitoBirA	2	947.981	-0.069669	2.4104e-16	140.22	127.43	1409200000
TGME49_251780	_IINEPTAAALAFGMDK_	mitoAPEX	2	831.432	-0.46324	7.5221e-07	93.226	84.911	1409000000
TGME49_306650	_VIEEEAQPFAHNQNVQASLK_	mitoBirA	3	751.382	0.2748	3.1593e-15	133.21	118.28	1407500000
TGME49_294800	_VPFVAISGFVGDNMVEK_	BirA control	3	603.647	-0.21608	0.00010609	68.481	59.488	1406900000
TGME49_221320	_QPVFIYIPPHGELR_	mitoBirA	3	555.975	0.28148				1406400000
TGME49_251780	_MKETAEAYIGRPVK_	mitoBirA	3	531.62	0.23176	1.574e-11	143.94	135.6	1406100000
TGME49_284190	_VVGDFAQFLVQNK_	mitoAPEX	3	488.933	0.052633	4.044e-07	121.02	108.39	1405500000
TGME49_226970	_EGDIVTAGQCRPLSK_	BirA control	3	544.279	-0.30528				1405200000
TGME49_221320	_EPPEAEGLLGR_	mitoAPEX	2	584.304	-0.48872	0.00031322	81.017	34.555	1404800000
TGME49_243490	_AVFNYIPSPGR_	mitoBirA	2	610.825	1.1076				1403600000
TGME49_202680	_LEHMPDQMVSELLHTTAWHNNTLGHK_	mitoBirA	5	608.697	-1.0275	2.5746e-10	107.65	104.75	1403100000
TGME49_248340	_APEIQIDPNLVQEAER_	mitoAPEX	2	911.471	0.028207	5.062e-16	156.49	141.89	1403100000
TGME49_221320	_(gl)QVVLLGNDITFQGGSFGVPEHLFFTQVSR_	BirA control	3	1059.21	-0.59255				1402900000
TGME49_263700	_IEDVTPIPTDSTR_	mitoBirA	2	722.37	-0.20342				1402200000
TGME49_251780	_GDVVGIDLGTTNSCVAVMEGSQPK_	mitoAPEX	2	1217.58	-0.19271				1402100000
TGME49_249900	_VSAEQGVASLWR_	mitoBirA	2	651.844	0.92783	8.8553e-48	266.69	208.18	1401800000
TGME49_248340	_NLQYYDISAR_	APEX control	2	621.809	-0.51405	0.00022227	112.89	62.54	1401800000
TGME49_288750	_ITANSPVQYVPSPPTK_	mitoBirA	2	849.957	0.43906	6.854e-10	121.51	107.08	1401700000
TGME49_219550	_KPASPVVAVQSPGREEK_	mitoBirA	3	593.663	0.065094	1.4068e-21	157.07	141.44	1400400000
TGME49_292130	_LGDLSSQVGWSHGDLVAR_	BirA control	3	632.99	0.37623	3.5156e-15	126.84	119.13	1400000000
TGME49_244200	_YIHMGVLANPSHLEAVDPLVIGQAR_	mitoBirA	2	1350.72	-0.35702	1.035e-22	146.25	141.13	1399100000
TGME49_273760	_TFHPEEVSAMVLGK_	mitoBirA	2	772.893	0.32341				1399100000
TGME49_266960	_AILMDLEPGTMDSVR_	mitoBirA	2	824.408	0.74236	4.7415e-10	123.76	111.84	1399100000
TGME49_247550	_GYISPYFITNSK_	mitoAPEX	2	695.356	-2.3538	0.00016131	101.89	6.7943	1399000000
TGME49_243490	_GCLSHHLGISTEYCK_	mitoBirA	3	587.94	-1.539	1.4748e-10	123.29	114.73	1397900000
TGME49_204400	_IVDVPIGPGLLGR_	BirA control	2	653.398	-0.089563	4.4818e-05	90.697	66.443	1397000000
TGME49_311720	_AKFEELNSDLFQK_	mitoBirA	2	784.901	-0.57213	3.6348e-10	141	110.52	1396900000
TGME49_250770	_GIYSYGFEKPSAIQQR_	BirA control	2	922.471	0.11564				1396300000
TGME49_320220	_KHLDQEVTDVSQLVEPVSSPHQTEGWFK_	mitoBirA	4	805.903	-0.79312	1.7593e-25	145.65	138.22	1395800000
TGME49_251780	_AKLEELVGGLLQQSVEPCEK_	mitoAPEX	2	1114.09	-0.43341	4.4016e-46	193.64	187.33	1395700000
TGME49_230410	_TAPAEGGIGQLR_	mitoBirA	2	585.317	-0.93452	0.0002547	92.247	81.398	1395500000
TGME49_245460	_LDTGNYSWSSQK_	BirA control	2	693.32	-0.31695				1395100000
TGME49_236210	_MVVAAAGDVDHK_	mitoBirA	2	606.806	-0.53055	0.00032346	90.614	64.496	1395100000
TGME49_284190	_RFYAPFEATATVK_	mitoAPEX	3	500.933	0.18465	2.5908e-06	104.81	88.032	1394500000
TGME49_249900	_YTGIVDCFR_	APEX control	2	565.769	-0.7099	0.0079492	79.148	61.089	1394400000
TGME49_226730	_GLSVPPYIVTTLSPGSR_	mitoAPEX	2	872.486	0.22387				1394000000
TGME49_251780	_SQVFSTAADNQTQVGIK_	mitoBirA	2	897.455	0.43305	2.7406e-11	123.63	113.02	1393400000
TGME49_221320	_VTAENPDEGFKPTSGR_	mitoAPEX	3	568.944	-0.079201	8.5911e-12	130.29	115.42	1392400000
TGME49_249900	_DFLAGGISAGVSK_	mitoBirA	2	611.327	0.95895				1392000000
TGME49_242840	_GVYPPVAGGPVYWALR_	mitoBirA	3	567.975	-0.14208	7.9531e-12	126.32	119.63	1391500000
TGME49_288830	_IIAENFPNVEGKPR_	mitoAPEX	3	528.623	0.17404	0.00016754	72.681	61.735	1390600000
TGME49_254620	_QNRPIPPWIR_	mitoBirA	3	426.247	-1.2047				1388800000
TGME49_215590	_IFAGVNAEKEPIPVLPTVHYNMGGIPTNWR_	mitoAPEX	4	830.937	-0.74922	0.00016207	49.087	45.054	1388500000
TGME49_294800	_EHALLAFTLGVK_	mitoBirA	3	433.587	-1.0304	2.1814e-07	135.99	122.05	1388000000
TGME49_268890	_GLTINECLAK_	mitoBirA	2	559.797	-0.20579				1386700000
TGME49_206470	_GTLGGTCLNVGCIPSK_	mitoBirA	2	817.405	-0.37299				1384100000
TGME49_228470	_INWLCKPVMK_	mitoAPEX	3	430.235	-0.56935	0.00038523	89.08	70.407	1383800000
TGME49_226730	_TNLVGMGILPLQFQEGQNAESLGLTGK_	mitoAPEX	2	1408.24	-0.13006	9.1551e-20	140.9	133.48	1383000000
TGME49_251780	_AKLEELVGGLLQQSVEPCEK_	mitoBirA	2	1114.09	-0.079575	3.8895e-46	195.05	190.69	1383000000
TGME49_290030	_VSTPGTLEVHTSPALQQQPHFHEEAAGHH_	mitoBirA	6	524.591	-0.78949	0.00021315	45.941	41.542	1382800000
TGME49_221320	_NVCLFALTTPMDFGTEEEK_	mitoBirA	2	1101.51	-0.46797	5.2708e-38	191.4	168.58	1382400000
TGME49_209030	_TTGIVLDSGDGVSHTVPIYEGYALPHAIMR_	mitoBirA	3	1057.2	-1.1539	1.0686e-73	210.56	203.68	1382200000
TGME49_259710	_TPEFTLAK_	mitoBirA	2	453.75	0.55163				1381800000
TGME49_313140	_NILDGTVFR_	mitoBirA	1	1034.56	0.35989				1381600000
TGME49_312090	_VTLGLPVGALINCCDNSGAK_	mitoBirA	2	1030.02	-1.0786	8.3411e-47	193.72	187.11	1381600000
TGME49_232340	_KGVSPAGLAESLSR_	mitoBirA	2	686.383	0.17916	1.8579e-05	97.767	60.439	1381000000
TGME49_262690	_YTVSSDMDVK_	mitoBirA	2	572.763	-0.096592	0.0027692	81.017	70.645	1381000000
TGME49_290030	_EILQPLWVVEPPNFLR_	mitoBirA	2	975.546	0.19077	1.1196e-11	136.34	136.34	1380300000
TGME49_288685	_EATALSPASDNLTEK_	mitoBirA	2	773.883	0.15644	0.0001826	73.726	60.767	1380100000
TGME49_220400	_(ac)ASGMGVDENCVAR_	BirA control	2	704.303	-0.56167	0.00093045	60.364	50.852	1379900000
TGME49_232300	_FGFAPDSVELFAER_	mitoBirA	2	792.888	-0.63504	4.7436e-07	122.64	107.09	1379300000
TGME49_244200	_HLVRPDVPAAPQLTGVPLDR_	mitoBirA	2	1076.11	-0.74247				1379200000
TGME49_268890	_GLTINECLAK_	mitoBirA	2	559.797	-0.41109	0.00040771	98.048	73.21	1378800000
TGME49_221320	_GFPIDALHTELFEVETQDGSKK_	BirA control	3	821.08	-0.909	5.024e-05	84.327	77.533	1378700000
TGME49_206470	_VVSTLTQGIEHLFR_	mitoBirA	3	533.967	-1.097	3.7783e-07	116.51	82.246	1378700000
TGME49_288500	_YNMSSIGDFLR_	mitoAPEX	2	651.811	-0.090845	4.3523e-05	127.83	94.743	1378700000
TGME49_235470	_AEIMEIVQQSK_	mitoBirA	2	638.334	-1.446	0.0030129	63.091	51.772	1378600000
TGME49_322210	_YTSEASCAFASVQHLVR_	mitoBirA	3	642.644	-1.632	9.4017e-16	127.83	123.08	1378400000
TGME49_221320	_VDDVLKELDK_	BirA control	2	587.322	-0.11385	0.0011134	117.09	74.881	1377800000
TGME49_311720	_NEATINPTNTLFDVK_	BirA control	2	838.928	-0.053979	1.051e-23	174.62	163.97	1376800000
TGME49_207440	_TDQCYPAGFMDVISIEK_	mitoAPEX	2	987.453	-0.30731	7.1245e-08	107.41	103.41	1376500000
TGME49_219550	_(gl)EAVTFLCHIR_	mitoBirA	3	409.882	-0.16573				1376300000
TGME49_234420	_GMAETVLSWK_	mitoAPEX	2	561.287	-0.30536	0.00046366	94.692	75.714	1376100000
TGME49_232300	_GLCAMAQAESLR_	APEX control	2	653.816	-1.0814	0.00013882	104.3	88.159	1375000000
TGME49_226730	_LGGPPSSINPLVDVDLVIDHSVQVDFSR_	mitoAPEX	3	992.521	-0.36171	2.6534e-13	115.45	113.68	1374200000
TGME49_235470	_GFQIWTDLAPSVK_	mitoBirA	2	731.39	0.043899	4.9353e-08	134.61	120.43	1373500000
TGME49_254620	_QNRPIPPWIR_	mitoBirA	3	426.247	-0.29603	0.00014935	95.608	76.001	1373100000
TGME49_219320	_TELTYAVTSEQIK_	mitoBirA	2	741.888	0.28618	1.1144e-05	105.03	94.27	1372700000
TGME49_243570	_EASVYNTYTLPK_	mitoBirA	2	693.351	0.79812	1.0427e-06	117.86	100.12	1372500000
TGME49_248480	_VFQGTALLR_	BirA control	2	502.798	0.057315	0.0024148	105.52	35.696	1372500000
TGME49_294800	_VPFVAISGFVGDNMVEK_	mitoAPEX	2	904.966	-0.66969	3.1008e-19	141.13	132.56	1371100000
TGME49_247550	_TALSDAASVASLMTTTEAAVVEAK_	mitoAPEX	2	1169.1	-1.0078	2.1302e-15	131.33	124.68	1370000000
TGME49_290030	_VSTPGTLEVHTSPALQQQPHFHEEAAGHH_	mitoBirA	6	524.591	-0.16828				1369300000
TGME49_292130	_LQVFEGVPTMVER_	mitoBirA	2	752.895	-0.2956	8.6882e-08	129.77	117.71	1369200000
TGME49_249900	_DFLAGGISAGVSK_	BirA control	2	611.327	0.075587	2.4381e-05	92.65	55.094	1368900000
TGME49_284190	_QGASLPALGLSQESILSAVQTDPR_	mitoAPEX	2	1219.65	0.21248	6.8336e-53	192.44	180.01	1368700000
TGME49_226730	_GFGLSEEQAEK_	mitoAPEX	2	597.785	0.055283	0.00016736	110.39	97.182	1366200000
TGME49_320050	_IICQVVYSTIEGDR_	mitoAPEX	2	826.919	-0.097352	3.7002e-05	88.561	65.984	1365500000
TGME49_284190	_RFYAPFEATATVK_	mitoAPEX	2	750.896	-0.14358	2.0185e-06	122.97	91.291	1364700000
TGME49_260170	_QGDTVLLEAEVPLK_	mitoBirA	2	756.419	0.1177	3.0364e-14	162.7	147.12	1364700000
TGME49_221320	_DADPYPEVDR_	APEX control	2	588.762	-0.81786	0.0044268	75.416	58.797	1364600000
TGME49_288380	_EVLHDKVEQVVVSNR_	mitoBirA	3	584.32	-0.6361	3.1089e-24	176.29	155.56	1363500000
TGME49_288685	_EATALSPASDNLTEK_	mitoBirA	2	773.883	0.35974	1.405e-11	138.19	115.19	1362900000
TGME49_284190	_HFFIEVNAR_	BirA control	2	566.799	-0.50081	0.0024881	104.01	79.983	1362700000
TGME49_209260	_VFYSLPDGKDPFPVDPDVEDVFDMK_	mitoAPEX	3	957.786	-0.089292	4.7811e-08	104.53	101.84	1362100000
TGME49_311720	_DKDLLPYEIINK_	mitoBirA	2	730.903	-0.038355	6.6945e-07	143.55	121.49	1361500000
TGME49_221320	_AYGQIALEAIR_	mitoBirA	2	602.838	0.054025	0.00011701	116.55	91.693	1360800000
TGME49_236210	_IILPTEKPFFCGSELLHR_	mitoBirA	4	540.044	0.042304				1360700000
TGME49_312160	_PTQYQTEICNQATNVQPGVEKDPTK_	mitoBirA	3	949.459	0.12102	8.1175e-54	190.33	178.76	1360600000
TGME49_214750	_MVVPNAFGQNEAR_	mitoAPEX	2	716.854	0.38743	0.0016656	67.997	60.829	1360300000
TGME49_320140	_GNCSGQYEELHVCIDR_	mitoBirA	3	646.281	-0.10514	8.7725e-09	107.82	104.91	1359900000
TGME49_314400	_EGSHITAIAWGTQVHR_	mitoAPEX	3	588.304	0.599	6.6272e-12	128.76	112.82	1358800000
TGME49_288720	_GPLANTFPSAADITLPVA_	mitoAPEX	2	877.97	0.15211	1.4291e-14	128.06	117.99	1357100000
TGME49_284190	_(gl)QGASLPALGLSQESILSAVQTDPR_	BirA control	2	1211.13	-0.41389	1.5536e-15	126.47	119.22	1357000000
TGME49_226730	_EPAPIEDIVDAYCLLNLGDSITTDHISPAGNIAVNSPAAK_	mitoAPEX	4	1041.27	-0.45083	1.8555e-42	150.48	146.43	1356500000
TGME49_250770	_SQIYDVFK_	mitoAPEX	2	500.261	0.11097				1355500000
TGME49_297810	_ITFVSHPGVMAVSK_	mitoBirA	2	736.9	-1.0005	2.5565e-11	143.64	143.64	1355400000
TGME49_313140	_DIFQSYYDEQFKPLFEK_	mitoBirA	2	1099.03	0.20758	1.4499e-36	193.06	175.82	1355000000
TGME49_294800	_SVEMHHEVMEQAVPGDNVGFNVK_	mitoBirA	2	1277.1	-0.79893	3.0942e-31	171.29	147.09	1354300000
TGME49_284190	_IGHPPFGFPEPLR_	mitoBirA	2	732.393	-0.22538	6.5897e-06	110.31	98.387	1354100000
TGME49_230410	_HLTVNDLPLGR_	mitoAPEX	3	412.235	0.18152	9.0965e-05	94.409	82.771	1353900000
TGME49_236210	_DSPLGYTILGPEENIR_	mitoAPEX	2	887.455	0.47599	3.5531e-20	169.37	153.85	1353700000
TGME49_278990	_CMLGGVLSCGLTHTAVTPLDVVK_	mitoAPEX	3	810.085	-0.63379				1353000000
TGME49_225730	_TRPGLLLGPSTL_	mitoBirA	2	612.869	-1.0025	0.0010976	96.745	85.486	1352500000
TGME49_207620	_DPVAVAAVELLEQNLMPSPGELR_	mitoBirA	3	816.765	-0.60297	6.9469e-16	132.83	125.55	1352300000
TGME49_228470	_INWLCKPVMK_	BirA control	3	430.235	-0.41003	0.00093975	80.755	58.069	1351300000
TGME49_290600	_IGIMPGYIHAK_	mitoAPEX	3	400.558	-0.028953	0.0047927	57.532	51.891	1351100000
TGME49_232090	_LDPTALSSFHQR_	mitoBirA	3	457.905	-0.085233				1350300000
TGME49_221320	_NNYANVDLICQIAVQEK_	BirA control	3	664.667	0.15378	1.1573e-25	167.92	162.7	1350100000
TGME49_310490	_LWSLVSPATLEK_	mitoAPEX	2	672.382	0.047228	0.0038428	66.989	52.304	1350000000
TGME49_209030	_ELTSLAPSTMK_	mitoAPEX	2	589.31	-0.47882				1349900000
TGME49_221320	_EPPEAEGLLGR_	APEX control	2	584.304	-1.2653	0.00035252	97.734	43.983	1349900000
TGME49_232090	_HSQVALLDISETQLQR_	mitoBirA	2	919.492	0.025512	2.6207e-09	111.77	104.64	1348800000
TGME49_221320	_IGLYENLKDK_	BirA control	2	596.832	0.16704	0.0011965	110.39	55.406	1348100000
TGME49_251780	_STLGQEDPEPIREALK_	mitoBirA	3	594.979	-0.31795	1.8806e-07	97.065	91.295	1348000000
TGME49_273760	_NDAVEIIANDQGNR_	mitoBirA	2	764.871	-0.32047	2.6119e-14	164.2	158.12	1347400000
TGME49_292920	_AELLEHLGTIAK_	mitoBirA	2	647.872	-0.029242	2.0166e-11	173.19	150.18	1346600000
TGME49_221320	_IAANILAQTAGVPSIPWSGDSLK_	mitoAPEX	3	770.422	-1.0199	1.7282e-10	111.38	105.23	1344200000
TGME49_292130	_VVVIDCQGHLLGR_	mitoAPEX	3	489.27	-0.099331	1.317e-06	111.94	100.23	1344200000
TGME49_247550	_GFNAQTGEYVDMMAAGIIDPTK_	mitoAPEX	2	1165.05	-0.87871	3.8693e-42	189.57	169.65	1344000000
TGME49_244200	_SVVWAQEEPMNQGAWFYTSK_	mitoBirA	2	1179.55	-0.97469	2.6899e-63	237.15	229.13	1343500000
TGME49_251780	_RQEITIQSSGGLSDSQIEQMVK_	mitoAPEX	3	812.08	-0.16532	2.3904e-48	190.85	171.14	1343000000
TGME49_288720	_ADVDEFPGVAHLVSDEYEQISSEALEAAR_	BirA control	3	1049.83	-0.55408	8.3424e-86	237.2	225.18	1342400000
TGME49_250770	_DFTVSSMHGDMDQK_	mitoBirA	3	533.226	-0.5956	1.88e-05	81.703	5.6934	1340800000
TGME49_226970	_NVTCHLSPCFEQVK_	mitoAPEX	2	859.903	-0.11063	6.8214e-06	101.3	95.099	1339700000
TGME49_244200	_NVCNFIR_	mitoAPEX	2	461.732	-0.54182				1338900000
TGME49_273760	_SINPDEAVAYGAAVQAAILK_	mitoBirA	2	1001.04	-0.95104	9.554e-31	172.5	165.55	1337600000
TGME49_262670	_ALPSNIQIIR_	mitoBirA	2	562.843	-1.1659	0.00034072	102.07	75.178	1336000000
TGME49_292920	_SGSLEFLMK_	mitoBirA	2	506.263	-0.21512	0.0032349	91.867	70.339	1335800000
TGME49_232340	_NAVLCEALQQSFLDVDEQMK_	mitoBirA	2	1169.56	-0.35226	7.8303e-109	298.76	289.01	1335700000
TGME49_244200	_GAPFISSAPGSLPAGASFVTPESLPVSPQQSVHDTSR_	mitoAPEX	3	1226.95	0.14592	1.3712e-28	135.88	127.26	1335500000
TGME49_262640	_LNQISYDHNYDWER_	mitoBirA	3	618.28	0.0047689	2.4444e-09	137.8	132.08	1335500000
TGME49_261570	_NCPVLAIDNVR_	BirA control	2	635.832	-0.32352				1334800000
TGME49_284190	_RLLLCDTTLR_	BirA control	2	630.858	-0.30371	0.0014971	72.187	48.223	1334300000
TGME49_294800	_NMITGTSQADVALLVVPAEAGGFEGAFSK_	mitoAPEX	3	960.82	-0.010309	3.2472e-14	114.24	105.13	1333600000
TGME49_245620	_CGLTYILNAEE_	BirA control	1	1282.6	0.060615				1333100000
TGME49_231910	_GTLAVLALSSDK_	mitoAPEX	2	587.838	0.13451	1.178e-05	123.26	94.298	1331600000
TGME49_221320	_EQPDGSYIVLFPGEK_	APEX control	2	839.92	-0.65494	2.2534e-05	84.41	72.255	1330400000
TGME49_254030	_GTPFKPVMYIPSITGK_	mitoAPEX	3	579.32	-0.31884	0.00011357	70.802	63.484	1330400000
TGME49_221320	_ASEDVPHVLTGDPIAQR_	BirA control	2	902.963	-0.80174	2.1992e-07	105	96.433	1330300000
TGME49_306670	_AIFGNWCTR_	mitoBirA	2	562.769	-1.2944	0.0024148	105.52	80.745	1330200000
TGME49_226730	_EQFNISLNK_	mitoBirA	2	546.788	0.2554	0.0079492	79.148	55.118	1330000000
TGME49_288750	_DHGLMYDDLYSDKEPVFAR_	mitoBirA	3	757.684	-0.052779	1.566e-52	229.4	223.87	1330000000
TGME49_230410	_KFHSLLNNSVALR_	mitoBirA	2	749.928	-0.20462	0.0030951	69.345	46.46	1329400000
TGME49_299070	_VQLPHPEILSVLRPDDIVLMDDGK_	mitoBirA	4	675.616	0.29016	4.9491e-23	150.06	145.86	1329200000
TGME49_245680	_KGDYVDIVCDPSVQK_	mitoBirA	3	574.95	-0.062556	1.0683e-07	97.2	88.667	1329200000
TGME49_263300	_SKNPEIVNTASVSPAGAFDASSK_	mitoAPEX	3	759.717	0.10976	8.423e-05	78.645	72.338	1329000000
TGME49_288500	_QVDIQTSTELLDLK_	mitoBirA	2	801.933	0.05122				1327900000
TGME49_221320	_LSVSSHQGSWLHTK_	BirA control	3	522.939	0.23288	7.2527e-07	108.66	89.462	1327600000
TGME49_202680	_DYVPPHSNIQYSK_	mitoBirA	3	516.588	0.23785	0.0015294	58.32	58.32	1327600000
TGME49_209030	_AVFPSIVGKPK_	mitoBirA	3	381.569	-0.011175	0.0016082	70.942	57.133	1327300000
TGME49_262670	_ALPSNIQIIR_	mitoBirA	2	562.843	-0.13698	0.0029262	80.231	53.184	1327200000
TGME49_320220	_HLDQEVTDVSQLVEPVSSPHQTEGWFK_	mitoBirA	4	773.879	-0.40288	2.4102e-56	198.68	194.08	1326900000
TGME49_262640	_LNQISYDHNYDWER_	mitoBirA	2	926.916	-0.98347	2.1692e-11	145.69	140.93	1326900000
TGME49_216180	_ALQQHVVIPLK_	mitoBirA	3	415.927	0.0054924	0.00072493	73.887	41.472	1326200000
TGME49_209030	_TTGIVLDSGDGVSHTVPIYEGYALPHAIMR_	mitoAPEX	4	793.155	-0.58157	1.556e-17	122.8	121.59	1325400000
TGME49_247550	_CNPGNVFQVR_	mitoBirA	2	595.79	0.75861	0.0022813	83.456	71.22	1325300000
TGME49_262690	_YTVSSDMDVK_	mitoBirA	2	572.763	0.0080468	0.0098352	69.672	61.447	1324700000
TGME49_226730	_VPLSEVKEDFQVSLR_	mitoAPEX	3	582.653	0.0077824	2.0522e-11	128.73	121.98	1324400000
TGME49_230410	_VWGVSVDSAYTHQAWTR_	mitoAPEX	3	654.987	0.76239	1.59e-07	97.095	88.038	1324400000
TGME49_215460	_SSGFAMIYDNPNAAK_	BirA control	2	793.369	0.47829	5.1893e-06	90.707	88.394	1324300000
TGME49_207440	_FEAGNMAMVTGGHNVGR_	APEX control	3	583.272	-1.3711	6.1209e-05	72.433	63.397	1322900000
TGME49_273760	_GVTSSQVQDLLLLDVAPLSLGLETAGGVMTK_	mitoBirA	3	1038.23	-0.42907	2.727e-17	120.37	116.31	1321500000
TGME49_248340	_LTNQPALSFVGEHAK_	APEX control	3	537.954	-0.45767	7.1767e-10	116.78	100.96	1321200000
TGME49_221320	_HIEVQIVGDEDGQAVALSGR_	mitoBirA	3	698.359	-0.0023978	1.0311e-21	142.23	128.25	1321100000
TGME49_236210	_(gl)QTEEVIFDR_	mitoBirA	1	1119.53	0.26943				1320900000
TGME49_284190	_LDAETVLAR_	APEX control	2	494.277	0.0712	0.0019024	115.71	65.674	1320800000
TGME49_206470	_YDVVVVGGGPGGYVAAIK_	mitoBirA	2	860.967	-0.65265	0.0018698	68.845	63.13	1320000000
TGME49_309752	_EVGFDKPVVLR_	mitoBirA	3	420.243	0.22439	0.00047694	82.029	66.439	1319900000
TGME49_244560	_AAAPLTAEEQEAVQK_	mitoBirA	2	778.402	0.25167	2.4134e-14	141.34	124.57	1319300000
TGME49_244200	_YHLGVEFDHFDADAQR_	mitoBirA	4	480.722	-0.14435	5.741e-12	128.95	120.74	1318300000
TGME49_288400	_EHLVSPAGDAGVPEAAKPAENR_	mitoBirA	4	554.533	0.36877	5.5175e-23	154.6	149.07	1318100000
TGME49_251780	_QAVITVPAYFNDSQR_	mitoBirA	2	854.936	0.36064	7.4532e-11	126.16	108.15	1317300000
TGME49_209030	_AVFPSIVGKPK_	mitoBirA	2	571.85	0.14022				1316700000
TGME49_292920	_LFQPANEVGVSLHSR_	mitoBirA	3	551.962	-0.65723	9.4035e-09	107.69	91.844	1316100000
TGME49_245620	_CGLTYILNAEE_	BirA control	1	1282.6	-0.69595				1315800000
TGME49_284190	_DCDLVSSVFYPAVFDEYQQFLK_	mitoBirA	2	1335.63	0.20779	6.4345e-15	130.89	128.3	1315700000
TGME49_204400	_TAVAVDAIINQK_	mitoAPEX	2	621.856	0.56914	4.4214e-05	117.79	102.65	1315700000
TGME49_292130	_MVVPSALR_	mitoAPEX	2	436.755	-0.21639				1315300000
TGME49_221320	_LFLHIVSPLNLASAK_	mitoAPEX	2	811.985	-0.11607	1.0496e-07	106.14	102.94	1314500000
TGME49_232300	_RGPANPLPDTIIVMDPKPEIPVVQPEEMDEGVLGPM_	BirA control	3	1294.32	-0.041405	6.6748e-05	47.105	45.698	1314200000
TGME49_299070	_LPISALSAR_	mitoAPEX	2	464.285	0.15466	0.0032349	91.867	18.634	1314200000
TGME49_284190	_ANVQAVPGTNEPVTDFEEAAAFCR_	mitoAPEX	2	1297.1	-0.24221	5.3131e-41	177.91	168.71	1312100000
TGME49_244200	_ILQLCDDREDVIHHENWELEK_	mitoAPEX	4	673.576	-0.40662	5.6216e-11	123.19	100.25	1310600000
TGME49_319920	_ERPAPVSEPAAASPSVGAEASSTTFSASPATR_	mitoBirA	4	772.381	-0.35361				1310500000
TGME49_299070	_TEQGADESDAWVEHTAAAVAR_	mitoBirA	3	738.673	-0.46152	1.2528e-39	179.58	150.48	1310400000
TGME49_204400	_GYLDPLDPK_	mitoBirA	2	509.266	0.42774				1309900000
TGME49_284190	_TAAIPPPLPSSVER_	BirA control	2	717.901	-1.0277	0.0012394	66.004	51.016	1309800000
TGME49_261950	_TVLIMELINNVANK_	mitoAPEX	2	786.445	-0.45587	5.545e-05	80.746	65.955	1309800000
TGME49_215350	_DLISIFGAHGYAK_	mitoAPEX	3	464.582	-0.050717	0.00068655	60.157	35.461	1309800000
TGME49_227600	_ALPGIPAVAPHR_	BirA control	3	400.24	0.30696	0.0055782	54.198	44.492	1309500000
TGME49_209030	_ELTSLAPSTMK_	APEX control	2	589.31	-0.99073	0.0016039	80.245	32.943	1309000000
TGME49_252630	_SVEFLQSQSGSK_	mitoAPEX	2	648.825	0.33194	2.355e-06	127.56	112.78	1308800000
TGME49_294800	_SGDAAMVNMEPSKPMVVEAFTDYPPLGR_	mitoAPEX	3	1003.81	-0.5891	1.2531e-83	227.03	224.59	1308600000
TGME49_251780	_QEITIQSSGGLSDSQIEQMVK_	mitoAPEX	2	1139.57	0.146	9.5594e-96	283.22	270.56	1307700000
TGME49_227948	_LEVTSEDEKEAADAVR_	mitoBirA	3	587.955	0.039463	1.853e-07	97.235	81.053	1306500000
TGME49_311720	_LKDVEAVCNPIISK_	mitoBirA	3	529.292	0.01263	0.0044048	53.861	48.946	1306400000
TGME49_284190	_LDGAIGASGAVVQPYYDSLLVK_	APEX control	3	746.067	-0.81851	2.923e-08	108.12	98.387	1306300000
TGME49_232300	_FGFAPDSVELFAER_	mitoAPEX	2	792.888	-0.086144	2.2404e-05	90.707	80.635	1306300000
TGME49_270510	_LENILAEPFAR_	BirA control	2	636.851	0.22857	8.043e-05	121.02	77.341	1304700000
TGME49_204020	_TSGTYATIVGHSDDGSK_	BirA control	3	565.932	0.40615	2.2661e-08	106.93	101.56	1304100000
TGME49_288750	_DHGLMYDDLYSDKEPVFAR_	mitoBirA	3	757.684	0.2791	4.3208e-46	221.13	212.66	1303600000
TGME49_232300	_FKDGYLISTGEPSK_	BirA control	3	514.6	-0.04948	1.8334e-05	85.909	67.12	1303100000
TGME49_284190	_EEELKEAFER_	BirA control	3	427.21	0.33804	0.0047973	64.82	49.191	1302900000
TGME49_288380	_AELVNNLGTIAR_	BirA control	2	635.859	-0.015816	5.7413e-08	151.13	106.76	1302700000
TGME49_244200	_MEQLSPFPFDLFIEDLKR_	mitoBirA	3	742.382	-0.10769	9.6532e-11	121.44	103.42	1302000000
TGME49_232300	_RGPANPLPDTIIVMDPKPEIPVVQPEEMDEGVLGPM_	mitoAPEX	3	1294.32	0.34861	2.7402e-08	66.1	65.563	1301700000
TGME49_232340	_QVCEDLCDECLAEDPLQSEGHGCDNMTCLIVELSSCLK_	mitoBirA	4	1121.98	-1.2952				1301000000
TGME49_221320	_FYADLHDRPER_	BirA control	3	473.565	-0.13397	9.2327e-05	102.52	91.577	1300600000
TGME49_313140	_VTASDYLTTEEFMDAISDTLK_	mitoAPEX	2	1175.55	-0.46443	1.7464e-62	225.29	218.49	1300000000
TGME49_320220	_KHLDQEVTDVSQLVEPVSSPHQTEGWFK_	mitoBirA	4	805.903	0.071025	7.0647e-19	135.57	124.11	1300000000
TGME49_221320	_HIEVQIVGDEDGQAVALSGR_	mitoBirA	3	698.359	0.20115	2.708e-15	134.32	117.79	1299900000
TGME49_232940	_IAEIQAPAEIR_	mitoAPEX	2	605.843	0.041663	8.043e-05	121.02	95.679	1299600000
TGME49_249900	_AMLFGPNNDANLFYK_	mitoBirA	2	857.917	-0.38774	5.4011e-09	111.12	106.77	1299300000
TGME49_202680	_VMEEVPEFK_	mitoAPEX	2	554.273	-0.17351	0.0042868	89.029	81.75	1298300000
TGME49_261950	_KGSITSVQAVYVPADDLTDPAPATTFAHLDATTVLSR_	mitoAPEX	4	957.997	0.28118	1.6674e-10	75.78	72.696	1297300000
TGME49_300140	_AQSDLAQALNAVDAHLK_	mitoBirA	3	588.979	-1.3395	6.9679e-20	141.13	130.02	1296200000
TGME49_244560	_APEMQIFLK_	BirA control	2	538.794	-0.22502	0.0026034	101.65	79.901	1296000000
TGME49_215280	_NCLACLTPIK_	mitoBirA	2	595.307	0.13485	0.0097278	69.786	53.811	1296000000
TGME49_292130	_DQVAFLQQYGHA_	BirA control	2	688.833	0.29956				1295400000
TGME49_243570	_EASVYNTYTLPK_	mitoAPEX	2	693.351	0.12358				1295400000
TGME49_231630	_VVEVLKEEIQER_	mitoBirA	3	490.944	0.34905	7.7882e-05	94.122	75.022	1295200000
TGME49_247550	_CNPGNVFQVR_	mitoBirA	2	595.79	0.10028	0.00033147	102.62	87.948	1294600000
TGME49_249900	_MLIQTQDSIPEIK_	mitoAPEX	2	758.408	-1.7243	7.7927e-12	155.39	131.13	1294500000
TGME49_207440	_TDQCYPAGFMDVISIEK_	mitoBirA	2	987.453	-0.73233	5.1094e-07	100.28	95.263	1294500000
TGME49_270510	_LENILAEPFAR_	BirA control	2	636.851	0.13277	0.00019161	107.97	70.639	1293600000
TGME49_251780	_MKETAEAYIGRPVK_	mitoBirA	3	531.62	-0.0039195	2.4208e-06	107.35	99.006	1292500000
TGME49_206470	_YDVVVVGGGPGGYVAAIK_	mitoBirA	2	860.967	0.54496	0.00021892	84.653	79.598	1292100000
TGME49_251780	_MKETAEAYIGRPVK_	mitoBirA	3	531.62	-1.0321	2.8969e-14	157.2	147.63	1291700000
TGME49_214750	_SVFLQTVSELCQR_	mitoAPEX	2	783.901	-0.27613	7.4082e-18	184.34	168.4	1291200000
TGME49_221320	_QPVFIYIPPHGELR_	mitoBirA	3	555.975	0.10271				1291000000
TGME49_235470	_GFQIWTDLAPSVK_	mitoBirA	2	731.39	0.37991	2.3789e-07	124.51	109.08	1290800000
TGME49_221320	_NNYANVDLICQIAVQEK_	BirA control	3	664.667	-0.81091	6.3518e-38	192.78	184.87	1290100000
TGME49_230410	_FHSLLNNSVALR_	mitoAPEX	2	685.881	0.042116	5.6629e-07	138.45	127.19	1289900000
TGME49_263300	_AGEFTLSLK_	BirA control	2	483.269	-0.051796	0.0079492	79.148	47.726	1288800000
TGME49_320050	_VLLDVGIVR_	APEX control	2	492.316	-0.99652	0.0023708	106.42	59.341	1288400000
TGME49_306220	_TEWPDFVAQIVNDPR_	mitoBirA	2	893.942	-0.15717	1.2994e-07	105.53	92.426	1287800000
TGME49_232090	_SALFSYLDAVTPPSTILATNTSSLSITK_	mitoBirA	3	966.85	-1.1746				1287100000
TGME49_231410	_VGFETIHENSIKPVAPLSENSK_	mitoBirA	4	599.817	-0.34846	5.2653e-07	100.76	91.739	1286800000
TGME49_292130	_LQVFEGVPTMVER_	mitoAPEX	2	752.895	-0.965				1286100000
TGME49_231410	_VNLSTATADPMGTVVQR_	mitoBirA	2	880.454	-0.27871	3.2864e-31	177.07	160.9	1286000000
TGME49_221320	_AYDETFTLSYVTGR_	mitoAPEX	2	811.888	-0.1079	1.1126e-11	151.3	123.97	1285500000
TGME49_284190	_IGHPPFGFPEPLR_	mitoAPEX	2	732.393	-0.37681	9.8304e-06	106.26	92.248	1285400000
TGME49_226970	_NVTCHLSPCFEQVK_	mitoAPEX	3	573.604	-0.21715	9.9081e-06	87.519	82.615	1284800000
TGME49_262380	_VSCTVELLHPTALHEGLR_	mitoAPEX	4	508.772	-0.57128	5.7757e-05	82.01	79.042	1283900000
TGME49_292920	_AELLEHLGTIAK_	mitoAPEX	3	432.25	0.044009	0.0012835	61.11	52.311	1283800000
TGME49_288720	_GPLANTFPSAADITLPVA_	APEX control	2	877.97	-0.61485	2.9346e-06	100.23	86.482	1283700000
TGME49_226730	_VSLNLSELEPCVAGPK_	mitoBirA	2	856.948	-0.037518	6.9855e-10	121.45	108.35	1283000000
TGME49_292920	_SGSLEFLMK_	mitoBirA	2	506.263	-1.4688				1282600000
TGME49_208790	_(ac)ASSAATSLAPSSSAAVPATANK_	mitoAPEX	3	668.008	0.12702	8.5896e-07	102.07	96.251	1282500000
TGME49_309752	_EFAELLGFSGDR_	mitoAPEX	2	670.828	0.00058488	2.8713e-12	178.71	154.25	1282000000
TGME49_244200	_(gl)QWIETPAK_	mitoBirA	1	955.488	0.033831				1280400000
TGME49_216530	_MVQDISALLVHR_	mitoBirA	3	461.259	-0.36337	2.0228e-05	110.08	90.978	1280000000
TGME49_202680	_EHLVYSAECLR_	mitoAPEX	3	459.559	-0.021477	6.5418e-06	134.84	107.41	1279800000
TGME49_284190	_(gl)QIGFPVMLK_	mitoBirA	1	1015.56	-1.831				1279400000
TGME49_206470	_IDGLSIDIDK_	mitoAPEX	2	544.795	-0.049505	0.00043804	96.229	30.603	1279300000
TGME49_297810	_AQIAVDNNIPVNFQSLDYFDR_	mitoBirA	3	813.736	-0.5468	3.9243e-10	113.63	107.65	1279200000
TGME49_221320	_LTQSLGYVGAGTVEYLYNR_	mitoAPEX	2	1052.54	0.040783	1.4115e-61	250.86	240.61	1279000000
TGME49_286530	_QFHPEGLEAQAPRPHQGLDMR_	mitoBirA	4	604.3	-0.38004	1.0316e-55	216.9	205.01	1278800000
TGME49_235470	_DLGNTTLDWIVR_	mitoBirA	2	701.87	0.18118	0.00010389	86.288	68.229	1278700000
TGME49_262670	_ISQYQVVGR_	BirA control	2	525.291	0.20103	0.00068206	156.51	60.598	1278700000
TGME49_210690	_LNLANPQAGMQK_	mitoAPEX	2	642.84	0.59268	1.5041e-07	141.1	116.24	1278600000
TGME49_270510	_SFTPGHLEDQVPTSCK_	mitoBirA	3	601.617	-0.47468	4.3809e-06	87.429	78.147	1278200000
TGME49_236210	_DIPQCVDILSDILLNSTIDEEAVQMEK_	mitoBirA	4	772.882	-1.318	1.6135e-09	106.28	101.44	1277700000
TGME49_306220	_EYWFSSYTK_	mitoBirA	2	605.774	0.11282				1277100000
TGME49_288500	_QVDIQTSTELLDLK_	mitoBirA	2	801.933	-0.2072				1277000000
TGME49_204020	_LRPLDFAER_	BirA control	3	372.877	-0.015961	0.0036239	74.849	31.664	1276900000
TGME49_284190	_RFYAPFEATATVK_	BirA control	2	750.896	-0.011469				1276800000
TGME49_284190	_LQVEHTVSEEVTGVDLVK_	APEX control	3	661.353	-1.0876	9.1247e-05	77.899	68.891	1276600000
TGME49_319920	_PTITAFLIK_	mitoBirA	2	502.313	-0.08905	0.0049432	87.258	58.562	1276500000
TGME49_319920	_YNCRPTITAFLIK_	mitoBirA	3	532.957	-0.12373	1.7134e-06	113.54	101.27	1276500000
TGME49_278250	_LPNLSQTGIQLLQEVAEQMPR_	mitoBirA	3	789.09	0.44151	7.9856e-40	183.21	172.66	1276300000
TGME49_306220	_DELFAIPELSTVLR_	mitoBirA	2	801.941	0.22762	5.5536e-05	85.837	75.591	1275600000
TGME49_297810	_AILTQENVDAIR_	mitoAPEX	2	671.87	0.2415	4.954e-08	151.98	113.19	1274700000
TGME49_290840	_APASLLQPLADIFAK_	mitoBirA	2	777.948	-0.15086	1.4816e-19	165.34	124.59	1274700000
TGME49_319920	_KYNCRPTITAFLIK_	mitoBirA	3	575.655	-0.051076	5.2996e-05	81.632	45.339	1274200000
TGME49_219320	_SIDAFNFVSQLPEVR_	mitoBirA	2	861.446	0.0075577	4.9838e-07	96.489	81.698	1273800000
TGME49_243960	_VGSDACASPTVKPAAAEAPELEEK_	mitoBirA	3	809.728	-0.15585	8.8431e-23	148.49	127.88	1273200000
TGME49_244200	_LIACSGQVYYDLIAGK_	mitoBirA	2	885.958	0.68423				1272700000
TGME49_219800	_IPLFSAAGLPHNEIGAQICR_	mitoBirA	3	722.049	-0.1477				1272400000
TGME49_227948	_EVLGTSPEAIR_	mitoBirA	2	586.32	-0.47307				1272000000
TGME49_313140	_SEGGFVWACK_	mitoBirA	2	570.761	-0.98171	0.0015209	87.258	80.327	1271800000
TGME49_202680	_GNVYEGIPLDQSILEPADLR_	mitoAPEX	2	1100.07	0.34577	7.2581e-15	136.96	131.96	1271300000
TGME49_236210	_(gl)QTEEVIFDR_	mitoBirA	1	1119.53	-0.47565	0.0027754	111.06	86.062	1271000000
TGME49_221320	_RLSELGITFIGPSATVMAALGDK_	mitoAPEX	3	783.095	0.10648	1.0046e-05	90.1	81.885	1270900000
TGME49_210690	_GSIVGPDLAVLNLVLVK_	BirA control	2	854.024	-0.28567	5.1595e-05	82.59	76.875	1270900000
TGME49_284560	_ATNVKDEIALTGTDVELVSR_	mitoBirA	3	711.046	-0.81281	1.1924e-21	145.52	135.83	1270000000
TGME49_215350	_DLISIFGAHGYAK_	mitoAPEX	2	696.37	0.5738	0.0047176	59.227	29.684	1270000000
TGME49_313140	_TVVSEAAHGTVTR_	mitoAPEX	3	443.237	-0.03684	1.7199e-05	88.092	57.529	1269800000
TGME49_263300	_AGEFTLSLK_	mitoAPEX	2	483.269	-0.20685	0.0047399	87.806	50.257	1269700000
TGME49_288720	_ESNVATAVTALR_	mitoAPEX	2	616.336	0.31023	5.0621e-05	116.71	93.037	1268900000
TGME49_297810	_GQYTVPSYVADYSPIEIPR_	mitoBirA	2	1078.04	1.1337	3.5001e-06	102.98	89.031	1268900000
TGME49_284190	_FVSYQNAGTVEFLVEGDR_	BirA control	2	1015.99	-0.32123	4.4062e-45	221.13	191.05	1267700000
TGME49_244560	_APEMQIFLK_	mitoBirA	2	538.794	0.16438	0.0045229	88.392	65.487	1267500000
TGME49_251780	_GVNPDEAVAMGAAIQAGVLK_	mitoBirA	3	637.672	0.16811	1.6863e-10	121.44	109.83	1267500000
TGME49_261950	_FLSQPFTVAEVFTGKPGR_	mitoAPEX	3	661.023	-0.0028046				1265600000
TGME49_310490	_LWSLVSPATLEK_	BirA control	2	672.382	0.67017	0.0004852	86.772	71.4	1264500000
TGME49_294800	_VPFVAISGFVGDNMVEK_	BirA control	3	603.647	-0.25167	1.3163e-07	99.069	99.069	1264400000
TGME49_313140	_SEGGFVWACK_	mitoAPEX	2	570.761	-0.54115	0.0018259	85.733	78.788	1264300000
TGME49_209030	_CPEALFQPSFLGK_	mitoAPEX	2	747.376	-0.2424	6.2397e-08	132.93	117.54	1263700000
TGME49_288500	_FGPTALPLPMLER_	mitoAPEX	2	721.397	0.21998	0.00014988	82.069	57.717	1263300000
TGME49_251780	_QAVITVPAYFNDSQR_	mitoBirA	2	854.936	1.1658	1.6642e-09	120.7	103.08	1262600000
TGME49_202680	_VISPQEFCTAIDAVTEADIKR_	mitoAPEX	3	788.402	-0.51354	5.3269e-10	109.85	88.898	1262300000
TGME49_209030	_TTGIVLDSGDGVSHTVPIYEGYALPHAIMR_	mitoBirA	3	1057.2	-0.37663	8.6743e-61	202.33	200.13	1262200000
TGME49_221320	_ATLDSTGAIPR_	APEX control	2	551.299	-0.51992	0.00040392	94.465	66.288	1262000000
TGME49_250770	_NDELTLEGIR_	BirA control	2	580.301	-0.038346	0.00011829	134.57	88.968	1261900000
TGME49_260180	_KVYLDDETTVEQLK_	mitoBirA	2	840.938	0.24731	1.1466e-07	125.5	101.57	1261700000
TGME49_311720	_AKFEELNSDLFQK_	mitoBirA	3	523.603	-0.29317	1.8775e-06	112.44	91.704	1260000000
TGME49_262640	_LNQISYDHNYDWER_	mitoBirA	2	926.916	0.33068	2.7723e-06	110.97	101.74	1259700000
TGME49_299070	_IEKPIALENIAEIVAAADGIMVAR_	mitoBirA	3	836.468	2.1694	6.4409e-05	75.868	69.074	1258200000
TGME49_207720	_LLFTPASPLFK_	mitoAPEX	2	617.366	-3.0585				1258100000
TGME49_292130	_VVVIDCQGHLLGR_	mitoBirA	3	489.27	-0.68663	1.3584e-06	111.52	104.89	1257300000
TGME49_294800	_SVEMHHEVMEQAVPGDNVGFNVK_	mitoAPEX	3	851.734	-0.34356	1.9097e-07	104.18	100.11	1256900000
TGME49_250770	_SQIYDVFK_	BirA control	2	500.261	0.076068				1256400000
TGME49_284190	_LDGAIGASGAVVQPYYDSLLVK_	mitoBirA	3	746.067	0.18504	1.8567e-10	115.74	104.76	1256200000
TGME49_284190	_IDLYQPSTGPGIR_	mitoAPEX	2	708.878	-0.96464	0.00013208	83.53	72.272	1256000000
TGME49_251780	_ISQQAYNQAGSTDSSAGSEGTGSESGDKK_	mitoBirA	3	949.755	0.08291	2.1165e-08	77.149	75.575	1255800000
TGME49_273760	_VIAGPGDKPLIEVTYQGEK_	mitoAPEX	3	672.033	0.24787	3.7889e-07	106.75	99.616	1255600000
TGME49_288500	_LPFAAVHGDPDLVAVGK_	mitoBirA	2	853.467	-0.94309	4.8882e-11	122.75	108.11	1255300000
TGME49_231910	_GTLAVLALSSDK_	mitoBirA	2	587.838	0.31892	8.8225e-05	110.38	78.885	1254600000
TGME49_273760	_LVDFCVQDFK_	BirA control	2	635.81	-0.12382	0.00036054	100.88	93.86	1254300000
TGME49_250770	_LPPDVQVALFSATMPQDILELTTK_	mitoAPEX	3	876.472	0.83001	8.1866e-23	145.25	134.7	1252900000
TGME49_221320	_LQVEHPVSEGVTGVNLPAAQLQVAMGIPLWR_	mitoBirA	3	1103.93	-0.97255	2.4861e-48	176.23	174.06	1252800000
TGME49_284190	_EEELKEAFER_	BirA control	3	427.21	0.23041	0.0085822	58.743	42.769	1252300000
TGME49_226730	_ATVANMAPEYGATMGFFPVDEQTLR_	mitoAPEX	3	906.096	-0.17184	2.1343e-16	127.16	122.63	1252100000
TGME49_218560	_VSFDGTTYTFTK_	BirA control	2	683.83	0.1358	2.641e-06	125.82	116.62	1252000000
TGME49_227948	_LEVTSEDEKEAADAVR_	mitoBirA	3	587.955	0.27116	6.0688e-16	154.69	133.02	1252000000
TGME49_229920	_LADDTPSLQPFMYK_	mitoBirA	2	813.398	-0.90249				1250400000
TGME49_248340	_YIPTLGVEVHPLK_	mitoAPEX	3	489.285	0.2329	5.2605e-05	76.073	63.805	1249900000
TGME49_242840	_GVYPPVAGGPVYWALR_	mitoBirA	3	567.975	0.010675	4.8508e-21	170.95	158.43	1249800000
TGME49_288500	_INPGTGIIFNITPSPGGTTCLGNAELDMR_	mitoBirA	3	1006.17	-0.33509	8.731e-46	185.68	179.32	1249300000
TGME49_245680	_KGDYVDIVCDPSVQK_	mitoBirA	3	574.95	-0.16988	2.0172e-07	92.269	82.711	1249200000
TGME49_284190	_DCDLVSSVFYPAVFDEYQQFLK_	mitoBirA	2	1335.63	-0.21288	1.246e-21	143.93	140.3	1248800000
TGME49_299070	_TEQGADESDAWVEHTAAAVAR_	mitoBirA	3	738.673	-0.25513	2.4017e-15	132.14	102.56	1248400000
TGME49_226730	_EPAPIEDIVDAYCLLNLGDSITTDHISPAGNIAVNSPAAK_	mitoBirA	4	1041.27	-0.27675	2.6314e-35	134.74	133.25	1245000000
TGME49_262690	_YTVSSDMDVK_	mitoBirA	2	572.763	-0.9464	0.0097891	69.721	63.94	1245000000
TGME49_244560	_TLSIIDSGIGMTK_	BirA control	2	668.363	-0.021719	2.4389e-08	137.84	116.78	1244800000
TGME49_306670	_FQNSIVDNEPDYLGSHPWGVRPK_	mitoBirA	3	885.77	0.021753	3.3925e-31	166.49	157.47	1244700000
TGME49_311720	_DKDLLPYEIINK_	BirA control	3	487.605	0.34246	3.0756e-07	136.27	119.06	1244600000
TGME49_312160	_PRPTQYQTEICNQATNVQPGVEKDPTK_	mitoBirA	3	1033.84	-0.22614	1.3155e-12	116.2	113.85	1244600000
TGME49_221320	_QPVFIYIPPHGELR_	mitoAPEX	3	555.975	0.19257	0.0078668	43.548	40.522	1244500000
TGME49_221320	_IKVEWNDASNPSLGFK_	BirA control	2	902.965	0.47124	5.807e-11	136.39	125.66	1243300000
TGME49_202680	_GIVMEDVGR_	mitoAPEX	2	488.25	0.57669	0.0090341	76.221	39.826	1243200000
TGME49_297810	_AQIAVDNNIPVNFQSLDYFDR_	mitoBirA	2	1220.1	-2.1568				1243100000
TGME49_319920	_NVQDLNVLEIQAELHR_	mitoAPEX	3	631.006	-1.145	4.7939e-08	104.26	62.636	1242900000
TGME49_273760	_EAVITVPAYFNDSQR_	mitoAPEX	2	855.428	1.0741				1242300000
TGME49_215590	_AGLPLEDLEFVQFHPTGIFPAGCLITEGCR_	mitoAPEX	3	1115.55	-0.66357	9.6461e-17	114.06	111.82	1242200000
TGME49_300140	_AQSDLAQALNAVDAHLK_	mitoBirA	3	588.979	-0.32082	2.5796e-25	161.19	151.19	1241100000
TGME49_268830	_LRDGAQEVQTVIER_	mitoBirA	2	807.434	-0.031439	1.1395e-05	114.01	84.395	1241000000
TGME49_299070	_FATESTDNLVVLGR_	mitoAPEX	2	761.399	0.45698	4.5292e-08	127.71	114.92	1240400000
TGME49_299070	_SGEPLDLPVFTSTK_	mitoBirA	2	745.89	0.1691	5.0229e-06	104.95	90.323	1240200000
TGME49_221320	_IVDFSGLLDLPR_	mitoBirA	2	672.88	0.56775	2.8168e-08	154.28	89.102	1239900000
TGME49_244200	_ALDAPVFHVNADDPEAVTFVSELALEYR_	mitoAPEX	3	1030.18	-0.07962	8.4445e-09	91.819	85.204	1239500000
TGME49_250770	_DFTVSSMHGDMDQK_	mitoBirA	2	799.335	-0.99069	1.1439e-12	156.6	8.1239	1239100000
TGME49_311720	_DKDLLPYEIINK_	BirA control	3	487.605	0.2318	6.1994e-07	130.56	111.47	1239000000
TGME49_249900	_M(ox)LIQTQDSIPEIK_	mitoAPEX	2	766.405	-0.037529	1.9675e-06	120.84	100.05	1238500000
TGME49_210690	_MGAEVAGDSIGDEFK_	mitoBirA	2	763.346	0.14864				1237700000
TGME49_219550	_SSVPQPAPSVSPPKPAPAPK_	mitoBirA	2	970.036	0.40588	1.4437e-08	112.55	109.07	1237700000
TGME49_320220	_AVGFAENVPNPESTNSDSHPDFR_	mitoAPEX	3	829.711	-0.11494	4.2526e-31	160.57	153.69	1237300000
TGME49_209030	_AVFPSIVGK_	BirA control	2	459.276	0.39048				1237100000
TGME49_221320	_LAMEGYEQDVESTVQK_	mitoBirA	3	609.621	-0.12216	3.5698e-11	124.16	114.32	1236800000
TGME49_244560	_ELISNAVDALEK_	BirA control	2	651.351	0.14564	1.9379e-06	130.1	80.798	1235900000
TGME49_309752	_EVGFDKPVVLR_	mitoBirA	3	420.243	-1.0745	0.0028476	64.103	48.474	1235900000
TGME49_236210	_RMPLAEFLK_	mitoAPEX	2	552.815	-0.012101				1235700000
TGME49_221320	_YIHDLASLNTVSQEVVYEDQR_	mitoAPEX	3	827.075	0.013071	3.3017e-11	123.83	103.36	1235100000
TGME49_299070	_GLGDIESVSHTASPGSSVVR_	mitoAPEX	3	652.332	-0.1106	6.1455e-11	123.55	103.5	1234800000
TGME49_273760	_VIAGPGDKPLIEVTYQGEK_	BirA control	3	672.033	0.22743	0.00012193	85.087	77.955	1234500000
TGME49_268830	_HHFYSQYQPGVVDPEAPQEVEAFK_	mitoBirA	4	701.334	-0.062359	5.6204e-23	147.87	141.65	1234200000
TGME49_261950	_(gl)QIAELGIYPAVDPLDSTSR_	mitoBirA	2	1014.52	0.11117	1.3228e-14	126.25	116.34	1233700000
TGME49_268890	_GLTINECLAK_	mitoAPEX	2	559.797	-1.1324	0.0015929	86.898	64.905	1233100000
TGME49_250770	_LPPDVQVALFSATMPQDILELTTK_	BirA control	3	876.472	0.43394	3.1125e-11	120.63	113.35	1232700000
TGME49_202680	_TVASPVYTGGDVR_	mitoBirA	2	661.341	-1.1852	0.001153	70.889	37.8	1232300000
TGME49_210690	_LNLANPQAGMQK_	mitoBirA	2	642.84	0.20561	0.00011252	107.11	76.385	1231600000
TGME49_288500	_LPFAAVHGDPDLVAVGK_	mitoBirA	2	853.467	0.34741				1231100000
TGME49_288500	_MALAVGDTECEFMEK_	mitoBirA	2	865.875	-0.85192	5.3586e-07	95.57	90.196	1229700000
TGME49_261570	_LKVPPAINQFTHTLDK_	mitoBirA	3	608.012	-0.95804	7.3252e-06	86.772	75.129	1229600000
TGME49_232230	_VSCLAVTDPGDSDIIR_	mitoBirA	2	859.425	0.13812	2.5794e-11	130.29	116.88	1228900000
TGME49_320050	_ILGLHVADYMR_	BirA control	3	429.901	0.022827	0.0030879	59.265	40.133	1228300000
TGME49_292920	_ENMQNSVLIEK_	mitoBirA	2	652.829	-0.93259	1.5467e-05	142.08	119.44	1228000000
TGME49_311720	_AKFEELNSDLFQK_	BirA control	3	523.603	-0.019888	2.8214e-06	107.53	95.374	1228000000
TGME49_313140	_LSNSNWEHYAASEHNSSVDDHDDNQR_	mitoBirA	4	757.568	-0.11502	3.7496e-09	95.652	95.287	1227900000
TGME49_292920	_MASLPVNLELNPHHQMITSLYHLQR_	mitoAPEX	5	589.308	-0.20459				1227800000
TGME49_209260	_LRGEAVILDPATLPQK_	mitoAPEX	2	861.001	0.25496	0.001637	71.354	45.9	1227500000
TGME49_234420	_QNEVWLEQQHQQFLR_	mitoAPEX	3	661.666	-0.0034707	1.2184e-11	130.2	112.57	1227200000
TGME49_292920	_SGSLEFLMK_	mitoBirA	2	506.263	-0.41684	0.0026034	101.65	80.118	1225900000
TGME49_313140	_DQTEDKVTLEAAEAIKK_	mitoAPEX	3	630.334	0.77146	8.778e-20	149.97	138.05	1225900000
TGME49_251950	_SGGPTFNAAAAAGR_	mitoBirA	2	624.31	-0.68086				1225600000
TGME49_284190	_YLATVIVNGPLTPLVNADACPDK_	mitoBirA	2	1221.14	0.32266				1225300000
TGME49_319920	_LADIGEGIAQVELLK_	mitoBirA	3	523.635	-0.28881	1.2519e-08	107.35	77.436	1223400000
TGME49_270510	_SFTPGHLEDQVPTSCK_	BirA control	3	601.617	-0.18025	0.00012325	66.826	59.315	1223300000
TGME49_232300	_RGPANPLPDTIIVMDPKPEIPVVQPEEMDEGVLGPM_	mitoBirA	3	1294.32	-0.29866	5.3057e-22	110.23	109.58	1222800000
TGME49_288380	_QNNTLTIEDDGIGMTK_	mitoBirA	2	875.42	1.0164				1222500000
TGME49_264040	_EWLLDLPPFSR_	mitoAPEX	2	686.867	0.15784	1.06e-06	159.09	137.09	1222100000
TGME49_204020	_LRPLDFAER_	mitoAPEX	2	558.812	0.27164				1221100000
TGME49_263530	_SDDLIAIVQE_	mitoBirA	2	551.785	0.12272	0.00020441	120.45	105.31	1220600000
TGME49_239330	_TCGACGYPNAK_	BirA control	2	599.753	-1.1542	0.00035127	97.813	89.681	1219900000
TGME49_215590	_AYQSCTSAHTCTGDGGGMVSR_	mitoAPEX	3	734.97	-0.5576	2.2728e-10	118.32	111.55	1219700000
TGME49_322210	_YTSEASCAFASVQHLVR_	mitoBirA	3	642.644	0.54353	5.4165e-17	140.22	135.87	1219700000
TGME49_313140	_DLALCVK_	mitoBirA	1	818.444	0.0075529				1219500000
TGME49_299070	_AEVSDVANAVYDGADAVMLSGETAAGNAPAR_	mitoAPEX	3	998.137	-0.7131	2.3351e-60	192.22	185.6	1219400000
TGME49_221320	_VDDVLKELDK_	BirA control	3	391.884	-1.187	0.0011005	78.342	56.314	1219200000
TGME49_288500	_MALAVGDTECEFMEK_	mitoBirA	2	865.875	-0.76997	4.0273e-09	114.64	105.84	1218700000
TGME49_221320	_GFPIDALHTELFEVETQDGSK_	mitoAPEX	3	778.381	-0.8348	8.6237e-07	100.28	93.779	1218300000
TGME49_288720	_GPLANTFPSAADITLPVA_	BirA control	2	877.97	-0.014328	2.0821e-06	102.65	92.577	1218100000
TGME49_261950	_EGNDLYHEMMTTGVIK_	mitoBirA	2	919.427	-0.42342	1.5114e-29	200.58	169.49	1217700000
TGME49_319920	_PTITAFLIK_	mitoBirA	2	502.313	0.20885	0.0012103	130.66	69.745	1217600000
TGME49_214790	_MGVDPELCDFIDR_	mitoAPEX	2	783.85	-0.53193	1.1978e-07	125.53	118.84	1217500000
TGME49_204020	_LRPLDFAER_	mitoBirA	2	558.812	-2.0431				1217400000
TGME49_206470	_NLGLEELGIETDR_	mitoBirA	2	729.875	0.085245	3.7652e-11	148.41	131.38	1217100000
TGME49_314400	_AAVDEVPTGDYELPLSHADIVK_	mitoAPEX	3	780.397	0.10441	1.3265e-10	118.32	99.696	1216800000
TGME49_284190	_TAAIPPPLPSSVER_	mitoBirA	2	717.901	-0.83604	0.00080753	69.92	51.097	1216200000
TGME49_244200	_GHEIAAVNPLSLPQETPFVSGSR_	mitoAPEX	3	802.752	-0.94216	1.566e-22	143.91	136.49	1215800000
TGME49_232230	_LIIISNNCPALR_	BirA control	2	692.392	-0.33659	6.8938e-10	164.64	131.05	1215700000
TGME49_227948	_YPVKEPFAELLK_	mitoBirA	3	478.606	0.49707	8.1817e-05	92.856	80.588	1215300000
TGME49_284190	_YLATVIVNGPLTPLVNADACPDK_	mitoBirA	2	1221.14	-0.52534				1214900000
TGME49_209030	_TTGIVLDSGDGVSHTVPIYEGYALPHAIMR_	BirA control	4	793.155	-1.0641	0.0028627	41.65	37.345	1214300000
TGME49_247770	_SGAIKPIGSQQFNPAGK_	mitoBirA	2	850.46	0.52765	0.0014282	72.433	63.772	1214000000
TGME49_226970	_NVTCHLSPCFEQVK_	mitoBirA	3	573.604	-0.29501	6.2518e-06	89.911	83.706	1213600000
TGME49_320220	_FDQADHPSLWQLEEEQQR_	mitoBirA	2	1128.52	-0.48474	2.3441e-31	174	169.75	1212400000
TGME49_215590	_LGANSLLDLVVFGR_	mitoAPEX	2	737.425	-0.65786				1212100000
TGME49_320050	_VLLDVGIVR_	mitoAPEX	2	492.316	-0.0045895	0.0029026	95.502	41.344	1211400000
TGME49_251780	_SQVFSTAADNQTQVGIK_	mitoBirA	2	897.455	-0.74879	8.4199e-05	76.301	64.982	1209900000
TGME49_288720	_ADVDEFPGVAHLVSDEYEQISSEALEAAR_	BirA control	3	1049.83	-0.034225	2.0093e-10	92.363	87.668	1209700000
TGME49_204020	_NAALTIGNILPLNK_	BirA control	2	726.433	0.078289	7.9849e-06	98.942	58.665	1208800000
TGME49_309752	_GGTSIEDIAHNYPESIHK_	mitoAPEX	3	656.653	0.16829	0.00037075	69.979	66.644	1208600000
TGME49_221320	_QGDLTGAEAPLR_	mitoBirA	2	614.32	0.15772	1.0028e-07	146.5	112.63	1207300000
TGME49_292920	_AVFYIPEDPPSR_	mitoAPEX	2	695.854	0.27003				1205900000
TGME49_254030	_VWQEWWPYDPQPQPQTTNPYLVHCEK_	mitoBirA	3	1109.52	-0.14014				1205300000
TGME49_230410	_TAPAEGGIGQLR_	mitoBirA	2	585.317	0.083387				1205100000
TGME49_264040	_ASTVSSSQTGTAGSESISDK_	mitoBirA	3	633.964	0.18652	2.3932e-05	90.453	82.59	1203800000
TGME49_320140	_GNCSGQYEELHVCIDR_	mitoBirA	3	646.281	0.042283	5.9742e-06	85.563	83.089	1203200000
TGME49_311720	_LKDVEAVCNPIISK_	mitoBirA	2	793.435	0.13399	6.9597e-06	118.31	102.76	1202800000
TGME49_247550	_VELEKPFVLLYDK_	mitoAPEX	3	531.636	0.037158				1200400000
TGME49_236210	_IILPTEKPFFCGSELLHR_	mitoAPEX	3	719.722	0.08331	5.953e-10	110.74	104.3	1200100000
TGME49_219800	_IPLFSAAGLPHNEIGAQICR_	mitoBirA	3	722.049	-1.1134	3.1373e-23	156.73	144.8	1199600000
TGME49_313390	_VDISGVDVSSIKDEQFGASK_	mitoBirA	3	694.351	0.5716	2.6729e-10	121.21	89.053	1199400000
TGME49_213350	_NCAFGEKPEPVNTHLR_	BirA control	4	467.982	-0.53908	0.00015784	64.04	60.688	1199100000
TGME49_254030	_VWQEWWPYDPQPQPQTTNPYLVHCEK_	mitoBirA	3	1109.52	-0.17343				1198900000
TGME49_284190	_FIDEHNELLFYDPLDMSSQNICK_	BirA control	2	1414.65	-0.062173				1198600000
TGME49_251780	_SQVFSTAADNQTQVGIK_	mitoAPEX	3	598.639	0.17045	1.4191e-05	80.361	69.593	1198500000
TGME49_239490	_SAVIGGIFDDVYDKEPWNLR_	mitoAPEX	3	765.387	0.18569	1.5721e-06	101.17	86.807	1198500000
TGME49_244560	_APEMQIFLK_	BirA control	2	538.794	0.15572	0.0073537	80.755	62.083	1198200000
TGME49_231410	_AATPEELVELK_	mitoBirA	2	600.33	-0.68154	0.00039918	94.767	74.561	1198100000
TGME49_304990	_DFASADVCEEELR_	mitoBirA	2	770.833	0.66265				1197900000
TGME49_247550	_VGGASEVEVGEAK_	mitoAPEX	2	616.312	-0.22407	1.3622e-17	179.93	151.73	1197800000
TGME49_284190	_(gl)QGASLPALGLSQESILSAVQTDPR_	mitoBirA	3	807.759	0.21734	4.7649e-16	131.94	127.52	1197200000
TGME49_245620	_CGLTYILNAEE_	mitoBirA	2	641.803	-1.381	1.0064e-06	159.83	135.74	1197100000
TGME49_247550	_TLTHELELVEGLK_	mitoAPEX	3	494.612	-0.18911	1.109e-08	134.61	111.73	1197000000
TGME49_289690	_GIISYTDEEVVSSDFVHCK_	APEX control	3	729.009	-1.065	3.0571e-10	118.72	113.46	1196900000
TGME49_251780	_GDVVGIDLGTTNSCVAVMEGSQPK_	mitoAPEX	3	812.058	-1.3811	2.8506e-07	97.352	87.597	1196400000
TGME49_313140	_VTASDYLTTEEFMDAISDTLK_	mitoAPEX	3	784.038	-0.31121	9.1419e-16	137.61	132.35	1195900000
TGME49_268890	_AAVEAALDALAEK_	mitoAPEX	2	636.346	0.29005				1195400000
TGME49_292920	_TFTLQDTGVGMTK_	mitoAPEX	2	699.85	-0.35281				1195300000
TGME49_204020	_GMVGIVAGGGR_	mitoAPEX	2	487.266	0.44933				1195300000
TGME49_250770	_KLPPDVQVALFSATMPQDILELTTK_	BirA control	3	919.17	-1.0117	9.0794e-06	80.664	77.132	1194600000
TGME49_312160	_PTQYQTEICNQATNVQPGVEKDPTK_	mitoBirA	3	949.459	-0.049824	5.2835e-67	214.16	205.77	1194600000
TGME49_270510	_DAAAAAAEPLIPLTK_	BirA control	2	726.409	-0.75299	6.1966e-09	109.07	98.649	1194500000
TGME49_320220	_KHLDQEVTDVSQLVEPVSSPHQTEGWFK_	mitoBirA	4	805.903	0.37852	4.7001e-34	160.57	150.39	1194000000
TGME49_268830	_DVERPTQAVQTLLGHLEATGR_	mitoBirA	3	764.408	-0.39658				1192900000
TGME49_232300	_FKDGYLISTGEPSK_	mitoBirA	3	514.6	0.30806	0.002277	57.288	49.715	1192400000
TGME49_216180	_ALQQHVVIPLK_	mitoBirA	3	415.927	0.024078	0.00031676	82.261	49.846	1192300000
TGME49_215460	_VSDSQSIVVFGLK_	BirA control	2	689.882	0.27397	2.1875e-14	170	145.65	1192000000
TGME49_289690	_FGIVEGLMTTVHAMTANQLTVDGPSK_	mitoAPEX	3	906.459	-0.19956	1.4466e-44	187.17	180.55	1191900000
TGME49_290600	_LIGPNCPGIIKPGECK_	mitoBirA	3	584.976	0.42496	1.0036e-09	109.79	95.002	1191500000
TGME49_314400	_VTGYDTPFPLAFEPFYLPDER_	mitoAPEX	3	825.402	-0.18178				1191300000
TGME49_292920	_GDTMPTGVAEDDKAQPDSSSAQTDSTAGSEVEPR_	mitoAPEX	3	1146.17	0.23384	2.294e-27	125.79	123.7	1191300000
TGME49_319920	_KYNCRPTITAFLIK_	mitoBirA	3	575.655	-1.035	6.0523e-05	79.875	49.308	1191000000
TGME49_311720	_NAVVTVPAYFNDAQR_	BirA control	2	832.923	-0.42507				1190700000
TGME49_229250	_VSSELLWQCVR_	BirA control	2	688.853	-0.07824	6.2388e-17	212.82	193.45	1190500000
TGME49_221320	_IRDILSSLPESER_	mitoAPEX	2	757.912	0.11771	4.5554e-07	129.77	98.175	1189900000
TGME49_276140	_QDLPNAMTAAEVTDK_	BirA control	2	802.385	-0.65466	3.1414e-07	101.01	89.964	1189700000
TGME49_228470	_VLNSYWVGQDAVYK_	mitoBirA	2	821.417	0.81408	1.1774e-05	92.269	81.527	1189600000
TGME49_288500	_QVDIQTSTELLDLK_	mitoAPEX	2	801.933	0.29604				1189500000
TGME49_255060	_IFNWLGTYMASHNTTR_	mitoBirA	3	637.977	-0.086876				1189500000
TGME49_232300	_RGPANPLPDTIIVMDPKPEIPVVQPEEMDEGVLGPM_	mitoBirA	4	970.994	0.49472	1.334e-08	64.885	64.379	1189300000
TGME49_204400	_HCVIIYDDLSK_	mitoBirA	2	681.84	-0.19941				1188000000
TGME49_289690	_SSDVIVSNASCTTNCLAPLAK_	mitoBirA	2	1104.54	-0.41667	4.1918e-16	140.63	130.28	1187700000
TGME49_263530	_SDDLIAIVQE_	mitoAPEX	2	551.785	0.015396	0.00022785	110.53	103.84	1187700000
TGME49_209260	_TMPEDFELPSDTMPK_	mitoAPEX	2	869.389	-0.21684	2.007e-07	103.79	100.29	1187600000
TGME49_250770	_NDELTLEGIR_	BirA control	2	580.301	0.14373	0.00025756	107.06	79.752	1187600000
TGME49_232090	_SALFSYLDAVTPPSTILATNTSSLSITK_	mitoBirA	3	966.85	0.11647	4.4688e-13	109.08	103.5	1187400000
TGME49_268890	_AIGIACQYVWDR_	mitoAPEX	2	726.359	-0.16873	0.0025115	71.176	58.907	1187000000
TGME49_221320	_ATLDSTGAIPR_	mitoBirA	2	551.299	0.50743	0.0013428	82.954	60.926	1187000000
TGME49_309752	_SKDCTQIEVNPLVETHDGR_	mitoBirA	3	733.355	-0.27434	1.7046e-32	178.03	162.59	1186600000
TGME49_263300	_YCVSDVTTEVK_	mitoBirA	2	650.808	-0.25659	0.0016039	80.245	72.879	1186300000
TGME49_231910	_GTLAVLALSSDK_	mitoBirA	2	587.838	-0.61196	7.3326e-08	149.41	112.07	1186300000
TGME49_254030	_PLCNGTHLWVK_	mitoBirA	3	442.233	-0.15464	0.0074961	54.784	34.577	1186200000
TGME49_288380	_AELVNNLGTIAR_	mitoBirA	2	635.859	-0.095756	2.8827e-07	140.14	100.87	1185500000
TGME49_221320	_IGLYENLKDK_	APEX control	3	398.224	-1.0256	0.0028775	70.942	49.79	1185300000
TGME49_236210	_MVVAAAGDVDHKELTALVEK_	mitoBirA	3	699.373	-1.0494	7.5928e-15	128.38	120.17	1185200000
TGME49_288720	_VDIGQILMSIR_	mitoBirA	2	622.855	-0.38378	6.6561e-17	212.2	164.36	1184300000
TGME49_221320	_IRDILSSLPESER_	mitoBirA	3	505.611	-0.14553	1.9609e-06	111.88	90.481	1183600000
TGME49_284190	_DCDLVSSVFYPAVFDEYQQFLK_	BirA control	2	1335.63	1.11	1.1158e-09	112.58	110.42	1182800000
TGME49_219320	_LAPADATEAAAAENHGYPK_	mitoBirA	3	632.974	-1.0866	0.0006287	70.094	65.568	1182300000
TGME49_263080	_PAPAASGAAAVLSK_	mitoBirA	2	605.843	0.1081	8.8318e-06	97.223	58.044	1182300000
TGME49_244560	_QDLINNLGTVAK_	BirA control	2	643.359	0.26573	2.2668e-06	128.1	80.942	1181700000
TGME49_249900	_YFPTQAFNFAFK_	APEX control	2	740.867	-0.86017	0.00011252	107.11	86.73	1181300000
TGME49_206470	_VIISSTGALALDK_	mitoBirA	2	644.38	0.76192	0.00079803	72.891	46.105	1179500000
TGME49_292920	_GDTMPTGVAEDDKAQPDSSSAQTDSTAGSEVEPR_	mitoBirA	3	1146.17	0.39753	5.9628e-18	93.956	88.29	1179500000
TGME49_288720	_VDIGQILMSIR_	BirA control	2	622.855	-0.32401	4.4082e-05	127.56	101.94	1179400000
TGME49_221320	_DILSSLPESER_	mitoBirA	2	623.32	-0.91055	7.6546e-06	127.87	97.476	1178800000
TGME49_221320	_GEVSPSSPSTGPGAASAQGASSTSK_	BirA control	3	735.68	-0.14079	2.4371e-06	89.297	85.864	1178800000
TGME49_284190	_AHDFPEAVAR_	BirA control	3	371.521	0.12135	0.00013464	91.867	73.427	1178700000
TGME49_236210	_(gl)QTEEVIFDR_	mitoBirA	1	1119.53	0.086485	0.0023583	118.71	93.713	1178100000
TGME49_311720	_VTEAQEWLNTNPDADAEETRDK_	mitoBirA	3	844.721	0.49242	1.2445e-56	219.78	214.31	1177900000
TGME49_259710	_FTCVTSLDAK_	mitoBirA	2	571.282	0.62637	0.00021251	117.02	92.801	1177800000
TGME49_284190	_(gl)QIGFPVMLK_	mitoBirA	1	1015.56	-0.25093				1177200000
TGME49_220400	_(ac)ASGMGVDENCVAR_	mitoAPEX	2	704.303	-0.071641	6.6968e-08	130.1	117.09	1177000000
TGME49_244200	_MYNLISK_	mitoAPEX	2	434.733	0.045325				1176800000
TGME49_221320	_FFFLELNPR_	BirA control	2	591.819	0.34328	0.0029026	95.502	76.523	1176700000
TGME49_284190	_GTNAVGYTACPDNSVEAFCR_	mitoBirA	3	730.318	-0.74674	3.4817e-22	152.13	144.59	1174700000
TGME49_313140	_LGQFCLALEHACIQTVENGAMPK_	mitoBirA	3	863.087	-1.3793	2.6155e-53	192.58	181.19	1174200000
TGME49_231910	_ENEMAGNAVQVYGVGDK_	mitoBirA	2	890.912	-0.20463	5.6538e-25	167.38	160.97	1174000000
TGME49_230410	_IAPDFTADAVMPNGEIQK_	mitoBirA	3	639.652	0.14891	0.0022109	54.292	44.972	1174000000
TGME49_209260	_GEAVILDPATLPQK_	mitoAPEX	2	726.409	0.10931	0.00077008	70.26	60.609	1173900000
TGME49_236210	_QTEEVIFDR_	mitoAPEX	2	568.783	0.22802				1173800000
TGME49_209030	_NPGIMVGMEEK_	mitoAPEX	2	602.789	-0.46383	4.3009e-05	128.08	108.98	1173500000
TGME49_250770	_LFIMDEADEMLSR_	APEX control	2	785.368	-1.3147	4.5689e-12	156.14	145.19	1173500000
TGME49_221320	_LDALDPNTQAYLALPR_	mitoAPEX	2	885.973	0.037568	6.0462e-07	96.247	80.733	1173100000
TGME49_230410	_HLTVNDLPLGR_	mitoBirA	3	412.235	-0.11657				1172500000
TGME49_294800	_EHALLAFTLGVK_	mitoBirA	3	433.587	-0.059325	1.9918e-07	136.5	122.56	1172300000
TGME49_242840	_GVYPPVAGGPVYWALR_	mitoAPEX	2	851.459	0.052614	1.7039e-05	88.075	80.465	1172200000
TGME49_221320	_NVCLFALTTPMDFGTEEEK_	BirA control	3	734.675	0.53409	7.094e-10	110.74	101.26	1170400000
TGME49_221510	_VLHVMDSQLVK_	mitoBirA	3	423.573	-0.34082	5.1913e-05	105.46	89.831	1170300000
TGME49_226730	_GFGLSEEQAEK_	mitoAPEX	2	597.785	0.086002	2.6691e-05	136.02	123.96	1170100000
TGME49_226730	_VPLSEVKEDFQVSLR_	mitoBirA	3	582.653	0.37351	4.6049e-11	124.62	116.02	1169800000
TGME49_221320	_VTAENPDEGFKPTSGR_	mitoBirA	3	568.944	-0.53692				1169600000
TGME49_232090	_DIDTIMK_	mitoBirA	2	418.215	0.072695				1169600000
TGME49_301120	_(ac)ASTQVASLHAQPLLR_	mitoBirA	2	817.455	0.031267	1.8388e-19	160.81	149.86	1169200000
TGME49_232300	_FKDGYLISTGEPSK_	BirA control	3	514.6	0.36852	0.00012519	73.834	55.443	1168900000
TGME49_228470	_VLNSYWVGQDAVYK_	BirA control	2	821.417	-0.82632	1.8447e-06	115.68	107.12	1168900000
TGME49_219800	_IPLFSAAGLPHNEIGAQICR_	mitoBirA	3	722.049	-0.022662				1168400000
TGME49_221320	_TGVMGAFQSLEEVQEVGDR_	mitoAPEX	3	684.662	-0.36934	1.4129e-26	169.43	153.7	1168400000
TGME49_230410	_IAPDFTADAVMPNGEIQK_	mitoBirA	3	639.652	-0.40512	0.0015832	56.817	49.44	1168400000
TGME49_221320	_GFPIDALHTELFEVETQDGSKK_	APEX control	4	616.062	-1.0791	0.00032018	69.088	66.8	1167200000
TGME49_206470	_NLGLEELGIETDR_	mitoBirA	2	729.875	-1.0129	6.5307e-06	110.44	93.966	1166200000
TGME49_221320	_NNYANVDLICQIAVQEK_	BirA control	3	664.667	-0.064064	8.9716e-26	169.15	169.15	1165500000
TGME49_244560	_APEMQIFLK_	mitoBirA	2	538.794	0.26049	0.0023817	106.2	79.31	1164900000
TGME49_219550	_SHVDISVAVATPTGLMVPVVR_	mitoBirA	4	537.802	-0.090031	3.0792e-15	128.1	125.92	1164900000
TGME49_228470	_VLNSYWVGQDAVYK_	mitoAPEX	2	821.417	0.37235	1.382e-05	91.969	78.223	1164800000
TGME49_261950	_IPSAVGYQPTLATDLGQLQER_	mitoAPEX	2	1129.09	-0.2763	1.584e-21	149.18	139.42	1164400000
TGME49_320050	_NKIEADDIEAMYK_	mitoBirA	2	770.372	-0.040006				1164400000
TGME49_299070	_EAGKPVVVATQMLESMMQAPLPTR_	mitoAPEX	3	862.115	-0.033414	3.3779e-07	99.6	95.295	1163800000
TGME49_214790	_TIQSEIQHEQSTYEQDADLKK_	mitoAPEX	4	623.554	0.12801	7.3106e-05	82.635	76.132	1163400000
TGME49_215280	_KDPNVENLQSIEDR_	mitoBirA	3	552.944	-0.17268	7.5904e-07	108.38	94.59	1162900000
TGME49_231910	_FPWNFGQACIIADR_	mitoBirA	2	847.909	-0.91879				1162600000
TGME49_226730	_VPLSEVKEDFQVSLR_	mitoBirA	3	582.653	0.49851	3.9264e-06	88.311	75.389	1162100000
TGME49_270510	_LAALLDGGEASVEK_	mitoBirA	2	686.87	-1.1593	5.5749e-06	103.83	77.717	1161500000
TGME49_265370	_(ac)MQSAEITALESPAIK_	mitoAPEX	2	815.921	-0.15024	4.9366e-24	180.74	170.38	1161000000
TGME49_204020	_MPEGTVVSNVEEK_	BirA control	2	709.845	0.22294	2.6778e-21	201.76	170.41	1160900000
TGME49_221320	_LSVSSHQGSWLHTK_	BirA control	4	392.456	-0.10024	0.00018031	68.972	62.139	1160800000
TGME49_294800	_GCATFLAQVIVLNHPGEIK_	BirA control	3	689.707	-0.0064372	0.00018243	76.118	74.121	1160600000
TGME49_261950	_QIAELGIYPAVDPLDSTSR_	mitoAPEX	2	1023.03	-0.042543	5.4333e-38	190.96	175.77	1160000000
TGME49_313390	_VDISGVDVSSIKDEQFGASK_	mitoBirA	3	694.351	-0.67006	1.5065e-06	101.48	97.615	1159100000
TGME49_299070	_IEKPIALENIAEIVAAADGIMVAR_	mitoAPEX	3	836.468	1.9401	0.0018597	47.577	37.43	1158900000
TGME49_204020	_TSGTYATIVGHSDDGSK_	mitoBirA	3	565.932	0.12192	1.1107e-15	125.45	120.08	1158800000
TGME49_221320	_YIHDLASLNTVSQEVVYEDQR_	APEX control	3	827.075	-0.651	2.161e-55	211.16	188.92	1158600000
TGME49_221320	_FVLDAIIGDPDKFIGVENLR_	mitoBirA	3	744.407	0.58786	1.0157e-21	147.25	137.98	1158200000
TGME49_313140	_AESLVCDGPGDFTISFTPAGGSR_	mitoAPEX	2	1171.04	-0.69633	1.7318e-65	206.85	189.92	1158200000
TGME49_294800	_EHALLAFTLGVK_	mitoAPEX	2	649.877	1.8072	2.641e-06	125.82	106.16	1158100000
TGME49_220400	_(ac)ASGMGVDENCVAR_	APEX control	2	704.303	-1.3875	1.3709e-21	196.38	177.25	1156100000
TGME49_263530	_TGEFIPPCVQVGQTVVVPEYGGMK_	mitoBirA	2	1296.65	-0.55938	3.0504e-15	127.16	118.98	1156100000
TGME49_206470	_LDAGHIILATGSEASPLPGNVVPIDEK_	mitoAPEX	3	905.152	0.020021	1.4814e-25	152.88	147.18	1155800000
TGME49_284190	_ELGITSVGIYSQEDSQALHR_	mitoBirA	2	1102.05	-0.60399	3.2155e-39	186.45	172.82	1155700000
TGME49_284190	_NFGDVSMLPTAAYFTGLQPGESITVHMAGR_	mitoBirA	3	1056.51	-0.36121	9.9161e-38	158.73	149.97	1155600000
TGME49_232090	_HSQVALLDISETQLQR_	mitoBirA	2	919.492	-0.76112	4.5067e-24	176.21	161.02	1155400000
TGME49_311720	_DKDLLPYEIINK_	BirA control	2	730.903	0.018888	2.4733e-08	156.81	131.08	1155100000
TGME49_221320	_LFLHIVSPLNLASAK_	mitoBirA	2	811.985	-0.97161	5.6224e-09	110.55	104.83	1154700000
TGME49_251780	_IINEPTAAALAFGMDKDDGK_	mitoAPEX	2	1039.02	0.42985	1.1672e-20	149.93	139.31	1154500000
TGME49_319920	_ELLENPAMMLLHLR_	mitoAPEX	3	560.637	-1.3892	5.8664e-07	111.79	63.225	1153600000
TGME49_227948	_LFKPGEPFSGSTAVATR_	mitoBirA	3	588.981	-0.85701	1.006e-07	103.67	94.535	1152900000
TGME49_311720	_DKDLLPYEIINK_	mitoBirA	3	487.605	0.023753	3.6629e-05	107.39	90.175	1152900000
TGME49_202680	_GNVYEGIPLDQSILEPADLR_	mitoAPEX	3	733.715	-0.041596	2.1106e-06	93.849	83.708	1152700000
TGME49_221320	_LSELGITFIGPSATVMAALGDK_	BirA control	2	1096.09	-0.057654	2.6923e-30	163.95	153.39	1152300000
TGME49_222910	_VPSPTSKPSSPDETSQAAEEASSSTCEATQK_	mitoBirA	3	1065.48	-0.10416	2.3652e-22	135.02	134.26	1152000000
TGME49_221320	_GFPIDALHTELFEVETQDGSKK_	BirA control	3	821.08	0.19064	1.0649e-06	92.792	88.368	1151300000
TGME49_237120	_SVGFQYPTTLR_	mitoAPEX	2	634.835	1.8763	0.00096837	86.838	61.985	1151200000
TGME49_206470	_FCVPNYPNIR_	mitoAPEX	2	640.316	-0.44558	0.00045017	95.502	86.801	1150900000
TGME49_320050	_VLATAESTELPR_	APEX control	2	643.851	-1.4219	6.7342e-08	150.06	116.18	1150800000
TGME49_235880	_GAAEASVLASSWDYVK_	mitoBirA	2	827.41	0.080799	3.0759e-09	109.48	99.908	1150000000
TGME49_218560	_LASEGLPIDAPR_	BirA control	2	619.841	0.44594	0.00017687	100.22	55.375	1149900000
TGME49_260180	_VFEDADNVAMAVR_	mitoBirA	2	718.846	-0.044335	6.0507e-08	133.18	119.85	1149500000
TGME49_221320	_NNYANVDLICQIAVQEK_	APEX control	3	664.667	-1.1895	1.6203e-32	186.85	180.73	1149300000
TGME49_273760	_FDDPSVQSDMK_	mitoBirA	2	634.777	0.45559	2.1341e-05	138.63	131.35	1149300000
TGME49_320050	_YSAQFSQYIK_	mitoAPEX	2	617.809	0.59429	0.00038238	99.568	68.956	1148800000
TGME49_239490	_HSVNLHTICTPLTTQVPHAAGAGYAFK_	mitoBirA	4	723.621	-1.6695				1148800000
TGME49_261950	_IMNVIGEPVDECGPVPAKK_	mitoAPEX	3	685.02	-0.6773	0.00058097	70.837	52.942	1148600000
TGME49_208790	_DGFTGLFFR_	mitoAPEX	2	530.267	-0.049474	1.4455e-05	178.94	159.84	1148400000
TGME49_207440	_FEAGNMAMVTGGHNVGR_	mitoAPEX	3	583.272	-0.58455				1148400000
TGME49_247680	_LVFSVVQR_	mitoBirA	2	474.287	0.51582				1148300000
TGME49_249900	_WAVAQTVTAAAGVASYPFDTVR_	mitoAPEX	2	1141.08	0.46986	2.6027e-55	206.43	198.33	1147800000
TGME49_284190	_RFYAPFEATATVK_	BirA control	3	500.933	-0.58376				1147300000
TGME49_234420	_LQWTTNSLIASK_	mitoAPEX	2	681.375	0.14035				1147000000
TGME49_284190	_(gl)QGASLPALGLSQESILSAVQTDPR_	BirA control	2	1211.13	0.21429				1146300000
TGME49_206470	_EACMACYDKPIHMA_	mitoBirA	2	848.851	-1.0428	1.3104e-10	143.94	140.47	1146200000
TGME49_288720	_ESNVATAVTALR_	APEX control	2	616.336	-1.0694	9.6431e-05	109	85.321	1146100000
TGME49_263300	_SKNPEIVNTASVSPAGAFDASSK_	APEX control	3	759.717	-0.76958	4.9243e-07	100.94	91.885	1145900000
TGME49_284190	_PGASLAPVNWM(ox)EIR_	BirA control	2	778.898	0.15752	1.0542e-05	94.688	74.563	1145500000
TGME49_263080	_GKPTAGSCAAGTAVVNPEDPTK_	mitoBirA	3	710.016	-0.15523	2.1821e-07	106.35	103.39	1145500000
TGME49_228470	_YYEVILVDPAHNAIR_	BirA control	3	591.649	0.022954	1.3957e-07	93.478	88.267	1145200000
TGME49_313390	_SSITPGTVLILLSGGHR_	mitoAPEX	3	569.997	-0.076562	8.3638e-06	85.362	77.048	1144500000
TGME49_249900	_AMLFGPNNDANLFYK_	mitoBirA	2	857.917	-1.3294				1144300000
TGME49_288830	_STVVGVDATSVR_	mitoAPEX	2	595.822	0.60412	1.7615e-06	131.17	81.065	1144000000
TGME49_294800	_AGMVLTFAPVGLTTECK_	mitoBirA	3	598.976	-0.52425				1143800000
TGME49_299070	_LTRPILTVCTLESGR_	mitoBirA	3	572.654	-0.29684	2.3803e-11	126.77	117.97	1142900000
TGME49_262960	_LRPCDVCGALLSVFDTDKR_	BirA control	4	556.282	-0.37472	1.1134e-06	102.07	96.104	1142600000
TGME49_313140	_VTLEAAEAIK_	mitoBirA	2	522.8	0.42955				1142000000
TGME49_294800	_EHALLAFTLGVK_	mitoBirA	3	433.587	-0.055331	1.0899e-06	124.42	112.85	1141800000
TGME49_299070	_SFILDSSTQPGDASR_	mitoAPEX	2	790.881	-0.21784	2.3215e-24	186.29	174.23	1141500000
TGME49_298610	_GMSTGTLGAAGALLGAR_	mitoBirA	2	752.401	-0.03301				1140500000
TGME49_243570	_EASVYNTYTLPK_	mitoBirA	2	693.351	-0.33363	0.00017349	77.74	70.13	1140500000
TGME49_261950	_LVLEVAQHLGENTVR_	mitoAPEX	2	839.468	-0.010321	1.7767e-14	145.52	133.81	1139900000
TGME49_226730	_VSLNLSELEPCVAGPK_	mitoBirA	2	856.948	-0.099766	4.8357e-20	167.92	154.82	1139700000
TGME49_314400	_AAVDEVPTGDYELPLSHADIVK_	mitoBirA	3	780.397	-0.33777	1.0508e-06	92.8	82.452	1139100000
TGME49_215460	_VSDSQSIVVFGLK_	mitoAPEX	2	689.882	0.27631				1138700000
TGME49_299070	_GDLGVELPNIAWLPR_	mitoBirA	2	825.454	-0.028143	1.1335e-23	173.44	152.86	1138300000
TGME49_221320	_QPVFIYIPPHGELR_	APEX control	3	555.975	-0.88925	0.0045939	49.988	40.337	1138200000
TGME49_232090	_LTDAEATEFFK_	mitoBirA	2	636.311	0.68276				1137900000
TGME49_306220	_KQSFSEFMSQR_	mitoBirA	2	687.827	-0.64794	0.00025932	116.24	96.031	1137700000
TGME49_267330	_VPPELLTALTK_	mitoAPEX	2	591.361	0.19218				1137700000
TGME49_261950	_FLSQPFTVAEVFTGKPGR_	mitoAPEX	3	661.023	0.16984				1136800000
TGME49_305520	_EYQIIDHFFQPGNCAAPLKDDVMK_	mitoBirA	3	946.119	-0.57716	1.7677e-16	138.57	131.89	1136600000
TGME49_263300	_SKNPEIVNTASVSPAGAFDASSK_	mitoAPEX	3	759.717	0.22416	1.8584e-15	126.27	116.76	1136200000
TGME49_320220	_DMLAAGTTEVDLRPIQEGMTAVFK_	mitoBirA	3	865.105	0.20972	1.6009e-22	141.45	134.72	1135900000
TGME49_276140	_QDLPNAMTAAEVTDK_	mitoBirA	2	802.385	-0.885	2.4827e-12	140.49	117.49	1135900000
TGME49_231600	_LTPFTQSTDILK_	mitoBirA	2	682.377	-1.2621				1135800000
TGME49_202680	_VMEEVPEFK_	mitoBirA	2	554.273	-1.1795				1135200000
TGME49_270510	_ETPVTVCGWSR_	mitoBirA	2	646.309	-0.74951				1135100000
TGME49_219550	_KPASPVVAVQSPGR_	mitoBirA	3	464.937	-0.52794	2.3648e-06	94.059	80.194	1134700000
TGME49_207620	_DPVAVAAVELLEQNLMPSPGELR_	mitoBirA	3	816.765	0.26648	1.8328e-16	138.82	128.88	1134500000
TGME49_218560	_MLNPLPAYR_	BirA control	2	537.792	0.13449	0.0040388	89.698	62.395	1134400000
TGME49_250770	_KLPPDVQVALFSATMPQDILELTTK_	mitoAPEX	3	919.17	1.3049	1.5334e-08	106.67	101.49	1134200000
TGME49_221320	_MFNFLASDGFDESR_	APEX control	2	818.359	-1.1671	5.4359e-10	140.82	130.18	1133900000
TGME49_262670	_STGEILAVNEIR_	mitoAPEX	2	651.357	0.069612	0.0031937	69.03	44.776	1133900000
TGME49_244200	_YIHMGVLANPSHLEAVDPLVIGQAR_	mitoBirA	2	1350.72	0.070319	4.3194e-16	134.69	129.57	1133600000
TGME49_247770	_SYATEHGHFPFAPAR_	mitoAPEX	3	563.271	0.76701				1133100000
TGME49_226730	_VDFDFEEEPLGNDK_	mitoAPEX	2	827.368	0.23411	0.007077	48.405	39.839	1131800000
TGME49_288380	_QNNTLTIEDDGIGMTK_	mitoBirA	2	875.42	0.56814				1131500000
TGME49_308090	_GPASSVPVTYAPR_	mitoBirA	2	651.346	0.38024	7.1086e-06	109.15	86.053	1131100000
TGME49_221320	_NNYANVDLICQIAVQEK_	mitoBirA	2	996.496	-1.0974	4.7919e-51	223.06	213.37	1131000000
TGME49_306650	_AEDVAAHDFPQLLHR_	mitoAPEX	4	430.471	-0.26435	6.0822e-10	117.08	91.551	1129000000
TGME49_232300	_RGPANPLPDTIIVMDPKPEIPVVQPEEMDEGVLGPM_	mitoBirA	3	1294.32	-0.44716	2.8249e-13	88.814	88.277	1128500000
TGME49_221320	_LFLHIVSPLNLASAK_	mitoAPEX	3	541.659	-1.0419	2.8518e-15	148.85	146.01	1128500000
TGME49_270510	_QAIPVFGCGSTR_	BirA control	2	646.824	-0.32737				1127800000
TGME49_313140	_DQTEDKVTLEAAEAIK_	mitoBirA	3	587.635	0.09546	8.7752e-10	111.7	100.6	1127600000
TGME49_246540	_SLFHSHDIPSVR_	mitoAPEX	3	465.577	0.40529	0.00019975	77.185	69.819	1127500000
TGME49_289690	_EPTAIPWGQAGVHYICESTGIFLTK_	BirA control	3	925.799	-0.57727	8.9645e-06	80.664	78.996	1127400000
TGME49_245680	_KGDYVDIVCDPSVQK_	mitoAPEX	3	574.95	-0.39507	5.0672e-06	84.508	76.423	1127300000
TGME49_236210	_LEVIDAEEVKR_	mitoBirA	3	434.242	-1.2007	0.0003006	83.182	29.945	1127000000
TGME49_311720	_NAVVTVPAYFNDAQR_	BirA control	2	832.923	-1.6104	5.5711e-08	107.35	97.217	1126800000
TGME49_284190	_DCDLVSSVFYPAVFDEYQQFLK_	mitoAPEX	2	1335.63	-0.1836	5.2377e-15	132.76	131.06	1126600000
TGME49_306220	_DALAQALQNWEELAPGTTYIAMADK_	mitoBirA	2	1360.67	-0.44352	8.5997e-23	148.1	142.98	1126600000
TGME49_230410	_TAPAEGGIGQLR_	mitoBirA	2	585.317	0.22783	4.8378e-05	117.09	91.749	1124500000
TGME49_263300	_SAELAAEVDCNLLDGR_	BirA control	2	866.912	-1.0094	1.4741e-05	89.502	89.502	1123900000
TGME49_219550	_KSWPELEK_	mitoBirA	2	508.774	-2.3525				1123800000
TGME49_232090	_LDPTALSSFHQR_	mitoBirA	2	686.354	0.20822	0.00080606	79.152	65.343	1123400000
TGME49_252630	_LQQDLAVIDHHVNSTQAADVTKDE_	mitoAPEX	3	883.103	-0.14869	1.3937e-22	143.48	136.38	1123200000
TGME49_270510	_DAAAAAAEPLIPLTK_	BirA control	2	726.409	0.0093159	6.4965e-11	128.06	122.69	1122700000
TGME49_221320	_IRDILSSLPESER_	mitoBirA	3	505.611	-1.1149	3.845e-08	126.09	112.81	1122400000
TGME49_267330	_TVQVPGFENPFLR_	mitoAPEX	2	752.401	-0.09429	6.8792e-11	141.13	96.617	1122400000
TGME49_261950	_TVLIMELINNVANK_	mitoBirA	2	786.445	0.16978	5.0434e-27	208.28	195.1	1121900000
TGME49_235470	_GFQIWTDLAPSVK_	mitoBirA	2	731.39	-0.53015	2.8174e-07	124.42	100.61	1121800000
TGME49_266960	_AILMDLEPGTMDSVR_	mitoBirA	2	824.408	-0.42464	5.8e-07	94.487	82.844	1121800000
TGME49_232340	_NAVLCEALQQSFLDVDEQMK_	mitoBirA	2	1169.56	-0.0062414	2.2826e-82	258.5	245.37	1121600000
TGME49_260180	_KVYLDDETTVEQLK_	mitoBirA	2	840.938	1.236	4.086e-08	135.47	119.1	1121000000
TGME49_288380	_AELVNNLGTIAR_	BirA control	2	635.859	0.084571	4.4214e-05	117.79	83.917	1120900000
TGME49_243490	_GCLSHHLGISTEYCK_	mitoBirA	3	587.94	-0.56969	3.882e-10	120.54	115.84	1120400000
TGME49_268830	_HHFYSQYQPGVVDPEAPQEVEAFK_	mitoBirA	4	701.334	-0.26579	4.2133e-16	131.33	125.1	1120400000
TGME49_313070	_LADPPAGAGASAAAEAPASPSPASSSAEEKPAK_	mitoAPEX	3	987.819	0.15882	2.6877e-11	82.042	75.427	1120300000
TGME49_226730	_SVHVPSGEVLPVYDVAMK_	mitoBirA	3	643.005	0.73191	0.0020934	54.764	51.005	1120100000
TGME49_311720	_NAVVTVPAYFNDAQR_	mitoAPEX	2	832.923	-0.27064	0.00015762	72.315	58.742	1120000000
TGME49_284190	_VVGDFAQFLVQNK_	mitoAPEX	3	488.933	0.035601	1.5038e-06	110.08	101.95	1119800000
TGME49_227948	_LFKPGEPFSGSTAVATR_	mitoAPEX	3	588.981	-0.011596	1.5167e-05	83.758	78.854	1119800000
TGME49_231630	_LVSGVVATQGEAR_	mitoBirA	2	643.857	0.37585	4.8288e-05	90.412	73.39	1119700000
TGME49_221320	_YIHDLASLNTVSQEVVYEDQR_	BirA control	2	1240.11	-0.10899	0.00011104	89.663	79.714	1119600000
TGME49_299070	_EAGKPVVVATQMLESMMQAPLPTR_	mitoBirA	3	862.115	-0.10418	9.437e-23	147.91	142.07	1119000000
TGME49_251780	_AKLEELVGGLLQQSVEPCEK_	mitoAPEX	2	1114.09	-0.1413				1118800000
TGME49_221320	_IQLVLSLLR_	mitoAPEX	2	527.853	-1.3421	0.0027788	98.044	23.124	1118400000
TGME49_244200	_SVVWAQEEPMNQGAWFYTSK_	mitoBirA	3	786.7	-0.43845	9.299e-31	169.51	161.1	1118200000
TGME49_299070	_VTEVFADTTALSR_	mitoBirA	2	705.367	0.030971	3.5066e-18	187.11	142.57	1118000000
TGME49_232090	_EAETGVEADGPAPPASAASPGFSAFASDVAAAPECLR_	mitoBirA	3	1191.89	0.084017	3.7371e-23	119.3	117.45	1117800000
TGME49_247510	_VPLMIGTAR_	mitoBirA	2	479.281	0.2761	0.0029953	93.598	57.041	1117300000
TGME49_314400	_GLLLSSIR_	mitoAPEX	2	429.774	0.0012678	0.009789	139.68	22.795	1117200000
TGME49_299070	_GDLGVELPNIAWLPR_	mitoBirA	2	825.454	-0.79179				1116900000
TGME49_263300	_LPTIHSFFSVNPLASSFNFGNVVEYK_	BirA control	3	972.164	-0.24051	8.6728e-13	114.21	111.09	1116400000
TGME49_289690	_EPTAIPWGQAGVHYICESTGIFLTK_	APEX control	3	925.799	-1.1738	2.9849e-06	88.573	85.016	1116200000
TGME49_320050	_NKIEADDIEAMYK_	mitoBirA	3	513.917	-0.30756	2.2912e-11	141.13	127.12	1116100000
TGME49_299070	_VTEVFADTTALSR_	mitoBirA	2	705.367	-0.45738	0.0016937	67.838	46.872	1115500000
TGME49_209030	_DLTEYMMK_	mitoBirA	1	1030.46	-1.3734				1115200000
TGME49_246540	_SLFHSHDIPSVR_	mitoBirA	3	465.577	0.28355	0.00017016	80.312	68.393	1115100000
TGME49_226730	_TNLVGMGILPLQFQEGQNAESLGLTGK_	mitoBirA	3	939.16	-0.16053	1.7127e-56	201.35	192.2	1114800000
TGME49_244560	_LASGFEVEDPKDVAASLYK_	mitoBirA	3	680.349	0.0057173	3.0566e-06	93.92	83.092	1114300000
TGME49_221320	_DMFEEILK_	mitoBirA	1	1024.5	-0.52155				1114200000
TGME49_268890	_VLDAVPPSTHPMTQLVMAAAALQPTSELAQAYR_	mitoAPEX	4	870.202	0.16402	2.1192e-08	72.573	69.257	1113100000
TGME49_221320	_VDAVWPGWGHASENPNLPR_	mitoAPEX	2	1051.51	0.11915	6.9093e-32	173.98	165.13	1113000000
TGME49_206480	_VDPDTGAVATEACASFLK_	mitoAPEX	2	926.443	-0.0095753				1112800000
TGME49_263300	_LPTIHSFFSVNPLASSFNFGNVVEYK_	mitoAPEX	3	972.164	-0.41012	2.039e-69	211.71	206.25	1112000000
TGME49_254030	_PLCNGTHLWVK_	mitoBirA	3	442.233	-1.5777				1110700000
TGME49_203630	_GFGGQTKPIFR_	BirA control	3	403.224	0.093007	0.0024937	66.056	48.236	1110400000
TGME49_221320	_IRDILSSLPESER_	mitoBirA	3	505.611	0.28488	1.2127e-06	116.9	94.34	1110000000
TGME49_215460	_VSDSQSIVVFGLK_	BirA control	2	689.882	0.31348	7.5966e-18	184.21	159.71	1108400000
TGME49_232710	_APTLFNVR_	mitoBirA	2	459.264	0.44832				1108300000
TGME49_284190	_(gl)QGASLPALGLSQESILSAVQTDPR_	mitoBirA	3	807.759	0.31887	5.7125e-11	117.61	113.41	1107500000
TGME49_236210	_EHILEYINR_	mitoAPEX	3	396.212	-0.088288	0.00024369	133.86	101.45	1107500000
TGME49_284190	_RFYAPFEATATVK_	mitoBirA	2	750.896	0.10349				1107400000
TGME49_214250	_(gl)QALTFGIWQKPNIGTHGPDPADAK_	mitoBirA	3	849.099	0.55365				1106700000
TGME49_249250	_VNQYPSCSLLQLEGVNDR_	mitoBirA	2	1046.51	-0.14877				1106600000
TGME49_221320	_DIFDQATVK_	mitoBirA	1	1036.53	0.1655				1105600000
TGME49_263300	_YAVGASYTGVASK_	mitoAPEX	2	637.325	0.126	2.8479e-05	92.039	81.85	1105300000
TGME49_263700	_AATGEEGEAQGSGLGPATR_	BirA control	2	879.916	-0.6608	4.8551e-20	143.57	133.65	1105200000
TGME49_221320	_RLIFENEVK_	mitoBirA	2	574.327	-0.13256				1104900000
TGME49_226730	_VDLIEAYTK_	mitoBirA	2	526.287	-0.48504	0.0028617	96.342	47.548	1104100000
TGME49_306220	_DALAQALQNWEELAPGTTYIAMADK_	mitoBirA	2	1360.67	-0.50719	7.3339e-23	149.44	142.89	1103600000
TGME49_230410	_IAPDFTADAVMPNGEIQK_	mitoAPEX	2	958.975	-0.99525	2.5649e-06	101.28	93.414	1102100000
TGME49_261950	_TREGNDLYHEMMTTGVIK_	mitoBirA	3	699.003	-0.8372	3.6819e-05	88.565	77.526	1101900000
TGME49_210690	_GSIVGPDLAVLNLVLVK_	mitoBirA	2	854.024	0.22765	1.027e-05	90.561	86.443	1101800000
TGME49_226970	_DVGLGFQTPR_	BirA control	2	545.288	-0.72307	0.00038238	99.568	74.792	1101800000
TGME49_215590	_IFAGVNAEKEPIPVLPTVHYNMGGIPTNWR_	mitoBirA	4	830.937	-1.1463	2.2764e-10	79.917	74.138	1101600000
TGME49_292920	_TFTLQDTGVGMTK_	mitoBirA	2	699.85	-0.18344	3.2147e-11	149.69	136.37	1101500000
TGME49_262640	_LNQISYDHNYDWER_	mitoAPEX	3	618.28	0.31269	1.6648e-06	100.11	96.048	1101400000
TGME49_245460	_LLGVVYNASNNELVR_	APEX control	2	830.954	-1.0353	3.2012e-11	134.61	114.94	1101000000
TGME49_319920	_YNCRPTITAFLIK_	mitoBirA	3	532.957	-0.36612	1.4172e-11	147.26	131.32	1100900000
TGME49_254030	_VYWWCSCGLSK_	mitoAPEX	2	723.321	-0.711	0.00042154	93.345	88.988	1099900000
TGME49_202630	_LAPTIDAVALSER_	mitoBirA	2	678.38	0.23169	5.795e-06	112.08	87.388	1098900000
TGME49_235470	_ELIFTSNAEVIK_	mitoBirA	2	682.377	0.22653	0.0003997	88.803	33.719	1098800000
TGME49_290600	_LIGPNCPGIIKPGECK_	mitoAPEX	3	584.976	0.30034	0.0056976	47.548	33.464	1098600000
TGME49_312160	_PRPTQYQTEICNQATNVQPGVEKDPTK_	mitoBirA	3	1033.84	0.19398	1.1889e-12	117.03	114.82	1098200000
TGME49_209030	_DLTEYMMK_	BirA control	2	515.733	-0.87656				1096500000
TGME49_221320	_DILSSLPESERR_	BirA control	3	467.916	-0.67603	8.6199e-05	89.301	49.516	1096500000
TGME49_292920	_FSSFVNFPIYVK_	mitoAPEX	2	724.385	0.12063				1096400000
TGME49_251780	_QEITIQSSGGLSDSQIEQMVK_	mitoAPEX	3	760.046	0.17497	2.6725e-63	229.41	215.99	1096300000
TGME49_207170	_LEGSLLPPPHIPGIR_	mitoBirA	3	532.647	0.13071	3.5811e-08	104.81	93.355	1096200000
TGME49_244200	_HLVRPDVPAAPQLTGVPLDR_	mitoAPEX	4	538.556	0.11386	0.003966	48.053	41.618	1096000000
TGME49_235470	_NQIYTTADPLVVAINPFR_	mitoBirA	2	1016.55	0.4687	2.0312e-51	227	215.57	1095800000
TGME49_251780	_VQTEVNLPFITADQTGPK_	mitoBirA	3	653.346	0.70327	3.4675e-20	143.43	123.99	1095500000
TGME49_320220	_HLDQEVTDVSQLVEPVSSPHQTEGWFK_	mitoBirA	3	1031.5	-0.79973	2.8554e-44	182.41	171.6	1095500000
TGME49_284190	_QIGFPVMLK_	APEX control	2	516.799	-0.50136				1095400000
TGME49_299070	_GDLGVELPNIAWLPR_	mitoBirA	2	825.454	-0.95038	6.4159e-11	128.22	118.15	1095400000
TGME49_284190	_(gl)QGASLPALGLSQESILSAVQTDPR_	mitoAPEX	3	807.759	-0.28193	1.0078e-22	143.36	130.23	1095200000
TGME49_316330	_NSSGAIFNNAAQAWNHEFYFK_	mitoAPEX	3	806.042	-0.17396	1.1001e-39	180.8	176.05	1095000000
TGME49_284190	_TAAIPPPLPSSVER_	mitoBirA	2	717.901	0.20452	0.0011274	67.019	50.755	1094700000
TGME49_244560	_APEMQIFLK_	BirA control	2	538.794	-0.97724	0.0022105	109.66	85.574	1094500000
TGME49_230410	_HLTVNDLPLGR_	mitoAPEX	2	617.849	-2.0543	0.0013208	83.182	59.506	1094400000
TGME49_202630	_TGLSAESFIEK_	mitoBirA	2	591.306	0.19954				1093900000
TGME49_313140	_GADKVTASDYLTTEEFMDAISDTLK_	mitoBirA	3	907.765	-1.354	0.006207	43.414	41.794	1093500000
TGME49_228470	_INWLCKPVMK_	mitoBirA	2	644.849	-0.021247				1092800000
TGME49_309820	_VLEQLTGQRPQFSK_	BirA control	2	815.949	-0.11127	2.5241e-11	154.65	128.92	1091600000
TGME49_320220	_HLDQEVTDVSQLVEPVSSPHQTEGWFK_	mitoBirA	3	1031.5	-0.28396	7.3803e-34	164.48	152.7	1091300000
TGME49_311720	_NEATINPTNTLFDVK_	mitoAPEX	2	838.928	0.31267	9.7796e-15	150.76	142.2	1091200000
TGME49_249250	_VNQYPSCSLLQLEGVNDR_	BirA control	2	1046.51	-0.28206	1.3534e-37	194.92	178.61	1090300000
TGME49_210690	_GSIVGPDLAVLNLVLVK_	mitoBirA	2	854.024	0.4511	1.932e-10	116.78	112.72	1090200000
TGME49_299070	_GDLGVELPNIAWLPR_	mitoAPEX	2	825.454	0.12638	0.00052823	67.648	59.865	1090100000
TGME49_239490	_DQYAGDGIAIR_	mitoAPEX	2	589.794	0.13516	0.0041509	72.187	42.42	1089700000
TGME49_284190	_(gl)QGASLPALGLSQESILSAVQTDPR_	BirA control	2	1211.13	0.25902	4.102e-12	124.51	117.26	1087200000
TGME49_284190	_STWQRPVRPIR_	BirA control	3	465.937	-0.49438				1086500000
TGME49_284190	_RFYAPFEATATVK_	mitoBirA	3	500.933	-0.28318	4.3224e-06	97.69	86.107	1086100000
TGME49_313140	_DIFQSYYDEQFKPLFEK_	mitoBirA	2	1099.03	-1.0676	3.9891e-24	165.3	155.36	1085800000
TGME49_249390	_QLVGGPDGDLGSNALLK_	mitoBirA	2	827.444	0.096581				1085200000
TGME49_209030	_AVFPSIVGK_	mitoBirA	2	459.276	-0.81373				1084900000
TGME49_214250	_QALTFGIWQKPNIGTHGPDPADAKK_	mitoBirA	5	538.887	-0.90072	1.7463e-05	74.819	68.683	1084800000
TGME49_226730	_FVEFYGPGVQTLTLADR_	mitoAPEX	2	956.994	3.1857	1.6883e-19	148.44	132.6	1083700000
TGME49_204020	_NAALTIGNILPLNK_	BirA control	2	726.433	0.088907	4.3487e-06	106.32	73.058	1083600000
TGME49_221320	_NVCLFALTTPMDFGTEEEK_	APEX control	3	734.675	-0.8355	1.1505e-06	100.39	90.919	1083400000
TGME49_206470	_YDVVVVGGGPGGYVAAIK_	mitoBirA	2	860.967	0.40176	0.0003465	80.049	74.334	1083300000
TGME49_297810	_ITFVSHPGVMAVSK_	mitoAPEX	3	491.603	-0.15724	0.006714	44.925	33.343	1083300000
TGME49_232340	_TLEELAQSGSR_	mitoBirA	2	595.804	0.11562	0.0003858	95.618	53.282	1083100000
TGME49_231410	_ITKPWTTDTTFDDIILSQPSKEDFAK_	mitoBirA	4	750.133	0.23136	1.4783e-12	109.98	105.58	1083000000
TGME49_320050	_NKIEADDIEAMYK_	BirA control	2	770.372	-0.038738	0.0041842	72.891	61.632	1082800000
TGME49_251780	_GVNPDEAVAMGAAIQAGVLK_	mitoBirA	3	637.672	0.062041	4.6579e-10	115.57	103.67	1082700000
TGME49_297720	_ITFVPGGENLFAQGRPPSPQVK_	mitoBirA	3	780.422	1.2181	1.3209e-06	95.195	85.049	1082500000
TGME49_284190	_FIDEHNELLFYDPLDMSSQNICK_	mitoBirA	3	943.435	-0.48613	2.112e-31	167.02	161.32	1082200000
TGME49_244560	_FTALSHPEVLEPK_	BirA control	3	489.933	0.058188				1081400000
TGME49_237010	_VEEVIHALDLEK_	mitoAPEX	3	465.589	0.18335	3.1652e-07	133.32	95.353	1081000000
TGME49_226730	_EPAPIEDIVDAYCLLNLGDSITTDHISPAGNIAVNSPAAK_	mitoBirA	3	1388.03	-0.3681	1.7238e-21	97.941	94.656	1080900000
TGME49_236210	_NDDMGPTAHVAVGFEGVPWK_	mitoBirA	2	1064	-0.73398	1.6661e-14	131.77	119.39	1080700000
TGME49_239490	_VDGNDLFASLLATK_	mitoBirA	2	732.391	-0.36497	1.9892e-05	91.076	82.187	1080400000
TGME49_262380	_VSCTVELLHPTALHEGLR_	mitoBirA	4	508.772	0.029524	5.7757e-05	82.01	79.905	1079900000
TGME49_245680	_TGIVFNVTQR_	APEX control	2	567.817	-0.15878	0.0012533	88.596	58.032	1079900000
TGME49_237010	_LIQLISPHVDDCDAR_	mitoAPEX	3	584.63	-0.246	1.6589e-06	89.911	70.157	1079400000
TGME49_250770	_VVLALGDYLQVR_	BirA control	2	673.396	0.36763	0.00047937	86.911	61.49	1079100000
TGME49_221320	_IVDFSGLLDLPR_	APEX control	2	672.88	-0.017797	0.00081397	78.964	37.28	1078900000
TGME49_217890	_PAPMVSQPAPAFEAEAVMADGSFGK_	mitoBirA	3	835.731	-0.27432	8.7164e-18	140.41	138.05	1078800000
TGME49_262960	_VDPAAIAAIAR_	mitoAPEX	2	534.314	0.1532				1078400000
TGME49_202680	_SHMPLLVPMLTGNVLFPR_	mitoBirA	3	674.706	-0.30438	1.7127e-20	150.39	145.86	1078100000
TGME49_319920	_LADIGEGIAQVELLK_	mitoAPEX	2	784.948	0.12065	9.9621e-14	140.96	112.15	1077700000
TGME49_289690	_SSDVIVSNASCTTNCLAPLAK_	BirA control	2	1104.54	-0.28573	8.8443e-11	124.2	113.44	1077700000
TGME49_261950	_TREGNDLYHEMMTTGVIK_	mitoBirA	4	524.504	-0.34165	1.752e-10	118.72	111.6	1077500000
TGME49_209030	_DLTEYMMK_	mitoBirA	1	1030.46	-0.59358				1076600000
TGME49_300000	_AGGECLTFDQLALR_	mitoAPEX	2	775.885	0.82948	4.5292e-08	127.71	120.01	1075700000
TGME49_227600	_ALPGIPAVAPHR_	mitoBirA	3	400.24	-0.98769	0.00058109	70.942	55.327	1075500000
TGME49_247550	_GFNAQTGEYVDMMAAGIIDPTK_	mitoAPEX	2	1165.05	-1.3971				1075200000
TGME49_288750	_WNLAVMAK_	mitoBirA	2	466.755	0.64869				1075100000
TGME49_292920	_AYLWSSDGAGEFNVK_	mitoAPEX	2	822.389	-0.42699	5.9003e-09	109.83	101.49	1074700000
TGME49_207620	_NVTVIGQETVPFER_	mitoAPEX	2	794.92	-0.02911	6.9911e-05	77.42	61.197	1074400000
TGME49_221320	_AHVVLAAVLFR_	mitoAPEX	2	598.369	-0.50343				1073700000
TGME49_311720	_VLAPEEVSAMVLTK_	mitoBirA	2	743.913	0.094129	8.4149e-05	81.632	69.363	1073500000
TGME49_254030	_PLCNGTHLWVK_	mitoBirA	3	442.233	-0.48019	7.2085e-05	99.752	78.356	1073200000
TGME49_232300	_FKDGYLISTGEPSK_	mitoAPEX	3	514.6	0.26488				1072900000
TGME49_250770	_DFTVSSMHGDMDQK_	BirA control	3	533.226	-0.16581	1.0787e-05	86.944	0	1072900000
TGME49_247770	_SYATEHGHFPFAPAR_	mitoAPEX	4	422.705	0.091081	3.1517e-06	86.803	77.521	1072300000
TGME49_247550	_VLAHLNSVTK_	mitoAPEX	3	361.217	-0.58143	0.0037981	62.166	43.39	1071900000
TGME49_288500	_SDSACAIFIPDEHSAVNYYHLAASFVDQAK_	mitoAPEX	4	832.391	-0.22704	1.0047e-13	105.9	102.12	1071700000
TGME49_284560	_ATNVKDEIALTGTDVELVSR_	mitoAPEX	3	711.046	0.11905	3.0303e-47	192.62	183.76	1070900000
TGME49_214750	_AWLYESALK_	mitoAPEX	2	540.79	-0.058887				1070500000
TGME49_261570	_LVVIAHDVTPVELVCFIPQLCR_	BirA control	3	860.134	-0.59453	8.2281e-31	160.55	157.58	1070200000
TGME49_245620	_CGLTYILNAEE_	mitoBirA	2	641.803	-0.029	2.5326e-08	173.64	152.27	1070100000
TGME49_249390	_DIQCLDSPDAPPILLK_	mitoBirA	2	897.969	0.22124	2.0124e-11	132.64	118.9	1068800000
TGME49_247510	_VSPLGSPPELR_	BirA control	2	576.325	-0.06273	0.00088846	87.667	58.134	1068700000
TGME49_273760	_SINPDEAVAYGAAVQAAILK_	mitoBirA	3	667.693	-1.2104	6.2891e-15	125.51	118.56	1068400000
TGME49_249900	_YFPTQAFNFAFK_	mitoAPEX	2	740.867	-1.1246	0.00016593	101.39	93.61	1068300000
TGME49_221320	_RLSELGITFIGPSATVMAALGDK_	mitoAPEX	3	783.095	0.21657	2.4823e-06	100.62	94.472	1068200000
TGME49_288500	_YNMSSIGDFLR_	mitoBirA	2	651.811	-0.046812	0.00042154	93.345	58.591	1068100000
TGME49_294800	_EHALLAFTLGVK_	mitoAPEX	3	433.587	0.26243	3.3823e-08	141.08	129.52	1067700000
TGME49_215350	_DPSAAFMK_	mitoAPEX	2	433.707	-0.092384				1066800000
TGME49_232340	_TLEELAQSGSR_	mitoBirA	2	595.804	-0.45002	0.0010046	86.463	42.693	1066400000
TGME49_287500	_LLAESSGHSGTEALAALHAAHGQGR_	mitoBirA	4	611.062	-1.3383				1066100000
TGME49_235470	_NQIYTTADPLVVAINPFR_	mitoBirA	2	1016.55	0.66898	6.8871e-84	275.74	261.17	1065500000
TGME49_311720	_VTEAQEWLNTNPDADAEETRDK_	mitoBirA	3	844.721	-0.11479	1.7952e-73	251.13	243.71	1065200000
TGME49_268830	_DVERPTQAVQTLLGHLEATGR_	mitoBirA	4	573.558	-1.0313	1.9614e-10	119.27	110.99	1065100000
TGME49_214750	_VLTSMMGTVER_	mitoAPEX	2	612.31	-1.0499				1064900000
TGME49_276140	_QDLPNAMTAAEVTDK_	mitoBirA	2	802.385	-0.77341	3.6257e-08	107.82	90.279	1064600000
TGME49_284190	_AAIPGGAGSIAGAPEDLDLR_	mitoAPEX	3	617.658	0.51376	0.0010692	64.5	49.736	1063700000
TGME49_243490	_GCLSHHLGISTEYCK_	mitoBirA	3	587.94	-0.5102	8.2477e-10	115.56	107.22	1062900000
TGME49_249900	_KKGEQEIQYTGTADCWK_	mitoBirA	3	681.326	-0.31782	2.3441e-05	85.362	83.954	1062700000
TGME49_227948	_SGEPVFQNLLQK_	mitoBirA	2	680.367	0.51353	0.00010099	108.35	84.88	1062600000
TGME49_270510	_SFTPGHLEDQVPTSCK_	mitoBirA	2	901.923	-0.075281	8.9273e-15	144.97	135.4	1061900000
TGME49_201680	_SETAAQMLEEIKK_	mitoBirA	3	493.257	-0.30423	5.4142e-08	124.51	88.194	1061800000
TGME49_249900	_VSAEQGVASLWR_	APEX control	2	651.844	-0.90397	7.4918e-13	186.76	142.87	1061800000
TGME49_221510	_WTWDHTYSEAYEDKPSAEASPK_	mitoBirA	4	650.291	0.019205	1.7534e-10	116.35	112.15	1061700000
TGME49_284190	_TAAIPPPLPSSVER_	mitoAPEX	2	717.901	-0.22816	1.0081e-05	94.688	69.158	1061500000
TGME49_215280	_NCLACLTPIK_	mitoAPEX	2	595.307	-0.23816				1061200000
TGME49_262690	_YTVSSDMDVK_	mitoAPEX	2	572.763	0.85067	0.0027692	81.017	71.695	1061000000
TGME49_221320	_KIVDFSGLLDLPR_	BirA control	3	491.621	-1.0399	2.6255e-08	126.1	102.98	1060800000
TGME49_299070	_SGEPLDLPVFTSTK_	mitoBirA	2	745.89	0.2726	5.9184e-06	103.14	88.506	1060600000
TGME49_221320	_(gl)QPVFIYIPPHGELR_	BirA control	2	824.946	0.22025	4.2284e-05	81.185	68.014	1060200000
TGME49_251780	_SYSPSQISAFILTK_	mitoAPEX	2	771.414	0.47419	2.38e-06	112.96	99.375	1059100000
TGME49_228470	_YYEVILVDPAHNAIR_	mitoAPEX	3	591.649	0.27863				1059100000
TGME49_311720	_GVPQIEVTFDVDR_	BirA control	2	737.88	0.2853	0.0022326	64.798	55.36	1058600000
TGME49_284190	_LDGAIGASGAVVQPYYDSLLVK_	mitoBirA	2	1118.6	0.3339	3.9122e-30	159.67	152.4	1058200000
TGME49_250770	_LPPDVQVALFSATMPQDILELTTK_	BirA control	3	876.472	-0.77205	1.714e-16	137.52	127.37	1057600000
TGME49_227948	_AVRDPDVLLQEGWR_	mitoBirA	3	551.962	0.94159	1.8687e-06	103.76	90.661	1057500000
TGME49_221320	_IQLVLSLLR_	mitoBirA	2	527.853	0.071071				1057100000
TGME49_214750	_LANDPEVLLHAR_	mitoAPEX	3	449.917	0.10091	0.00017009	80.318	61.187	1056800000
TGME49_284190	_AEELSFPSSVVEFLQGR_	mitoAPEX	3	632.323	0.0085267	3.5688e-11	118.2	109.86	1056400000
TGME49_262380	_VSCTVELLHPTALHEGLR_	mitoBirA	4	508.772	-0.16666	1.8554e-07	105.9	100.37	1056100000
TGME49_320140	_(ac)SYPYYCEFFVK_	mitoBirA	2	772.842	-0.037509	0.0037718	71.085	66.18	1056000000
TGME49_284190	_FVSYQNAGTVEFLVEGDR_	BirA control	3	677.665	0.17679	3.1313e-21	155.94	143.76	1055900000
TGME49_221320	_VTAENPDEGFKPTSGR_	mitoBirA	3	568.944	-0.93307				1055600000
TGME49_288830	_DVAANAFFLK_	mitoAPEX	2	548.295	0.20308	0.0015929	86.898	69.386	1055600000
TGME49_226730	_NCDGFSIKPEDVQTILDWQK_	mitoBirA	3	798.386	-0.63253	1.001e-10	123.43	119.91	1055400000
TGME49_221320	_MFNFLASDGFDESR_	mitoBirA	2	818.359	-0.10612	1.0308e-11	151.74	136.57	1055000000
TGME49_268830	_LRDGAQEVQTVIER_	mitoBirA	2	807.434	-0.31815	5.7195e-08	137.79	111.43	1054900000
TGME49_268890	_GLTAILTETSTLHAEK_	mitoBirA	3	562.309	0.20689	1.903e-20	163.8	147.96	1054600000
TGME49_268830	_DVERPTQAVQTLLGHLEATGR_	mitoBirA	4	573.558	-0.15372	6.4437e-07	102.45	92.537	1054600000
TGME49_290600	_IAALEDAGVHVVR_	mitoAPEX	2	675.38	0.087611	5.4055e-11	144.57	107.39	1053800000
TGME49_245460	_KFELGRPPAMTK_	BirA control	3	458.924	-0.22613				1053600000
TGME49_297810	_GQYTVPSYVADYSPIEIPR_	mitoBirA	2	1078.04	2.9538				1053200000
TGME49_221320	_NVCLFALTTPMDFGTEEEK_	BirA control	3	734.675	-1.1825	0.0043288	47.726	40.49	1053100000
TGME49_232340	_QVCEDLCDECLAEDPLQSEGHGCDNMTCLIVELSSCLK_	mitoBirA	3	1495.63	-0.73748	1.9755e-20	106.36	106.34	1052400000
TGME49_261950	_TVLIMELINNVANK_	mitoAPEX	3	524.632	-0.20765				1052100000
TGME49_249900	_DFLAGGISAGVSK_	mitoBirA	2	611.327	0.67641	0.0020274	65.956	44.386	1051300000
TGME49_221320	_IRDILSSLPESERR_	mitoBirA	3	557.644	-0.24968				1051100000
TGME49_221510	_WTWDHTYSEAYEDKPSAEASPK_	mitoBirA	4	650.291	-0.055945	1.115e-10	119.41	116.66	1051000000
TGME49_226730	_ASDLFDWDEK_	mitoAPEX	2	613.272	0.32593	0.00020168	121.61	104.83	1050600000
TGME49_218560	_FVCGLNALEVACK_	BirA control	2	740.868	0.04298	1.4028e-05	102.33	85.309	1050300000
TGME49_221320	_LDALDPNTQAYLALPR_	mitoAPEX	3	590.984	0.039554	1.5902e-15	147.51	137.36	1050100000
TGME49_273930	_MINADSTLRPLFQK_	mitoAPEX	3	545.296	-0.22452	3.806e-05	77.204	60.732	1050100000
TGME49_268830	_(gl)QSTPGKPQQIDWAK_	mitoBirA	2	783.899	-1.177	0.00034888	70.26	61.945	1049900000
TGME49_292130	_DQVAFLQQYGHA_	BirA control	2	688.833	0.35232	0.00011252	107.11	86.73	1049800000
TGME49_306220	_AGLELDSPSLTFEEFYSALCTCEGMK_	mitoBirA	3	985.775	-1.1122	8.8621e-44	174.7	163.42	1049700000
TGME49_231410	_VGFETIHENSIKPVAPLSENSK_	mitoBirA	4	599.817	-1.016	7.4654e-07	97.5	87.353	1049600000
TGME49_239490	_HSVNLHTICTPLTTQVPHAAGAGYAFK_	mitoAPEX	4	723.621	0.01048	1.0049e-25	153.87	149.27	1049500000
TGME49_284190	_(gl)QIGFPVMLK_	mitoAPEX	1	1015.56	0.08039				1049200000
TGME49_263530	_TGEFIPPCVQVGQTVVVPEYGGMK_	mitoBirA	2	1296.65	-0.32907	1.3397e-06	96.723	91.091	1049000000
TGME49_221320	_LFLHIVSPLNLASAK_	BirA control	2	811.985	0.060559	5.1893e-06	90.707	87.392	1048600000
TGME49_231910	_GLCGGVNSFVAK_	mitoBirA	2	604.808	-1.1645	0.00068952	81.92	57.067	1048400000
TGME49_249390	_ALPDVLVPGLMSIETLR_	mitoAPEX	2	912.519	-0.60248	0.0060283	55.437	47.926	1048200000
TGME49_259710	_LFQEMDVNK_	mitoAPEX	2	562.276	-0.092987	0.0047399	87.806	50.742	1048200000
TGME49_247550	_TALSDAASVASLMTTTEAAVVEAK_	mitoBirA	3	779.733	-0.51381	0.00045741	65.881	63.313	1048000000
TGME49_221320	_LSELGITFIGPSATVMAALGDK_	BirA control	2	1096.09	-1.2352	4.5941e-30	157.28	145.92	1048000000
TGME49_299070	_AEVSDVANAVYDGADAVMLSGETAAGNAPAR_	mitoBirA	3	998.137	-0.41724	3.3333e-75	221.5	216.7	1048000000
TGME49_290030	_VSTPGTLEVHTSPALQQQPHFHEEAAGHH_	mitoBirA	6	524.591	-0.34586	0.00017985	48.138	44.674	1047900000
TGME49_320050	_NKIEADDIEAMYK_	BirA control	3	513.917	-0.12032	2.3234e-06	109.44	95.433	1047700000
TGME49_312160	_PRPTQYQTEICNQATNVQPGVEK_	mitoBirA	3	886.77	-0.48157	1.0655e-53	202.17	192.42	1047400000
TGME49_230410	_KFHSLLNNSVALR_	mitoBirA	2	749.928	0.14783	0.0011222	74.475	57.359	1047100000
TGME49_284190	_GTNAVGYTACPDNSVEAFCR_	APEX control	2	1094.97	-0.67845	2.7224e-55	220.36	216.48	1046700000
TGME49_292920	_FQTSETPAGELISLDK_	mitoAPEX	2	868.441	0.27886	8.9273e-15	144.97	144.97	1046200000
TGME49_311720	_AKFEELNSDLFQK_	BirA control	3	523.603	0.022066	7.2181e-06	95.183	84.237	1046100000
TGME49_221320	_IDTSWLDK_	mitoAPEX	1	977.494	0.25791				1045000000
TGME49_209030	_TTGIVLDSGDGVSHTVPIYEGYALPHAIMR_	BirA control	4	793.155	0.0394				1044700000
TGME49_221320	_IRDILSSLPESERR_	BirA control	4	418.485	-0.63272	2.3382e-06	97.797	85.005	1044400000
TGME49_232230	_VSCLAVTDPGDSDIIR_	BirA control	2	859.425	0.026815	2.9249e-07	102.64	91.522	1044100000
TGME49_288830	_AGAAEPTPQWLGR_	mitoAPEX	2	677.349	0.11056	1.282e-05	103.46	92.913	1043900000
TGME49_215460	_VSDSQSIVVFGLK_	mitoBirA	2	689.882	0.71319	0.0016591	68.033	55.679	1043500000
TGME49_297810	_ITFVSHPGVMAVSK_	mitoBirA	2	736.9	0.31776	1.289e-08	137.21	123.62	1043000000
TGME49_236040	_SPSGVPMVDLLK_	mitoBirA	2	621.842	-0.3587	1.6905e-05	122.39	122.39	1042700000
TGME49_268890	_STTLDLLK_	mitoBirA	2	445.763	0.22955				1042500000
TGME49_312090	_VTLGLPVGALINCCDNSGAK_	BirA control	2	1030.02	-0.51496	1.6586e-29	157.85	151.25	1042400000
TGME49_284190	_AEELSFPSSVVEFLQGR_	mitoAPEX	3	632.323	0.048747	5.1003e-11	115.38	108.77	1042200000
TGME49_232230	_LIIISNNCPALR_	APEX control	2	692.392	-1.1746	2.1487e-08	155	127.67	1042200000
TGME49_221320	_LSELGITFIGPSATVMAALGDK_	BirA control	2	1096.09	-0.70657	1.2002e-09	111.66	103.83	1041200000
TGME49_294800	_VPFVAISGFVGDNMVEK_	mitoAPEX	3	603.647	-0.24882	4.9289e-06	88.311	82.627	1040900000
TGME49_284190	_(gl)QVFDESYLVGR_	APEX control	2	648.317	-0.90621				1040300000
TGME49_221320	_IGLYENLKDK_	mitoAPEX	3	398.224	-0.13332	0.0028775	70.942	50.738	1040100000
TGME49_294800	_GCATFLAQVIVLNHPGEIK_	mitoAPEX	3	689.707	-0.078924	2.9026e-16	140.28	134.89	1040100000
TGME49_259710	_DGVVDLADFK_	mitoAPEX	2	539.774	0.069732	0.0027692	81.017	60.73	1040000000
TGME49_284190	_DCDLVSSVFYPAVFDEYQQFLK_	APEX control	2	1335.63	-0.54426	6.3017e-23	156.51	152.41	1039600000
TGME49_298610	_GMSTGTLGAAGALLGAR_	mitoBirA	2	752.401	0.3257	2.8449e-19	142.45	123.35	1039600000
TGME49_221320	_GFPIDALHTELFEVETQDGSK_	mitoBirA	3	778.381	-0.99912	3.2495e-15	129.02	121.35	1039500000
TGME49_221320	_AHVVLAAVLFR_	BirA control	2	598.369	-0.25546				1039200000
TGME49_288750	_DHGLMYDDLYSDKEPVFAR_	mitoBirA	4	568.515	-0.19126	4.9995e-15	129.11	122.97	1039200000
TGME49_214250	_(gl)QALTFGIWQKPNIGTHGPDPADAK_	mitoBirA	3	849.099	-0.70363	7.8893e-16	127.41	111.61	1039100000
TGME49_311720	_DKDLLPYEIINK_	mitoBirA	3	487.605	-0.96319	1.9112e-05	115.57	101.99	1038500000
TGME49_254620	_QNRPIPPWIR_	mitoBirA	3	426.247	-0.20757	0.0055067	62.558	42.375	1038400000
TGME49_297810	_STAEVPDVLVTFGTQTEK_	mitoAPEX	2	961.491	1.3289	1.7853e-14	124.84	110.86	1038000000
TGME49_284540	_LGEQVLDFSVATR_	mitoAPEX	2	717.883	-0.76001	0.0064983	51.771	45.084	1037900000
TGME49_227948	_LFKPGEPFSGSTAVATR_	mitoBirA	3	588.981	0.42404	7.2795e-08	105.02	96.455	1037500000
TGME49_226730	_ATVANMAPEYGATMGFFPVDEQTLR_	mitoBirA	3	906.096	-0.26755	1.6004e-12	124.09	118.77	1037100000
TGME49_288380	_APFDLFETR_	mitoBirA	2	548.277	-0.043777	0.0028893	95.775	78.937	1036900000
TGME49_292920	_SDATSATTNDGVADSEGEVHTFK_	mitoAPEX	3	780.347	-0.48585	8.0733e-11	118.51	115.54	1036700000
TGME49_311720	_SQVDEIVLVGGSTR_	BirA control	2	730.391	0.0069366				1036600000
TGME49_215280	_NCLACLTPIK_	mitoBirA	2	595.307	-0.044238	0.0014589	87.568	67.537	1036600000
TGME49_236210	_MVVAAAGDVDHK_	mitoBirA	2	606.806	-0.051715	0.0007798	72.29	58.481	1036200000
TGME49_219550	_FEANAGDTVEVGKPLYVIDPTAQPDPAELAAAAAAAAAPATPVK_	mitoBirA	5	858.645	0.23282	0.00084879	37.134	36.054	1035900000
TGME49_248340	_LTNQPALSFVGEHAK_	BirA control	3	537.954	-0.3523	8.6012e-13	140.22	126.8	1035500000
TGME49_202680	_VISPQEFCTAIDAVTEADIK_	mitoBirA	3	736.368	-0.94383	8.4518e-07	102.67	95.088	1035400000
TGME49_309752	_MPIDINQGISEPR_	BirA control	2	735.374	0.1307	1.0452e-13	157.2	140.43	1035400000
TGME49_314400	_CFFSLEAPIKR_	mitoAPEX	3	456.576	-0.01558	0.00018183	88.596	83.702	1035000000
TGME49_260180	_VYLDDETTVEQLK_	mitoBirA	2	776.891	0.089521	7.9195e-07	123.28	77.995	1034700000
TGME49_311430	_LGATIVGGVANMPIKPGSK_	BirA control	3	604.013	-0.19368	2.3571e-06	97.271	91.898	1033900000
TGME49_273760	_SINPDEAVAYGAAVQAAILK_	mitoBirA	3	667.693	-0.22915	1.0228e-15	138.46	131.51	1033600000
TGME49_289690	_VIMSAPPKDDTPMFVMGVNNDQYK_	mitoAPEX	3	899.762	-0.19779	2.2548e-41	174.7	170.8	1033400000
TGME49_247510	_AGLADILGAAGNQNVQGEEQQK_	BirA control	3	737.705	0.13675	1.745e-07	105.94	95.799	1033200000
TGME49_209600	_VIDTQAGELGLSLGGAEGTSHAK_	mitoBirA	3	737.713	1.1543	3.3845e-31	163.18	151.76	1033000000
TGME49_284190	_HNVDAIHPGYGFLSENAEFAAAVENAGLMLVGPPPEVIR_	BirA control	4	1026.27	0.85544				1032500000
TGME49_270510	_QAIPVFGCGSTR_	mitoBirA	2	646.824	0.14029	0.00053649	85.554	77.826	1032200000
TGME49_284190	_FYAPFEATATVK_	mitoAPEX	2	672.845	-0.83891	0.0019054	73.082	54.946	1031900000
TGME49_227948	_YTGGILPVTDIR_	mitoBirA	2	652.864	-1.0848	0.00012617	105.65	86.521	1031600000
TGME49_244200	_YIHMGVLANPSHLEAVDPLVIGQAR_	mitoBirA	2	1350.72	0.011693	4.9598e-16	133.76	125.89	1031100000
TGME49_244200	_HLVRPDVPAAPQLTGVPLDR_	mitoBirA	2	1076.11	-0.14883				1030100000
TGME49_309820	_VLEQLTGQRPQFSK_	mitoAPEX	2	815.949	-0.10159	2.0066e-07	129.77	105.36	1029800000
TGME49_221320	_DADPYPEVDR_	mitoAPEX	2	588.762	-0.017864	0.0033042	78.342	64.332	1029600000
TGME49_239100	_IVKPQGVEPTEIENEVAK_	mitoAPEX	3	660.693	0.3592	0.00060751	69.081	62.481	1029300000
TGME49_204400	_CVDALVPVGR_	mitoBirA	2	543.292	0.015885	0.00024535	107.79	73.912	1029000000
TGME49_289530	_ALQEQLEAR_	BirA control	2	529.285	0.16409	0.0018853	104.39	23.706	1028700000
TGME49_223050	_LIDLHSPSDVVK_	mitoAPEX	3	441.582	-0.24654	0.00017079	80.245	52.068	1027600000
TGME49_244200	_LHDQELAQLLQDALDINR_	mitoAPEX	3	702.371	-0.1991	4.4845e-07	102.89	84.314	1027300000
TGME49_284190	_VFDSLNFVENLK_	APEX control	2	712.875	0.47035	2.1897e-06	128.57	86.482	1026600000
TGME49_320220	_HLDQEVTDVSQLVEPVSSPHQTEGWFK_	mitoBirA	3	1031.5	0.063606	1.9203e-44	184.76	177.89	1026500000
TGME49_284190	_IMNVASEGAPR_	mitoAPEX	2	572.793	-0.53401				1026300000
TGME49_221320	_LFLHIVSPLNLASAK_	mitoBirA	2	811.985	0.038865	5.4571e-09	110.97	106.33	1026100000
TGME49_239100	_DAVFSFPQHVY_	mitoAPEX	2	655.314	-3.0768				1026000000
TGME49_294800	_GCATFLAQVIVLNHPGEIK_	APEX control	3	689.707	-1.3921	0.00093758	65.924	60.667	1025600000
TGME49_232230	_VSCLAVTDPGDSDIIR_	mitoBirA	2	859.425	-0.89212	8.6121e-10	120.63	98.077	1025400000
TGME49_262690	_YINVNHLMPTR_	mitoAPEX	3	453.24	-0.29383	0.0042018	58.132	48.695	1025100000
TGME49_319920	_ERPAPVSEPAAASPSVGAEASSTTFSASPATR_	mitoBirA	4	772.381	0.10832				1025000000
TGME49_244200	_QNILAFYNAEYEK_	mitoAPEX	2	801.894	-0.14098	2.1585e-05	95.264	81.181	1024900000
TGME49_311720	_SQVDEIVLVGGSTR_	mitoBirA	2	730.391	0.079909				1024900000
TGME49_274060	_AVAGLAAGGLGSFFGNPADLALIR_	mitoAPEX	3	753.415	0.50505	2.2829e-68	221.86	215.26	1024600000
TGME49_239490	_VDGNDLFASLLATK_	mitoBirA	2	732.391	-1.3907	0.00011058	77.746	67.674	1024400000
TGME49_261570	_NCPVLAIDNVR_	mitoAPEX	2	635.832	-0.012697	9.6723e-05	119.03	108.8	1024200000
TGME49_290600	_MLEVMQAAGLH_	mitoAPEX	2	600.299	-0.59479				1024100000
TGME49_221320	_KIVDFSGLLDLPR_	BirA control	3	491.621	-0.01384	6.9258e-07	118.24	94.563	1023900000
TGME49_216530	_WTLQQEGNTAVR_	mitoBirA	2	701.857	0.19254	6.6541e-08	150.14	126.47	1023600000
TGME49_249900	_AMLFGPNNDANLFYK_	mitoBirA	2	857.917	-0.14852	8.9797e-07	92.265	87.962	1023400000
TGME49_310490	_NQYTCPTVNVDK_	BirA control	2	719.835	-0.26807	5.5329e-05	115.92	108.55	1023300000
TGME49_218560	_EQLVNALDGYQIPR_	BirA control	2	808.426	0.25803	1.5895e-08	136.33	121.16	1023300000
TGME49_249900	_GAWANVLR_	BirA control	2	443.748	-0.91395				1023000000
TGME49_206470	_GTLGGTCLNVGCIPSK_	mitoAPEX	2	817.405	-0.50169	3.3631e-11	127.05	117.13	1022700000
TGME49_268830	_TFYTNQVQILDR_	mitoBirA	2	749.388	0.067208	1.4085e-06	133.32	111.27	1022400000
TGME49_306670	_HLMLNPDICVR_	mitoAPEX	2	684.35	-0.25975				1022200000
TGME49_221320	_FVLDAIIGDPDKFIGVENLR_	mitoBirA	3	744.407	0.80725	7.0172e-10	115.42	109.75	1022000000
TGME49_270510	_LAALLDGGEASVEK_	mitoBirA	2	686.87	0.22514	0.00038822	73.722	55.649	1021700000
TGME49_309752	_SKDCTQIEVNPLVETHDGR_	mitoBirA	4	550.268	-0.060628	0.00039645	73.294	71.885	1021400000
TGME49_226590	_MNVWGNHDLLMK_	mitoBirA	2	729.355	-0.72513	9.3245e-08	147.26	130.05	1021300000
TGME49_239330	_TCGACGYPNAK_	BirA control	2	599.753	-1.7237	0.00021281	106.62	90.241	1021000000
TGME49_251780	_(gl)QAVTNPENTVFATK_	mitoAPEX	2	751.878	0.25367	1.2442e-06	112.02	96.477	1020400000
TGME49_230410	_(gl)QVCPANWR_	mitoBirA	1	1013.46	0.30087				1020300000
TGME49_207440	_HLGGFDIIHLR_	BirA control	3	426.575	0.02564	3.0773e-06	143.96	137.93	1020200000
TGME49_286530	_LPSLHACTHAEIASFFDVENMLQK_	mitoBirA	4	690.339	-1.6308	1.1247e-41	177.08	166.27	1020100000
TGME49_313140	_DQTEDKVTLEAAEAIK_	mitoBirA	3	587.635	0.32819	8.3523e-10	112.34	98.254	1019900000
TGME49_313140	_TVVSEAAHGTVTR_	mitoBirA	2	664.352	-0.4432	4.8739e-11	145.81	108.49	1019800000
TGME49_312090	_LPACSLGDLVLATVK_	mitoBirA	3	519.629	-0.25273	1.92e-10	122.78	112.01	1019700000
TGME49_221320	_NNYANVDLICQIAVQEK_	mitoBirA	2	996.496	-0.16705	2.0244e-44	219.68	215.01	1019500000
TGME49_202680	_LEHMPDQMVSELLHTTAWHNNTLGHK_	mitoBirA	5	608.697	0.087752	3.2573e-09	97.057	92.26	1019400000
TGME49_221320	_DIFDQATVK_	mitoAPEX	1	1036.53	0.20798				1019300000
TGME49_232090	_YRPAPLLVQYVDAGFLGR_	mitoBirA	3	679.042	-1.1763	6.6606e-32	176.29	162.35	1018700000
TGME49_289690	_LVELAHYMSVQDGA_	mitoBirA	2	766.874	-0.25427	1.048e-07	124.51	110.08	1018700000
TGME49_262690	_YINVNHLMPTR_	BirA control	3	453.24	-0.36041	0.00023982	85.813	73.544	1018300000
TGME49_227600	_ALPGIPAVAPHR_	mitoAPEX	3	400.24	-0.10475				1018200000
TGME49_300140	_AQSDLAQALNAVDAHLK_	mitoBirA	3	588.979	0.34766	5.144e-20	145.33	131.63	1018000000
TGME49_270510	_QAIPVFGCGSTR_	mitoBirA	2	646.824	-0.11916	0.0019054	73.082	68.193	1017800000
TGME49_222910	_EAFPDRPLLQDPLLAEGVPAEPVPPSR_	mitoAPEX	3	970.85	0.073234	8.8552e-13	113.87	111.31	1017800000
TGME49_210690	_MGAEVAGDSIGDEFK_	mitoBirA	2	763.346	-1.0692	3.2277e-15	155.06	146.17	1017500000
TGME49_308090	_VPASSTTTSASEGIFR_	mitoBirA	2	805.905	-0.63931	3.5427e-15	152.34	139.15	1016800000
TGME49_236140	_VPVLPFASLGSFYGQLASQAGTSDAEGR_	mitoBirA	3	942.475	0.27577	1.6242e-36	173.35	169.26	1016500000
TGME49_306670	_HLMLNPDICVR_	mitoBirA	3	456.569	-0.67725	0.0001132	91.658	73.052	1016200000
TGME49_311720	_VEVENLMEGVDFSETLTR_	mitoBirA	2	1034.5	-0.88023	9.1466e-61	247.61	232.73	1016100000
TGME49_221320	_LSVSSHQGSWLHTK_	mitoBirA	3	522.939	-0.86478	1.8672e-09	138.55	117.74	1014700000
TGME49_261570	_VPPAINQFTHTLDK_	mitoBirA	3	527.619	0.036737	0.00031529	64.52	59.465	1014600000
TGME49_221320	_ATLDSTGAIPR_	mitoAPEX	2	551.299	-0.91121	6.6783e-05	122.69	90.276	1014300000
TGME49_312090	_LPACSLGDLVLATVK_	mitoBirA	3	519.629	-0.23881	1.2667e-11	129.77	119.13	1014200000
TGME49_294800	_SVEMHHEVMEQAVPGDNVGFNVK_	mitoBirA	2	1277.1	-0.27884	8.2636e-22	141.45	137.74	1014000000
TGME49_218560	_IQDLLPVYK_	BirA control	2	544.821	0.45026	0.0026827	100.02	56.209	1013800000
TGME49_288750	_DHGLMYDDLYSDKEPVFAR_	mitoBirA	4	568.515	0.029577	3.2268e-15	133.32	125.84	1013200000
TGME49_244200	_LIACSGQVYYDLIAGK_	mitoAPEX	2	885.958	1.948	1.1187e-06	92.264	61.78	1012700000
TGME49_268830	_LRDGAQEVQTVIER_	mitoBirA	2	807.434	-0.70956	6.0315e-08	137.61	98.608	1012200000
TGME49_313390	_VDISGVDVSSIKDEQFGASK_	BirA control	3	694.351	-0.26152	1.2054e-09	108.71	102	1012100000
[truncated: 103,474 more rows]

## Sheet: 2. mitoAPEX proteome raw
AccessionNumber	Log2 Protein Ratio RH control vs mitoAPEX	Protein PValue RH control vs mitoAPEX	Sequence Count Unique - RH control	Sequence Count Unique - mitoAPEX
TGME49_200310	-0.12749	0.807593		1
TGME49_201120	-2.23431	0.222959		1
TGME49_201150	-0.518511	0.417188		1
TGME49_201210	-2.21511	0.001344		4
TGME49_201380	-4.2885	0.00926752	1	8
TGME49_201400	0.378288	0.807593	1
TGME49_201520	-1.73976	0.564918	1
TGME49_201680	-1.62454	0.0734983	18	27
TGME49_201700	-0.940703	0.243854	4	5
TGME49_201780	-2.66989	0.0330742		6
TGME49_201800	-3.35401	0.000185788		4
TGME49_201840	2.1027	0.807593	1
TGME49_201880	-3.2657	0.00481058		3
TGME49_202080	-1.2172	0.222959		2
TGME49_202240	-2.42924	0.564918		2
TGME49_202350	-3.30215	4.63654e-10		8
TGME49_202370	-0.559584	0.704464	12	12
TGME49_202390	-1.4627	0.89993	3	5
TGME49_202460	0.0585337	0.974831	2	2
TGME49_202500	-3.60099	0.90995		1
TGME49_202510	-0.722628	0.775661	1	1
TGME49_202530	-1.33672	0.271485	6	9
TGME49_202630	-4.52708	6.46384e-26	5	31
TGME49_202640	0.18676	0.807593		1
TGME49_202680	-5.35933	1.53063e-20	10	21
TGME49_202720	-2.38805	0.564918		1
TGME49_202770	-1.24123	0.515648	1	3
TGME49_202950	0.924996	0.222959		1
TGME49_202960	-4.1666	0.000122004		3
TGME49_203020	-1.07422	0.807593		1
TGME49_203060	-1.36922	0.0100191		5
TGME49_203220	-3.38429	0.390591	1	4
TGME49_203240	-0.858224	0.152093		6
TGME49_203310	-1.17977	0.564918	3	3
TGME49_203390	-1.12743	0.279812	1	1
TGME49_203450	0.50955	0.807593		1
TGME49_203480	0.463119	1	1
TGME49_203490	-0.471051	0.661924	1	1
TGME49_203520	-3.86061	3.81416e-05		9
TGME49_203540	-0.379304	0.564918		1
TGME49_203620	-2.27442	0.0107597		2
TGME49_203630	-0.264353	0.661096	3	3
TGME49_203730	-2.97988	3.05921e-12		14
TGME49_203840	-0.292421	0.186206		4
TGME49_203940	-1.99922	0.00440628		6
TGME49_203980	1.05164	0.564918	1
TGME49_203990	-1.73626	0.0855658	2	3
TGME49_204020	-1.658	0.012486	6	7
TGME49_204050	-0.202129	0.951442	2	2
TGME49_204370	-3.07076	0.0353067	1	2
TGME49_204400	-6.38999	5.86102e-16	11	19
TGME49_204410	-3.41831	0.00207985		5
TGME49_204480	-2.13531	0.222959	3	8
TGME49_204490	1.30199	0.807593		1
TGME49_204530	-0.264538	1		1
TGME49_204550	-1.97708	6.84241e-06	2	11
TGME49_205010	-1.37048	0.014077	1	4
TGME49_205040	-2.95641	0.222959		1
TGME49_205130	-1.51168	0.357788	1	2
TGME49_205180	2.3659	0.179908	2
TGME49_205190	-2.34534	0.0197478		2
TGME49_205220	-1.77781	0.564918		1
TGME49_205240	-0.258884	0.417459	3	3
TGME49_205250	-2.32018	0.486604	2	3
TGME49_205350	-4.2078	0.0902746	2	4
TGME49_205380	0.00162387	0.872863	10	8
TGME49_205440	-0.363503	1	11	11
TGME49_205470	-0.833441	0.0360875	16	21
TGME49_205510	-0.391786	0.679068	9	11
TGME49_205570	-2.68698	0.286654		5
TGME49_205680	0.990042	0.564918		1
TGME49_205700	0.228655	0.606608	3	3
TGME49_205710	-0.935938	0.00271122	1	6
TGME49_206470	-5.64643	2.51813e-17	4	21
TGME49_206480	-6.7398	0.000265693		3
TGME49_206500	-1.83179	0.00032627		8
TGME49_206510	-0.188299	1	1	1
TGME49_206590	-1.10455	0.222959		1
TGME49_206610	-2.75293	0.564918	9	16
TGME49_206670	0.505838	1	1
TGME49_206690	-0.871171	1		1
TGME49_207040	-1.52039	0.807593		1
TGME49_207060	-1.92625	0.179908	1	2
TGME49_207170	-4.16704	0.0326949		3
TGME49_207390	-0.159088	1		1
TGME49_207440	-1.82215	0.0107597	11	12
TGME49_207450	-0.735801	0.807593	1	1
TGME49_207460	-0.853283	0.90995		2
TGME49_207620	-4.2839	7.44913e-19	12	23
TGME49_207640	-1.29356	0.0187733	9	10
TGME49_207710	0.212656	0.502276	1	2
TGME49_207720	-4.85394	0.128067		2
TGME49_207760	-3.59926	4.39132e-12	1	13
TGME49_207770	-2.13276	0.0568635		2
TGME49_207800	-2.49609	0.0419177		3
TGME49_207840	-0.39946	0.904155	2	2
TGME49_207940	-2.34507	0.363356		1
TGME49_208090	-2.03367	0.417188		2
TGME49_208530	-1.41378	0.807593	1
TGME49_208560	-0.0840529	1	1	1
TGME49_208590	-1.28319	0.47887		5
TGME49_208790	-3.97347	2.58004e-11	7	14
TGME49_208842	-4.96174	0.222959		1
TGME49_209010	-2.67606	5.60029e-07		7
TGME49_209030	-0.540836	0.68922	12	16
TGME49_209150	-2.94426	1.03831e-07	7	12
TGME49_209210	-1.18385	0.90995		2
TGME49_209260	-7.8557	2.56359e-18		16
TGME49_209290	-1.07192	0.807593	2	2
TGME49_209540	-1.31943	0.393556		4
TGME49_209550	-0.921306	0.222959		1
TGME49_209580	-2.30669	0.000785237		4
TGME49_209600	-1.49146	0.236356	11	15
TGME49_209680	-2.48315	0.0095026		3
TGME49_209720	-1.03859	0.328669	3	3
TGME49_209850	0.215966	1		1
TGME49_209870	-0.928106	0.279812		2
TGME49_209910	-0.128392	1	1	1
TGME49_209960	0.652865	0.807593		1
TGME49_209985	-1.14312	0.564918	1	1
TGME49_210230	-0.772672	0.807593		1
TGME49_210370	-1.72835	0.248719	3	5
TGME49_210690	-1.30743	0.235761	8	9
TGME49_210700	-3.74255	0.363356		1
TGME49_210730	-3.69328	2.51595e-17	1	17
TGME49_210750	-2.7409	7.79824e-07		11
TGME49_210790	-3.53707	5.90566e-08		7
TGME49_210840	-0.710531	0.0992346	1	4
TGME49_210960	-0.793157	0.564918		1
TGME49_210980	-1.15445	0.661924		2
TGME49_211060	-3.45145	0.0402636		3
TGME49_211090	-4.35526	8.0619e-16	2	16
TGME49_211230	0.417447	1		1
TGME49_211300	1.93004	0.222959		2
TGME49_211410	0.241843	1		1
TGME49_211440	4.27808	0.179908	2
TGME49_211480	-1.54237	1		1
TGME49_211670	1.81126	0.00642537	10	6
TGME49_211680	-1.73506	0.00458368	4	17
TGME49_211690	-3.32851	1.28477e-12	3	24
TGME49_211710	-0.65122	1	1
TGME49_212090	1.71646	0.807593	1
TGME49_212220	-0.696449	0.807593		1
TGME49_212250	-1.27923	0.0517587	6	9
TGME49_212260	-4.10547	0.502276		2
TGME49_212290	1.12892	0.807593	1	1
TGME49_212300	-0.825072	0.791297	3	2
TGME49_212860	0.885796	0.222959	1
TGME49_212930	-3.86196	4.39132e-12		12
TGME49_213069	-3.28022	0.222959		1
TGME49_213072	-1.60794	0.661924		2
TGME49_213310	-3.10405	6.34669e-11		15
TGME49_213350	-1.65437	0.365508	3	4
TGME49_213420	-2.52535	3.27526e-08		9
TGME49_213600	-0.460168	0.357788		2
TGME49_213670	-2.53824	0.0291005		4
TGME49_213770	1.47967	0.128067	1	1
TGME49_213810	-2.02065	0.0568635		2
TGME49_213910	-2.30132	0.0909452	2	6
TGME49_213940	-2.47423	0.0568635		2
TGME49_214080	-1.78001	0.363356		1
TGME49_214090	-0.498026	0.365508	2	6
TGME49_214110	-1.86707	0.564918		2
TGME49_214150	-0.991531	0.564918	1	1
TGME49_214210	-0.020137	0.807593	6	7
TGME49_214250	-2.97422	0.0291005		3
TGME49_214260	1.45009	0.564918	1
TGME49_214270	-0.43194	0.352456	2	4
TGME49_214290	-1.30765	0.00232389	3	4
TGME49_214310	-2.97842	5.47484e-06		6
TGME49_214320	-2.00869	0.222959	1	3
TGME49_214350	1.00043	0.564918	2	1
TGME49_214370	-3.89437	0.279812		2
TGME49_214440	-1.582	0.124994	5	7
TGME49_214530	-2.04163	0.807593		1
TGME49_214575	-2.7998	0.564918		2
TGME49_214600	-0.288242	0.564918		1
TGME49_214750	-7.99745	1.20367e-23	2	30
TGME49_214770	-1.88248	0.222959	1	3
TGME49_214790	-5.55057	6.00329e-08		7
TGME49_214840	-1.5828	0.807593		1
TGME49_214870	-2.08343	0.000517995		4
TGME49_214930	-1.76712	0.138002		4
TGME49_215020	-1.85962	0.564918		1
TGME49_215060	-3.6774	0.00218525	3	7
TGME49_215220	-4.56376	0.363356		1
TGME49_215250	-2.61781	0.109296		3
TGME49_215260	-1.55645	0.0424677	10	17
TGME49_215280	-5.46358	5.21537e-10		13
TGME49_215290	-0.13208	1	3	2
TGME49_215350	-6.93563	1.07105e-09		7
TGME49_215370	-0.41404	0.807593		2
TGME49_215430	-2.16893	0.807593		1
TGME49_215460	-2.29387	0.00223562	5	5
TGME49_215470	-2.24008	0.363356		1
TGME49_215520	0.367234	0.564918		1
TGME49_215590	-6.68434	2.31498e-28	7	26
TGME49_215660	-1.20088	0.502276		2
TGME49_215710	-4.75974	6.47839e-10		16
TGME49_215775	1.50525	0.0353067	2
TGME49_215785	0.218882	1	2	1
TGME49_215910	-0.398388	0.606608	1	2
TGME49_215920	-2.94322	0.0894608		2
TGME49_215940	0.0033981	1	1	1
TGME49_215980	-0.855392	0.363356	2	3
TGME49_216000	3.31	0.0353067	2
TGME49_216010	-3.07458	0.104271		3
TGME49_216020	-1.1682	0.807593		1
TGME49_216040	-3.72529	0.807593		1
TGME49_216180	-2.65048	0.0961303		3
TGME49_216260	-0.427267	0.736453	2	2
TGME49_216480	0.289488	1		1
TGME49_216500	-1.58416	0.179571	1	2
TGME49_216510	-2.31493	0.0326949		3
TGME49_216530	-4.2381	0.000122004		4
TGME49_216590	-0.953971	0.116141	3	7
TGME49_216600	-1.6427	0.0192641		6
TGME49_216620	1.82767	0.564918	1
TGME49_216650	0.542675	1	2	2
TGME49_216660	-2.82703	1.08999e-06	1	5
TGME49_216670	-2.04351	0.0580971	11	20
TGME49_216790	-0.736203	0.906978	16	16
TGME49_216860	-0.861709	0.155224	11	19
TGME49_216880	-0.875846	0.15017	13	13
TGME49_216900	-0.328352	0.502276		2
TGME49_217020	-4.47135	1.11413e-16	1	19
TGME49_217050	-1.55412	0.807593		1
TGME49_217460	-0.279333	0.612203	12	16
TGME49_217470	-0.904732	0.128067		2
TGME49_217540	-1.05053	0.574046	3	3
TGME49_217570	-3.24695	0.417188	1	2
TGME49_217600	-3.38562	0.222959	1	3
TGME49_217680	-0.920294	0.775661		2
TGME49_217740	1.10373	0.776066	2	2
TGME49_217820	-0.714662	0.448103	9	11
TGME49_217890	-1.73915	0.0755626	1	5
TGME49_218220	0.499354	1		1
TGME49_218250	1.72065	0.222959		1
TGME49_218280	-0.273445	0.363356	10	11
TGME49_218300	-1.20299	0.417188		2
TGME49_218410	-2.02294	0.363356	4	6
TGME49_218490	-0.0801722	1		1
TGME49_218540	-1.51782	0.704464	5	6
TGME49_218560	-1.93493	0.142658	68	93
TGME49_218580	-0.796699	0.807593		1
TGME49_218590	-1.89819	0.0221051	1	5
TGME49_218720	-2.08342	0.128067		2
TGME49_218790	-1.21307	0.807593	2	3
TGME49_218820	-3.17499	0.03438	3	7
TGME49_218840	-3.47253	7.17126e-13	2	24
TGME49_218940	-3.44557	0.0244155		4
TGME49_219140	-0.708244	0.285282	1	3
TGME49_219200	-0.957444	0.807593	1	1
TGME49_219250	0.758889	0.729667	1	2
TGME49_219270	-1.43994	0.186206	2	3
TGME49_219280	-0.194676	0.283392	6	8
TGME49_219320	-1.01455	0.367596	7	9
TGME49_219440	3.08621	0.807593		1
TGME49_219520	-0.910346	0.457496	3	6
TGME49_219540	-1.55056	0.0281533	17	27
TGME49_219550	-6.53135	5.53261e-20	3	17
TGME49_219590	0.228467	0.821043	3	4
TGME49_219630	-2.82079	0.0113456		4
TGME49_219682	-4.30938	1.41591e-11	2	16
TGME49_219710	0.72449	0.564918		1
TGME49_219720	-1.3064	0.36653	3	4
TGME49_219750	-0.305226	0.430705	4	4
TGME49_219770	-0.78156	0.807593		1
TGME49_219790	-0.633408	0.905437	2	2
TGME49_219800	-0.0431783	1	18	14
TGME49_219850	-2.84484	1.37819e-10	14	25
TGME49_220100	-2.76838	3.55226e-05	7	12
TGME49_220132	1.37743	0.363356		1
TGME49_220260	-2.3793	0.564918	1	2
TGME49_220270	1.05302	0.807593	1
TGME49_220350	-3.92457	1	1	2
TGME49_220400	-0.638479	0.489845	3	4
TGME49_220480	-0.417115	1		1
TGME49_220860	-0.991855	0.489845	2	6
TGME49_220930	0.0853657	0.574046	2	3
TGME49_220950	4.74785	1	1
TGME49_221320	-0.92066	0.00126269	124	139
TGME49_221380	-0.87162	0.0853242	4	6
TGME49_221430	-2.51776	0.222959		1
TGME49_221510	-5.18952	0.000374934		4
TGME49_221522	-1.92718	0.0244155	2	7
TGME49_221590	0.345622	1		1
TGME49_221600	-2.55618	0.564918		1
TGME49_221620	-0.850856	0.775661	1	2
TGME49_221690	0.0710414	1		1
TGME49_221850	-2.85912	0.222959		1
TGME49_221870	0.422551	0.90995	1	1
TGME49_221922	2.2868	0.363356	1
TGME49_221940	-0.761899	0.564918		1
TGME49_222000	-1.63977	0.417188	1	2
TGME49_222020	-1.82533	0.775661		2
TGME49_222100	-2.01153	0.222959		1
TGME49_222120	-1.23267	0.179908		2
TGME49_222210	-3.42129	5.4375e-11	1	15
TGME49_222380	-2.02378	0.295758	6	8
TGME49_222390	-0.656271	0.222959		2
TGME49_222410	1.29992	0.775661	1	1
TGME49_222660	-0.870416	1		1
TGME49_222840	-0.193652	0.564918	1	1
TGME49_222860	-0.762757	0.929654	5	7
TGME49_222900	-1.84032	0.0894608		2
TGME49_222910	-5.74982	4.54137e-18		18
TGME49_222952	-3.3885	0.00389891		4
TGME49_222990	-0.454726	1		1
TGME49_223000	-1.03101	0.179908	1	1
TGME49_223040	-2.22921	0.0568635		1
TGME49_223050	-2.43876	0.108507	2	4
TGME49_223140	-1.44989	0.150686	1	5
TGME49_223270	-2.44055	4.60718e-08		9
TGME49_223390	-1.25687	0.661924	10	15
TGME49_223500	-3.33722	5.72546e-09		11
TGME49_223540	-0.0384161	0.792102	1	6
TGME49_223660	-3.77837	0.068888		3
TGME49_223710	0.443235	0.502276	1	1
TGME49_223910	-1.61695	0.357788	2	4
TGME49_223920	-0.837478	0.000304658	46	57
TGME49_223940	0.219619	0.729667	1	2
TGME49_224060	-2.24435	0.0855658	1	6
TGME49_224090	-4.62575	2.95785e-09	2	8
TGME49_224220	-0.659715	0.807593	1	1
TGME49_224260	-1.1802	0.90995		2
TGME49_224340	-1.03953	0.279812		2
TGME49_224350	-3.08277	3.63345e-07	2	28
TGME49_224490	-3.51787	1.30286e-05		6
TGME49_224730	-2.69251	0.00245013		4
TGME49_224820	-2.26091	0.0894608		2
TGME49_224850	-1.03697	0.413743	10	10
TGME49_224890	0.647402	1		1
TGME49_224900	-1.96709	0.0291005		4
TGME49_224910	-2.42241	0.128067		2
TGME49_224990	-2.85961	0.0107597		2
TGME49_225080	-0.0740357	0.750901	4	4
TGME49_225125	-0.21397	0.90995	1	1
TGME49_225150	-0.308851	0.363356	3	4
TGME49_225240	-2.64357	0.128067		2
TGME49_225380	-2.53391	1.30667e-07		8
TGME49_225470	-4.01692	0.00447562		3
TGME49_225510	-0.303846	1		1
TGME49_225550	-2.74785	7.2235e-05		8
TGME49_225730	-5.31954	0.0353067		2
TGME49_225850	-2.75579	0.223706		4
TGME49_225940	-0.661385	0.363356		3
TGME49_225980	-1.96145	0.0551494		4
TGME49_225990	-0.935075	0.564918		1
TGME49_226000	-2.27782	0.000206437		5
TGME49_226010	-0.781376	0.807593		1
TGME49_226030	-0.692763	0.363356	4	5
TGME49_226060	0.0916143	1	1	2
TGME49_226080	-0.447796	1	1
TGME49_226090	-2.02192	0.00440628		6
TGME49_226250	-1.71716	1.17139e-05	15	26
TGME49_226280	-3.07868	0.138426		4
TGME49_226380	-0.793851	0.807593	1
TGME49_226410	-2.25299	0.124915	1	4
TGME49_226430	-0.96728	0.904155	2	2
TGME49_226500	-3.27588	0.00481058	1	3
TGME49_226590	-4.45722	7.03153e-06		6
TGME49_226660	-0.0561101	1	1	1
TGME49_226710	-0.234648	0.18591	3	4
TGME49_226730	-6.62424	2.69693e-35	14	40
TGME49_226830	0.265003	0.0778765	17	12
TGME49_226860	3.07147	0.222959	1
TGME49_226870	-1.86292	0.807593		1
TGME49_226960	-1.18559	1.73221e-07	32	41
TGME49_226970	-1.71729	0.0359698	9	9
TGME49_227030	-0.887968	0.90995	5	5
TGME49_227140	-3.11612	0.00299996		3
TGME49_227280	-0.609061	0.606608	2	2
TGME49_227290	-1.62406	0.493101	1	3
TGME49_227300	-1.17268	0.00218525		7
TGME49_227310	-3.08247	0.222959		1
TGME49_227360	-1.44933	0.00127057	11	14
TGME49_227400	-2.37227	0.0172146		3
TGME49_227420	-2.08878	0.564918	1	2
TGME49_227600	0.168949	0.932415	2	3
TGME49_227620	1.17022	0.665764	2	2
TGME49_227650	-0.721967	1		1
TGME49_227810	0.972958	0.807593		1
TGME49_227830	-2.90806	1.04088e-05		7
TGME49_227860	-0.982094	0.564918		1
TGME49_227870	-1.80749	0.363356		1
TGME49_227900	-1.35128	0.363356		1
TGME49_227910	-4.68203	0.00664277		2
TGME49_227920	-2.50148	0.222959		1
TGME49_227948	-5.53808	1.13892e-38	14	46
TGME49_227960	-1.08635	0.776066	2	4
TGME49_227990	-2.6871	2.0304e-07	2	10
TGME49_228060	-1.28221	0.564918		1
TGME49_228170	-0.151059	1	13	12
TGME49_228190	0.996278	0.775661	2	1
TGME49_228210	-1.49912	1	1	2
TGME49_228250	-3.32567	4.28846e-07	1	12
TGME49_228290	1.02145	0.448507	5	4
TGME49_228320	-2.84367	0.222959		1
TGME49_228470	-1.49148	0.286959	6	6
TGME49_228770	-1.57764	0.363356		1
TGME49_229000	1.07503	0.222959	1	1
TGME49_229010	0.123729	0.61481		4
TGME49_229180	-0.61992	0.573076	11	13
TGME49_229210	-1.54186	0.357788		1
TGME49_229250	-3.05991	0.068888	2	3
TGME49_229310	1.04239	0.357788		2
TGME49_229340	-3.86637	0.0853242	1	7
TGME49_229360	0.484446	0.255203	10	8
TGME49_229420	0.554099	0.90995	2	1
TGME49_229620	-2.47101	1.19909e-09		14
TGME49_229670	-0.0817278	0.697259	3	5
TGME49_229690	0.919022	0.807593		1
TGME49_229740	-1.4803	0.000135528	3	8
TGME49_229900	-2.02129	0.000234125		5
TGME49_229920	-6.39595	3.3664e-12		12
TGME49_229950	-1.79433	0.930433	2	4
TGME49_229990	-0.622327	0.141179	22	21
TGME49_230050	-3.73563	0.0197478		2
TGME49_230070	-2.21374	0.363356		1
TGME49_230100	-0.388254	0.222959	1
TGME49_230160	3.67956	0.807593	1
TGME49_230220	-0.740564	0.222959		1
TGME49_230350	-0.948456	0.189239	4	6
TGME49_230380	-1.10177	0.363356		1
TGME49_230410	-9.26947	2.37747e-18	3	11
TGME49_230420	-1.31219	0.0272779	12	21
TGME49_230430	-1.74708	0.222959		1
TGME49_230450	-0.228389	0.797515	8	8
TGME49_230520	-4.5357	1.76797e-05	1	5
TGME49_230630	-3.74516	0.222959		1
TGME49_230910	-3.42047	0.000185788		4
TGME49_230920	0.573276	0.222959		1
TGME49_230940	-0.864185	0.417188		2
TGME49_230960	-0.524486	0.839763	7	8
TGME49_231080	1.04075	0.222959	2	2
TGME49_231120	-1.65445	0.0107597		2
TGME49_231130	0.379546	0.807593	1	1
TGME49_231140	-1.50836	0.929945	3	4
TGME49_231150	-2.75997	1.02736e-09	4	13
TGME49_231160	-0.248328	1	1	1
TGME49_231210	-0.731037	1	1
TGME49_231350	-2.23844	1.6396e-05		9
TGME49_231370	-3.18796	0.363356		1
TGME49_231410	-4.84564	1.14099e-16		20
TGME49_231430	-1.70999	1		1
TGME49_231460	-4.02299	1.02905e-06		7
TGME49_231480	-1.18537	0.115104	3	11
TGME49_231600	-6.70699	0.564918		1
TGME49_231630	0.21456	0.458727	7	6
TGME49_231640	1.42087	0.00420546	11	6
TGME49_231750	-1.32834	0.000425939	1	8
TGME49_231815	-2.24118	0.222959		1
TGME49_231850	1.63568	0.222959	5	3
TGME49_231910	-5.89917	5.60398e-15	1	13
TGME49_231920	-1.38127	0.665764	2	2
TGME49_231940	-0.606234	0.90995	1	2
TGME49_231970	0.161153	0.95818	3	3
TGME49_232050	-2.48604	0.564918	1	1
TGME49_232090	-5.98707	2.4857e-13		14
TGME49_232100	0.11105	1		2
TGME49_232130	-0.0578879	0.807593	5	5
TGME49_232150	-0.773919	0.564918		1
TGME49_232180	-0.179609	1	1	1
TGME49_232190	-2.34337	0.363356		1
TGME49_232230	-3.47946	0.0232262	3	4
TGME49_232250	-1.09651	0.572693	4	5
TGME49_232260	-0.815465	0.807593	1	1
TGME49_232300	-1.6135	0.119685	6	9
TGME49_232350	0.267953	1	10	7
TGME49_232390	-0.0520884	1		1
TGME49_232530	-2.05287	0.00758156		4
TGME49_232540	-4.07062	4.00325e-13		21
TGME49_232600	-4.04183	0.363356		1
TGME49_232660	-1.64754	0.222959		1
TGME49_232710	-1.12952	0.00664383	14	17
TGME49_232730	0.187011	1		1
TGME49_232940	-1.33383	0.194956	13	16
TGME49_233000	-0.875729	0.502276	1	2
TGME49_233020	-1.6341	0.564918		1
TGME49_233100	-2.1743	0.0551494	2	7
TGME49_233110	-0.0343388	0.90995		2
TGME49_233170	-0.138709	0.807593		1
TGME49_233220	-0.0366372	0.999399	5	3
TGME49_233460	-0.263654	0.351823	7	8
TGME49_233470	-0.234037	1		1
TGME49_233490	-0.976214	0.286654		5
TGME49_233520	-0.668149	0.410864	5	7
TGME49_233890	-3.40408	1.64012e-15	2	16
TGME49_233930	-3.46449	4.23667e-08	1	12
TGME49_234190	-3.84972	0.000374934		4
TGME49_234230	-3.36674	0.222959		1
TGME49_234380	-1.78676	0.08368		5
TGME49_234420	-5.99292	5.65511e-22	1	21
TGME49_234450	-1.88791	0.0022673	4	6
TGME49_234505	-0.814101	0.128897	8	8
TGME49_235020	-0.33392	0.661924	3	5
TGME49_235150	-0.757841	0.661924		2
TGME49_235160	-1.00186	0.893617	12	14
TGME49_235398	-2.80733	0.0197478		1
TGME49_235402	2.62683	0.417188	1	1
TGME49_235470	-0.216244	0.179908	28	32
TGME49_235490	-1.00404	0.161795	2	6
TGME49_235540	-0.504318	1		2
TGME49_235560	-1.98445	0.222959		1
TGME49_235660	-1.50363	0.222959		1
TGME49_235880	-0.667298	0.222959		1
TGME49_235930	0.0381262	0.709675	12	18
TGME49_235970	-0.984539	0.629858	10	11
TGME49_236000	-0.883277	0.564918		1
TGME49_236040	-2.01532	0.138426	1	4
TGME49_236110	-1.10601	1		1
TGME49_236140	-3.12773	1.04247e-18	2	24
TGME49_236160	-0.812916	1		1
TGME49_236210	-5.41613	1.73009e-22	11	24
TGME49_236250	-2.53343	0.00389891		4
TGME49_236510	-3.68885	3.676e-08		6
TGME49_236520	-1.29703	0.222959		1
TGME49_236540	-0.450191	0.807593	3	4
TGME49_236550	-0.90635	0.222959		1
TGME49_236570	-1.36424	0.231366	6	8
TGME49_236650	-1.46735	0.000940409	11	16
TGME49_237010	-4.62578	3.28086e-24	9	26
TGME49_237120	-8.43846	0.179571		3
TGME49_237150	-2.28342	0.0506824	3	6
TGME49_237220	-2.98679	0.222959		1
TGME49_237250	-1.1399	0.574896	4	3
TGME49_237470	-4.29655	6.63953e-18		16
TGME49_237530	-2.72334	0.0326949		3
TGME49_237560	-5.51806	3.35538e-08		7
TGME49_237840	-1.02925	0.124915	1	4
TGME49_238000	-3.92199	0.0107597		2
TGME49_238010	-0.0281163	0.944172	6	8
TGME49_238040	1.25666	0.00664521	21	14
TGME49_238050	-0.623292	0.564918	11	15
TGME49_238070	-1.70511	0.564918	1	1
TGME49_238100	-2.29848	1		1
TGME49_238180	-0.734974	0.661096	1	3
TGME49_238250	1.16758	0.363356	1	1
TGME49_238940	0.116887	1		1
TGME49_238950	-1.92102	0.572693	2	5
TGME49_239080	-1.37266	0.363356		1
TGME49_239087	0.500394	0.807593		1
TGME49_239100	-2.5097	0.00806748	10	13
TGME49_239260	1.31391	0.363356	1
TGME49_239330	1.55826	0.197497	4	4
TGME49_239350	-1.70402	0.417459	1	3
TGME49_239400	-0.88888	0.661924		2
TGME49_239490	-6.22338	1.87404e-27	9	25
TGME49_239610	-3.07125	0.004719		5
TGME49_239620	1.08544	0.179908	1	2
TGME49_239680	0.782701	0.564918	1	1
TGME49_239720	-2.37607	0.001344		4
TGME49_239740	0.918601	0.357788	2	1
TGME49_239752	-2.31681	0.0553975	1	7
TGME49_239760	-0.260991	0.451715	4	3
TGME49_239790	-1.31646	0.564918		1
TGME49_239820	-0.950212	0.0748909	12	18
TGME49_240060	-1.85093	0.0855658	3	3
TGME49_240280	-0.553345	0.693305	2	4
TGME49_240510	-1.60087	0.222959		1
TGME49_240520	-1.6543	1	1	1
TGME49_240550	-1.56493	0.564918		1
TGME49_240590	-1.56674	0.363356		1
TGME49_240600	-1.84628	0.177071	7	13
TGME49_240640	-0.316389	1		2
TGME49_240650	-1.52935	0.000179364	14	21
TGME49_240670	-4.31201	0.000288474		3
TGME49_240810	-2.56342	0.173715	2	4
TGME49_240830	-4.61707	6.60987e-07		5
TGME49_240860	-1.4627	0.0113456	4	6
TGME49_240870	-1.19588	0.102398	3	10
TGME49_240890	-1.75556	0.179908		2
TGME49_241170	2.41557	2.03407e-13	24	12
TGME49_241880	-1.82029	1	1	1
TGME49_242030	0.405976	0.363356		1
TGME49_242070	-0.85705	0.398703	2	2
TGME49_242330	-2.04906	0.0160522	6	10
TGME49_242380	-1.27698	0.222959	2	2
TGME49_242460	-3.15025	2.58106e-06		8
TGME49_242660	-1.42836	0.222959	2	4
TGME49_242840	-4.51033	2.96349e-08		6
TGME49_243250	-2.19862	0.0573901	1	8
TGME49_243440	-0.861226	0.951442	1	2
TGME49_243490	-5.39494	3.98492e-08		8
TGME49_243530	-1.92625	0.0853242		4
TGME49_243540	-2.10771	0.493101	1	2
TGME49_243570	-2.85416	0.0745206	1	3
TGME49_243580	-3.01634	8.04943e-05		5
TGME49_243600	-1.01722	0.502276		2
TGME49_243710	-0.687782	0.247575	8	13
TGME49_243730	-3.66133	0.000265693		4
TGME49_243760	-2.52154	0.363356		1
TGME49_243800	-0.0971401	0.807593	9	13
TGME49_243910	-2.46482	0.0100191	1	7
TGME49_243920	1.79057	0.363356		1
TGME49_243950	-0.966715	0.164737	6	6
TGME49_243960	-2.29899	0.0353067	3	10
TGME49_244100	-1.31274	0.90995	1	1
TGME49_244200	-6.14309	3.81515e-51	13	54
TGME49_244310	-0.136297	1		1
TGME49_244320	-0.96919	0.553336	4	4
TGME49_244370	-1.66388	0.807593	1	2
TGME49_244440	1.81618	0.564918	1
TGME49_244460	0.180764	1		1
TGME49_244540	-2.06003	0.417188		2
TGME49_244560	-1.22027	0.0200321	25	31
TGME49_244570	-2.44934	0.00160956		7
TGME49_244630	-1.86525	0.00546493	1	5
TGME49_244650	0.361721	0.357788	2
TGME49_244690	-0.530681	0.502276		2
TGME49_244840	2.20711	0.000589346	3
TGME49_244870	-4.33494	2.46708e-05		5
TGME49_245450	-3.57165	0.0172146		3
TGME49_245460	-0.686269	0.303661	6	9
TGME49_245470	-0.380317	0.807593	3	5
TGME49_245490	-0.978945	0.564918		1
TGME49_245610	-0.703981	0.775661	1	2
TGME49_245620	1.21641	0.328455	2	3
TGME49_245670	-1.63927	0.515648		4
TGME49_245680	-2.53121	0.00447562	8	10
TGME49_246050	0.628114	0.179908		2
TGME49_246060	-2.36471	0.0419177		3
TGME49_246170	-2.20643	0.222959		1
TGME49_246330	0.773446	0.564918	1
TGME49_246530	-2.38929	0.000417313		9
TGME49_246540	-4.4997	1.34578e-08		9
TGME49_246630	-0.695977	0.807593		1
TGME49_246920	-3.29929	0.000318926		3
TGME49_247280	-2.61233	0.564918		1
TGME49_247300	1.04054	0.564918	1	1
TGME49_247350	-2.67144	0.807593		1
TGME49_247410	-4.44643	0.0246342		3
TGME49_247450	-1.43053	0.564918	1	1
TGME49_247460	1.09486	0.547659	1	3
TGME49_247470	0.737004	0.0894608	11	11
TGME49_247510	-3.52751	0.00633846	13	17
TGME49_247520	3.51084	0.222959	1
TGME49_247550	-11.1271	2.37288e-37	8	36
TGME49_247590	-1.40663	0.173715		4
TGME49_247648	-2.11331	0.128067	1	1
TGME49_247680	-4.06745	0.363356		1
TGME49_247740	-1.94158	0.0894608		2
TGME49_247760	-2.23425	0.363356		1
TGME49_247770	-7.19277	9.30169e-09		7
TGME49_248130	-2.49588	0.00218525	1	8
TGME49_248320	-3.8987	3.04149e-11	2	12
TGME49_248340	-1.11804	0.0210092	14	15
TGME49_248390	-2.25775	0.00139832	8	10
TGME49_248480	-0.730135	0.357788	8	8
TGME49_248600	-5.37398	1.06501e-13		18
TGME49_248630	-0.653884	0.821043	2	5
TGME49_248640	0.325929	1	1
TGME49_248790	-1.81398	0.0419177		3
TGME49_248810	-0.333938	0.938105	10	9
TGME49_248850	-1.6292	0.179908		2
TGME49_248880	-3.30763	0.00549791	2	6
TGME49_248950	-2.22672	3.39803e-05		7
TGME49_249000	-1.05723	0.417188		2
TGME49_249030	1.47463	0.564918		1
TGME49_249180	-3.22105	0.00143882		7
TGME49_249215	-1.50382	0.0551494		4
TGME49_249250	-1.36726	0.166335	4	6
TGME49_249270	-2.52557	0.190536	6	8
TGME49_249320	1.71137	0.417188	1	1
TGME49_249390	-3.04857	1.23375e-24	30	45
TGME49_249530	-0.174805	1	9	9
TGME49_249610	-0.631252	1	1	1
TGME49_249630	-3.94859	7.53452e-07		8
TGME49_249670	-2.32943	0.807593		1
TGME49_249690	-4.93491	1.06669e-08	1	8
TGME49_249702	-4.33323	2.66293e-06		6
TGME49_249730	-0.287788	0.904155	2	2
TGME49_249760	1.02595	0.564918		1
TGME49_249790	-1.69941	0.0353067		2
TGME49_249810	1.15231	0.564918		1
TGME49_249850	-2.5488	0.564918	1	2
TGME49_249870	0.312222	1	1
TGME49_249900	-4.32867	1.68939e-19	21	22
TGME49_249910	-2.50875	7.88643e-06		4
TGME49_249990	-1.36914	0.0628144	4	8
TGME49_250090	-1.36667	0.179571		3
TGME49_250340	0.347643	0.807593	1	1
TGME49_250770	-1.50344	0.000421687	21	25
TGME49_250820	-0.784668	0.502276	1	1
TGME49_250830	-1.68798	0.153879		4
TGME49_250900	-3.16263	0.00608658		4
TGME49_250910	-1.08386	0.0133826		3
TGME49_251500	-0.525555	0.271485	11	14
TGME49_251630	-2.89842	0.0961303		4
TGME49_251690	-2.3963	0.000492808	9	12
TGME49_251780	-6.89768	6.46279e-55	13	44
TGME49_251810	1.23149	0.222959	2
TGME49_251850	-0.237724	0.932415	2	3
TGME49_251870	0.463374	0.0745206	5	4
TGME49_251885	-3.04773	0.0186536	1	2
TGME49_251890	-2.49043	2.46708e-05	2	14
TGME49_251930	-3.83592	0.173715		4
TGME49_251950	-2.31372	0.179908		2
TGME49_252270	-3.44859	0.00321033		7
TGME49_252290	-0.78154	0.328455	4	6
TGME49_252360	-3.83682	0.283392	2	6
TGME49_252380	-1.1026	0.807593		1
TGME49_252430	-1.49909	0.564918		1
TGME49_252440	-1.86136	0.279812		1
TGME49_252480	-5.26329	0.222959		1
TGME49_252510	-0.721015	0.807593		2
TGME49_252630	-5.86515	7.03153e-06		6
TGME49_253290	-0.4775	0.55606	20	20
TGME49_253430	-1.12424	0.0189421	12	17
TGME49_253650	-3.39056	0.791297		3
TGME49_253700	-0.0387112	1		1
TGME49_253730	-0.583464	0.574046	3	8
TGME49_253740	-2.50082	0.0246342		3
TGME49_253750	0.869475	0.363356	1	1
TGME49_253800	-1.66156	0.0291005		4
TGME49_254030	-6.52553	4.78856e-09	1	5
TGME49_254050	-1.70728	0.222959		1
TGME49_254135	-2.74547	0.0133826		3
TGME49_254230	-3.0392	0.004719		4
TGME49_254260	-0.0146391	1		1
TGME49_254365	-0.721877	0.564918		1
TGME49_254400	-2.93654	0.104271		3
TGME49_254410	-3.09939	7.42252e-06		7
TGME49_254440	-0.413538	0.932415	2	3
TGME49_254530	-2.10264	0.00293899		4
TGME49_254580	-1.82067	1	1	1
TGME49_254620	1.52815	0.0551494	2	1
TGME49_254690	-1.11702	0.357788		2
TGME49_254800	-2.51264	0.068888		4
TGME49_254810	-2.21916	1.27817e-06		10
TGME49_254880	-1.63666	0.564918		1
TGME49_254920	-1.66634	0.0546772		3
TGME49_255060	-5.11109	0.222959		1
TGME49_255170	-3.32054	0.00184394	1	5
TGME49_255190	-0.76025	0.439342	3	8
TGME49_255260	-5.96883	0.179908		2
TGME49_255350	-0.653	0.502276	2	2
TGME49_255400	-0.625648	1		1
TGME49_255420	-1.45595	0.177071	3	4
TGME49_255470	-0.703473	0.807593		2
TGME49_256000	-0.194676	0.417188	1	1
TGME49_256090	-0.270778	0.807593		1
TGME49_256760	-2.69516	0.665764	2	2
TGME49_256770	-1.37841	0.134229	7	10
TGME49_256810	0.270078	1		2
TGME49_256840	-2.87209	0.363356		1
TGME49_256970	-0.757976	0.295758	5	7
TGME49_256980	0.391964	0.807593	1	2
TGME49_256990	-2.17669	0.0154144	4	8
TGME49_257040	-1.43633	0.807593		1
TGME49_257340	-1.98436	0.138002		4
TGME49_257390	-1.71254	0.0086426		5
TGME49_257440	-4.28471	0.807593		1
TGME49_257480	-5.80274	4.19222e-21		19
TGME49_257530	-3.67211	0.222959		1
TGME49_257680	-0.839968	1	2	2
TGME49_257730	-4.15974	0.0244155		4
TGME49_257740	-2.32991	0.363356		1
TGME49_257800	-2.26045	0.0197478		2
TGME49_257960	0.517688	0.807593	1	1
TGME49_257990	-1.082	0.24064	4	9
TGME49_258000	-2.84237	8.22612e-10		13
TGME49_258050	-0.0841357	1	1	1
TGME49_258060	-3.6865	0.128067		2
TGME49_258070	-0.157024	0.541587	8	6
TGME49_258100	-4.21049	0.000288474		3
TGME49_258130	1.24065	1	1
TGME49_258240	-0.376532	0.807593	1	1
TGME49_258390	0.266226	1	1	1
TGME49_258540	-0.279113	1		1
TGME49_258580	-1.24035	0.000105481	10	13
TGME49_258630	-0.390235	1		1
TGME49_258650	-3.38902	2.95785e-09		11
TGME49_258690	-0.963994	0.128067		2
TGME49_258740	-0.0642889	0.222959	6	7
TGME49_258860	-0.659753	0.564918		1
TGME49_258870	-0.611706	0.892084	7	6
TGME49_258950	-6.15977	0.363356		1
TGME49_258970	-0.736702	0.564918		1
TGME49_259160	3.45374	0.222959	1
TGME49_259240	-1.12609	0.357788	1	2
TGME49_259260	-1.60168	0.177071		5
TGME49_259550	-2.02975	8.99341e-07	8	15
TGME49_259600	-3.30237	0.363356		1
TGME49_259660	-2.23592	0.0755626	3	6
TGME49_259710	-7.91691	3.17925e-14		12
TGME49_259850	-3.43431	0.000199173		5
TGME49_259950	-2.79448	1		1
TGME49_260010	-1.21415	0.564918	1	1
TGME49_260140	-1.33639	0.661924		2
TGME49_260170	-4.84188	9.2499e-17	1	24
TGME49_260180	-6.15205	3.26443e-06		8
TGME49_260200	0.549559	0.807593		1
TGME49_260210	-2.35612	0.00447562		2
TGME49_260230	-0.352704	1		2
TGME49_260240	-3.03732	0.564918		1
TGME49_260320	0.0568283	0.90995		2
TGME49_260340	-2.52888	0.222959		1
TGME49_260440	-1.66348	0.440824	2	2
TGME49_260450	-1.90743	1		1
TGME49_260470	-3.34794	0.363356		1
TGME49_260500	-2.02667	0.661924	1	2
TGME49_260540	-0.585599	1		1
TGME49_260630	-1.82681	0.0802382	2	4
TGME49_260660	-2.39513	0.0277283		5
TGME49_260790	-3.53247	0.000332859		7
TGME49_260820	-0.46902	1		1
TGME49_260840	-2.26635	0.00299996		3
TGME49_260990	-2.56746	0.222959		1
TGME49_261010	0.0737196	1	2	2
TGME49_261030	-4.36816	1.44831e-05		8
TGME49_261070	-1.17625	0.248649		3
TGME49_261210	-0.805225	0.223706	3	7
TGME49_261250	1.82883	0.222959	1	1
TGME49_261380	-0.569391	0.564918		1
TGME49_261460	-1.01537	0.417188	1	2
TGME49_261475	-1.7893	0.0186536		3
TGME49_261480	-2.60546	0.502276		2
TGME49_261510	-3.95926	0.00481058		4
TGME49_261570	-1.8109	0.0304626	11	12
TGME49_261580	-0.175674	1	1	1
TGME49_261600	-2.77768	6.80109e-07		10
TGME49_261950	-7.00322	6.11887e-41	7	30
TGME49_262000	-1.71002	0.222959		2
TGME49_262040	-0.993861	0.977484	7	7
TGME49_262050	-0.924511	0.457496	3	5
TGME49_262140	-0.649202	0.661924	1	1
TGME49_262380	-5.46044	2.44642e-21	8	24
TGME49_262460	2.66949	0.807593	1
TGME49_262520	-3.33015	0.363356		1
TGME49_262620	-0.861313	0.564918	7	9
TGME49_262640	-5.31724	5.04885e-11		7
TGME49_262670	-2.57959	0.00719587	6	9
TGME49_262690	-1.71061	0.0442579	5	6
TGME49_262710	-0.19974	0.807593		1
TGME49_262720	-0.506552	0.564918	1	1
TGME49_262730	-0.536008	1	2	2
TGME49_262810	-3.82238	0.0223139		2
TGME49_262960	2.81493	1.91325e-05	15	15
TGME49_263040	-2.35057	0.0547799	6	7
TGME49_263050	-0.744537	0.891031	10	9
TGME49_263060	-1.75916	0.222959		3
TGME49_263070	-2.31915	5.15694e-05	5	10
TGME49_263080	-3.4341	6.99705e-05		6
TGME49_263090	0.766229	0.493101	3	2
TGME49_263130	-1.77211	0.0853242	1	4
TGME49_263180	-0.0630336	0.815694	16	14
TGME49_263300	-1.12789	0.336221	15	12
TGME49_263320	0.36907	0.553336	7	8
TGME49_263400	-2.15236	0.222959		1
TGME49_263430	1.1028	0.807593	1	1
TGME49_263500	-4.09048	0.0501079	2	6
TGME49_263530	-9.31362	0.00022482	2	5
TGME49_263550	-0.794189	1		1
TGME49_263630	-2.55643	0.285282		3
TGME49_263680	-3.04445	0.222959		1
TGME49_263700	-1.68956	0.128067	7	8
TGME49_263730	-3.01381	1.03757e-07		8
TGME49_263740	-2.49465	0.000373126		5
TGME49_263750	-3.32618	0.000421687		10
TGME49_263760	-2.28237	1.796e-05		5
TGME49_263810	-3.67266	0.222959	1	2
TGME49_263840	-2.52572	3.91681e-05		7
TGME49_263850	-2.20308	0.313609	3	3
TGME49_263870	-0.424913	0.0164471	11	14
TGME49_264030	-2.11873	0.00118717		4
TGME49_264040	-6.9469	4.80503e-16		12
TGME49_264060	-1.64042	0.390591	1	5
TGME49_264080	-2.60198	0.222959		1
TGME49_264160	-2.29751	0.00839987	1	8
TGME49_264178	-1.62998	0.807593		1
TGME49_264440	-2.28735	0.0142943		5
TGME49_264450	-0.531442	1	1	4
TGME49_264600	0.422076	0.807593	1	1
TGME49_264730	-2.68987	0.0133826		3
TGME49_264830	0.930605	0.363356		1
TGME49_265010	0.972763	1		1
TGME49_265020	-0.448133	0.222959	1	1
TGME49_265220	-6.07832	3.48393e-14		10
TGME49_265230	-2.64533	0.222959		1
TGME49_265330	-0.0817631	0.807593	3	3
TGME49_265360	-4.78086	1.30667e-07	3	12
TGME49_265370	-4.74872	3.67776e-10		8
TGME49_265450	-0.391542	0.363356	3	6
TGME49_265470	-4.4867	0.00245013		5
TGME49_265520	-0.828009	0.46919	4	8
TGME49_265530	-0.254591	0.837583	2	2
TGME49_266060	-1.03167	0.092592	6	6
TGME49_266070	-1.06349	0.450109	3	4
TGME49_266080	-1.69055	0.328699		5
TGME49_266090	-2.57169	0.329287	1	3
TGME49_266110	-1.49356	1.86908e-05		10
TGME49_266120	-1.50665	0.179908		2
TGME49_266260	-2.27856	0.00412081		4
TGME49_266470	0.0855391	0.363356		1
TGME49_266640	-2.3314	0.000178811	9	20
TGME49_266760	-1.42878	0.00608658	2	4
TGME49_266800	-0.939192	0.564918		1
TGME49_266840	-2.49814	0.064053	1	3
TGME49_266850	-3.18589	7.88643e-06		7
TGME49_266960	-0.790144	0.837213	6	5
TGME49_266990	-2.75756	0.00339084	9	23
TGME49_267040	-3.96675	0.000633574		5
TGME49_267060	-0.669637	1	1
TGME49_267080	-1.91421	0.128067	2	6
TGME49_267330	-5.46326	2.11293e-25	5	28
TGME49_267400	-1.19627	0.222959	5	6
TGME49_267480	-1.05589	0.661924	1	2
TGME49_267560	-3.46885	3.7377e-18		25
TGME49_267620	0.75249	0.564918	1	1
TGME49_267775	-2.53431	6.42761e-08		6
TGME49_267800	-2.69016	0.807593	1	1
TGME49_267810	-2.61072	0.147732	3	5
TGME49_267970	-1.30389	0.128067		2
TGME49_268200	-0.458401	0.430705	5	6
TGME49_268260	-3.881	4.68139e-12		14
TGME49_268290	-2.18897	2.25507e-06		8
TGME49_268370	-0.926041	0.929945	1	3
TGME49_268570	-0.510238	1		1
TGME49_268650	-4.05036	6.01894e-19	2	25
TGME49_268730	-3.26833	0.0107597		2
TGME49_268830	-5.87667	3.52377e-18		22
TGME49_268850	-0.456695	0.417188	11	13
TGME49_268870	-0.108426	0.837583		3
TGME49_268890	-5.16106	1.32678e-15	6	17
TGME49_268950	0.251544	0.665764		2
TGME49_269000	-2.88949	0.000122004		4
TGME49_269180	-1.87712	0.606608		3
TGME49_269190	-1.57601	0.0902746	6	9
TGME49_269200	-0.222813	0.90995	1	1
TGME49_269290	-0.034761	0.502276		2
TGME49_269430	-0.800716	0.417459		3
TGME49_269480	0.619704	1		1
TGME49_269600	-0.142721	0.90995		2
TGME49_269800	-2.06431	0.430553	1	4
TGME49_269830	-1.13443	0.775661		2
TGME49_269840	-2.99777	0.661924		2
TGME49_269885	-0.0699752	0.580879	9	8
TGME49_269920	-1.06556	0.807593		2
TGME49_269980	-1.48794	0.239765	7	8
TGME49_270090	-1.64421	0.0402636		4
TGME49_270120	-5.04596	0.000519849		4
TGME49_270150	-2.53658	5.37104e-11	2	22
TGME49_270240	1.9883	0.440824	3	1
TGME49_270270	-1.98085	0.128067	1	1
TGME49_270310	-0.983429	0.807593		1
TGME49_270370	-1.13946	1	1	1
TGME49_270380	-0.558852	0.951442	4	4
TGME49_270510	-1.09705	0.186394	19	21
TGME49_270550	-0.439305	0.486604	2	3
TGME49_270800	-2.9733	7.79824e-07	1	10
TGME49_270865	-0.0582931	0.90995		2
TGME49_270960	0.640893	0.807593	1
TGME49_271050	0.447286	0.90995	1	1
TGME49_271110	-3.26177	0.000265693		7
TGME49_271240	-2.23255	0.0196997		5
TGME49_271350	-1.69808	0.553673		5
TGME49_271440	-1.17816	0.807593		1
TGME49_271470	-3.16989	0.564918		1
TGME49_271820	-4.5063	2.17176e-15	2	14
TGME49_271840	-0.90419	0.564918		1
TGME49_271888	-2.69217	0.0216876	3	6
TGME49_271930	1.61017	0.222959	1
TGME49_271970	-0.223592	0.904155	3	3
TGME49_272010	-1.07719	0.807593		1
TGME49_272030	0.615042	0.564918		1
TGME49_272210	-3.92855	0.222959		1
TGME49_272230	-4.24361	0.000421687		7
TGME49_272290	-2.02587	0.679068	2	6
TGME49_272490	-3.70382	5.75271e-13		14
TGME49_272530	-1.08484	1		1
TGME49_272640	-0.00266524	1		1
TGME49_272660	-1.55419	0.564918	1	1
TGME49_272670	-2.92838	1.24985e-07	1	18
TGME49_272910	-0.527157	1	14	15
TGME49_273090	-1.1983	0.0439424	8	13
TGME49_273100	-2.59361	0.179908		2
TGME49_273370	-1.62483	0.807593	1	3
TGME49_273445	-3.81955	0.363356		1
TGME49_273460	-0.325993	0.564918	17	18
TGME49_273520	-1.65206	0.0359698	5	11
TGME49_273560	-0.104139	0.807593	1
TGME49_273630	-3.16241	0.00447562		3
TGME49_273760	-1.12181	0.00321033	23	26
TGME49_273840	-0.324808	1	1	1
TGME49_273870	-1.82331	0.0248162		5
TGME49_273885	-3.50384	1.22868e-09		15
TGME49_273930	-4.32559	1.25984e-06		4
TGME49_273950	-0.0237765	0.837583	1	2
TGME49_273960	-4.22179	0.807593		2
TGME49_274060	-2.9235	9.90729e-10	9	16
TGME49_274110	4.225	0.363356	1
TGME49_274190	-0.813492	0.553673	2	4
TGME49_275650	-1.00727	0.440824	1	3
TGME49_275690	-0.996175	0.891031	8	9
TGME49_275802	-0.364999	0.905437	3	3
TGME49_275810	0.395485	0.417188	2	2
TGME49_275860	-1.04341	0.222959		1
TGME49_276140	-0.733525	0.561543	5	6
TGME49_276170	-0.644243	0.206748		4
TGME49_276210	-2.7851	5.2048e-06		8
TGME49_276890	-0.505642	0.661924	1	2
TGME49_276930	0.256564	0.807593	1
TGME49_277000	-0.72048	0.365011	5	8
TGME49_277090	-2.44714	0.564918		1
TGME49_277240	-0.220187	0.791297	2	2
TGME49_277270	1.03905	0.448507	7	5
TGME49_277490	-3.04973	0.222959		1
TGME49_277500	-3.58771	0.138002		4
TGME49_277690	-0.905111	0.179908		2
TGME49_277700	-2.08048	0.0419177		3
TGME49_277720	-6.08001	0.222959		1
TGME49_277760	-1.02743	0.775661	1	2
TGME49_277840	-0.419429	1		1
TGME49_277970	0.178002	0.807593	1	1
TGME49_278220	-3.21591	0.357788		2
TGME49_278250	-3.42563	6.05511e-06		11
TGME49_278550	-1.25868	0.068888		3
TGME49_278660	-3.10051	0.068888		3
TGME49_278720	-4.76641	9.40283e-08	1	12
TGME49_278830	-0.0626711	0.567205	16	18
TGME49_278870	-1.37815	0.142102	19	37
TGME49_278960	-1.16279	0.807593		1
TGME49_278990	-6.31193	5.41466e-20	7	16
TGME49_279100	-0.940199	0.541587	4	6
TGME49_279330	-0.754137	0.90995	1	1
TGME49_279380	-1.99727	0.363356		1
TGME49_279390	-0.867281	0.290964	8	9
TGME49_280370	-1.12422	0.363356	6	6
TGME49_280380	-0.408941	0.807593	1
TGME49_280490	-0.653048	0.885263	2	3
TGME49_280560	-0.552015	0.679068		6
TGME49_280600	-2.23903	1.17139e-05	7	19
TGME49_280610	-0.594996	0.975155	3	5
TGME49_280660	-1.51534	0.502276		2
TGME49_280700	-2.64446	0.807593		1
TGME49_280730	-2.3228	0.807593		1
TGME49_281370	-2.2179	0.128067		2
TGME49_281620	-2.13026	0.179908		2
TGME49_281630	-3.44962	0.000337313		5
TGME49_281980	-1.33204	0.279812		2
TGME49_282040	-2.947	3.39727e-05		14
TGME49_282180	-6.2392	2.28236e-08		7
TGME49_283510	-0.374633	0.564918		2
TGME49_283720	-1.50244	0.363356		1
TGME49_283820	-1.34721	0.104271		3
TGME49_283830	-4.92399	4.88383e-12		12
TGME49_283850	-1.69782	0.173715	2	4
TGME49_284010	-0.506205	0.564918		1
TGME49_284040	-2.0506	3.08496e-05		10
TGME49_284050	-0.500813	0.807593	1	2
TGME49_284190	0.264038	0.00577516	52	55
TGME49_284540	-6.26755	8.47328e-16		11
TGME49_284560	-1.74986	0.0048586	5	8
TGME49_285170	-1.84816	0.00664277		3
TGME49_285240	-2.72936	0.128067	1	1
TGME49_285272	-3.33636	0.179571		3
TGME49_285510	-1.44927	0.279812		2
TGME49_285680	-2.47956	0.0210092		4
TGME49_285750	-3.88	7.88643e-06		4
TGME49_285830	-5.14436	0.222959		1
TGME49_285840	-4.73202	8.71859e-07		9
TGME49_285850	-0.465965	1	2	3
TGME49_285970	-4.38226	3.91681e-05	1	8
TGME49_285980	-0.765258	0.184747	13	16
TGME49_286120	-4.51238	2.27085e-08	1	9
TGME49_286260	-2.86951	6.95659e-06		7
TGME49_286410	-1.60935	0.000165371		11
TGME49_286440	-2.15582	0.807593		1
TGME49_286530	-5.25694	8.07597e-10		5
TGME49_286580	-2.05253	0.00218338	5	16
TGME49_286630	-1.19017	0.222814	4	6
TGME49_286650	-1.7132	0.00447562		3
TGME49_286720	-0.1191	0.363356	6	7
TGME49_287180	0.0104975	0.90995		2
TGME49_287500	-2.28676	0.0109819	16	24
TGME49_288280	0.618637	1		1
TGME49_288320	-0.878715	0.606608	1	2
TGME49_288360	-0.125263	0.991496	9	9
TGME49_288380	-1.45589	0.000795184	24	33
TGME49_288400	-5.14461	1.3673e-30		36
TGME49_288500	-6.54115	1.29276e-24	13	24
TGME49_288530	-0.324571	0.974831	2	3
TGME49_288630	-1.13881	0.279812		2
TGME49_288650	0.293285	0.285282	9	11
TGME49_288685	-3.51406	0.000785237		5
TGME49_288710	-3.88895	2.21235e-10		8
TGME49_288720	-1.11391	0.363356	8	10
TGME49_288750	-4.45772	3.26264e-07	1	7
TGME49_288830	-4.94037	2.30503e-27	16	30
TGME49_288860	0.480241	0.997955	4	5
TGME49_288990	-2.5308	0.0344148		4
TGME49_289080	1.13187	0.279812		2
TGME49_289140	-1.98773	0.153879		4
TGME49_289300	-1.68259	0.000500095	10	20
TGME49_289310	-0.499678	0.747836	3	5
TGME49_289330	-1.31999	0.0931164	2	8
TGME49_289530	-3.05482	0.0455274	2	5
TGME49_289600	-1.04156	0.179908	1	2
TGME49_289650	-2.85328	1.82659e-06	11	19
TGME49_289680	-0.971598	1		1
TGME49_289690	-0.0850431	0.775661	17	18
TGME49_289750	-1.20076	0.807593	1	1
TGME49_289760	-1.2534	0.693305	1	3
TGME49_289770	-1.59797	0.0975989	2	6
TGME49_289780	-3.50884	9.30169e-09		13
TGME49_289800	0.262935	0.909672	4	5
TGME49_289830	-1.99425	0.200181	4	9
TGME49_289960	-1.53024	0.807593		1
TGME49_289970	0.755323	0.0894608	2	2
TGME49_290030	-6.60576	4.84135e-07	1	10
TGME49_290160	-2.83261	0.363356		1
TGME49_290170	-1.41136	0.807593	1
TGME49_290180	-1.57736	0.179908		2
TGME49_290200	-1.6044	0.194956	4	8
TGME49_290290	1.18277	0.357788	2	1
TGME49_290460	-2.58653	1.30286e-05		5
TGME49_290600	-6.6177	1.12461e-21	1	15
TGME49_290650	-1.66782	0.0113456		5
TGME49_290660	-0.323963	1	2	2
TGME49_290670	-1.73216	6.92869e-05	24	28
TGME49_290720	-0.992826	0.807593		1
TGME49_290730	-1.47299	0.417188		2
TGME49_290840	-5.48656	6.19476e-17	2	17
TGME49_290880	-1.61703	0.417188		2
TGME49_290890	-1.59876	0.000318926		3
TGME49_290900	-3.36688	0.0419177		3
TGME49_290950	-0.874387	0.197201	26	40
TGME49_290970	-0.544835	1		1
TGME49_290980	-0.676683	0.222959		1
TGME49_291140	-1.58547	0.08368	1	4
TGME49_291180	-1.86634	0.108065	2	12
TGME49_291350	-3.33321	2.85148e-08		9
TGME49_291670	-3.53431	0.363356		1
TGME49_291680	-1.3166	0.0426954	5	12
TGME49_291800	-0.376232	1		1
TGME49_291820	-1.17524	1		1
TGME49_291850	7.282	0.363356	1	1
TGME49_291880	-1.46156	0.222959	1
TGME49_291960	-0.519654	0.837583	2	3
TGME49_292000	-2.89235	0.564918		1
TGME49_292020	-2.72965	0.363356		1
TGME49_292035	-1.31752	0.00193967		8
TGME49_292080	-0.999957	1.45456e-05	19	24
TGME49_292130	-2.43801	0.000597515	9	9
TGME49_292190	-1.2936	0.279812		2
TGME49_292220	-0.954385	0.279812	6	9
TGME49_292245	0.412063	1		1
TGME49_292300	-3.86253	1.16397e-12		12
TGME49_292360	2.47779	0.363356	1
TGME49_292920	-7.32249	7.34519e-32	10	35
TGME49_292975	-3.14733	8.51326e-16		21
TGME49_293000	-0.261097	0.807593	1
TGME49_293180	-1.75998	0.0107597	2	7
TGME49_293330	-2.95246	4.42669e-08		16
TGME49_293350	-2.96893	0.00143882		7
TGME49_293390	-2.38723	0.153879		4
TGME49_293480	1.31729	0.564918	1
TGME49_293510	-2.38082	0.0172146	1	3
TGME49_293570	-1.85604	0.502276	1	2
TGME49_293590	-0.347554	0.848925	5	9
TGME49_293690	1.11685	0.90995	1	1
TGME49_293730	-1.17135	0.564918		1
TGME49_293860	-2.511	0.807593		1
TGME49_293870	-6.66115	0.564918		1
TGME49_294040	0.0705169	0.807593	1	1
TGME49_294190	-1.81264	0.0095026	1	5
TGME49_294200	0.213538	0.564918	21	20
TGME49_294250	-2.08401	0.363356		1
TGME49_294350	-1.28785	0.179908		2
TGME49_294360	-0.198808	0.807593		1
TGME49_294550	-0.987247	0.186206	1	4
TGME49_294620	-1.63931	0.147156	12	15
TGME49_294670	-1.50681	0.450109	2	4
TGME49_294750	-0.509293	0.357788		2
TGME49_294770	-0.540238	0.807593		4
TGME49_294800	-1.09162	0.000139519	16	15
TGME49_294812	-2.13541	0.222959		1
TGME49_294902	-1.92596	0.661924		2
TGME49_295080	-1.25516	0.807593		1
TGME49_295110	2.42091	0.0051357	8	3
TGME49_295125	1.98052	0.0344148	4	2
TGME49_295370	-3.94698	0.000589346		3
TGME49_295380	-1.48761	4.73472e-07		16
TGME49_295590	-2.18032	0.0230018		6
TGME49_295690	-3.05207	1.42777e-09		8
TGME49_295710	-1.6871	0.564918		1
TGME49_296010	-0.797503	1		1
TGME49_297100	-1.90085	0.222959		1
TGME49_297160	-5.079	6.69264e-06		6
TGME49_297430	2.89588	0.363356	1
TGME49_297470	-0.190636	0.328699	5	5
TGME49_297500	-0.0367142	0.564918	8	7
TGME49_297650	-1.76344	0.222959		1
TGME49_297720	-3.04571	0.0580971	1	6
TGME49_297745	-0.750285	0.574046	2	2
TGME49_297810	-6.38159	1.33402e-16		10
TGME49_297845	-1.4746	0.564918		1
TGME49_297890	-2.55379	7.78278e-09		11
TGME49_297925	-2.09039	0.807593		1
TGME49_297970	-2.22561	0.0115259		5
TGME49_298020	0.88757	0.222959	2	1
TGME49_298030	-2.83477	4.51408e-05		6
TGME49_298610	-2.53162	0.807593		1
TGME49_298630	0.115206	1		1
TGME49_299050	-0.0494663	0.457496	5	3
TGME49_299060	-0.746222	0.807593	1	1
TGME49_299070	-6.61682	1.7995e-33	2	31
TGME49_299110	-0.765185	0.212514	4	7
TGME49_299210	-1.32745	0.603282	8	10
TGME49_299780	-1.07678	0.951442	1	2
TGME49_299810	-2.1467	0.000265693		4
TGME49_299900	-2.65307	0.064053		4
TGME49_300000	-1.41306	0.0244155	7	8
TGME49_300020	-1.88154	0.0551494	1	3
TGME49_300030	-2.94654	3.10602e-08		14
TGME49_300060	-1.62351	0.440824	1	2
TGME49_300100	-2.08686	0.0894608	5	11
TGME49_300120	-1.75181	0.363356		1
TGME49_300140	-1.06572	0.222959	10	12
TGME49_300190	-1.90746	0.222959		2
TGME49_300260	-2.50692	0.000787065	7	17
TGME49_300310	-2.10885	0.450109	1	3
TGME49_300621	-0.823794	0.807593		1
TGME49_300690	0.30306	1		1
TGME49_301120	-3.34556	4.34343e-12	4	16
TGME49_301380	-3.06045	0.222959		1
TGME49_301440	-1.72898	0.564918	1	1
TGME49_302000	-2.68786	0.222959		1
TGME49_302050	-1.46994	0.541587	4	8
TGME49_304640	-4.27877	3.17925e-14		24
TGME49_304660	-2.51278	0.564918		1
TGME49_304710	0.453986	0.573076	9	6
TGME49_304740	-1.07751	0.692629	3	5
TGME49_304760	0.272747	1		1
TGME49_304910	-1.59503	0.363356		1
TGME49_304955	-1.05894	0.0197478		2
TGME49_304990	-1.25289	0.0823078	1	6
TGME49_305040	-0.54331	0.502276		2
TGME49_305120	-2.15984	0.222959		1
TGME49_305290	0.20292	0.807593	1	1
TGME49_305340	-1.28079	0.283392	1	5
TGME49_305450	-1.24212	0.179908	1	2
TGME49_305510	-1.37924	0.807593	1	3
TGME49_305520	-1.2145	0.00129949	9	11
TGME49_305780	-0.958452	0.502276	1	1
TGME49_305810	-0.158741	1		1
TGME49_305820	-0.631893	0.807593		1
TGME49_305850	-0.932099	0.410864	7	8
TGME49_305860	-0.880826	0.807593	1	1
TGME49_305980	-1.98161	0.665764	1	2
TGME49_306030	-0.10595	0.0902746	7	7
TGME49_306060	-0.747632	0.727574	6	6
TGME49_306210	-1.53904	0.417188		2
TGME49_306400	1.15863	0.564918	1
TGME49_306600	0.970233	0.222959	1
TGME49_306650	-6.09436	1.92635e-14		9
TGME49_306670	-7.53501	2.01093e-17		8
TGME49_306950	0.053157	0.90995		2
TGME49_306960	-1.40547	0.21535	4	11
TGME49_306970	-2.96873	0.000151857	2	6
TGME49_307040	-0.630077	0.791297	1	2
TGME49_307570	-4.90617	0.0419177		3
TGME49_307810	-1.14744	0.285282	1	3
TGME49_307850	-0.821904	0.915329	6	7
TGME49_308000	-0.339405	0.90995	1	2
TGME49_308030	-1.91301	0.279812		2
TGME49_308090	-0.0454126	0.807593	8	11
TGME49_308580	-3.53025	9.94195e-11	1	24
TGME49_308840	0.21385	0.564918		1
TGME49_308860	1.33783	0.222959	2	1
TGME49_308890	0.0995839	0.564918	1	2
TGME49_308920	0.495248	0.0968036	5	6
TGME49_308970	-0.172142	1	1
TGME49_309010	-3.14134	0.00118717		4
TGME49_309120	-0.916113	0.00162964	15	17
TGME49_309140	0.87001	0.90995		2
TGME49_309210	-2.31394	0.450109	3	3
TGME49_309265	-0.992944	1	2	2
TGME49_309290	-2.34083	0.222959		1
TGME49_309370	1.30688	0.564918		1
TGME49_309390	-2.1193	0.222959		1
TGME49_309560	-1.41608	0.0353067		2
TGME49_309570	0.0345031	0.90995	1	2
TGME49_309590	-4.44184	0.179908	1	2
TGME49_309600	-1.15613	0.351823	5	8
TGME49_309730	-4.33369	4.7577e-14	1	16
TGME49_309752	-5.39004	1.47878e-21	15	22
TGME49_309760	-1.28287	1	1
TGME49_309790	-2.72221	0.222959		1
TGME49_309820	-0.631467	0.443946	6	7
TGME49_310030	-2.23421	0.00689676	3	7
TGME49_310118	-3.00236	3.52249e-05	2	7
TGME49_310180	-4.95942	0.363356		1
TGME49_310200	-1.61672	0.00299996		2
TGME49_310210	-2.21777	1		1
TGME49_310290	-1.31417	0.0551494		4
TGME49_310300	-3.60509	3.23712e-09	1	11
TGME49_310320	3.0681	0.564918	1
TGME49_310360	-4.10597	0.00293899		4
TGME49_310370	0.0852701	1		1
TGME49_310430	-3.83147	0.363356	1	8
TGME49_310440	4.11382	0.807593		1
TGME49_310460	-1.14953	0.417459	3	4
TGME49_310470	-4.37192	0.00300188		3
TGME49_310490	-2.88181	0.807593	2	3
TGME49_310500	-1.80746	0.0855658		3
TGME49_310640	-1.49816	0.104271	5	6
TGME49_310670	-1.77466	0.62381	3	7
TGME49_310700	0.239581	1	3	1
TGME49_310710	-0.879736	0.153879		4
TGME49_310750	-2.50682	0.0999645	4	8
TGME49_310760	0.0813655	1	1	1
TGME49_310770	-1.72393	0.564918		1
TGME49_310780	-1.59889	0.775661		2
TGME49_310860	-0.49084	0.90995	1	1
TGME49_311030	-0.301347	1	1	2
TGME49_311090	-0.404612	0.837583	2	2
TGME49_311110	0.227719	1		1
TGME49_311150	-3.42432	8.99449e-07		7
TGME49_311230	2.19027	0.248649	3	1
TGME49_311290	0.519783	0.807593	2	3
TGME49_311310	-1.35187	0.363356	2	4
TGME49_311360	-0.743529	0.72419	2	4
TGME49_311400	-1.78476	0.807593		1
TGME49_311430	-1.34453	0.0478179	10	12
TGME49_311470	-0.82433	0.186206	10	13
TGME49_311480	-2.21514	0.807593		1
TGME49_311680	-1.67729	0.119269	1	4
TGME49_311720	-1.71852	0.000264817	22	25
TGME49_311840	-0.305464	1		1
TGME49_311890	-1.18078	0.206748	2	4
TGME49_312050	-2.56082	0.186206	1	7
TGME49_312090	-0.95173	0.173302	5	7
TGME49_312100	0.179121	0.775661	2	2
TGME49_312110	-3.02953	0.328669	1	4
TGME49_312160	-5.78299	2.76978e-06		5
TGME49_312200	-0.554831	0.90995	2	2
TGME49_312220	-3.94997	0.0107597		2
TGME49_312270	-0.329836	0.417459	3	3
TGME49_312280	-0.3863	0.807593		1
TGME49_312390	-2.39863	0.222959		1
TGME49_312430	-1.47747	0.186206	1	4
TGME49_312480	0.0362125	0.685651	5	6
TGME49_312530	-0.23554	1	1	1
TGME49_312600	-1.45119	0.807593	1	1
TGME49_312622	-1.22388	0.775661		2
TGME49_312630	-0.597523	0.719742	25	27
TGME49_312990	-1.08944	0.564918	2	4
TGME49_313010	-1.60161	0.0201889	11	16
TGME49_313070	-3.4645	0.000206437		5
TGME49_313080	6.74115	0.807593	1
TGME49_313100	-1.14551	0.36653	2	5
TGME49_313140	-8.12753	1.52686e-31	9	28
TGME49_313190	-1.96825	1		1
TGME49_313230	-1.10598	0.271485	4	7
TGME49_313240	-5.02975	1.53063e-20	1	25
TGME49_313270	-2.1367	0.222959		1
TGME49_313370	-0.199572	0.363356		7
TGME49_313390	-2.97815	0.0056449	10	13
TGME49_313400	-1.3697	0.807593		1
TGME49_313410	-1.1883	0.271485	1	6
TGME49_313495	1.07978	0.564918	1
TGME49_313560	1.54559	0.564918	1
TGME49_313670	-1.8967	0.138426	5	10
TGME49_313700	-2.43606	0.285282		3
TGME49_313770	-3.59649	5.39597e-17		22
TGME49_313910	-1.95594	0.417188		2
TGME49_313960	-3.96235	0.000587221		6
TGME49_313970	-2.17227	0.357788		2
TGME49_313990	-2.96332	0.222959		1
TGME49_314042	-0.604224	0.564918		1
TGME49_314080	-1.22477	1		1
TGME49_314100	-0.310005	0.468536	5	4
TGME49_314270	-0.962379	0.138002	1	4
TGME49_314295	-2.14338	0.00664277		2
TGME49_314320	1.1051	0.807593	1
TGME49_314400	-5.25584	1.12466e-10	7	11
TGME49_314422	-2.57637	0.502276		2
TGME49_314680	-4.06924	0.222959		1
TGME49_314690	-3.03198	7.83737e-05		5
TGME49_314710	-1.18697	0.417188		2
TGME49_314780	-0.78025	1		1
TGME49_314810	-0.11083	0.564918	8	8
TGME49_314820	-3.64746	0.0353067		2
TGME49_314955	-0.6346	0.564918		1
TGME49_314970	-1.33577	0.443975	6	11
TGME49_315150	-1.23911	0.564918		1
TGME49_315210	-1.31497	0.398703	1	2
TGME49_315220	-1.16402	0.679068	3	6
TGME49_315230	-2.36066	0.000633574		5
TGME49_315250	2.16258	0.363356	1
TGME49_315460	-1.70153	0.222959		1
TGME49_315610	0.436903	0.486604	3	2
TGME49_315620	0.0822337	1	5	6
TGME49_315770	-1.9631	7.28912e-05	2	9
TGME49_315810	-1.57328	0.279812		2
TGME49_315930	-6.77992	7.88643e-06	1	3
TGME49_315940	-0.928116	0.417188		2
TGME49_315958	-1.59693	0.564918		1
TGME49_316140	-1.32668	0.00839987	4	6
TGME49_316255	-3.86075	0.00232389		3
TGME49_316330	-6.74025	5.08204e-08		8
TGME49_316340	2.89586	0.363356	1
TGME49_316400	-0.32932	1	10	11
TGME49_316540	-2.20572	0.0546772		3
TGME49_316570	-1.19414	0.00142668		5
TGME49_316610	-1.98012	0.00106415		6
TGME49_317720	-0.338398	1	6	7
TGME49_318170	-3.12428	3.38832e-05		4
TGME49_318230	-0.854711	0.451715	3	4
TGME49_318400	-3.28686	4.60492e-05	1	10
TGME49_318410	-1.45483	0.0410056	5	17
TGME49_318430	-5.16901	1.56129e-19		12
TGME49_318440	-1.00525	0.190576	15	27
TGME49_318510	0.222335	0.439342	6	7
TGME49_318560	-3.26508	7.60493e-10	3	12
TGME49_318580	-0.333079	0.807593	2	3
TGME49_318710	-0.579207	0.59186	6	9
TGME49_318720	-1.19719	0.807593		1
TGME49_319340	0.847054	0.417188	1	1
TGME49_319530	-1.30042	0.807593		1
TGME49_319540	-3.40786	0.001723		5
TGME49_319550	-1.96326	0.398703	2	3
TGME49_319560	-2.38696	1		1
TGME49_319850	-0.203846	1	5	6
TGME49_319920	-6.30818	3.38125e-18	6	18
TGME49_320015	-2.51033	0.222959		2
TGME49_320020	-2.2882	0.00189655	4	8
TGME49_320050	-1.43364	0.00428197	12	16
TGME49_320100	-0.221605	0.564918		2
TGME49_320140	-4.33739	0.0086426		4
TGME49_320220	-4.59606	1.49178e-13	1	13
TGME49_320300	1.01665	0.807593		1
TGME49_320480	-1.37793	0.0894608	4	7
TGME49_320570	-0.819872	0.606608	2	2
TGME49_320592	-2.40471	2.49418e-09		15
TGME49_320600	-1.55957	0.564918		1
TGME49_320700	-1.35136	0.179908		2
TGME49_321370	-3.17144	0.000318926		6
TGME49_321400	-1.24293	0.128067		3
TGME49_321500	-0.444607	0.457496	5	7
TGME49_321520	-2.10832	0.363356		1
TGME49_321590	-0.624831	0.329287	2	3
TGME49_321620	6.2577	0.363356	1
TGME49_321640	-4.03002	0.564918		1
TGME49_322210	-7.15415	0.222959		1
TGME49_323100	0.0366985	0.807593	1	1

## Sheet: 3. mitoBirA proteome raw
AccessionNumber	Log2 Protein Ratio RH control vs mitoBirA	Protein PValue RH control vs mitoBirA	Sequence Count Unique - RH control	Sequence Count Unique - mitoBirA
TGME49_200310	-4.77445	0.135748		1
TGME49_200320	-4.05934	0.166054		1
TGME49_200460	-2.75454	0.0013358		4
TGME49_201120	-1.1922	0.166054		1
TGME49_201150	0.385859	1	1
TGME49_201210	-0.624461	1		1
TGME49_201270	5.13198	0.347275	2
TGME49_201380	-3.60886	8.11509e-07	2	8
TGME49_201400	-3.18639	4.41691e-08		8
TGME49_201680	-0.486612	0.000826268	36	37
TGME49_201700	-1.06948	0.0552269	6	6
TGME49_201780	0.761074	0.352591	9	7
TGME49_201800	-3.93684	1.07101e-08		6
TGME49_201840	2.31763	0.514841	1
TGME49_201880	-4.80203	0.000101768		3
TGME49_202190	0.240939	0.996454		2
TGME49_202200	-0.824591	1		1
TGME49_202240	-3.0658	7.32089e-12		14
TGME49_202350	-5.21722	4.42514e-14		9
TGME49_202370	0.618887	0.00327199	15	12
TGME49_202390	0.25263	0.166054	6	5
TGME49_202460	0.753286	0.295536	7	2
TGME49_202500	-1.20517	0.434427	1	1
TGME49_202510	0.496225	0.740085	2	1
TGME49_202530	0.37511	0.332745	9	8
TGME49_202540	-1.75931	0.0597119		2
TGME49_202630	-5.38496	9.42629e-37	1	26
TGME49_202640	1.76478	1		1
TGME49_202680	-5.16636	3.92803e-26	12	21
TGME49_202720	-3.78571	6.51045e-12		12
TGME49_202750	-0.280717	1		1
TGME49_202760	-0.345611	1	1
TGME49_202770	1.3016	0.00659519	7	5
TGME49_202870	0.229337	1		1
TGME49_202950	-0.843182	0.207519	4	2
TGME49_202960	-2.55124	0.0222155		2
TGME49_203020	-2.91852	0.000916248		4
TGME49_203060	-3.28067	0.0222155		2
TGME49_203160	0.626221	0.166054	1	1
TGME49_203220	-5.70926	5.72215e-50	4	48
TGME49_203240	-0.166431	0.310423	5	6
TGME49_203280	1.5872	0.295536	1
TGME49_203310	2.36416	0.166054	5	2
TGME49_203380	-2.64559	0.00799058		3
TGME49_203390	-2.72216	0.00281631	1	2
TGME49_203450	-2.74119	0.78233		1
TGME49_203490	-0.618607	0.347275	2	1
TGME49_203520	-4.66178	1.37992e-16		16
TGME49_203610	-0.33029	1		1
TGME49_203620	-3.22079	0.166054		1
TGME49_203630	0.0857007	0.358884	4	4
TGME49_203730	-2.88765	2.91226e-07	1	8
TGME49_203750	-0.254521	1	1
TGME49_203780	0.203553	0.78233		1
TGME49_203840	-1.92886	1.46448e-06		8
TGME49_203940	-3.41127	8.88442e-18		11
TGME49_203980	-1.55965	0.0151251		4
TGME49_203990	-0.648203	0.609822	2	2
TGME49_204020	-0.231289	0.794105	8	6
TGME49_204050	-0.486004	0.848483	3	4
TGME49_204080	-1.09033	0.166054	1
TGME49_204130	-2.10639	0.166054		1
TGME49_204350	1.03361	0.514841	1
TGME49_204370	1.80809	0.185833	2	2
TGME49_204400	-3.36856	1.83653e-14	14	19
TGME49_204410	-4.10123	1.85339e-09	1	8
TGME49_204480	-0.580005	0.376536	6	6
TGME49_204490	0.755592	0.514841	1	1
TGME49_204550	-4.45894	7.81995e-23		20
TGME49_205010	-2.91287	3.16802e-09	2	10
TGME49_205040	-2.93341	0.00643518		2
TGME49_205130	-0.848109	0.126717	3	3
TGME49_205190	-3.37337	0.166054		1
TGME49_205220	0.998108	0.452635	4	2
TGME49_205240	0.148962	0.725383	2	4
TGME49_205250	1.25348	0.295536	3	3
TGME49_205320	-3.18318	2.01558e-07		7
TGME49_205350	0.37978	0.29911	4	5
TGME49_205380	-1.27105	0.00148372	14	16
TGME49_205440	0.355949	0.455565	11	14
TGME49_205470	-0.439495	0.166054	20	20
TGME49_205510	0.269977	0.0222761	15	13
TGME49_205540	-1.99618	0.724889	1	2
TGME49_205558	-4.08587	0.000363924		5
TGME49_205570	0.495728	0.767732	4	1
TGME49_205580	-2.05279	7.10198e-08	1	5
TGME49_205680	-0.545069	0.78233	1	1
TGME49_205700	0.145674	0.421477	2	2
TGME49_205710	-2.22817	3.39609e-06	2	6
TGME49_205740	-3.84622	0.166054		1
TGME49_206470	-4.82922	1.67899e-16	11	20
TGME49_206480	-2.95891	0.166054	1	2
TGME49_206500	-3.06112	5.97343e-08		9
TGME49_206510	1.11529	0.0217285	9	4
TGME49_206540	-0.372039	0.78233	1
TGME49_206590	-2.45388	0.00275167	1	4
TGME49_206610	5.23101	6.65692e-19	23	6
TGME49_206670	-2.61654	0.0119741	1	2
TGME49_206690	2.48436	0.295536	1
TGME49_207040	0.931397	0.166054		1
TGME49_207060	-0.469514	0.0414258	2	2
TGME49_207120	-0.163536	0.78233		1
TGME49_207170	-6.85319	2.57049e-05		3
TGME49_207180	-6.7444	0.166054		1
TGME49_207370	-2.47704	0.090249		2
TGME49_207390	0.575088	0.996454	1	2
TGME49_207430	0.876331	0.205583	5	4
TGME49_207440	0.653488	0.090249	11	13
TGME49_207450	1.2764	0.0205871	3	2
TGME49_207460	2.32167	0.135121	6	2
TGME49_207620	-1.25085	9.64358e-08	15	17
TGME49_207640	-1.08134	0.352591	12	15
TGME49_207710	1.34308	0.421477	3	1
TGME49_207720	1.16105	0.996454	2	3
TGME49_207760	-3.82482	3.63117e-15		12
TGME49_207770	0.459591	0.633108	6	4
TGME49_207800	-4.2228	6.1065e-11		9
TGME49_207840	1.56906	0.00044427	5	2
TGME49_207940	-2.80105	0.0119741		2
TGME49_208030	-0.143201	0.78233	1	1
TGME49_208090	-3.19405	5.1388e-08		7
TGME49_208400	-5.38557	0.295536		1
TGME49_208530	-2.78789	0.00259565		3
TGME49_208560	-1.65087	0.514841	1	2
TGME49_208590	-2.10609	3.0719e-06	3	8
TGME49_208790	0.713359	0.024952	8	6
TGME49_208842	-3.13103	0.0365181	1	2
TGME49_209010	-1.88585	0.295536		1
TGME49_209020	-1.89091	0.0446676		3
TGME49_209030	0.785292	0.505659	18	18
TGME49_209100	-2.10061	0.090249		2
TGME49_209108	-0.599709	0.78233		1
TGME49_209150	0.63746	0.426461	9	5
TGME49_209160	-2.07894	0.00224633		4
TGME49_209210	-0.110057	0.78233	3	2
TGME49_209260	-8.8163	8.94935e-27		18
TGME49_209290	2.84542	0.0222155	2	1
TGME49_209420	-4.61239	3.90098e-10		5
TGME49_209450	-0.943034	0.166054		1
TGME49_209540	-3.03146	0.00259565	1	3
TGME49_209550	-0.851797	0.295536		1
TGME49_209580	-2.36352	6.73122e-06		4
TGME49_209600	1.00643	0.0024554	15	12
TGME49_209680	-3.4457	5.0534e-06		5
TGME49_209720	0.0908444	0.166054	3	2
TGME49_209800	-1.78255	0.135748		2
TGME49_209850	-0.246091	1	1	1
TGME49_209870	-3.62516	4.0915e-06		4
TGME49_209910	1.67777	0.78233	1
TGME49_209950	-4.03775	5.44493e-16		12
TGME49_209960	-1.14422	0.166054		1
TGME49_209985	-0.0345579	0.892807	1	1
TGME49_210230	-2.21223	0.0112723		3
TGME49_210370	1.95027	0.000666636	8	3
TGME49_210690	0.125999	0.783831	10	10
TGME49_210700	-4.85318	0.166054		1
TGME49_210730	-2.91056	1.90323e-13	6	13
TGME49_210750	-4.5965	2.28246e-17		15
TGME49_210778	1.39238	0.78233	1
TGME49_210790	-3.67834	9.06123e-08		6
TGME49_210840	0.895608	0.612865	2	1
TGME49_210980	-1.25285	0.514841		1
TGME49_211020	-3.49311	0.166054		1
TGME49_211030	-4.74488	0.295536		1
TGME49_211060	-5.05794	2.24617e-06		4
TGME49_211090	-2.12995	3.72659e-09	9	14
TGME49_211230	0.667197	0.514841	1
TGME49_211290	5.1292	0.295536	1
TGME49_211300	-1.15579	0.166054		2
TGME49_211410	-0.472904	0.142014	3	3
TGME49_211450	-2.14156	0.514841		1
TGME49_211670	1.94974	1.60179e-05	11	6
TGME49_211680	-3.16271	8.40391e-09	3	15
TGME49_211690	-3.10463	5.7074e-25	19	33
TGME49_211710	-3.45396	0.00259565		2
TGME49_211890	-3.04937	1		1
TGME49_212090	1.42788	1	1
TGME49_212130	3.63549	0.166054	1
TGME49_212220	-1.17881	0.166054		1
TGME49_212250	1.22159	0.00113216	13	10
TGME49_212260	-3.93116	1.95976e-08	1	8
TGME49_212290	1.36609	0.78233	1
TGME49_212300	1.60883	0.000433424	9	1
TGME49_212930	-4.16718	2.37655e-13	1	9
TGME49_212950	1.86165	0.166054	1
TGME49_213010	-4.96985	0.166054		1
TGME49_213069	-4.07669	0.166054		1
TGME49_213072	0.18376	1	2	1
TGME49_213300	0.874016	0.166054	1
TGME49_213310	-4.28365	7.66655e-21	2	22
TGME49_213350	0.255656	0.878355	5	5
TGME49_213420	-4.39008	7.81995e-23		12
TGME49_213600	-3.16932	4.0915e-06		3
TGME49_213670	1.11412	1		1
TGME49_213690	1.01127	0.514841	1
TGME49_213730	0.69502	0.78233	1
TGME49_213740	-0.0602839	1	1	1
TGME49_213770	0.297055	0.970888	7	5
TGME49_213810	-2.39448	0.000120926		4
TGME49_213870	-2.14552	0.295536		1
TGME49_213910	0.418516	0.166054	7	4
TGME49_213940	0.721703	0.295536		1
TGME49_214080	3.20153	0.166054	1
TGME49_214090	-0.851033	0.00118545	7	13
TGME49_214110	1.09714	0.724889	2	1
TGME49_214150	1.15647	0.11196	4	1
TGME49_214210	-1.70483	0.159914	2	3
TGME49_214250	-5.79092	5.32085e-07		3
TGME49_214260	-1.03719	0.514841		1
TGME49_214270	-2.13839	8.06678e-10	4	10
TGME49_214290	-0.954166	0.996454	1	1
TGME49_214320	-1.05982	0.996454	1	2
TGME49_214350	-3.34934	0.0266127		3
TGME49_214370	-4.31832	5.99224e-09	1	11
TGME49_214440	0.647442	0.505076	7	6
TGME49_214575	-1.44772	0.256587		3
TGME49_214750	-4.86597	0.00353719	4	8
TGME49_214770	-1.33078	0.0868929	2	3
TGME49_214790	-4.05744	1.69579e-07		4
TGME49_214840	-0.628607	0.78233		1
TGME49_214870	-2.92933	2.80589e-10		6
TGME49_214930	-2.53343	0.00791434	1	4
TGME49_215020	-3.75007	0.000148202		4
TGME49_215060	-1.07819	0.0578232	6	6
TGME49_215100	-0.210409	1	1
TGME49_215220	-5.95494	0.295536		1
TGME49_215230	-0.764112	0.78233		1
TGME49_215250	-4.31504	0.0152068		2
TGME49_215260	0.331366	0.904437	17	19
TGME49_215280	-6.35715	6.91342e-18		14
TGME49_215290	1.7325	0.00173331	4	1
TGME49_215350	-4.29465	5.63225e-13		6
TGME49_215370	-2.38009	0.000556167		3
TGME49_215430	-1.20078	0.071343	2	2
TGME49_215460	0.985529	0.00309273	5	6
TGME49_215470	-0.467416	0.740085	2	1
TGME49_215590	-6.54529	2.52473e-31	7	25
TGME49_215610	-4.09401	0.000160119		3
TGME49_215660	-2.45328	0.00259565		3
TGME49_215690	-1.39945	0.166054		1
TGME49_215710	-5.799	1.69274e-10	1	12
TGME49_215775	3.29418	0.00643518	2
TGME49_215785	-0.0675983	0.996454	2	1
TGME49_215910	1.97935	0.000474469	20	2
TGME49_215920	-1.8937	0.78233		1
TGME49_215940	0.568689	0.434427	2	2
TGME49_215980	1.20775	0.0567059	4
TGME49_216000	-2.38307	0.612865	1	2
TGME49_216010	-4.64173	4.0915e-06		4
TGME49_216020	-0.491754	0.166054		1
TGME49_216040	-4.55439	0.000176066		2
TGME49_216180	-3.33747	0.0266127	2	2
TGME49_216210	0.0512437	1	1
TGME49_216260	0.137944	0.248489	9	6
TGME49_216390	-1.34111	0.514841		1
TGME49_216480	-2.04003	0.421477	1	2
TGME49_216510	-1.30052	0.281382		2
TGME49_216530	-5.58107	2.39465e-10	1	8
TGME49_216590	0.293829	0.47454	11	10
TGME49_216600	-2.78616	7.46154e-07		8
TGME49_216620	1.95633	9.11974e-11	26	1
TGME49_216650	-3.61601	1.68524e-07	2	7
TGME49_216660	0.485043	0.434427	2	1
TGME49_216670	-3.68583	1.44612e-10	6	18
TGME49_216730	0.519209	1		1
TGME49_216760	-3.24398	0.295536		1
TGME49_216790	1.09878	0.000144462	20	16
TGME49_216810	-2.40974	0.0205871	1	2
TGME49_216860	1.56494	0.00804333	17	13
TGME49_216880	0.649044	0.173912	13	10
TGME49_216900	-4.24151	3.68968e-11		6
TGME49_216960	-0.7745	0.514841		1
TGME49_217010	-3.09153	0.0365181		2
TGME49_217020	-5.96859	3.60752e-20	1	17
TGME49_217030	-3.90646	0.166054		1
TGME49_217050	-3.11072	0.166054		1
TGME49_217460	0.212859	1	18	20
TGME49_217470	-1.97265	0.00259565		3
TGME49_217480	-3.98787	0.00643518		2
TGME49_217540	0.481051	0.0751907	4	4
TGME49_217570	-1.7592	1	2	1
TGME49_217600	-0.359694	0.0356355	10	7
TGME49_217680	1.99148	0.00911728	9	2
TGME49_217740	1.65921	0.0949746	7	3
TGME49_217760	-2.50312	0.00643518		2
TGME49_217820	1.65915	0.000189997	10	8
TGME49_217890	-4.3645	1.3159e-09	3	7
TGME49_218220	-0.0770096	0.915184	3	3
TGME49_218250	-2.24916	0.000294021		5
TGME49_218270	-0.846423	0.347275	1	2
TGME49_218280	1.67657	0.236918	9	8
TGME49_218300	-2.16729	6.61331e-05		4
TGME49_218410	-3.45364	0.090249	3	4
TGME49_218490	-2.01659	0.00173331		3
TGME49_218520	-0.118845	1	1
TGME49_218530	-3.22205	0.295536		1
TGME49_218540	0.978635	0.00242568	9	5
TGME49_218560	4.15608	1.51288e-75	115	67
TGME49_218590	-0.195997	0.166054	4	3
TGME49_218610	-0.67124	0.166054	3	4
TGME49_218720	-5.07143	3.51075e-15		15
TGME49_218790	-3.18963	1.53487e-18		10
TGME49_218820	0.701927	0.0353767	7	6
TGME49_218830	-1.78044	0.78233	1
TGME49_218840	-5.76337	9.74385e-53	5	47
TGME49_218940	-3.60253	0.000556167		3
TGME49_219140	-2.71628	0.000984813	1	4
TGME49_219200	-1.18391	0.740085		3
TGME49_219250	1.42397	0.557216	2	2
TGME49_219270	-0.754237	0.109766	3	4
TGME49_219280	0.742752	0.00127106	12	11
TGME49_219310	-3.54129	1.02076e-10		9
TGME49_219320	-1.1218	0.000151816	9	11
TGME49_219430	-3.74453	0.166054		1
TGME49_219440	1.07722	0.78233		1
TGME49_219485	-0.637313	0.166054		1
TGME49_219520	2.13407	0.0472757	7	5
TGME49_219540	-1.64122	7.13004e-12	22	28
TGME49_219550	-8.98986	4.72324e-43	2	23
TGME49_219590	-0.403131	0.768539	5	4
TGME49_219630	-1.73548	0.0017568	2	4
TGME49_219682	-5.7143	6.35445e-17	3	14
TGME49_219700	0.694281	0.347275	1	1
TGME49_219710	-2.44168	1.30949e-05		8
TGME49_219720	0.932175	0.0222155	5	3
TGME49_219750	-3.41293	0.0365181		2
TGME49_219760	-2.27496	0.166054		1
TGME49_219770	-2.55861	0.0119741		2
TGME49_219790	0.791362	0.00284817	8	6
TGME49_219800	0.978431	0.00153741	22	19
TGME49_219832	-1.51088	0.166054		1
TGME49_219850	-0.0403218	0.166917	26	27
TGME49_220090	-3.7231	0.166054		1
TGME49_220100	0.18785	0.915184	8	7
TGME49_220132	0.0928425	1		1
TGME49_220150	-1.40738	0.108956		3
TGME49_220200	0.327025	1		1
TGME49_220260	-0.00307137	0.996454	4	4
TGME49_220350	-6.00049	0.347275		2
TGME49_220400	0.605573	1	4	4
TGME49_220450	-2.05853	0.166054		1
TGME49_220480	-2.94121	0.166054		1
TGME49_220510	-2.59772	0.166054		1
TGME49_220600	-2.03726	0.295536		1
TGME49_220860	0.0336048	0.78233	11	9
TGME49_220930	1.06389	0.0556603	8	7
TGME49_220940	-3.88484	0.00390262		2
TGME49_220950	5.27985	0.295536	1
TGME49_221320	3.63414	1.40811e-125	147	138
TGME49_221380	0.180684	0.609516	5	6
TGME49_221430	-5.42134	8.9847e-08		5
TGME49_221510	-5.67089	5.3666e-06		6
TGME49_221522	0.73911	0.384728	12	10
TGME49_221590	-0.699148	0.0597119	1	1
TGME49_221600	-1.86083	0.514841		1
TGME49_221620	-0.080355	0.218205	2	2
TGME49_221670	-2.05861	0.00199972	2	5
TGME49_221690	0.278964	0.724889	1	1
TGME49_221940	0.341349	0.996454	3	2
TGME49_222000	1.10846	0.0217285	4	2
TGME49_222020	-1.00659	0.78233	1	1
TGME49_222100	-2.41085	0.295536		1
TGME49_222120	-1.80643	0.0365181		2
TGME49_222140	-5.67783	0.166054		1
TGME49_222210	-5.18985	4.62863e-20	1	15
TGME49_222270	-2.36377	0.166054		1
TGME49_222300	2.75564	2.49509e-06	11
TGME49_222360	-2.11854	0.135748	1	2
TGME49_222380	0.0511474	0.93308	20	17
TGME49_222410	0.0575187	0.78233	2	2
TGME49_222660	-3.53324	2.45537e-10	2	11
TGME49_222860	-0.20316	0.315311	13	9
TGME49_222900	-1.80782	0.00173331	1	4
TGME49_222910	-5.79377	4.23243e-24		17
TGME49_222952	-3.93152	1.95976e-08		5
TGME49_222990	-3.40177	4.0915e-06		4
TGME49_223000	-1.81341	0.135748	1	1
TGME49_223040	-2.98909	0.00173331		3
TGME49_223050	-2.83855	0.0414065	4	7
TGME49_223140	-0.920674	0.0292348	3	6
TGME49_223270	-3.54632	1.26318e-13		14
TGME49_223390	0.175002	0.723837	30	27
TGME49_223500	-4.31936	7.43492e-20	1	16
TGME49_223540	0.266703	0.922743	11	8
TGME49_223660	-3.60034	1.39658e-07		8
TGME49_223910	0.429412	0.794105	3	3
TGME49_223920	1.632	6.43388e-24	64	49
TGME49_223940	-3.4866	0.00169267	1	4
TGME49_223960	1.80954	0.434427	2
TGME49_223970	-1.35359	0.78233	1
TGME49_224060	1.66674	0.88474	4	2
TGME49_224090	-1.16431	0.0374878	3	5
TGME49_224220	1.32371	0.00259565	3	2
TGME49_224240	-1.26279	0.00040998	1	4
TGME49_224260	-1.49315	0.00609128	2	5
TGME49_224320	-1.71881	0.166054		1
TGME49_224350	-4.64367	8.37787e-31		29
TGME49_224490	-2.78705	0.000176066		3
TGME49_224590	-2.25668	0.135748		2
TGME49_224620	-0.586179	1	1	1
TGME49_224730	-3.63657	1.77677e-05		5
TGME49_224820	-2.82431	0.0119741		2
TGME49_224850	-1.10308	1	6	7
TGME49_224890	-0.280828	0.724889		2
TGME49_224910	-3.95145	3.02436e-05		4
TGME49_224980	-1.20745	1		1
TGME49_224990	-1.23385	0.166054		2
TGME49_225050	-4.44125	0.166054	1	3
TGME49_225060	-3.10405	0.514841		1
TGME49_225080	3.13751	0.000810464	5	2
TGME49_225125	-1.80258	0.266579	4	7
TGME49_225130	1.36607	0.78233		1
TGME49_225150	0.72225	0.090249	5	5
TGME49_225240	-4.58817	7.87587e-06		4
TGME49_225310	-0.47279	0.514841		1
TGME49_225380	-4.32952	4.5994e-15		12
TGME49_225470	-1.4673	0.281382		2
TGME49_225550	1.4641	0.140643	5	2
TGME49_225730	-5.49841	0.0222155		2
TGME49_225790	-1.79086	0.514841		1
TGME49_225850	1.59148	0.713318	5	4
TGME49_225910	-0.80542	1		1
TGME49_225930	-3.9441	0.295536		1
TGME49_225940	0.141013	0.256587	2	2
TGME49_225980	-2.18916	1.87042e-09		6
TGME49_225990	1.93209	0.414178	4
TGME49_226000	-2.44934	2.23503e-07		5
TGME49_226020	-0.539249	0.609822	2	2
TGME49_226030	-0.0586144	0.451922	4	4
TGME49_226060	1.49167	0.0837596	4	3
TGME49_226068	1.36535	0.0266127	2	1
TGME49_226080	0.110214	1		1
TGME49_226090	-1.63818	0.000285428	1	6
TGME49_226220	-3.59864	0.000517008	1	4
TGME49_226240	1.12152	1	1
TGME49_226250	0.663672	0.00200711	23	19
TGME49_226280	-4.58808	6.4066e-07		8
TGME49_226370	-0.711106	0.78233		1
TGME49_226400	3.07335	0.215884	4	2
TGME49_226410	-2.53961	0.00136044	2	4
TGME49_226430	0.449722	0.812691	3	3
TGME49_226500	-0.975364	0.612865	1	2
TGME49_226510	-0.977349	0.78233	1	1
TGME49_226590	-8.22544	1.18129e-11	1	7
TGME49_226660	0.820106	0.140643	8	6
TGME49_226680	1.29146	0.724889	2	1
TGME49_226710	1.72957	0.274731	4	2
TGME49_226730	-5.00996	9.23294e-41	7	37
TGME49_226830	0.967499	0.126522	17	11
TGME49_226870	3.06716	0.514841	1
TGME49_226890	-2.98502	0.166054		1
TGME49_226950	-2.17611	0.514841		1
TGME49_226960	-0.412189	6.38155e-06	35	36
TGME49_226970	1.02564	0.0709593	9	10
TGME49_226980	-3.14979	0.00643518		2
TGME49_227030	0.662921	0.168133	5	6
TGME49_227140	-3.89256	0.00106294		3
TGME49_227280	0.088975	0.934123	2	2
TGME49_227290	0.51421	0.119612	4	3
TGME49_227300	-2.06036	0.0217285		4
TGME49_227310	1.95031	0.78233		1
TGME49_227360	-2.98376	2.02064e-05	8	13
TGME49_227400	-3.75968	1.07101e-08		6
TGME49_227410	-2.56867	0.166054		1
TGME49_227420	1.93111	0.605274	3	2
TGME49_227450	-1.98066	0.0222155		2
TGME49_227600	0.715695	0.370074	2	2
TGME49_227610	1.19788	0.514841		1
TGME49_227620	0.443306	0.934123	2	2
TGME49_227650	0.0334294	1		1
TGME49_227790	0.0216105	0.78233		1
TGME49_227810	-0.134473	0.446199	3	1
TGME49_227830	-4.10484	4.36476e-08	1	5
TGME49_227900	-2.3615	0.000203548		5
TGME49_227910	-5.89097	4.0915e-06		3
TGME49_227948	-6.0722	1.43235e-58	6	46
TGME49_227952	-1.8517	0.207519		2
TGME49_227960	-0.302061	0.96048	8	7
TGME49_227990	-3.6795	1.79307e-18	2	12
TGME49_228000	-2.89897	0.166054		1
TGME49_228120	-0.61127	0.996454		2
TGME49_228150	-3.18308	0.295536		1
TGME49_228170	2.1767	2.1207e-10	19	2
TGME49_228180	-1.68547	0.00390262		3
TGME49_228190	0.276254	0.434427	5	1
TGME49_228210	-3.30672	0.00173331	3	9
TGME49_228250	-5.4181	1.46752e-24		23
TGME49_228290	1.82773	0.00354689	6	4
TGME49_228320	-2.12519	0.166054		1
TGME49_228350	-2.50897	0.166054		1
TGME49_228360	-1.6846	0.166054		1
TGME49_228470	0.790132	0.00598949	6	5
TGME49_228630	-3.09378	0.0121911	1	6
TGME49_229000	-2.9046	0.00224633		4
TGME49_229010	1.46018	0.0114205	7	3
TGME49_229140	-1.74138	0.00390262	2	3
TGME49_229180	0.576526	0.166054	20	16
TGME49_229210	-3.02569	0.0119741		1
TGME49_229250	0.806278	0.396963	5	6
TGME49_229310	0.0806073	1		1
TGME49_229340	-4.85393	6.43226e-09		10
TGME49_229360	-0.263994	0.553328	11	13
TGME49_229390	-0.0244341	1	1
TGME49_229420	-1.63036	0.166054		1
TGME49_229480	-3.14809	0.049537	1	4
TGME49_229620	-4.0203	2.77104e-19		18
TGME49_229670	0.950072	0.648809	4	5
TGME49_229740	-2.72575	4.73202e-06		6
TGME49_229750	-0.199902	0.472344	1	2
TGME49_229900	-3.42506	4.08541e-11		7
TGME49_229920	-7.74991	2.09953e-17	2	13
TGME49_229930	-2.72603	4.0915e-06		4
TGME49_229950	-0.234714	0.286405	9	8
TGME49_229990	0.930213	0.000218139	18	15
TGME49_230050	-4.94855	2.45134e-05		5
TGME49_230070	-3.64733	0.514841		1
TGME49_230100	-0.0425082	0.78233		1
TGME49_230140	-0.913804	0.166054		1
TGME49_230160	-2.58703	0.0891216	1	2
TGME49_230210	-1.64982	0.0365181		2
TGME49_230220	-0.85578	0.347275	1	1
TGME49_230350	1.27971	0.0194571	7	4
TGME49_230400	2.15312	0.166054		1
TGME49_230410	-9.02911	1.86057e-17	2	13
TGME49_230420	0.680733	0.00308269	25	19
TGME49_230430	-3.14006	0.557216	1	1
TGME49_230450	-0.620206	0.730974	7	8
TGME49_230520	-3.44372	0.0152068		3
TGME49_230590	-1.66281	0.78233	1
TGME49_230630	-0.634303	1		1
TGME49_230690	-3.36104	5.19919e-07		6
TGME49_230910	-3.54557	0.00799058		3
TGME49_230920	-0.201972	0.724889	1	1
TGME49_230940	-2.26295	5.90305e-05	1	8
TGME49_230960	1.47374	0.000151816	15	9
TGME49_231070	0.556302	0.514841		1
TGME49_231080	2.66412	0.0365181	2	1
TGME49_231120	-2.44425	0.166054		1
TGME49_231130	-2.57558	0.0651021	1	3
TGME49_231140	-0.0730257	0.605274	3	3
TGME49_231150	-1.70584	9.20898e-06	4	7
TGME49_231160	-0.194345	1	1	1
TGME49_231210	-2.28325	0.108956	1	2
TGME49_231350	-2.33396	0.00268673		7
TGME49_231410	-6.54025	1.15278e-23	1	17
TGME49_231430	1.32952	0.471919	4	2
TGME49_231440	-3.69713	0.00259565		2
TGME49_231460	-4.37842	7.03413e-08		5
TGME49_231480	-0.0272252	0.745455	20	20
TGME49_231600	0.303059	0.447197	8	7
TGME49_231630	-3.27558	4.604e-09	7	11
TGME49_231640	-2.4244	1.37808e-12	9	17
TGME49_231750	-4.18345	1.14988e-13		12
TGME49_231850	-4.50739	4.7278e-12	4	11
TGME49_231910	-6.71775	1.42752e-15		12
TGME49_231920	-0.676786	0.0891216	2	3
TGME49_231940	-0.627543	1	1	1
TGME49_231970	-3.02328	3.79685e-06	8	15
TGME49_232030	-3.96362	0.166054		1
TGME49_232050	-2.2122	0.78233		1
TGME49_232060	-1.86047	0.00643518		2
TGME49_232080	-2.2338	0.0119734		3
TGME49_232090	-6.68288	1.52811e-25	1	17
TGME49_232100	-0.822986	0.0446676		3
TGME49_232130	0.574813	0.601457	8	7
TGME49_232150	0.562523	0.127671	4	2
TGME49_232180	0.630592	0.315311	5	6
TGME49_232190	1.30625	0.609822	2	1
TGME49_232230	1.02084	0.596431	5	5
TGME49_232250	0.199985	1	4	3
TGME49_232260	-2.00061	0.212842		2
TGME49_232280	-2.42115	0.000160119		6
TGME49_232300	0.583813	0.173912	11	10
TGME49_232340	-8.94855	2.69011e-41	2	29
TGME49_232350	-1.62748	3.39833e-07	11	13
TGME49_232390	1.96066	1	1
TGME49_232440	-4.20073	5.24851e-05		5
TGME49_232530	-1.35093	0.00102049		4
TGME49_232540	-4.9096	1.38406e-19	1	18
TGME49_232600	-3.12771	6.61148e-05	3	7
TGME49_232660	-3.26419	0.0597119		2
TGME49_232710	-0.409402	0.514841	14	14
TGME49_232730	0.0306453	0.892807	1	2
TGME49_232800	0.818713	0.78233		1
TGME49_232940	1.58076	4.71602e-08	16	13
TGME49_232980	-2.91756	0.0119741		2
TGME49_233000	1.05155	0.825516	4	3
TGME49_233010	-0.950677	0.185833	1	2
TGME49_233020	-0.472142	1	3	4
TGME49_233080	-2.89893	0.00357602		4
TGME49_233100	1.18191	0.0862885	8	6
TGME49_233110	-2.7636	0.0222155	1	4
TGME49_233140	-1.77858	0.00643518		2
TGME49_233170	-2.68851	0.295536		1
TGME49_233220	2.3777	0.0077733	6	2
TGME49_233260	-2.36821	0.166054		1
TGME49_233460	2.44972	1.47894e-05	7	4
TGME49_233490	-1.1599	0.166054		1
TGME49_233500	-3.92062	0.166054		1
TGME49_233520	0.747842	0.0310698	13	10
TGME49_233680	-4.12164	6.81194e-07		4
TGME49_233860	-3.85379	0.166054		1
TGME49_233890	-3.60265	4.56517e-12	1	8
TGME49_233930	-4.08809	1.57312e-21	1	14
TGME49_234190	-3.36836	0.00643518		2
TGME49_234230	-2.77333	0.166054		1
TGME49_234280	-2.03938	2.01558e-07		10
TGME49_234380	2.21852	0.0253854	6	2
TGME49_234420	-2.86965	4.72423e-06	8	12
TGME49_234450	-0.483942	1	5	4
TGME49_234490	0.388403	0.78233	1	2
TGME49_234505	-1.59601	1.14858e-05	6	8
TGME49_235020	-1.47918	0.0222155	2	3
TGME49_235150	-0.531362	0.414178	4	3
TGME49_235160	1.01572	0.000101354	20	16
TGME49_235170	-4.30538	0.00643518		2
TGME49_235340	-4.84846	5.65221e-24		21
TGME49_235398	-4.33898	2.67717e-07		7
TGME49_235402	0.413351	1	1
TGME49_235420	-4.41668	0.295536	1	2
TGME49_235470	-0.17872	0.371464	34	33
TGME49_235490	0.348913	0.523187	9	7
TGME49_235540	-1.88698	0.0446676	2	2
TGME49_235560	-1.12286	0.212842		2
TGME49_235660	-1.04857	0.514841	1	2
TGME49_235670	0.374008	0.78233		1
TGME49_235880	-3.98316	0.00621196		3
TGME49_235930	0.878569	0.0172531	18	12
TGME49_235970	1.07248	0.166054	14	11
TGME49_235990	-0.63338	0.185833		3
TGME49_236000	-4.90246	9.22753e-07		4
TGME49_236040	-4.47467	7.54646e-11	5	16
TGME49_236110	-3.03072	9.4487e-05		5
TGME49_236140	-4.52108	7.592e-41	4	32
TGME49_236160	-1.788	0.514841		1
TGME49_236210	-7.67005	2.32036e-42	9	29
TGME49_236250	-2.73067	1.71162e-06		7
TGME49_236510	-3.60999	2.09463e-07		6
TGME49_236540	0.4242	0.090249	5	2
TGME49_236550	-0.884258	0.514841		1
TGME49_236570	0.155412	0.439872	6	5
TGME49_236620	-2.11726	0.00044427	1	6
TGME49_236650	-0.429173	0.00973017	14	16
TGME49_236820	3.09911	0.135748		2
TGME49_236840	-2.93033	0.000158955		4
TGME49_236930	-1.16437	0.166054		1
TGME49_236970	-3.36434	0.00106294	1	2
TGME49_237010	-2.16225	8.09395e-13	17	19
TGME49_237100	-1.35525	0.000176066		3
TGME49_237120	-1.7299	0.00799058		3
TGME49_237150	-3.40142	0.00049978	8	10
TGME49_237220	-0.793738	1		1
TGME49_237250	0.596447	0.213013	5	4
TGME49_237280	-0.354026	0.166054		1
TGME49_237290	-5.05047	0.295536		1
TGME49_237470	-3.21061	8.6472e-16		11
TGME49_237520	0.551447	0.892807		2
TGME49_237530	-1.51937	0.514841		1
TGME49_237560	-3.99023	0.0013358		4
TGME49_237820	-0.865045	0.514841	1	1
TGME49_237840	-1.36266	0.00683675		4
TGME49_238000	-3.59098	9.01725e-07		4
TGME49_238010	2.76045	0.0651308	7	4
TGME49_238040	-3.41378	1.44021e-07	6	16
TGME49_238050	-0.598802	0.0388956	15	18
TGME49_238100	0.702484	0.78233	1	1
TGME49_238180	-0.175309	0.648809	6	6
TGME49_238190	-2.31641	0.00033413		2
TGME49_238250	2.69252	0.609822	2
TGME49_238380	1.40135	1	1
TGME49_238940	1.52849	0.000129276	5	1
TGME49_238950	-0.681526	0.856811	4	4
TGME49_239087	-4.22644	5.58395e-07		4
TGME49_239100	0.370985	0.118161	13	13
TGME49_239260	2.71666	0.00643518	2
TGME49_239330	4.41033	0.153001	4	5
TGME49_239350	-2.40501	1.02792e-06		10
TGME49_239400	1.2903	0.514841	3	1
TGME49_239490	-2.40397	4.86459e-12	14	19
TGME49_239610	-3.80876	0.166054		1
TGME49_239620	-0.956263	0.0868929	2	3
TGME49_239680	3.42558	0.00643518	2
TGME49_239720	-4.67513	4.0915e-06		4
TGME49_239752	-2.20463	0.159146	9	11
TGME49_239760	0.658796	0.452635	3	3
TGME49_239790	-0.627248	0.724889	2	1
TGME49_239820	0.728032	0.000572681	22	21
TGME49_240060	-0.0507519	1	1	1
TGME49_240270	-2.67503	0.166054		2
TGME49_240280	0.499947	0.672346	3	3
TGME49_240510	-0.464035	1	2	2
TGME49_240520	1.76699	0.166054	1
TGME49_240590	-0.716412	0.0152068	1	3
TGME49_240600	1.93281	4.42546e-05	9	4
TGME49_240640	-0.932449	0.669609	6	6
TGME49_240650	0.00912059	0.913799	22	16
TGME49_240690	-0.725124	0.0567059	3	3
TGME49_240710	-2.90534	0.0013358		4
TGME49_240810	-1.81697	0.0112723	2	3
TGME49_240830	-3.86028	0.000176066		3
TGME49_240860	0.471131	0.489372	7	5
TGME49_240870	0.0176186	0.787805	8	9
TGME49_240890	-0.362744	0.724889	8	9
TGME49_241150	3.29199	0.166054		1
TGME49_241170	1.1945	0.0012602	20	12
TGME49_241880	-1.10168	0.212842		2
TGME49_242030	-0.972489	0.514841	1
TGME49_242070	-1.40982	0.00586207	2	7
TGME49_242330	0.794218	0.167207	11	8
TGME49_242380	0.926052	0.85009	4	4
TGME49_242460	-2.95614	7.10198e-08	1	7
TGME49_242570	-2.99021	0.166054		1
TGME49_242660	0.106993	0.753478	6	4
TGME49_242830	-2.98782	0.0597119		2
TGME49_242840	-6.52881	5.82672e-09		6
TGME49_243250	-0.724545	0.0183883	12	17
TGME49_243280	-1.63756	0.166054		1
TGME49_243440	-2.06731	0.000285428	2	6
TGME49_243490	-7.21204	3.22641e-18	1	14
TGME49_243530	-3.93572	1.23449e-14		13
TGME49_243540	0.514607	0.59424	8	5
TGME49_243570	-0.860858	0.88474	2	3
TGME49_243580	-4.07861	4.73202e-06		4
TGME49_243590	0.286522	1	1
TGME49_243710	-0.9337	0.000140145	12	17
TGME49_243730	-3.50947	7.93354e-09		7
TGME49_243760	-1.80267	0.166054		1
TGME49_243800	-0.286716	0.0295164	14	15
TGME49_243910	1.3544	0.205583	5	3
TGME49_243920	-0.261673	0.166054	2	1
TGME49_243950	1.44998	0.000690221	7	7
TGME49_243960	-4.42902	1.4732e-16	9	18
TGME49_244050	-3.50152	0.166054		1
TGME49_244100	1.58269	0.0151803	7	4
TGME49_244110	-1.28665	0.212842	1	1
TGME49_244150	-0.436038	0.78233	2	1
TGME49_244200	-7.95256	1.10272e-86	19	54
TGME49_244290	-0.986043	0.0983185	3	4
TGME49_244310	0.9386	0.00791434	5	2
TGME49_244320	2.31955	0.00153139	6	4
TGME49_244370	-0.312986	1	2	3
TGME49_244380	-1.43098	0.295536		1
TGME49_244440	-0.634739	0.514841		1
TGME49_244460	-3.13446	0.000176066		3
TGME49_244560	0.274469	0.329082	38	37
TGME49_244570	-2.36829	0.00040998		4
TGME49_244630	-2.58656	0.00237347		5
TGME49_244650	-0.323107	0.892807	2
TGME49_244690	-2.60797	0.166054		1
TGME49_244840	1.68905	0.135748	2	1
TGME49_244870	-4.37198	6.97497e-09		6
TGME49_244880	-3.7355	0.166054		1
TGME49_245450	-2.51386	0.090249		2
TGME49_245460	1.42602	0.000400472	8	9
TGME49_245470	0.762122	0.996454	5	3
TGME49_245490	-2.75397	2.6934e-08		8
TGME49_245610	1.73434	0.897315	4	3
TGME49_245620	2.42524	0.0623286	3	3
TGME49_245670	1.14818	0.526462	7	7
TGME49_245680	1.27854	0.00860081	14	11
TGME49_245730	2.16097	0.166054		1
TGME49_246060	-4.57403	4.28861e-05		3
TGME49_246170	-1.73126	0.0300609	1	4
TGME49_246330	3.25039	0.295536	1
TGME49_246500	2.69152	0.166054		1
TGME49_246530	-4.84777	3.47171e-14		15
TGME49_246540	-5.36701	6.37453e-20		14
TGME49_246550	0.591575	0.514841	1	1
TGME49_246560	-2.80622	0.166054		1
TGME49_246580	4.31309	0.166054	1
TGME49_246630	1.10598	0.78233	1	1
TGME49_246720	-3.84471	0.0136537		2
TGME49_246740	-2.62007	0.00643518		2
TGME49_246920	-2.04832	0.00033413		3
TGME49_246950	-3.13934	0.0983185		2
TGME49_246982	-0.59081	0.514841		1
TGME49_247195	-1.03337	0.0127589	3	5
TGME49_247280	-3.17324	0.0365181	1	1
TGME49_247330	-2.32732	0.212842		2
TGME49_247350	-2.1033	0.00799058	1	2
TGME49_247410	-6.15864	0.000176066		2
TGME49_247450	-2.8045	4.73202e-06		5
TGME49_247460	1.18619	0.618898	6	5
TGME49_247470	1.88937	0.00265001	15	7
TGME49_247510	2.02788	7.13805e-08	16	17
TGME49_247520	2.88198	0.295536	1
TGME49_247550	-8.38356	2.66343e-28	14	28
TGME49_247590	-1.90113	0.0348389		3
TGME49_247600	-1.57397	0.514841		1
TGME49_247648	0.0579732	1	1
TGME49_247680	2.31992	1	1
TGME49_247740	-2.64369	0.00281631		4
TGME49_247770	-8.69082	1.67488e-15		7
TGME49_248100	-0.494757	0.514841	1
TGME49_248120	0.100668	0.724889		2
TGME49_248130	-1.67173	0.0131695		6
TGME49_248180	-1.05664	0.347275		1
TGME49_248320	0.524492	0.523187	7	7
TGME49_248340	1.87328	5.79159e-13	17	13
TGME49_248390	0.696129	0.855076	8	11
TGME49_248460	-2.98924	0.132951	1	2
TGME49_248480	1.97734	0.000100179	10	7
TGME49_248630	0.38328	0.159566	7	6
TGME49_248640	-5.02912	2.80807e-37		33
TGME49_248740	-3.55071	0.00259565		3
TGME49_248790	-0.519008	0.0446676	1	2
TGME49_248810	-0.144444	0.514841	8	8
TGME49_248880	-0.00732257	0.578562	4	5
TGME49_248950	0.626961	0.78233	1
TGME49_249000	0.171916	1		1
TGME49_249030	-2.15557	0.166054	1	1
TGME49_249180	-3.4694	4.53048e-11		7
TGME49_249215	-1.78215	3.63198e-05		6
TGME49_249250	-0.251605	0.514841	6	7
TGME49_249270	-2.89788	0.00135414	5	9
TGME49_249320	1.65258	0.135748	2	1
TGME49_249390	-4.05222	3.30568e-36	22	45
TGME49_249490	-1.23725	0.281382		2
TGME49_249530	1.5774	0.000151657	13	6
TGME49_249560	-3.85989	0.166054		1
TGME49_249610	0.146787	0.514841	6	3
TGME49_249630	-3.74929	1.69579e-07		5
TGME49_249670	-2.49326	0.514841		2
TGME49_249690	-5.52538	4.0915e-06		4
TGME49_249730	-2.50499	4.44885e-12	3	9
TGME49_249760	-0.192269	0.78233		1
TGME49_249780	-0.901699	0.185833		3
TGME49_249790	-3.56509	0.0205871		3
TGME49_249850	-8.61894	0.0112723	1	3
TGME49_249870	-4.21795	0.166054		1
TGME49_249900	0.983935	0.000412155	24	20
TGME49_249910	-2.20949	0.166054		2
TGME49_249990	1.47807	0.00350602	7	4
TGME49_250090	-2.28352	3.21981e-05		5
TGME49_250340	-5.31154	2.76205e-07	1	5
TGME49_250360	-1.22902	0.00643518		2
TGME49_250700	-1.19767	0.78233	1	1
TGME49_250770	0.242291	0.166054	22	27
TGME49_250820	-2.24373	0.000176066		3
TGME49_250830	-1.12565	0.996454	1	2
TGME49_250900	-2.68333	0.166054		1
TGME49_251500	0.266476	0.817471	15	15
TGME49_251610	-1.27503	0.514841		1
TGME49_251620	-1.54262	0.166054		1
TGME49_251630	-2.18486	0.0597119	1	2
TGME49_251690	-1.67885	5.8552e-05	10	12
TGME49_251780	-5.64825	1.96948e-50	22	44
TGME49_251810	-2.46593	0.00173331	1	4
TGME49_251850	0.0900631	0.913091	5	4
TGME49_251870	2.50943	0.0217285	3	3
TGME49_251880	-3.32483	0.00349831		3
TGME49_251885	-2.99001	0.0013358		3
TGME49_251890	-3.67406	6.12925e-23	2	25
TGME49_251930	-3.03201	0.0553539	3	4
TGME49_251950	-4.64634	1.77677e-05		3
TGME49_252220	-2.01545	0.000176066		3
TGME49_252270	-2.76443	0.00791434	1	4
TGME49_252290	-2.78375	4.07484e-13	6	9
TGME49_252360	0.500344	0.904437	6	6
TGME49_252380	-3.73208	0.166054		1
TGME49_252430	0.734215	0.166054	1	1
TGME49_252440	1.56452	0.121769	7	2
TGME49_252480	-3.92082	0.0222155		2
TGME49_252510	2.01605	2.44054e-06	10	1
TGME49_252630	-5.62142	5.82672e-09		5
TGME49_252850	-2.1885	0.000762457	2	4
TGME49_252870	-1.85646	0.325755		3
TGME49_253040	1.59842	0.78233		1
TGME49_253290	0.0781898	0.1327	25	19
TGME49_253430	0.937664	0.15373	17	13
TGME49_253440	-2.97244	0.0119741		2
TGME49_253470	-0.390518	1		1
TGME49_253560	-1.98836	0.0597119		2
TGME49_253640	-1.00266	0.609822	1	1
TGME49_253650	-0.131479	0.996454	1	1
TGME49_253700	-1.23037	0.609822		2
TGME49_253730	0.728408	0.0249106	12	10
TGME49_253740	-1.33757	0.514841		2
TGME49_253750	-2.75279	0.0112723		3
TGME49_253800	-5.17253	1.40876e-12		10
TGME49_253820	-1.17325	0.166054		1
TGME49_253880	-0.0885539	0.934123	1	3
TGME49_254030	-6.64863	7.55911e-13	1	7
TGME49_254135	-2.15351	0.00259565		3
TGME49_254230	-4.35641	5.05493e-06	1	6
TGME49_254270	0.682649	0.166054	1	1
TGME49_254300	-1.44559	0.158809		3
TGME49_254370	3.249	0.78233	1
TGME49_254380	-5.28873	0.0119741		2
TGME49_254400	-5.30105	6.61331e-05		4
TGME49_254410	-2.86988	2.57049e-05		3
TGME49_254440	1.11146	0.370074	2	2
TGME49_254520	-3.41601	0.00643518		2
TGME49_254530	-2.66919	3.78137e-11		11
TGME49_254570	-1.75428	0.00643518		2
TGME49_254580	0.937971	0.761659	3	2
TGME49_254620	3.06573	0.00609128	3	1
TGME49_254650	-4.55087	0.166054		1
TGME49_254690	-1.0404	0.090249	1	2
TGME49_254800	-3.03378	7.26619e-05		3
TGME49_254810	-4.04231	3.47941e-25		25
TGME49_254820	0.390354	0.78233	1
TGME49_254870	1.154	0.514841		1
TGME49_254880	1.14547	0.514841	2
TGME49_254920	-1.50244	0.514841		1
TGME49_254940	-1.69355	0.0597119		2
TGME49_255060	-6.07202	0.166054		1
TGME49_255170	-3.85096	2.52329e-18		20
TGME49_255190	0.187591	0.78233	15	11
TGME49_255260	-6.02455	0.434427		1
TGME49_255340	-1.81451	0.0153693	1	5
TGME49_255350	-0.412525	0.446199	3	3
TGME49_255410	1.79623	0.166054		1
TGME49_255420	-0.334763	0.166054	7	6
TGME49_255470	-1.65261	0.0348389		3
TGME49_255870	-1.94725	0.00643518		2
TGME49_255880	-0.443272	0.526059	2	3
TGME49_255890	-1.47826	0.166054		1
TGME49_255980	0.16506	0.472344	3	1
TGME49_256000	-0.556444	0.78233	2	2
TGME49_256060	-3.38074	0.0597119		2
TGME49_256090	-0.796697	0.295536		1
TGME49_256760	-6.0646	2.80825e-13		16
TGME49_256770	-0.0560922	0.54649	11	15
TGME49_256840	-0.55668	1	1
TGME49_256970	1.44009	0.130653	9	4
TGME49_256980	-0.375413	0.838455	3	3
TGME49_256990	0.0156838	0.538658	8	11
TGME49_257090	-4.24042	1.43754e-09	1	6
TGME49_257340	1.0657	0.348341	2	3
TGME49_257350	-1.26667	0.347275		2
TGME49_257390	-4.01007	2.81441e-18		15
TGME49_257480	-3.83939	2.66752e-13		12
TGME49_257500	-2.64956	1.77447e-05		6
TGME49_257530	-0.741882	0.740085	3	3
TGME49_257560	-3.95435	5.82672e-09		9
TGME49_257640	-1.47577	0.78233	1
TGME49_257680	-2.1796	0.00281631	2	4
TGME49_257730	-7.09336	8.26438e-18		12
TGME49_257740	-1.86891	0.514841		1
TGME49_257800	-3.2057	0.166054		1
TGME49_257960	-0.403111	0.876984	2	1
TGME49_257980	-1.81437	0.166054		1
TGME49_257990	0.546957	0.40926	11	13
TGME49_258000	-3.75636	7.31429e-16		16
TGME49_258050	1.02366	0.071343	3	1
TGME49_258060	-3.63829	0.00390262		3
TGME49_258070	1.56202	8.3335e-06	18	12
TGME49_258100	-0.803883	0.514841		1
TGME49_258110	1.11339	0.071343	2	1
TGME49_258130	-0.855651	0.166054	1	1
TGME49_258210	-0.596997	0.166054		1
TGME49_258240	-1.23014	0.78233		1
TGME49_258380	-3.26805	0.295536		1
TGME49_258390	2.00273	0.281382	2
TGME49_258462	-3.52231	0.166054		1
TGME49_258540	1.37308	0.78233		1
TGME49_258580	0.336225	1	11	10
TGME49_258630	-2.40402	0.000209836		4
TGME49_258650	-4.09519	4.60364e-13		12
TGME49_258740	0.511492	0.173912	14	14
TGME49_258860	0.216307	0.78233	1
TGME49_258870	1.02211	0.21938	5	2
TGME49_258950	1.21167	0.78233	1	1
TGME49_258970	0.678001	1	2	1
TGME49_259160	3.32335	0.166054	1
TGME49_259200	-1.10992	0.101242		4
TGME49_259240	-0.638242	0.915184	2	1
TGME49_259260	-0.963903	0.0290225	6	9
TGME49_259550	-2.67138	3.20382e-12	2	12
TGME49_259600	0.782208	0.434427	1	1
TGME49_259640	1.30594	0.166054	1
TGME49_259660	1.7131	0.00199972	5	4
TGME49_259710	-7.19424	1.87796e-16		13
TGME49_259850	-4.89208	2.71806e-10		8
TGME49_259880	-1.90053	0.295536		1
TGME49_259950	-5.63687	0.166054		1
TGME49_260010	-0.509524	0.048616	2	3
TGME49_260140	-4.04093	1.63741e-08		8
TGME49_260170	-5.70856	1.4805e-32	5	30
TGME49_260180	-7.67038	2.78236e-11		7
TGME49_260200	2.52808	0.514841	1
TGME49_260210	-1.83355	0.000556167		4
TGME49_260230	-1.32321	0.218205		3
TGME49_260240	0.572737	1	3	3
TGME49_260320	-1.36978	0.794105	2	2
TGME49_260440	-0.800964	0.205689	2	3
TGME49_260450	-6.81569	0.166054		1
TGME49_260470	-3.91074	1.36879e-18		20
TGME49_260510	-1.34573	0.295536		1
TGME49_260540	-1.85738	0.0597119		2
TGME49_260630	0.685295	0.882548	4	3
TGME49_260660	-3.69123	6.84127e-07		5
TGME49_260790	-5.04965	1.15879e-11		9
TGME49_260800	-1.62522	0.514841		1
TGME49_260840	-3.08153	1.77677e-05		5
TGME49_261000	-0.548756	0.212842	1	1
TGME49_261010	-0.5268	0.0597119	8	13
TGME49_261030	-4.25833	3.24693e-12	1	10
TGME49_261050	1.21584	0.78233		1
TGME49_261070	0.901189	0.255911	4	2
TGME49_261080	-2.16837	0.033435	2	5
TGME49_261210	-0.341048	0.029999	10	11
TGME49_261250	3.63827	0.166054	1
TGME49_261380	-2.12821	0.295536		1
TGME49_261450	-0.10535	0.78233		1
TGME49_261460	0.864399	0.00847743	7	5
TGME49_261475	-3.94823	0.00799058		3
TGME49_261480	0.0313911	0.740085	3	2
TGME49_261510	-4.52381	9.16973e-14	1	11
TGME49_261570	-0.164899	0.250093	13	12
TGME49_261600	-2.86892	1.195e-12		11
TGME49_261760	0.991945	0.996454	2	1
TGME49_261950	-7.02237	5.11798e-46	10	28
TGME49_262000	-1.35531	0.0182566		4
TGME49_262040	-1.00444	0.000396433	7	8
TGME49_262050	2.24031	0.166054	6	4
TGME49_262100	-3.82022	7.45519e-12		11
TGME49_262140	-1.56144	0.678624	1	2
TGME49_262380	-0.566809	0.00799876	20	22
TGME49_262450	0.169054	1	1
TGME49_262520	-0.303769	1	1	1
TGME49_262620	-0.293344	0.973005	7	8
TGME49_262640	-6.44486	1.34321e-17	1	8
TGME49_262670	0.722626	0.322797	8	10
TGME49_262690	0.279459	0.973005	6	6
TGME49_262700	-2.5333	0.166054		2
TGME49_262710	0.445756	0.78233		1
TGME49_262720	-1.01621	0.609822	2	1
TGME49_262730	1.27189	0.21938	4	3
TGME49_262960	4.46867	4.94406e-11	16	9
TGME49_263040	0.363274	1	4	6
TGME49_263050	0.277832	0.371464	9	10
TGME49_263060	-0.285589	0.266192	6	8
TGME49_263070	-0.00146881	0.946812	10	8
TGME49_263080	-5.74839	2.76523e-14		7
TGME49_263090	-4.97748	0.000237615	2	6
TGME49_263110	-2.06462	0.166054		1
TGME49_263130	-1.03805	0.297796	1	4
TGME49_263180	0.209352	0.299435	16	12
TGME49_263300	2.55454	1.03151e-08	14	9
TGME49_263320	-4.12766	0.00102056	2	6
TGME49_263400	-4.57102	1.77677e-05		5
TGME49_263430	0.527715	1	1
TGME49_263500	0.0623041	0.78233	5	6
TGME49_263510	-0.407021	0.78233		1
TGME49_263530	-9.22628	8.04049e-13	1	5
TGME49_263550	-2.8553	0.166054		1
TGME49_263560	-1.30717	0.514841	1	1
TGME49_263580	-1.2653	0.159914	1	4
TGME49_263630	-3.19241	4.28861e-05		3
TGME49_263650	-1.55866	0.000188111	1	4
TGME49_263680	-3.85894	0.00643518		2
TGME49_263700	1.23042	0.0239022	9	9
TGME49_263740	-1.49103	0.00199972		4
TGME49_263750	-5.5372	2.469e-25		24
TGME49_263760	-1.91459	1.43524e-07		6
TGME49_263810	-3.65468	0.00275167	2	3
TGME49_263840	-3.61277	4.88438e-15		14
TGME49_263850	-2.15451	2.98243e-05	3	3
TGME49_263870	0.314612	0.287663	12	14
TGME49_264030	-2.49529	1.31327e-05		5
TGME49_264040	-7.70698	5.19508e-20	1	10
TGME49_264060	1.94467	0.0159231	7	2
TGME49_264160	-3.4536	3.49711e-12		13
TGME49_264178	-2.67078	0.166054		1
TGME49_264200	-2.82915	0.78233		1
TGME49_264420	-0.82829	0.514841		1
TGME49_264440	-0.913375	0.250745	5	6
TGME49_264450	1.14681	0.00767173	9	4
TGME49_264600	0.21333	0.78233	1	1
TGME49_264610	2.50517	0.295536	1
TGME49_264660	-4.7098	0.166054		1
TGME49_264720	-6.51335	0.166054		1
TGME49_264730	-4.68716	5.58395e-07		5
TGME49_264830	-0.159099	1		1
TGME49_264860	-1.48271	0.00578939	1	2
TGME49_264890	-1.19589	0.514841		2
TGME49_265010	0.174012	1		1
TGME49_265020	0.927758	0.78233	1
TGME49_265180	-1.50376	0.0222155		2
TGME49_265220	-6.34439	6.25649e-16		7
TGME49_265230	0.88809	0.78233		1
TGME49_265250	-2.10975	0.0365181		2
TGME49_265330	-2.18716	0.000915186	2	4
TGME49_265360	-2.63871	0.723761	5	7
TGME49_265370	-7.13394	1.29685e-14		8
TGME49_265450	-0.68684	0.266599	4	3
TGME49_265470	-4.93955	1.32995e-15		14
TGME49_265520	2.16269	5.2009e-12	14	7
TGME49_265530	0.462847	0.132951	2	1
TGME49_266060	0.00179012	0.673577	9	8
TGME49_266070	0.0033705	1	3	3
TGME49_266080	-1.95817	0.00701554	3	7
TGME49_266090	-0.149319	0.957798	3	3
TGME49_266110	-2.49433	5.5551e-07	1	8
TGME49_266260	-3.06026	5.82672e-09		6
TGME49_266435	1.10062	0.166054	1
TGME49_266640	-3.28059	7.38154e-11	13	20
TGME49_266730	-3.17188	0.295536		1
TGME49_266760	-1.99027	4.93038e-06	3	8
TGME49_266800	1.19981	0.892807	2	1
TGME49_266840	-3.26353	0.000294377		4
TGME49_266850	-4.9647	2.17818e-21		8
TGME49_266960	0.31087	0.0737337	6	5
TGME49_266990	0.843793	8.15577e-06	26	23
TGME49_267040	-4.36006	3.2693e-10	1	8
TGME49_267050	-0.797921	0.090249	1	1
TGME49_267060	-1.62658	0.514841		1
TGME49_267070	-2.36233	0.166054		1
TGME49_267080	-0.818428	0.324592	7	6
TGME49_267100	-2.40779	0.0119741		2
TGME49_267330	-3.99577	2.49772e-21	11	23
TGME49_267350	-0.087625	0.370074	2	3
TGME49_267400	1.59146	0.0316109	5	4
TGME49_267430	-1.41568	0.295536		1
TGME49_267480	0.04748	1	3	2
TGME49_267560	-5.16005	1.01031e-33		27
TGME49_267600	-2.19898	0.166054		1
TGME49_267620	0.454108	1	1	3
TGME49_267710	-1.29371	0.78233		1
TGME49_267730	-4.61781	0.0571575		3
TGME49_267775	-3.0244	0.0222155		2
TGME49_267800	-8.18337	0.000552732	5	11
TGME49_267810	0.404495	0.182057	6	4
TGME49_267840	-2.74355	0.295536		1
TGME49_268010	-4.93261	0.295536		1
TGME49_268200	-1.24614	0.0843446	5	5
TGME49_268260	-4.98699	3.83491e-18		16
TGME49_268290	-2.69784	2.76205e-07		6
TGME49_268370	-2.16957	1.30949e-05	1	8
TGME49_268650	-3.609	5.4506e-26	7	24
TGME49_268730	-2.60107	0.166054		1
TGME49_268810	-0.181163	0.514841		1
TGME49_268830	-7.38507	1.38377e-37		24
TGME49_268850	0.903405	0.00113596	14	13
TGME49_268870	-1.11377	0.0803688	3	7
TGME49_268890	-4.24247	3.83491e-18	8	15
TGME49_268950	-1.85817	0.00033413	1	2
TGME49_269000	-1.8876	0.071343		3
TGME49_269180	-3.62362	2.47011e-25		28
TGME49_269190	1.79318	2.18797e-06	11	7
TGME49_269200	1.49813	0.166054	5	2
TGME49_269250	-0.550762	0.347275	1	1
TGME49_269290	0.982569	0.958154	5	2
TGME49_269430	-2.61679	0.00224633		3
TGME49_269450	-3.85308	0.166054		1
TGME49_269480	0.573176	0.514841	2	1
TGME49_269600	2.26408	3.81077e-05	6
TGME49_269770	-3.28443	0.166054		1
TGME49_269780	-1.78986	0.166054		1
TGME49_269800	-3.33375	0.000120926		5
TGME49_269830	-2.45767	1.87579e-08		7
TGME49_269840	-0.0402644	0.996454	4	4
TGME49_269885	1.9886	1.7039e-11	30	14
TGME49_269920	1.53683	0.00209269	7	2
TGME49_269980	-0.966982	0.0522771	7	12
TGME49_270090	-4.40109	5.68481e-17		12
TGME49_270120	-1.23574	0.434427		2
TGME49_270150	-3.36974	1.26155e-16	1	20
TGME49_270240	1.28366	0.347275	1	1
TGME49_270250	3.34473	0.166054	1
TGME49_270270	0.350864	0.996454	1
TGME49_270310	0.109692	0.78233		1
TGME49_270320	-0.439412	1	1	1
TGME49_270370	0.69373	1	1	1
TGME49_270380	2.48202	0.102759	3	3
TGME49_270510	0.789584	0.0460446	23	22
TGME49_270530	-1.98523	0.00033413		2
TGME49_270550	0.513474	0.934123	6	4
TGME49_270570	-1.90649	0.00033413		3
TGME49_270620	-0.601038	0.78233		1
TGME49_270690	-0.844838	0.514841		1
TGME49_270770	-5.67881	3.94235e-23		22
TGME49_270800	-3.99866	6.25649e-16	1	16
TGME49_270865	1.583	0.78233	3	1
TGME49_270960	-2.75924	0.295536	1
TGME49_271050	-0.0175834	1	1	1
TGME49_271060	-1.96223	0.0222155		2
TGME49_271110	-4.94269	2.11395e-22		21
TGME49_271120	-1.30836	0.514841		1
TGME49_271178	-4.72185	0.295536		1
TGME49_271240	-1.71833	0.00259565		3
TGME49_271290	-0.57406	0.78233		1
TGME49_271350	-3.16884	0.00256814	2	5
TGME49_271420	-2.77841	0.514841		1
TGME49_271440	0.141538	0.514841	2	1
TGME49_271470	-4.70799	0.0597119		2
TGME49_271740	-0.475717	0.78233	1	1
TGME49_271820	-5.02884	9.91153e-15	2	14
TGME49_271888	1.37923	0.0857616	10	6
TGME49_271930	-1.01607	0.514841	1	2
TGME49_271970	-1.91836	0.78233	3	2
TGME49_272010	2.89722	0.166054	1
TGME49_272030	-2.68271	0.000556167	1	3
TGME49_272210	-2.4367	0.166054		1
TGME49_272290	1.09364	0.78233	5	5
TGME49_272350	0.113421	0.78233	1
TGME49_272390	0.546906	0.514841	1
TGME49_272490	-2.81927	5.05098e-10		10
TGME49_272530	-2.17039	0.166054		1
TGME49_272640	-0.408338	0.514841		1
TGME49_272660	-2.46267	0.000294377		4
TGME49_272670	-3.4513	1.13625e-05		7
TGME49_272910	0.140095	0.569951	22	24
TGME49_273090	-0.845505	0.00598949	7	8
TGME49_273100	-3.28796	1.01119e-07		6
TGME49_273290	1.39024	0.166054		1
TGME49_273370	-3.08167	3.80378e-10	7	17
TGME49_273460	0.711276	0.00386339	24	18
TGME49_273520	-0.130624	0.366764	12	13
TGME49_273540	-0.628096	0.78233	1
TGME49_273560	-1.29136	0.00164565	6	12
TGME49_273760	-2.24404	1.06062e-15	25	28
TGME49_273800	-0.332401	0.514841		1
TGME49_273840	1.20239	0.11196	3	1
TGME49_273870	-2.06384	7.79506e-08	4	12
TGME49_273885	-4.10659	2.00912e-14		16
TGME49_273930	-3.71278	5.58395e-07		4
TGME49_273950	1.43428	0.0205871	3
TGME49_273960	4.21422	0.185833	3	1
TGME49_274060	1.15328	0.0005758	20	12
TGME49_274190	-0.378808	0.801026	9	9
TGME49_275310	1.91934	0.514841		1
TGME49_275350	-2.9974	0.166054		1
TGME49_275650	-3.61365	2.48148e-05	2	8
TGME49_275690	4.11023	0.000121636	16	6
TGME49_275750	-2.98176	0.166054		1
TGME49_275770	0.42458	0.78233	1
TGME49_275802	0.265029	0.971958	4	4
TGME49_275810	-1.10471	0.876984	1	3
TGME49_275860	1.19472	0.514841	2	2
TGME49_276140	1.48011	0.149836	6	6
TGME49_276170	-1.74149	0.0186856	5	7
TGME49_276190	-0.660095	0.78233	1
TGME49_276210	-4.29346	3.31057e-18		10
TGME49_276890	1.15024	0.0676175	9	7
TGME49_276970	3.56458	0.000101768	4
TGME49_277000	0.823489	0.171402	12	6
TGME49_277030	-2.7744	0.0365181		2
TGME49_277240	1.17193	0.0112723	2	2
TGME49_277270	1.63882	5.60639e-05	5	4
TGME49_277490	-1.18191	0.166054		2
TGME49_277500	-0.547321	0.166054	8	12
TGME49_277690	-2.67951	0.166054		1
TGME49_277700	-3.4236	6.84127e-07		5
TGME49_277720	-8.13115	0.166054		1
TGME49_277760	-0.60433	0.78233	1	1
TGME49_277840	-3.24816	0.000176066		3
TGME49_277870	-2.5901	4.28861e-05		4
TGME49_277910	-1.89173	0.0112723		2
TGME49_277970	1.28619	0.00224633	3	1
TGME49_277990	0.134852	1		1
TGME49_278220	-5.049	3.63219e-09		4
TGME49_278250	-5.03879	7.06547e-30		23
TGME49_278550	-2.49488	1.19545e-06		6
TGME49_278660	-4.49465	2.87168e-09	3	10
TGME49_278720	-1.27363	0.348341	2	3
TGME49_278830	1.11483	7.39705e-05	26	21
TGME49_278870	0.589158	0.0167793	47	42
TGME49_278960	-2.59587	0.166054		1
TGME49_278990	-1.57386	0.0207092	11	10
TGME49_279100	0.401314	0.675121	7	4
TGME49_279320	-1.33401	0.281382		1
TGME49_279330	0.950872	0.397462	5	2
TGME49_279390	0.275796	0.510044	15	13
TGME49_279420	1.03288	0.78233	1
TGME49_280370	-1.00183	0.133106	6	8
TGME49_280410	-1.59256	0.166054		1
TGME49_280480	-0.614925	0.78233	1	1
TGME49_280490	0.26919	0.207519	10	5
TGME49_280560	-2.20247	0.00524107	1	4
TGME49_280600	-0.95018	0.00291475	14	17
TGME49_280610	0.133447	0.78233	4	5
TGME49_280660	-2.63992	0.0104068		4
TGME49_280700	-0.330489	0.78233		1
TGME49_280730	0.575067	0.78233		1
TGME49_280740	-1.09911	0.514841		1
TGME49_281370	-2.73653	1.01119e-07	1	6
TGME49_281490	0.538776	0.514841	1
TGME49_281620	1.08092	0.166054	1
TGME49_281630	-2.38796	0.00321094		6
TGME49_281980	-2.41275	0.295536		1
TGME49_282040	-4.31566	6.23168e-28	1	27
TGME49_282180	-5.50228	1.02076e-10		7
TGME49_283510	-2.81431	0.0891216		3
TGME49_283780	-4.30698	0.166054		1
TGME49_283820	-1.36974	0.514841		2
TGME49_283830	-4.52969	3.90473e-17		12
TGME49_283850	-3.24629	2.48577e-11	1	9
TGME49_284010	-1.99218	0.00199972		5
TGME49_284040	-3.55655	1.6875e-15		17
TGME49_284050	1.04212	0.557216	3	1
TGME49_284190	3.85988	5.3195e-67	60	55
TGME49_284540	-3.3515	8.04049e-13		7
TGME49_284560	-0.19691	1	7	8
TGME49_285170	-2.2328	0.0266127		3
TGME49_285180	0.314893	0.514841	1
TGME49_285230	-0.234017	0.996454	1	1
TGME49_285240	-0.590759	0.207519	2	2
TGME49_285268	-3.5723	2.1207e-10		9
TGME49_285272	-4.15975	1.30179e-07		7
TGME49_285510	-1.21461	0.78233		1
TGME49_285660	-0.066418	1	1	1
TGME49_285680	-4.01677	1.65543e-08		5
TGME49_285750	-3.04612	0.00106294	1	3
TGME49_285830	-5.86591	0.00799058		3
TGME49_285840	-4.72173	3.17044e-09		7
TGME49_285850	0.131697	0.725383	2	3
TGME49_285970	-4.84522	2.77104e-19		18
TGME49_285980	1.94984	1.13437e-08	20	16
TGME49_286080	-2.08878	0.166054		1
TGME49_286120	0.31256	1	1
TGME49_286230	-0.665407	0.281382	1	1
TGME49_286260	-3.0538	3.74443e-10		6
TGME49_286410	-3.5799	4.38638e-12	1	13
TGME49_286440	0.76618	0.78233	2	1
TGME49_286510	0.564913	1	1
TGME49_286530	-6.4673	2.91949e-17		5
TGME49_286580	-2.70025	1.51254e-19	14	28
TGME49_286590	0.479523	0.175425	8	6
TGME49_286600	-0.402107	0.166054	1
TGME49_286620	1.69482	0.452635	4	1
TGME49_286630	0.76096	0.012414	4	3
TGME49_286640	-1.55118	0.78233		1
TGME49_286650	-0.540233	0.876984	3	3
TGME49_286720	1.23395	0.0254473	7	4
TGME49_286750	-4.72066	7.55911e-13	1	11
TGME49_287180	-0.00622505	0.514841	2	3
TGME49_287210	-0.179732	0.295536	1	1
TGME49_287480	-2.23731	0.000148202		4
TGME49_287500	-0.0476701	0.287238	24	25
TGME49_288000	0.703925	1	1
TGME49_288280	-1.45392	0.295536		1
TGME49_288320	-4.35279	0.00643518		2
TGME49_288360	-1.66806	1.65543e-08	12	15
TGME49_288380	-0.124678	0.348341	32	39
TGME49_288400	-5.95334	1.31533e-46		34
TGME49_288500	-5.2967	3.92803e-26	13	23
TGME49_288530	0.924286	0.781955	9	6
TGME49_288630	-2.21644	1.52212e-05		4
TGME49_288650	2.2003	8.69774e-07	10	4
TGME49_288685	-5.61191	5.79159e-13		11
TGME49_288710	-4.8488	1.26782e-16		11
TGME49_288720	0.533087	0.0883312	9	10
TGME49_288750	-5.96108	3.21842e-13		9
TGME49_288800	-0.929457	0.166054		1
TGME49_288830	-0.91824	2.05436e-05	24	24
TGME49_288860	1.21986	0.0121106	13	6
TGME49_288990	-2.25941	0.00259565		3
TGME49_289000	-0.228553	0.78233	1
TGME49_289050	-0.832648	0.78233		1
TGME49_289080	-0.821099	0.472344	1	2
TGME49_289140	-4.39329	1.90471e-08		6
TGME49_289200	-2.48427	0.166054		1
TGME49_289300	0.441334	0.0534676	26	21
TGME49_289310	0.958873	0.0232819	11	6
TGME49_289320	-1.0235	0.678624	2	2
TGME49_289330	-3.59637	2.18919e-16	1	13
TGME49_289380	0.592547	0.171566	5	2
TGME49_289530	1.00429	0.878355	4	5
TGME49_289560	-0.135476	0.892807	2	2
TGME49_289570	-1.12493	0.135748	1	1
TGME49_289580	-2.38618	0.514841		1
TGME49_289600	-2.40017	0.00799058		3
TGME49_289650	-4.2939	1.04211e-17	7	19
TGME49_289680	-1.05125	0.0077733	4	5
TGME49_289690	1.69567	1.77749e-09	17	16
TGME49_289750	-0.96274	0.166054	1	1
TGME49_289760	3.44349	9.21041e-15	18	9
TGME49_289770	1.48244	0.025622	11	6
TGME49_289780	-2.11776	0.000243476		6
TGME49_289800	1.801	0.153511	3	2
TGME49_289830	0.167898	0.866353	10	7
TGME49_289880	-3.32909	0.00519568		4
TGME49_289970	-0.00399237	1	1	1
TGME49_290030	-7.05313	3.88034e-16		10
TGME49_290160	-4.34761	0.000176066		2
TGME49_290170	0.0779132	0.78233	1
TGME49_290180	-2.3899	0.0365181		2
TGME49_290200	-0.846907	0.0151803	12	11
TGME49_290290	-3.58236	0.00040998	1	4
TGME49_290460	-4.0846	1.4083e-12		8
TGME49_290600	-5.03958	1.93314e-10	3	11
TGME49_290630	-1.98967	0.78233		1
TGME49_290640	-1.76359	0.00390262		3
TGME49_290650	-1.39759	0.0131695		6
TGME49_290660	-0.91143	0.0222155	3	4
TGME49_290670	0.835048	0.00110712	21	22
TGME49_290720	1.60578	0.166054	1
TGME49_290730	1.1128	0.108956	3
TGME49_290840	-5.46875	2.04437e-22	2	15
TGME49_290880	-1.21827	0.0152068		3
TGME49_290900	-2.53761	0.295536		1
TGME49_290950	0.993606	1.18854e-07	52	41
TGME49_290980	-1.31559	0.166054	1	1
TGME49_291140	-0.435149	0.140643	6	8
TGME49_291180	-1.41933	6.69168e-16	30	44
TGME49_291350	-1.79182	2.98683e-06	2	6
TGME49_291680	0.480975	0.764395	11	8
TGME49_291800	-0.140193	1	1	1
TGME49_291820	1.50419	0.166054	4	2
TGME49_291850	2.47582	0.166054	2
TGME49_291890	0.346361	0.78233	1	1
TGME49_291930	-3.49812	1.07152e-07	1	8
TGME49_291950	-3.70938	0.000106353		5
TGME49_291960	2.07056	0.0883312	7	2
TGME49_291980	-1.02781	0.212842	1	2
TGME49_292020	1.04676	0.514841	2	1
TGME49_292035	-3.0227	1.0831e-10		12
TGME49_292080	-0.0665183	0.610945	29	26
TGME49_292130	0.208126	0.414178	7	9
TGME49_292190	-1.09388	0.00643518		2
TGME49_292200	-0.546254	0.166054	1	1
TGME49_292220	0.733516	0.480032	13	9
TGME49_292300	-2.99477	4.46317e-07		9
TGME49_292920	-7.16877	3.14327e-44	15	37
TGME49_292950	-0.499852	0.166054		2
TGME49_292975	-3.81978	1.87418e-30		32
TGME49_293000	0.689867	0.78233	1	1
TGME49_293060	1.31687	0.108956	5
TGME49_293180	-4.00878	1.73769e-13	1	15
TGME49_293230	0.082562	1		1
TGME49_293320	-0.869382	0.78233		1
TGME49_293330	-4.54053	6.59479e-31		27
TGME49_293350	2.36665	0.166054	1
TGME49_293430	-2.3341	0.166054		1
TGME49_293470	-3.20869	2.24617e-06		5
TGME49_293480	-1.76639	0.0446676	1	2
TGME49_293510	-2.9105	3.39609e-06	1	5
TGME49_293570	3.40593	0.212842	2	1
TGME49_293590	0.768015	0.187654	8	5
TGME49_293630	-2.42167	0.295536		1
TGME49_293660	-1.18285	0.0266127		3
TGME49_293690	0.186714	0.996454	2	1
TGME49_293730	-1.08017	0.281382	1	2
TGME49_293860	0.502389	0.166054	1	1
TGME49_293870	-2.8155	0.78233		1
TGME49_294010	-3.39408	0.166054		1
TGME49_294040	0.422441	0.514841	1	1
TGME49_294190	-2.4615	7.61349e-07	2	9
TGME49_294200	1.71078	4.39324e-08	23	17
TGME49_294250	1.71615	0.295536	1
TGME49_294310	-4.15057	0.166054		1
TGME49_294340	-0.401819	0.78233		1
TGME49_294350	-3.0272	0.000794808	2	5
TGME49_294360	-2.42388	0.00390262	1	3
TGME49_294550	1.03972	0.000294377	21	6
TGME49_294620	-1.16149	0.000546571	21	21
TGME49_294630	-0.453746	0.347275	1	2
TGME49_294670	-2.48096	1.96822e-05	7	10
TGME49_294710	-3.04131	7.87587e-06		4
TGME49_294750	-2.51706	0.0119741		2
TGME49_294770	1.50124	0.000546571	5	2
TGME49_294800	0.0377847	0.855076	18	19
TGME49_294812	-1.46165	0.166054		1
TGME49_294898	-4.74975	0.0119741		2
TGME49_294902	-2.83621	0.00390262		3
TGME49_294930	-1.36416	0.295536		1
TGME49_295080	-0.437396	1	1
TGME49_295110	3.29365	0.00166241	7	2
TGME49_295125	3.31906	0.00574081	4
TGME49_295350	-1.54382	0.78233		1
TGME49_295370	-3.07377	2.57049e-05		3
TGME49_295380	-3.76181	3.91138e-24	1	23
TGME49_295590	-3.43982	3.54361e-19		19
TGME49_295680	1.74155	0.514841	1
TGME49_295690	-3.37495	4.77468e-08		5
TGME49_295710	0.618644	0.452635	4	2
TGME49_295910	1.36282	0.514841	1
TGME49_296010	0.431444	0.564484	4	1
TGME49_297060	-5.73059	2.80589e-10	1	7
TGME49_297160	-4.70283	1.95976e-08		6
TGME49_297170	-2.00199	3.63198e-05		4
TGME49_297420	-3.74258	4.38678e-05		6
TGME49_297430	1.1096	1	1
TGME49_297470	0.387289	0.977127	10	8
TGME49_297500	-0.0875381	0.108956	6	6
TGME49_297530	-0.563279	0.78233		1
TGME49_297650	1.05272	0.514841	1	1
TGME49_297720	-4.88707	3.16881e-28	11	36
TGME49_297745	-4.5409	1.24227e-06	1	8
TGME49_297800	-0.898457	0.724889	1	1
TGME49_297810	-7.25448	1.17011e-18		13
TGME49_297890	-3.26145	1.58535e-11		9
TGME49_297940	-2.57982	0.0222155		2
TGME49_297970	-2.80249	0.0365181		2
TGME49_298020	-3.22619	0.00044427	1	6
TGME49_298030	-3.41324	6.44164e-14	1	15
TGME49_298610	-6.09938	2.59438e-37		34
TGME49_298630	-0.908865	0.090249	1	2
TGME49_298990	3.42971	1	1
TGME49_299050	2.39266	0.0129379	7	4
TGME49_299060	-0.682084	0.609822	1	1
TGME49_299070	-6.97414	9.75564e-37	3	30
TGME49_299110	-0.0584745	0.310258	8	9
TGME49_299210	-2.18063	7.39705e-05	4	9
TGME49_299780	-0.224792	0.892807	1	1
TGME49_299810	-3.4144	9.27322e-08		8
TGME49_299900	-5.15027	2.19547e-15		15
TGME49_300000	0.865619	0.199138	8	8
TGME49_300020	-1.39483	0.166054		1
TGME49_300030	-4.30531	9.56676e-23	1	21
TGME49_300060	2.89397	0.0205871	3	1
TGME49_300100	0.652003	0.0141557	10	8
TGME49_300120	-2.33308	0.000207589		6
TGME49_300140	-0.689304	0.122703	10	14
TGME49_300190	-0.1212	0.724889		2
TGME49_300260	-3.37068	2.28549e-15	9	18
TGME49_300280	-1.40047	0.166054		1
TGME49_300310	-1.50537	0.000850182	5	8
TGME49_300330	-1.74597	0.135748		2
TGME49_300380	-3.58599	0.295536		1
TGME49_300608	0.436333	0.78233	1
TGME49_300621	2.75313	0.166054	1
TGME49_300641	2.35905	0.00643518	2
TGME49_300650	2.01368	0.256587	3
TGME49_300680	0.52881	0.514841	1
TGME49_300700	-0.12877	0.78233	1
TGME49_301120	-3.28131	3.8739e-18	8	16
TGME49_301270	-1.09091	0.347275		2
TGME49_301440	-3.4288	3.11749e-12		9
TGME49_302000	1.94323	0.035446	3	1
TGME49_302050	2.17296	3.60992e-09	12	7
TGME49_304640	-4.62904	5.55983e-28		23
TGME49_304650	-2.40374	0.000592221	2	5
TGME49_304670	-1.59456	0.166054	1	1
TGME49_304710	0.845678	0.0106092	13	10
TGME49_304740	1.25877	0.000821555	6	4
TGME49_304900	0.128994	0.609822	2	1
TGME49_304955	-0.402173	0.78233	1	1
TGME49_304990	-1.9657	0.00455422	8	9
TGME49_305010	-1.36176	0.514841	1
TGME49_305040	-1.53487	0.295536	2	3
TGME49_305120	1.16042	0.166054	1	1
TGME49_305190	-3.63939	2.90477e-09		10
TGME49_305240	-0.081692	0.957798	3	3
TGME49_305290	0.102476	0.78233	2	1
TGME49_305340	-3.83146	7.26867e-29	5	35
TGME49_305450	-0.310581	0.166054	3	3
TGME49_305510	0.706442	0.610945	4	3
TGME49_305520	1.01899	0.0699848	11	12
TGME49_305610	-3.54299	2.48477e-13		8
TGME49_305770	0.379139	0.166054	1
TGME49_305780	-2.58667	0.166054		1
TGME49_305810	0.0037161	1		1
TGME49_305820	-0.613061	0.78233	1
TGME49_305850	-0.0805821	0.578648	11	9
TGME49_305860	-2.60294	0.035446	1	3
TGME49_305980	5.49872	0.0112723	3	1
TGME49_306020	-10.4003	0.166054		1
TGME49_306030	-0.452231	0.73853	8	7
TGME49_306060	1.56144	0.163887	15	10
TGME49_306210	0.794905	1	7	5
TGME49_306220	-7.48787	2.24788e-31	2	25
TGME49_306260	3.37476	0.166054	1
TGME49_306330	-1.03617	0.434427	1	2
TGME49_306400	-0.323846	0.996454	1	1
TGME49_306520	-1.59382	0.166054		1
TGME49_306600	-1.63953	0.295536		1
TGME49_306610	-0.00840537	1		1
TGME49_306650	-6.72755	7.55911e-13		7
TGME49_306660	-1.59201	0.00574081	1	4
TGME49_306670	-9.01253	1.22535e-16		7
TGME49_306950	0.00624706	1		1
TGME49_306960	-2.41245	1.60213e-12	4	8
TGME49_306970	0.90712	0.00129486	7	4
TGME49_307040	-3.20934	3.88293e-17	1	20
TGME49_307570	-3.86961	0.00024301	2	7
TGME49_307810	-3.51122	7.87587e-06		4
TGME49_307850	1.49716	0.0290225	9	7
TGME49_307980	-1.54338	0.0104068		4
TGME49_308000	0.0443787	0.856811	3	4
TGME49_308090	1.6318	0.0307461	12	9
TGME49_308580	-3.66805	7.16753e-30	5	31
TGME49_308840	0.215718	1	1	1
TGME49_308860	-1.80984	0.514841		1
TGME49_308890	-1.73823	0.000787054	2	7
TGME49_308920	3.71735	4.39435e-08	10	4
TGME49_308930	-2.54319	0.0597119		2
TGME49_308970	2.49758	0.166054	1
TGME49_309010	-4.68595	7.03413e-08		5
TGME49_309120	0.249153	0.350002	16	15
TGME49_309140	-2.28985	0.00643518		2
TGME49_309200	-0.451765	0.514841		1
TGME49_309210	-4.41337	0.00173331		3
TGME49_309250	-1.37236	0.514841		1
TGME49_309265	0.691035	0.514841	2	1
TGME49_309370	-1.32937	0.255911	3	3
TGME49_309390	-3.88983	0.00643518		2
TGME49_309570	-2.34637	0.21938	2	2
TGME49_309590	-0.607908	0.724889	2	1
TGME49_309600	1.9008	0.0137288	12	9
TGME49_309730	-4.80649	5.45788e-21		18
TGME49_309740	-0.604912	0.434427		2
TGME49_309752	-0.71884	0.000570197	21	20
TGME49_309760	-0.249819	1	1	1
TGME49_309790	-2.1163	0.514841		1
TGME49_309810	-2.35465	0.295536		1
TGME49_309820	2.66026	0.000433424	8	4
TGME49_310030	-1.07241	0.137663	3	6
TGME49_310070	-2.67658	0.166054		1
TGME49_310118	-4.35356	2.01347e-11	1	10
TGME49_310180	-3.41543	0.166054		1
TGME49_310200	-3.20807	0.514841		1
TGME49_310210	-0.0343857	0.892807	2	1
TGME49_310300	-5.00048	2.62052e-14	1	13
TGME49_310320	0.280858	1	1	1
TGME49_310360	-5.41847	7.19872e-09		5
TGME49_310370	1.27765	0.166054	1
TGME49_310420	-2.67965	0.166054		1
TGME49_310430	0.150779	0.514841	5	3
TGME49_310440	0.0972275	0.724889		1
TGME49_310460	0.580506	0.882548	4	5
TGME49_310470	-3.97889	0.000129276	1	3
TGME49_310490	0.491482	0.564484	4	3
TGME49_310500	-2.51954	0.090249		2
TGME49_310570	1.58226	0.78233	1
TGME49_310640	-3.69003	9.20037e-05	3	5
TGME49_310670	0.135476	0.12383	20	13
TGME49_310700	-0.370823	0.379583	2	3
TGME49_310710	-1.72747	0.000762457		3
TGME49_310750	0.0440831	0.78233	8	8
TGME49_310760	0.815932	0.514841	1	1
TGME49_310790	-3.59158	0.090249		2
TGME49_310820	-2.57436	0.514841		1
TGME49_310860	0.353337	0.78233	1
TGME49_311030	0.557936	0.767732	2	3
TGME49_311090	-0.814035	0.421477	2	2
TGME49_311150	-2.61802	0.00643518		2
TGME49_311230	-3.85169	7.63248e-17	10	25
TGME49_311240	-2.87368	4.28861e-05		4
TGME49_311290	1.81923	0.812691	2	2
TGME49_311310	-0.460949	0.557216	3	3
TGME49_311360	-0.419333	0.514841	6	8
TGME49_311400	-4.1785	6.7958e-20	1	18
TGME49_311430	-0.058504	1	8	9
TGME49_311470	-0.293024	0.281564	12	13
TGME49_311480	-4.54779	5.58395e-07		5
TGME49_311680	2.1525	0.00357602	3	1
TGME49_311720	0.82617	0.00754533	28	29
TGME49_311840	-1.08933	0.78233		1
TGME49_311860	-1.31545	0.295536		1
TGME49_311890	0.260423	0.672346	4	3
TGME49_312050	1.53844	0.000246862	8	7
TGME49_312090	0.400366	0.505659	7	8
TGME49_312100	1.46157	0.529056	4	2
TGME49_312110	-3.85211	0.166054		1
TGME49_312160	-7.53759	2.44664e-10		5
TGME49_312200	0.400334	0.325755	2	2
TGME49_312220	-0.0736755	0.609822	1	1
TGME49_312230	-1.90233	0.281382		2
TGME49_312270	0.649416	1	4	4
TGME49_312280	-1.74593	0.212842		2
TGME49_312330	-1.5424	0.0212021		3
TGME49_312370	-1.73719	0.212842	1	1
TGME49_312390	-2.34422	0.514841		1
TGME49_312430	-1.51551	0.166054		1
TGME49_312480	0.670315	0.286778	7	8
TGME49_312530	-2.14465	0.166054		1
TGME49_312600	-0.980439	0.514841	1
TGME49_312622	0.238426	1	2	2
TGME49_312630	0.297303	0.166054	38	35
TGME49_312990	-0.21548	0.926799	6	3
TGME49_313010	0.742597	0.00117454	20	15
TGME49_313070	-5.42737	8.64077e-07	3	6
TGME49_313080	-5.17164	0.00225386	1	6
TGME49_313100	0.533118	0.978551	6	5
TGME49_313140	-8.02965	4.95331e-46	9	29
TGME49_313190	-0.603751	0.514841	1	2
TGME49_313230	0.0641953	0.434427	8	8
TGME49_313240	-4.07793	1.8901e-09	5	12
TGME49_313270	-3.46801	3.18106e-13		11
TGME49_313370	-1.00355	0.000688793	2	4
TGME49_313380	-0.312118	0.740085	2	3
TGME49_313390	0.528327	0.934515	11	12
TGME49_313400	0.326593	0.586085	4	1
TGME49_313410	-1.10319	6.75076e-05	10	13
TGME49_313430	-0.0894531	0.892807	1	1
TGME49_313560	-1.73555	0.78233		1
TGME49_313630	-2.80983	0.295536		1
TGME49_313670	0.231588	0.14397	15	16
TGME49_313700	-4.19698	0.000176066	1	3
TGME49_313770	-3.85428	3.93904e-26		23
TGME49_313860	0.192143	1		1
TGME49_313910	-1.26147	0.281382	2	1
TGME49_313930	0.163735	0.472344	3	2
TGME49_313960	-4.53842	1.09676e-08	1	7
TGME49_313990	-1.77773	0.166054		1
TGME49_314070	-2.80576	0.78233		1
TGME49_314080	-0.590764	0.281382	2	1
TGME49_314100	2.02804	3.66388e-07	15	8
TGME49_314270	-2.15815	0.0014652		3
TGME49_314295	-3.94422	1.58979e-15		9
TGME49_314320	-2.37865	0.514841		1
TGME49_314400	-0.575902	0.0434833	9	10
TGME49_314410	-0.836585	0.00130406	4	6
TGME49_314430	0.494237	0.996454	1
TGME49_314680	-4.38216	0.00643518		2
TGME49_314690	-4.19262	1.44368e-06		5
TGME49_314750	-0.307535	0.78233		1
TGME49_314780	-1.95294	0.00578939	1	3
TGME49_314810	1.05382	0.83088	9	8
TGME49_314820	-3.55115	0.166054		1
TGME49_314955	-0.520951	0.379583		3
TGME49_314970	0.652629	1.34755e-05	19	15
TGME49_315140	-0.944805	0.347275	1	1
TGME49_315150	-0.848099	0.0651021	2	4
TGME49_315210	-0.23786	0.912574	4	3
TGME49_315220	1.14955	0.295536	5	5
TGME49_315230	-1.85145	5.60639e-05		5
TGME49_315250	-1.69731	0.166054		1
TGME49_315270	-3.40581	1.43524e-07		5
TGME49_315490	0.217655	0.78233	1
TGME49_315610	0.604524	0.876984	1	2
TGME49_315620	1.18502	0.272271	8	6
TGME49_315770	-0.0187487	1	6	3
TGME49_315810	0.552531	0.434427	2
TGME49_315860	-1.89652	5.32085e-07		7
TGME49_315930	-0.456842	0.876984	3	2
TGME49_315940	-1.09028	0.218205	1	2
TGME49_315958	-2.18576	0.0205871		3
TGME49_316120	-3.25041	0.000482476		4
TGME49_316255	-5.77656	7.87587e-06		3
TGME49_316330	-4.02448	0.0597119		2
TGME49_316400	0.533862	0.0567059	11	10
TGME49_316480	-2.70767	0.295536		1
TGME49_316540	-0.0326291	0.996454	2	1
TGME49_316570	-3.51932	1.53083e-07	1	8
TGME49_316610	-2.70332	1.15511e-05		8
TGME49_316730	-4.19718	1.06422e-17		21
TGME49_316900	-5.99596	4.63492e-11		10
TGME49_317720	0.9519	0.0291592	15	7
TGME49_318140	-3.26703	0.0119741		1
TGME49_318160	-1.89935	0.514841		1
TGME49_318170	-3.35983	1.17837e-08		4
TGME49_318230	0.44162	0.873204	3	3
TGME49_318260	1.73356	0.78233		1
TGME49_318310	-0.502025	0.166054		1
TGME49_318400	-4.27369	6.30949e-23		21
TGME49_318410	0.662107	0.496788	19	17
TGME49_318430	-3.54226	2.12955e-11		10
TGME49_318440	-0.265908	0.511468	25	30
TGME49_318460	-0.246539	1	1	1
TGME49_318510	0.6534	0.000277997	17	14
TGME49_318525	-0.903076	0.78233		1
TGME49_318560	-1.59064	5.08891e-05	5	10
TGME49_318580	-0.960206	0.140643	4	4
TGME49_318600	-0.581484	1		1
TGME49_318620	1.36209	0.295536		1
TGME49_318700	-2.13631	0.295536		1
TGME49_318710	-1.4655	5.1388e-08	17	20
TGME49_318720	-2.88236	0.166054		1
TGME49_319340	1.74353	0.0112723	3	1
TGME49_319530	0.250815	0.78233	1
TGME49_319540	-3.16118	0.00040998	1	4
TGME49_319550	0.200176	0.996454	3	3
TGME49_319560	-0.672803	0.514841	1	1
TGME49_319650	-1.49559	0.166054		1
TGME49_319850	0.128707	0.610945	4	2
TGME49_319870	-2.1627	0.090249	1	1
TGME49_319920	-7.75722	9.23086e-33	11	18
TGME49_320015	-2.92508	7.26619e-05		4
TGME49_320020	0.114652	1	10	9
TGME49_320050	1.14588	0.00110728	16	17
TGME49_320100	-0.918787	0.295536	3	3
TGME49_320140	-6.12091	1.69579e-07		4
TGME49_320160	-2.91525	0.000284122		4
TGME49_320220	-6.83323	1.49905e-22	5	14
TGME49_320440	-4.51683	0.514841		1
TGME49_320460	0.774827	0.281382	2
TGME49_320480	1.53534	0.848483	6	5
TGME49_320570	-2.86846	0.00040998		4
TGME49_320592	-1.90145	8.29824e-06		10
TGME49_320600	-5.23417	0.0222155		2
TGME49_320620	-2.49301	0.166054		1
TGME49_320640	-1.43444	0.166054		1
TGME49_320700	-2.67756	0.000176066		3
TGME49_320740	-4.43027	4.0915e-06		4
TGME49_321370	-4.32682	5.04517e-16		18
TGME49_321400	-2.04265	0.108956	1	3
TGME49_321440	0.00632926	1	1	2
TGME49_321450	1.47509	0.78233		1
TGME49_321500	-0.854436	0.291927	4	4
TGME49_321520	-1.39098	0.135748		2
TGME49_321530	1.53507	0.166054	1
TGME49_321590	1.38514	0.012414	3	3
TGME49_321620	-4.66617	1.18213e-26	1	22
TGME49_321640	2.18193	0.132951	3
TGME49_321680	-3.76346	2.64511e-06		5
TGME49_322210	-6.19123	0.00259565	1	2
TGME49_323100	0.0582813	1	1
TGME49_324800	-4.98759	0.166054		1
TGME49_355200	1.47497	0.166054	1

## Sheet: 4. Combined mtAPEX and mtBirA
combined mtAPEX and mtBirA*	annotation		overlap mitoAPEX and mitoBirA*	annotation		mtAPEX only	annotation		mitoBirA only	annotation
TGME49_201380	chorismate synthase, putative		TGME49_201800	hypothetical protein		TGME49_202960	glycine cleavage H-protein		TGME49_201380	chorismate synthase, putative
TGME49_201400	Sin3-associated polypeptide SAP18 (SAP18)		TGME49_202350	50S ribosomal protein L21, putative		TGME49_206480	hypothetical protein		TGME49_201400	Sin3-associated polypeptide SAP18 (SAP18)
TGME49_201800	hypothetical protein		TGME49_202630	ATP-dependent metallopeptidase HflB subfamily protein		TGME49_207620	pyridine nucleotide-disulfide oxidoreductase domain-containing protein		TGME49_201880	hypothetical protein
TGME49_201880	hypothetical protein		TGME49_202680	peptidase M16, alpha subunit, putative		TGME49_208790	MC family transporter, putative		TGME49_202240	RAP domain-containing protein
TGME49_202240	RAP domain-containing protein		TGME49_203520	hypothetical protein		TGME49_209010	elongation factor TS protein		TGME49_202720	RNB family domain-containing protein
TGME49_202350	50S ribosomal protein L21, putative		TGME49_203730	hypothetical protein		TGME49_209150	non-proton pumping type-II NADH dehydrogenase I (NDH2-I)		TGME49_203020	ribosome biogenesis GTPase Der protein
TGME49_202630	ATP-dependent metallopeptidase HflB subfamily protein		TGME49_204400	ATPase synthase subunit alpha, putative		TGME49_211090	aminotransferase, class V superfamily protein		TGME49_203220	DEAD/DEAH box helicase domain-containing protein
TGME49_202680	peptidase M16, alpha subunit, putative		TGME49_206470	pyruvate dehydrogenase complex subunit PDH-E3II (PDHE3II)		TGME49_214310	hypothetical protein		TGME49_203940	ABC1 protein
TGME49_202720	RNB family domain-containing protein		TGME49_207760	DnaJ C terminal region domain-containing protein		TGME49_214750	hypothetical protein		TGME49_204410	endonuclease/exonuclease/phosphatase family protein
TGME49_202960	glycine cleavage H-protein		TGME49_209260	cytochrome c oxidase subunit, putative		TGME49_216660	hypothetical protein		TGME49_204550	hypothetical protein
TGME49_203020	ribosome biogenesis GTPase Der protein		TGME49_210730	ATP-dependent hsl protease ATP-binding subunit hslU, putative		TGME49_219850	prolyl-tRNA synthetase (ProRS)		TGME49_205010	U2 small nuclear ribonucleoprotein family protein, putative
TGME49_203220	DEAD/DEAH box helicase domain-containing protein		TGME49_210750	Ferredoxin-fold anticodon binding domain-containing protein		TGME49_220100	phosphoribosylpyrophosphate synthetase		TGME49_205320	hypothetical protein
TGME49_203520	hypothetical protein		TGME49_210790	dihydroorotate dehydrogenase reveal, putative		TGME49_224090	enoyl-CoA hydratase/isomerase family protein		TGME49_205558	NAC domain-containing protein
TGME49_203730	hypothetical protein		TGME49_211690	AAA family protein		TGME49_225550	phosphatidylserine decarboxylase		TGME49_206500	hypothetical protein
TGME49_203940	ABC1 protein		TGME49_212930	NifU family domain-containing protein		TGME49_230520	cyclophilin 1, putative		TGME49_207170	hypothetical protein
TGME49_204400	ATPase synthase subunit alpha, putative		TGME49_213310	hypothetical protein		TGME49_230910	hypothetical protein		TGME49_207800	hypothetical protein
TGME49_204410	endonuclease/exonuclease/phosphatase family protein		TGME49_213420	RAP domain-containing protein		TGME49_231150	hypothetical protein		TGME49_208090	5-formyltetrahydrofolate cyclo-ligase
TGME49_204550	hypothetical protein		TGME49_214790	glycoprotein		TGME49_234190	serine hydroxymethyltransferase 2, putative		TGME49_209420	hypothetical protein
TGME49_205010	U2 small nuclear ribonucleoprotein family protein, putative		TGME49_215280	succinate dehydrogenase [ubiquinone] iron-sulfur protein		TGME49_237010	hypothetical protein		TGME49_209680	hypothetical protein
TGME49_205320	hypothetical protein		TGME49_215350	hypothetical protein		TGME49_237560	iron-sulfur cluster protein ISCU (ISCU)		TGME49_209870	HAD hydrolase, family IIA protein
TGME49_205558	NAC domain-containing protein		TGME49_215590	flavoprotein subunit of succinate dehydrogenase		TGME49_239490	dehydrogenase E1 component family protein		TGME49_209950	thioredoxin, putative
TGME49_206470	pyruvate dehydrogenase complex subunit PDH-E3II (PDHE3II)		TGME49_215710	hypothetical protein		TGME49_240670	adrenodoxin-type ferredoxin, putative		TGME49_211060	hypothetical protein
TGME49_206480	hypothetical protein		TGME49_216530	ribosome recycling factor protein		TGME49_246920	glutathione reductase		TGME49_211680	protein disulfide isomerase
TGME49_206500	hypothetical protein		TGME49_217020	ATPase, AFG1 family protein		TGME49_248320	carrier superfamily protein		TGME49_212260	Sjogren's syndrome/scleroderma autoantigen 1 (Autoantigen p27) protein
TGME49_207170	hypothetical protein		TGME49_218840	mutS domain protein (MSH1)		TGME49_248600	aspartate aminotransferase		TGME49_213600	hypothetical protein
TGME49_207620	pyridine nucleotide-disulfide oxidoreductase domain-containing protein		TGME49_219550	dihydrolipoyllysine-residue succinyltransferase component of oxoglutarate dehydrogenase		TGME49_249702	MC family transporter, putative		TGME49_214250	hypothetical protein
TGME49_207760	DnaJ C terminal region domain-containing protein		TGME49_219682	pyruvate dehydrogenase kinase, putative		TGME49_249900	adenine nucleotide translocator, putative		TGME49_214370	hypothetical protein
TGME49_207800	hypothetical protein		TGME49_221510	hypothetical protein		TGME49_249910	mitochondria-associated granulocyte macrophage CSF signaling molecule, putative		TGME49_214870	ribosomal protein L9, N-terminal domain-containing protein
TGME49_208090	5-formyltetrahydrofolate cyclo-ligase		TGME49_222210	SPFH domain / Band 7 family protein		TGME49_258100	TPR repeat region protein		TGME49_215020	hypothetical protein
TGME49_208790	MC family transporter, putative		TGME49_222910	phosphoglycerate mutase		TGME49_262380	elongation factor Tu, putative		TGME49_215610	hypothetical protein
TGME49_209010	elongation factor TS protein		TGME49_223500	hypothetical protein		TGME49_263730	FAD-dependent glycerol-3-phosphate dehydrogenase		TGME49_216010	ribosomal protein RPL24 (RPL24)
TGME49_209150	non-proton pumping type-II NADH dehydrogenase I (NDH2-I)		TGME49_224350	aminopeptidase N, putative		TGME49_265360	hypothetical protein		TGME49_216040	30S ribosomal protein S15, putative
TGME49_209260	cytochrome c oxidase subunit, putative		TGME49_224490	polyprenyl synthetase superfamily protein		TGME49_267775	hypothetical protein		TGME49_216600	exonuclease III APE (APE)
TGME49_209420	hypothetical protein		TGME49_225380	hypothetical protein		TGME49_269000	ABC transporter family protein		TGME49_216650	S15 sporozoite-expressed protein
TGME49_209680	hypothetical protein		TGME49_226590	cytochrome C oxidase subunit IIa, putative		TGME49_270120	thioredoxin-like protein TLP1 (TLP1)		TGME49_216670	FUSE-binding protein 2 / KH-type splicing regulatory protein (FUBP2)
TGME49_209870	HAD hydrolase, family IIA protein		TGME49_226730	aconitate hydratase ACN/IRP		TGME49_272230	heat shock protein hslv, putative		TGME49_216900	cytokine induced apoptosis inhibitor 1 family protein
TGME49_209950	thioredoxin, putative		TGME49_227830	mitochondrial inner membrane translocase TIM44, putative		TGME49_274060	2-oxoglutarate/malate translocase OMT (OMT)		TGME49_217890	alkyl hydroperoxide reductase/ Thiol specific antioxidant/ Mal allergen, putative
TGME49_210730	ATP-dependent hsl protease ATP-binding subunit hslU, putative		TGME49_227948	peptidase M16 inactive domain-containing protein		TGME49_278720	hypothetical protein		TGME49_218720	calcium-dependent protein kinase CDPK6 (CDPK6)
TGME49_210750	Ferredoxin-fold anticodon binding domain-containing protein		TGME49_227990	hypothetical protein		TGME49_278990	phosphate carrier, putative		TGME49_218790	elongation factor G C-terminus domain-containing protein
TGME49_210790	dihydroorotate dehydrogenase reveal, putative		TGME49_228250	elongation factor Tu GTP binding domain-containing protein		TGME49_281630	hydroxyacylglutathione hydrolase		TGME49_218940	hypothetical protein
TGME49_211060	hypothetical protein		TGME49_229920	hypothetical protein		TGME49_285750	6,7-dihydropteridine reductase		TGME49_219140	EF-1 guanine nucleotide exchange domain-containing protein
TGME49_211090	aminotransferase, class V superfamily protein		TGME49_230410	peroxiredoxin PRX3 (PRX3)		TGME49_286120	prolyl endopeptidase		TGME49_219310	DnaK family protein
TGME49_211680	protein disulfide isomerase		TGME49_231410	hypothetical protein		TGME49_288830	NADH dehydrogenase (NDH2-II)		TGME49_221430	hypothetical protein
TGME49_211690	AAA family protein		TGME49_231460	hypothetical protein		TGME49_289780	ATP-dependent hsl protease ATP-binding subunit hslU, putative		TGME49_222660	leucine rich repeat-containing protein
TGME49_212260	Sjogren's syndrome/scleroderma autoantigen 1 (Autoantigen p27) protein		TGME49_231910	ATP synthase F1 gamma subunit		TGME49_291350	hypothetical protein		TGME49_222952	phosphohistidine phosphatase
TGME49_212930	NifU family domain-containing protein		TGME49_232090	3-hydroxyacyl-CoA dehydrogenase, NAD binding domain-containing protein		TGME49_306970	thymidylate kinase		TGME49_222990	ribosomal protein S18, putative
TGME49_213310	hypothetical protein		TGME49_232540	FAD binding domain-containing protein		TGME49_309752	succinate-Coenzyme A ligase, beta subunit, putative		TGME49_223270	hypothetical protein
TGME49_213420	RAP domain-containing protein		TGME49_233890	hypothetical protein		TGME49_311150	hypothetical protein		TGME49_223660	50S ribosomal protein L4, putative
TGME49_213600	hypothetical protein		TGME49_233930	CAF1 family ribonuclease		TGME49_314400	pyruvate dehydrogenase E1 component, beta subunit, putative		TGME49_224730	hypothetical protein
TGME49_214250	hypothetical protein		TGME49_234420	ATPase, AAA family protein		TGME49_315930	integral membrane protein, DUF56 family protein, putative		TGME49_224910	divalent cation tolerance protein, CutA1 family protein
TGME49_214310	hypothetical protein		TGME49_236140	hypothetical protein		TGME49_316330	superoxide dismutase SOD2 (SOD2)		TGME49_225240	50S ribosomal protein L13, putative
TGME49_214370	hypothetical protein		TGME49_236210	peptidase M16 family potein, putative		TGME49_318560	ATPase/histidine kinase/DNA gyrase B/HSP90 domain-containing protein		TGME49_226220	alveolin domain containing intermediate filament IMC9 (ALV6)
TGME49_214750	hypothetical protein		TGME49_236510	hypothetical protein					TGME49_226280	ribosomal protein L28, putative
TGME49_214790	glycoprotein		TGME49_237470	glycine cleavage T-protein (aminomethyl transferase) domain-containing protein					TGME49_227360	ribosomal protein RPL3 (RPL3)
TGME49_214870	ribosomal protein L9, N-terminal domain-containing protein		TGME49_240830	hydrolase, alpha/beta fold family protein					TGME49_227400	hypothetical protein
TGME49_215020	hypothetical protein		TGME49_242460	mitochondrial carrier superfamily protein					TGME49_227910	hypothetical protein
TGME49_215280	succinate dehydrogenase [ubiquinone] iron-sulfur protein		TGME49_242840	membrane protein					TGME49_229340	hypothetical protein
TGME49_215350	hypothetical protein		TGME49_243490	BCS1 family isoform 9, putative					TGME49_229620	hypothetical protein
TGME49_215590	flavoprotein subunit of succinate dehydrogenase		TGME49_243580	Hit family protein involved in cell-cycle regulation, putative					TGME49_229740	hypothetical protein
TGME49_215610	hypothetical protein		TGME49_243730	rhoptry protein ROP9 (ROP9)					TGME49_229900	hypothetical protein
TGME49_215710	hypothetical protein		TGME49_244200	2-oxoglutarate dehydrogenase e1 component, mitochondrial precursor, putative					TGME49_229930	p25-alpha family protein
TGME49_216010	ribosomal protein RPL24 (RPL24)		TGME49_244870	quinone oxidoreductase, putative					TGME49_230050	50S ribosomal protein L3, putative
TGME49_216040	30S ribosomal protein S15, putative		TGME49_246540	cytochrome c1, heme protein					TGME49_230690	LNS2 (Lipin/Ned1/Smp2) protein
TGME49_216530	ribosome recycling factor protein		TGME49_247550	heat shock protein HSP60 (HSP60)					TGME49_231630	alveolin domain containing intermediate filament IMC4 (ALV4)
TGME49_216600	exonuclease III APE (APE)		TGME49_247770	hypothetical protein					TGME49_231750	hypothetical protein
TGME49_216650	S15 sporozoite-expressed protein		TGME49_249390	glutamate/leucine/phenylalanine/valine dehydrogenase family protein					TGME49_231850	serine-threonine phosophatase 2C (PP2C)
TGME49_216660	hypothetical protein		TGME49_249630	glutathione S-transferase, N-terminal domain-containing protein					TGME49_231970	pre-mRNA processing splicing factor PRP8 (PRP8)
TGME49_216670	FUSE-binding protein 2 / KH-type splicing regulatory protein (FUBP2)		TGME49_249690	hypothetical protein					TGME49_232340	protein phosphatase 2C domain-containing protein
TGME49_216900	cytokine induced apoptosis inhibitor 1 family protein		TGME49_251780	heat shock protein					TGME49_232440	Brf1p family coiled coil protein
TGME49_217020	ATPase, AFG1 family protein		TGME49_252630	hypothetical protein					TGME49_232600	phospholipase, patatin family protein
TGME49_217890	alkyl hydroperoxide reductase/ Thiol specific antioxidant/ Mal allergen, putative		TGME49_254030	zinc finger CDGSH-type domain-containing protein					TGME49_233680	nuclear movement family protein
TGME49_218720	calcium-dependent protein kinase CDPK6 (CDPK6)		TGME49_254410	protein phosphatase 2C, putative					TGME49_235340	hypothetical protein
TGME49_218790	elongation factor G C-terminus domain-containing protein		TGME49_257480	NADP-dependent succinate-semialdehyde dehydrogenase					TGME49_235398	hypothetical protein
TGME49_218840	mutS domain protein (MSH1)		TGME49_258000	hypothetical protein					TGME49_236000	ferredoxin, putative
TGME49_218940	hypothetical protein		TGME49_258650	protoheme ferro-lyase, putative					TGME49_236040	fructose-1,6-bisphosphate aldolase
TGME49_219140	EF-1 guanine nucleotide exchange domain-containing protein		TGME49_259710	protein kinase					TGME49_236110	autophagy-related protein 3 atg3, putative
TGME49_219310	DnaK family protein		TGME49_259850	hypothetical protein					TGME49_236250	regulator of chromosome condensation (RCC1) repeat-containing protein
TGME49_219550	dihydrolipoyllysine-residue succinyltransferase component of oxoglutarate dehydrogenase		TGME49_260170	elongation factor EF-G, putative					TGME49_236840	zinc finger (C-x8-C-x5-C-x3-H)-2, putative
TGME49_219682	pyruvate dehydrogenase kinase, putative		TGME49_260180	hypothetical protein					TGME49_237150	minor histocompatibility antigen h13, putative
TGME49_219850	prolyl-tRNA synthetase (ProRS)		TGME49_260790	RAP domain-containing protein					TGME49_238000	peptidyl-prolyl isomerase
TGME49_220100	phosphoribosylpyrophosphate synthetase		TGME49_261030	pyridine nucleotide-disulfide oxidoreductase domain-containing protein					TGME49_238040	protein disulfide-isomerase domain-containing protein
TGME49_221430	hypothetical protein		TGME49_261600	creatinase domain-containing protein					TGME49_239087	hypothetical protein
TGME49_221510	hypothetical protein		TGME49_261950	ATP synthase beta subunit ATP-B (ATPB)					TGME49_239720	50S ribosomal protein l24, putative
TGME49_222210	SPFH domain / Band 7 family protein		TGME49_262640	Cg8 family protein					TGME49_243530	pentatricopeptide repeat domain-containing protein
TGME49_222660	leucine rich repeat-containing protein		TGME49_263080	hypothetical protein					TGME49_243960	nuclear transport factor 2 (ntf2) domain-containing protein
TGME49_222910	phosphoglycerate mutase		TGME49_263530	chaperonin , putative					TGME49_244460	hypothetical protein
TGME49_222952	phosphohistidine phosphatase		TGME49_263750	hypothetical protein					TGME49_245490	microneme protein MIC8 (MIC8)
TGME49_222990	ribosomal protein S18, putative		TGME49_263840	hypothetical protein					TGME49_246060	DNA-dependent RNA polymerase (POLRMT)
TGME49_223270	hypothetical protein		TGME49_264040	hypothetical protein					TGME49_246530	phospholipase D active site domain-containing protein
TGME49_223500	hypothetical protein		TGME49_265220	co-chaperone GrpE protein					TGME49_247410	hypothetical protein
TGME49_223660	50S ribosomal protein L4, putative		TGME49_265370	hypothetical protein					TGME49_247450	hypothetical protein
TGME49_224090	enoyl-CoA hydratase/isomerase family protein		TGME49_266850	3-demethylubiquinone-9 3-O-methyltransferase					TGME49_248640	regulator of chromosome condensation (RCC1) repeat-containing protein
TGME49_224350	aminopeptidase N, putative		TGME49_267040	hypothetical protein					TGME49_249180	bifunctional dihydrofolate reductase-thymidylate synthase
TGME49_224490	polyprenyl synthetase superfamily protein		TGME49_267330	fumarate hydratase					TGME49_249730	hypothetical protein
TGME49_224730	hypothetical protein		TGME49_267560	folate-binding protein YgfZ protein					TGME49_250340	centrin 2
TGME49_224910	divalent cation tolerance protein, CutA1 family protein		TGME49_268260	hypothetical protein					TGME49_251890	hypothetical protein
TGME49_225240	50S ribosomal protein L13, putative		TGME49_268650	chaperone clpB protein, putative					TGME49_251950	ribosomal protein l7/l12 c-terminal domain-containing protein
TGME49_225380	hypothetical protein		TGME49_268830	hypothetical protein					TGME49_252290	importin alpha, putative
TGME49_225550	phosphatidylserine decarboxylase		TGME49_268890	citrate synthase I					TGME49_253800	ribosomal protein L15, putative
TGME49_226220	alveolin domain containing intermediate filament IMC9 (ALV6)		TGME49_270150	hypothetical protein					TGME49_254230	hypothetical protein
TGME49_226280	ribosomal protein L28, putative		TGME49_270800	GAF domain-containing protein					TGME49_254400	LSU ribosomal protein L2P, putative
TGME49_226590	cytochrome C oxidase subunit IIa, putative		TGME49_271110	hypothetical protein					TGME49_254530	hypothetical protein
TGME49_226730	aconitate hydratase ACN/IRP		TGME49_271820	lipoyltransferase and lipoate-protein ligase subfamily protein					TGME49_254800	hypothetical protein
TGME49_227360	ribosomal protein RPL3 (RPL3)		TGME49_272490	protoporphyrinogen oxidase					TGME49_254810	hypothetical protein
TGME49_227400	hypothetical protein		TGME49_272670	peptidase family M3 protein					TGME49_255170	hypothetical protein
TGME49_227830	mitochondrial inner membrane translocase TIM44, putative		TGME49_273885	hypothetical protein					TGME49_256760	pyruvate kinase PyK1 (PYKI)
TGME49_227910	hypothetical protein		TGME49_273930	DNA topoisomerase domain-containing protein					TGME49_257090	NAC domain-containing protein
TGME49_227948	peptidase M16 inactive domain-containing protein		TGME49_276210	phosphoglycerate mutase family protein					TGME49_257390	ribosome biogenesis GTP-binding protein YsxC protein
TGME49_227990	hypothetical protein		TGME49_278250	hypothetical protein					TGME49_257500	hypothetical protein
TGME49_228250	elongation factor Tu GTP binding domain-containing protein		TGME49_282040	hypothetical protein					TGME49_257560	WD domain, G-beta repeat-containing protein
TGME49_229340	hypothetical protein		TGME49_282180	hypothetical protein					TGME49_257730	methionine aminopeptidase, type i, putative
TGME49_229620	hypothetical protein		TGME49_283830	type I inorganic pyrophosphatase PPase					TGME49_259550	dihydropteroate synthase
TGME49_229740	hypothetical protein		TGME49_284540	ATP synthase F1, delta subunit protein					TGME49_260140	phosphomannose isomerase type I protein
TGME49_229900	hypothetical protein		TGME49_285840	RAP domain-containing protein					TGME49_260470	heat shock protein DNAJ pfj4, putative
TGME49_229920	hypothetical protein		TGME49_285970	30S ribosomal protein S5, putative					TGME49_260660	50S ribosomal protein L23, putative
TGME49_229930	p25-alpha family protein		TGME49_286260	tetratricopeptide repeat-containing protein					TGME49_260840	hypothetical protein
TGME49_230050	50S ribosomal protein L3, putative		TGME49_286530	hypothetical protein					TGME49_261510	hypothetical protein
TGME49_230410	peroxiredoxin PRX3 (PRX3)		TGME49_288400	LETM1 family protein					TGME49_262100	tetratricopeptide repeat-containing protein
TGME49_230520	cyclophilin 1, putative		TGME49_288500	FAD Malate-dehydrogenase (MDH-FAD)					TGME49_263090	14-3-3 protein
TGME49_230690	LNS2 (Lipin/Ned1/Smp2) protein		TGME49_288685	Fe-S protein assembly co-chaperone HscB protein					TGME49_263400	hypothetical protein
TGME49_230910	hypothetical protein		TGME49_288710	hypothetical protein					TGME49_263630	hypothetical protein
TGME49_231150	hypothetical protein		TGME49_288750	ubiquinol-cytochrome c reductase					TGME49_264160	DEAD/DEAH box helicase domain-containing protein
TGME49_231410	hypothetical protein		TGME49_289650	PEP-carboxykinase I					TGME49_264730	hypothetical protein
TGME49_231460	hypothetical protein		TGME49_290030	hypothetical protein					TGME49_265470	hypothetical protein
TGME49_231630	alveolin domain containing intermediate filament IMC4 (ALV4)		TGME49_290460	hypothetical protein					TGME49_266260	hypothetical protein
TGME49_231750	hypothetical protein		TGME49_290600	succinyl-CoA-synthetase alpha SCSA (SCSA)					TGME49_266640	Acetyl-coenzyme A synthetase 2, putative
TGME49_231850	serine-threonine phosophatase 2C (PP2C)		TGME49_290840	serine protease					TGME49_266840	hypothetical protein
TGME49_231910	ATP synthase F1 gamma subunit		TGME49_292300	DNA-directed RNA polymerase III RPC8 (POLR3H)					TGME49_267800	dynamin-related protein DRPA (DRPA)
TGME49_231970	pre-mRNA processing splicing factor PRP8 (PRP8)		TGME49_292920	heat shock protein 75, putative					TGME49_268290	DEAD/DEAH box helicase domain-containing protein
TGME49_232090	3-hydroxyacyl-CoA dehydrogenase, NAD binding domain-containing protein		TGME49_292975	hypothetical protein					TGME49_269180	MIF4G domain-containing protein
TGME49_232340	protein phosphatase 2C domain-containing protein		TGME49_293330	hypothetical protein					TGME49_269800	glutamine-dependent NAD(+) synthetase protein, putative
TGME49_232440	Brf1p family coiled coil protein		TGME49_295370	hypothetical protein					TGME49_270090	hypothetical protein
TGME49_232540	FAD binding domain-containing protein		TGME49_295690	ubiquinone/menaquinone biosynthesis methyltransferase subfamily protein					TGME49_270770	PWI domain-containing protein
TGME49_232600	phospholipase, patatin family protein		TGME49_297160	hypothetical protein					TGME49_272030	kelch repeat-containing protein
TGME49_233680	nuclear movement family protein		TGME49_297810	hypothetical protein					TGME49_273100	3'-5' exonuclease domain-containing protein
TGME49_233890	hypothetical protein		TGME49_297890	hypothetical protein					TGME49_273370	coatomer gamma 2-subunit protein, putative
TGME49_233930	CAF1 family ribonuclease		TGME49_298030	Ubiquinol-cytochrome c chaperone, putative					TGME49_275650	hypothetical protein
TGME49_234190	serine hydroxymethyltransferase 2, putative		TGME49_299070	pyruvate kinase PyKII (PYKII)					TGME49_277700	ribosomal protein S14 precursor, putative
TGME49_234420	ATPase, AAA family protein		TGME49_300030	hypothetical protein					TGME49_277840	Ras family protein
TGME49_235340	hypothetical protein		TGME49_300260	threonyl-tRNA synthetase family protein					TGME49_277870	hypothetical protein
TGME49_235398	hypothetical protein		TGME49_301120	acetyl-CoA acetyltransferase					TGME49_278220	hypothetical protein
TGME49_236000	ferredoxin, putative		TGME49_304640	hypothetical protein					TGME49_278660	P-type ATPase4, putative
TGME49_236040	fructose-1,6-bisphosphate aldolase		TGME49_306650	hypothetical protein					TGME49_281370	polynucleotide adenylyltransferase
TGME49_236110	autophagy-related protein 3 atg3, putative		TGME49_306670	hypothetical protein					TGME49_283850	peptidyl-prolyl cis-trans isomerase
TGME49_236140	hypothetical protein		TGME49_308580	Lon protease family protein					TGME49_284040	hypothetical protein
TGME49_236210	peptidase M16 family potein, putative		TGME49_309730	thioredoxin reductase					TGME49_285268	DnaJ domain-containing protein
TGME49_236250	regulator of chromosome condensation (RCC1) repeat-containing protein		TGME49_310118	hypothetical protein					TGME49_285272	hypothetical protein
TGME49_236510	hypothetical protein		TGME49_310300	hypothetical protein					TGME49_285680	dihydrolipoamide acyltransferase, putative
TGME49_236840	zinc finger (C-x8-C-x5-C-x3-H)-2, putative		TGME49_312160	hypothetical protein					TGME49_286410	hypothetical protein
TGME49_237010	hypothetical protein		TGME49_313070	hypothetical protein					TGME49_286580	hypothetical protein
TGME49_237150	minor histocompatibility antigen h13, putative		TGME49_313140	isocitrate dehydrogenase					TGME49_286750	MA3 domain-containing protein
TGME49_237470	glycine cleavage T-protein (aminomethyl transferase) domain-containing protein		TGME49_313240	ethylene-responsive RNA helicase, putative					TGME49_289140	ribosomal protein l22/l43, putative
TGME49_237560	iron-sulfur cluster protein ISCU (ISCU)		TGME49_313770	hypothetical protein					TGME49_289330	ubiquitin carboxyl-terminal hydrolase family 2 protein
TGME49_238000	peptidyl-prolyl isomerase		TGME49_313960	ribosomal protein L19 protein					TGME49_290160	sortilin, putative
TGME49_238040	protein disulfide-isomerase domain-containing protein		TGME49_314690	hypothetical protein					TGME49_290290	ubiquitin-activating enzyme E1 family protein
TGME49_239087	hypothetical protein		TGME49_318170	hypothetical protein					TGME49_291930	RNA recognition motif-containing protein
TGME49_239490	dehydrogenase E1 component family protein		TGME49_318400	hypothetical protein					TGME49_291950	RNA recognition motif-containing protein
TGME49_239720	50S ribosomal protein l24, putative		TGME49_318430	malate dehydrogenase MDH (MDH)					TGME49_292035	hypothetical protein
TGME49_240670	adrenodoxin-type ferredoxin, putative		TGME49_319920	2-oxo acid dehydrogenases acyltransferase (catalytic domain) domain-containing protein					TGME49_293180	NADP-specific glutamate dehydrogenase
TGME49_240830	hydrolase, alpha/beta fold family protein		TGME49_320220	ubiquinol cytochrome c oxidoreductase, putative					TGME49_293470	hypothetical protein
TGME49_242460	mitochondrial carrier superfamily protein		TGME49_321370	hypothetical protein					TGME49_293510	poly(ADP-ribose) polymerase and DNA-Ligase Zn-finger region domain-containing protein
TGME49_242840	membrane protein								TGME49_294350	DEAD/DEAH box helicase domain-containing protein
TGME49_243490	BCS1 family isoform 9, putative								TGME49_294710	RNA recognition motif-containing protein
TGME49_243530	pentatricopeptide repeat domain-containing protein								TGME49_295380	hypothetical protein
TGME49_243580	Hit family protein involved in cell-cycle regulation, putative								TGME49_295590	hypothetical protein
TGME49_243730	rhoptry protein ROP9 (ROP9)								TGME49_297060	phosphoglycerate mutase PGMII (PGMII)
TGME49_243960	nuclear transport factor 2 (ntf2) domain-containing protein								TGME49_297420	beta-tubulin cofactor D, putative
TGME49_244200	2-oxoglutarate dehydrogenase e1 component, mitochondrial precursor, putative								TGME49_297720	trehalose-phosphatase
TGME49_244460	hypothetical protein								TGME49_297745	hypothetical protein
TGME49_244870	quinone oxidoreductase, putative								TGME49_298020	DEAD-family helicase
TGME49_245490	microneme protein MIC8 (MIC8)								TGME49_298610	GYF domain-containing protein
TGME49_246060	DNA-dependent RNA polymerase (POLRMT)								TGME49_299810	cysteine-tRNA synthetase (CysRS)
TGME49_246530	phospholipase D active site domain-containing protein								TGME49_299900	hypothetical protein
TGME49_246540	cytochrome c1, heme protein								TGME49_301440	calcium-dependent protein kinase CDPK1 (CDPK1)
TGME49_246920	glutathione reductase								TGME49_305190	CorA family Mg2+ transporter protein
TGME49_247410	hypothetical protein								TGME49_305340	corepressor complex CRC230 (CRC230)
TGME49_247450	hypothetical protein								TGME49_305610	hypothetical protein
TGME49_247550	heat shock protein HSP60 (HSP60)								TGME49_306220	hypothetical protein
TGME49_247770	hypothetical protein								TGME49_307040	shikimate dehydrogenase substrate binding domain-containing protein
TGME49_248320	carrier superfamily protein								TGME49_307570	glycerol-3-phosphate dehydrogenase (gpdh), putative
TGME49_248600	aspartate aminotransferase								TGME49_307810	hypothetical protein
TGME49_248640	regulator of chromosome condensation (RCC1) repeat-containing protein								TGME49_309010	elongation factor P, putative
TGME49_249180	bifunctional dihydrofolate reductase-thymidylate synthase								TGME49_310360	hypothetical protein
TGME49_249390	glutamate/leucine/phenylalanine/valine dehydrogenase family protein								TGME49_310470	cytochrome C oxidase subunit IIb, putative
TGME49_249630	glutathione S-transferase, N-terminal domain-containing protein								TGME49_310640	phosphorylase family protein
TGME49_249690	hypothetical protein								TGME49_311230	hypothetical protein
TGME49_249702	MC family transporter, putative								TGME49_311240	DnaJ family chaperone, putative
TGME49_249730	hypothetical protein								TGME49_311400	WD domain, G-beta repeat-containing protein
TGME49_249900	adenine nucleotide translocator, putative								TGME49_311480	hypothetical protein
TGME49_249910	mitochondria-associated granulocyte macrophage CSF signaling molecule, putative								TGME49_313270	hypothetical protein
TGME49_250340	centrin 2								TGME49_313700	hypothetical protein
TGME49_251780	heat shock protein								TGME49_314295	ribosomal l25 family protein
TGME49_251890	hypothetical protein								TGME49_315270	hypothetical protein
TGME49_251950	ribosomal protein l7/l12 c-terminal domain-containing protein								TGME49_316120	hypothetical protein
TGME49_252290	importin alpha, putative								TGME49_316255	hypothetical protein
TGME49_252630	hypothetical protein								TGME49_316570	hypothetical protein
TGME49_253800	ribosomal protein L15, putative								TGME49_316610	hypothetical protein
TGME49_254030	zinc finger CDGSH-type domain-containing protein								TGME49_316730	Sma protein
TGME49_254230	hypothetical protein								TGME49_316900	Sas10 C-terminal domain-containing protein
TGME49_254400	LSU ribosomal protein L2P, putative								TGME49_319540	hypothetical protein
TGME49_254410	protein phosphatase 2C, putative								TGME49_320015	hypothetical protein
TGME49_254530	hypothetical protein								TGME49_320140	ubiquinol-cytochrome c reductase hinge protein, putative
TGME49_254800	hypothetical protein								TGME49_320160	hypothetical protein
TGME49_254810	hypothetical protein								TGME49_320570	elongation factor Tu, putative
TGME49_255170	hypothetical protein								TGME49_320700	AP2 domain transcription factor AP2IV-1 (AP2IV1)
TGME49_256760	pyruvate kinase PyK1 (PYKI)								TGME49_320740	hypothetical protein
TGME49_257090	NAC domain-containing protein								TGME49_321620	dynamin-related protein DRPB (DRPB)
TGME49_257390	ribosome biogenesis GTP-binding protein YsxC protein								TGME49_321680	hypothetical protein
TGME49_257480	NADP-dependent succinate-semialdehyde dehydrogenase
TGME49_257500	hypothetical protein
TGME49_257560	WD domain, G-beta repeat-containing protein
TGME49_257730	methionine aminopeptidase, type i, putative
TGME49_258000	hypothetical protein
TGME49_258100	TPR repeat region protein
TGME49_258650	protoheme ferro-lyase, putative
TGME49_259550	dihydropteroate synthase
TGME49_259710	protein kinase
TGME49_259850	hypothetical protein
TGME49_260140	phosphomannose isomerase type I protein
TGME49_260170	elongation factor EF-G, putative
TGME49_260180	hypothetical protein
TGME49_260470	heat shock protein DNAJ pfj4, putative
TGME49_260660	50S ribosomal protein L23, putative
TGME49_260790	RAP domain-containing protein
TGME49_260840	hypothetical protein
TGME49_261030	pyridine nucleotide-disulfide oxidoreductase domain-containing protein
TGME49_261510	hypothetical protein
TGME49_261600	creatinase domain-containing protein
TGME49_261950	ATP synthase beta subunit ATP-B (ATPB)
TGME49_262100	tetratricopeptide repeat-containing protein
TGME49_262380	elongation factor Tu, putative
TGME49_262640	Cg8 family protein
TGME49_263080	hypothetical protein
TGME49_263090	14-3-3 protein
TGME49_263400	hypothetical protein
TGME49_263530	chaperonin , putative
TGME49_263630	hypothetical protein
TGME49_263730	FAD-dependent glycerol-3-phosphate dehydrogenase
TGME49_263750	hypothetical protein
TGME49_263840	hypothetical protein
TGME49_264040	hypothetical protein
TGME49_264160	DEAD/DEAH box helicase domain-containing protein
TGME49_264730	hypothetical protein
TGME49_265220	co-chaperone GrpE protein
TGME49_265360	hypothetical protein
TGME49_265370	hypothetical protein
TGME49_265470	hypothetical protein
TGME49_266260	hypothetical protein
TGME49_266640	Acetyl-coenzyme A synthetase 2, putative
TGME49_266840	hypothetical protein
TGME49_266850	3-demethylubiquinone-9 3-O-methyltransferase
TGME49_267040	hypothetical protein
TGME49_267330	fumarate hydratase
TGME49_267560	folate-binding protein YgfZ protein
TGME49_267775	hypothetical protein
TGME49_267800	dynamin-related protein DRPA (DRPA)
TGME49_268260	hypothetical protein
TGME49_268290	DEAD/DEAH box helicase domain-containing protein
TGME49_268650	chaperone clpB protein, putative
TGME49_268830	hypothetical protein
TGME49_268890	citrate synthase I
TGME49_269000	ABC transporter family protein
TGME49_269180	MIF4G domain-containing protein
TGME49_269800	glutamine-dependent NAD(+) synthetase protein, putative
TGME49_270090	hypothetical protein
TGME49_270120	thioredoxin-like protein TLP1 (TLP1)
TGME49_270150	hypothetical protein
TGME49_270770	PWI domain-containing protein
TGME49_270800	GAF domain-containing protein
TGME49_271110	hypothetical protein
TGME49_271820	lipoyltransferase and lipoate-protein ligase subfamily protein
TGME49_272030	kelch repeat-containing protein
TGME49_272230	heat shock protein hslv, putative
TGME49_272490	protoporphyrinogen oxidase
TGME49_272670	peptidase family M3 protein
TGME49_273100	3'-5' exonuclease domain-containing protein
TGME49_273370	coatomer gamma 2-subunit protein, putative
TGME49_273885	hypothetical protein
TGME49_273930	DNA topoisomerase domain-containing protein
TGME49_274060	2-oxoglutarate/malate translocase OMT (OMT)
TGME49_275650	hypothetical protein
TGME49_276210	phosphoglycerate mutase family protein
TGME49_277700	ribosomal protein S14 precursor, putative
TGME49_277840	Ras family protein
TGME49_277870	hypothetical protein
TGME49_278220	hypothetical protein
TGME49_278250	hypothetical protein
TGME49_278660	P-type ATPase4, putative
TGME49_278720	hypothetical protein
TGME49_278990	phosphate carrier, putative
TGME49_281370	polynucleotide adenylyltransferase
TGME49_281630	hydroxyacylglutathione hydrolase
TGME49_282040	hypothetical protein
TGME49_282180	hypothetical protein
TGME49_283830	type I inorganic pyrophosphatase PPase
TGME49_283850	peptidyl-prolyl cis-trans isomerase
TGME49_284040	hypothetical protein
TGME49_284540	ATP synthase F1, delta subunit protein
TGME49_285268	DnaJ domain-containing protein
TGME49_285272	hypothetical protein
TGME49_285680	dihydrolipoamide acyltransferase, putative
TGME49_285750	6,7-dihydropteridine reductase
TGME49_285840	RAP domain-containing protein
TGME49_285970	30S ribosomal protein S5, putative
TGME49_286120	prolyl endopeptidase
TGME49_286260	tetratricopeptide repeat-containing protein
TGME49_286410	hypothetical protein
TGME49_286530	hypothetical protein
TGME49_286580	hypothetical protein
TGME49_286750	MA3 domain-containing protein
TGME49_288400	LETM1 family protein
TGME49_288500	FAD Malate-dehydrogenase (MDH-FAD)
TGME49_288685	Fe-S protein assembly co-chaperone HscB protein
TGME49_288710	hypothetical protein
TGME49_288750	ubiquinol-cytochrome c reductase
TGME49_288830	NADH dehydrogenase (NDH2-II)
TGME49_289140	ribosomal protein l22/l43, putative
TGME49_289330	ubiquitin carboxyl-terminal hydrolase family 2 protein
TGME49_289650	PEP-carboxykinase I
TGME49_289780	ATP-dependent hsl protease ATP-binding subunit hslU, putative
TGME49_290030	hypothetical protein
TGME49_290160	sortilin, putative
TGME49_290290	ubiquitin-activating enzyme E1 family protein
TGME49_290460	hypothetical protein
TGME49_290600	succinyl-CoA-synthetase alpha SCSA (SCSA)
TGME49_290840	serine protease
TGME49_291350	hypothetical protein
TGME49_291930	RNA recognition motif-containing protein
TGME49_291950	RNA recognition motif-containing protein
TGME49_292035	hypothetical protein
TGME49_292300	DNA-directed RNA polymerase III RPC8 (POLR3H)
TGME49_292920	heat shock protein 75, putative
TGME49_292975	hypothetical protein
TGME49_293180	NADP-specific glutamate dehydrogenase
TGME49_293330	hypothetical protein
TGME49_293470	hypothetical protein
TGME49_293510	poly(ADP-ribose) polymerase and DNA-Ligase Zn-finger region domain-containing protein
TGME49_294350	DEAD/DEAH box helicase domain-containing protein
TGME49_294710	RNA recognition motif-containing protein
TGME49_295370	hypothetical protein
TGME49_295380	hypothetical protein
TGME49_295590	hypothetical protein
TGME49_295690	ubiquinone/menaquinone biosynthesis methyltransferase subfamily protein
TGME49_297060	phosphoglycerate mutase PGMII (PGMII)
TGME49_297160	hypothetical protein
TGME49_297420	beta-tubulin cofactor D, putative
TGME49_297720	trehalose-phosphatase
TGME49_297745	hypothetical protein
TGME49_297810	hypothetical protein
TGME49_297890	hypothetical protein
TGME49_298020	DEAD-family helicase
TGME49_298030	Ubiquinol-cytochrome c chaperone, putative
TGME49_298610	GYF domain-containing protein
TGME49_299070	pyruvate kinase PyKII (PYKII)
TGME49_299810	cysteine-tRNA synthetase (CysRS)
TGME49_299900	hypothetical protein
TGME49_300030	hypothetical protein
TGME49_300260	threonyl-tRNA synthetase family protein
TGME49_301120	acetyl-CoA acetyltransferase
TGME49_301440	calcium-dependent protein kinase CDPK1 (CDPK1)
TGME49_304640	hypothetical protein
TGME49_305190	CorA family Mg2+ transporter protein
TGME49_305340	corepressor complex CRC230 (CRC230)
TGME49_305610	hypothetical protein
TGME49_306220	hypothetical protein
TGME49_306650	hypothetical protein
TGME49_306670	hypothetical protein
TGME49_306970	thymidylate kinase
TGME49_307040	shikimate dehydrogenase substrate binding domain-containing protein
TGME49_307570	glycerol-3-phosphate dehydrogenase (gpdh), putative
TGME49_307810	hypothetical protein
TGME49_308580	Lon protease family protein
TGME49_309010	elongation factor P, putative
TGME49_309730	thioredoxin reductase
TGME49_309752	succinate-Coenzyme A ligase, beta subunit, putative
TGME49_310118	hypothetical protein
TGME49_310300	hypothetical protein
TGME49_310360	hypothetical protein
TGME49_310470	cytochrome C oxidase subunit IIb, putative
TGME49_310640	phosphorylase family protein
TGME49_311150	hypothetical protein
TGME49_311230	hypothetical protein
TGME49_311240	DnaJ family chaperone, putative
TGME49_311400	WD domain, G-beta repeat-containing protein
TGME49_311480	hypothetical protein
TGME49_312160	hypothetical protein
TGME49_313070	hypothetical protein
TGME49_313140	isocitrate dehydrogenase
TGME49_313240	ethylene-responsive RNA helicase, putative
TGME49_313270	hypothetical protein
TGME49_313700	hypothetical protein
TGME49_313770	hypothetical protein
TGME49_313960	ribosomal protein L19 protein
TGME49_314295	ribosomal l25 family protein
TGME49_314400	pyruvate dehydrogenase E1 component, beta subunit, putative
TGME49_314690	hypothetical protein
TGME49_315270	hypothetical protein
TGME49_315930	integral membrane protein, DUF56 family protein, putative
TGME49_316120	hypothetical protein
TGME49_316255	hypothetical protein
TGME49_316330	superoxide dismutase SOD2 (SOD2)
TGME49_316570	hypothetical protein
TGME49_316610	hypothetical protein
TGME49_316730	Sma protein
TGME49_316900	Sas10 C-terminal domain-containing protein
TGME49_318170	hypothetical protein
TGME49_318400	hypothetical protein
TGME49_318430	malate dehydrogenase MDH (MDH)
TGME49_318560	ATPase/histidine kinase/DNA gyrase B/HSP90 domain-containing protein
TGME49_319540	hypothetical protein
TGME49_319920	2-oxo acid dehydrogenases acyltransferase (catalytic domain) domain-containing protein
TGME49_320015	hypothetical protein
TGME49_320140	ubiquinol-cytochrome c reductase hinge protein, putative
TGME49_320160	hypothetical protein
TGME49_320220	ubiquinol cytochrome c oxidoreductase, putative
TGME49_320570	elongation factor Tu, putative
TGME49_320700	AP2 domain transcription factor AP2IV-1 (AP2IV1)
TGME49_320740	hypothetical protein
TGME49_321370	hypothetical protein
TGME49_321620	dynamin-related protein DRPB (DRPB)
TGME49_321680	hypothetical protein

## Sheet: 5. Annotated Protein List
gene ID	annotation	Proteome	hypothetical/unknown function	Mean Phenotype Score (Sidik et al, 2016)	molecular mass (Da)	TM domains	amino acid sequence	MitoFates prediction (fungi)	MitoProt prediction	orthologue group	Plasmodium falciparum	Cryptosporidium parvum	Babesia bovis	Vitrella brassicaformis	Saccharomyces cerevisiae	Sc mito proteome	Mitochondrial role in yeast
TGME49_201380	chorismate synthase, putative	BirA	N	-2.84106	58105	0	MSSYGAALRIHTFGESHGSAVGCIIDGLPPRLPLSVEDVQPQLNRRRPGQGPLSTQRREK DRVNILSGVEDGYTLGTPLAMLVWNEDRRPQDYHALATVPRPGHGDFTYHAKYHIHAKSG GGRSSARETLARVAAGAVVEKWLGMHYGTSFTAWVCQVGDVSVPRSLRRKWERQPPTRQD VDRLGVVRVSPDGTTFLDANNRLYDERGEELVEEEDKARRRLLFGVDNPTPGETVIETRC PCPSTAVRMAVKINQTRSLGDSIGGCISGAIVRPPLGLGEPCFDKVEAELAKAMMSLPAT KGFEIGQGFASVTLRGSEHNDRFIPFERASCSFSESAASTSKHERDGCSAATLSRERASD GRTTSRHEEEVERGRERIQRDTLHVTGVDQQNG…	0	0.009	OG5_128304	PF3D7_0623000 (1e-131)/(8e-129)	no	no	Vbra_7642 (2e-112)/(1e-112)	YGL148W	No
TGME49_201400	Sin3-associated polypeptide SAP18 (SAP18)	BirA	Y	-1.52175	97206	0	MARHRSRSPRKEGDNGEERRMSRSASSRRRRSPSPRVSKRKTSGASASNKRRAEKEKRSRSTSSRRHRSKQRRTEKRASASPRPGSEGAENALQKKEKSKASFRAVAPPKGLSSRSGRHRTSSRSPEDKVRDGVKDATHKPWLRKSEEDEKPKKARRAATPRASPRRELSRSPSPGDAVGSRRKPSRSGKSRTKANKGGSESPRRERSRSHSRLRTDKKEARRESPEGRRPRRRRRRGAHSPRRSLSPSRSRSLRLPRPSPSIQREPRRNPRSRGGGGRSNRRHSKSRSVSRSRSDFSPYPNWRFLPGRNGARHASPHGPGAMDSRRGRSANEEFLAALPPDHPFASRMPPKHSTTPLLPPLSRTPAELRRGLHPLFDPRSGPGAFWGSGDRGRPTGAD…	0.011	0.2686	OG5_130274	PF3D7_0711400 (1e-24)/(7e-25)	no	no	Vbra_20655 (9e-32)/(6e-34)	no	N/A
TGME49_201800	hypothetical protein	BirA	Y	-4.00704	28528	0	MALNRVPSRVLPFAVSGVYVHPRNACRLPAAAAVSSVPSSVSAFSSRTNFLSRSSSAVMS HPCAATARHFSFAIPPANAAALADPLPATPTPPPVFEAVSSASSGIASGTNALKNVEEVS TMERYEAAVYEESFKKPIVCLFFARFSLQSKVLLQPFLDFAASASNNATFFLIDCDRVPR AAYHARVENVPSLVVMKGDDAFRQTITDSVGVKTAGDLIQEARSALDQVLRLDQQEGGTK LQPGVSSYTHHIGVDNLNVYRKGWPVA	0.062	0.842	OG5_171233	no	no	BBOV_III005120 (1e-08)/(9e-10)	Vbra_14980 (5e-16)/(9e-22)	no	N/A
TGME49_201880	hypothetical protein	Both	Y	-3.68337	15270	0	MHFSGVFLRTSRVFLASESSAAGSKVAKSLPGIRFGNPWRDDYPEWIWKSLRVSRKDKDM FAPFFKLLNATKLYEYCLKDNRRYCMFVMGVGLVSSWMWSEWWNSVWRRINKGKLYNDVP YVYPEEDE	0.632	0.8127	OG5_153610	PF3D7_0622600 (2e-32)/(6e-34)	no	no	Vbra_943 (6e-17)/(3e-18)	no	N/A
TGME49_202240	RAP domain-containing protein	BirA	Y	-4.53678	199659	0	MQVRTAGVCRCRPGSARGTPAPLPPVSFTDAASSPVRKPPTGTNPSADCLHGLVFPFSRA GAETVRGHSLLQTNQADKTGRVYNGKDTHVSWFRPFSTRGHLHGASQKSSTRSAPNDRRK SASRINVAVDRLTSNIHDISDMSPHVLTTATTAAAKRGMKGHWAACVSRAFGLRRGLSVR DAALLFTATARMHAQDARFLDMLADVLLTKFRKVQEQQALQEQLQEQQQRQRRRDSLRAE SPLPASRSRPQSHTLSPDSPGLPDSGSQVCPSPASPGSFTECSSQLRSASAPSSPLPVAA TSSRLPPAASPPSFPVIHPAMSLPSESRAAAFSPFAIYSVAVACASLRYFNEELLTALAT GATHVPLSAFNGFDLVGLLAAFASLNFVPPPAF…	0.057	0.3921	OG5_239907	no	no	no	no	no	N/A
TGME49_202350	50S ribosomal protein L21, putative	Both	N	-5.06759	77283	0	MLARGSPWRLVLPGRSAKRAPETPPITRCRPGLVCERRKAECLRRTVSSAEEGMTKFSEK GASQTRMHQGNCDANHDSCADPRSAAEGSLCFFRSFAPSSGPLSPFKYLFRRPRSVNALS SSALTSPSHLCFSSCFSSCAASTCRSSPFSLLRSSRLLRQSVSEHSVPSLLSLSKPESLR SSVVSSRESSSRLGDEYPSAASYPHVRRQTSCLLNSQNSVYDLESWRRSSGTASDLLRTV PKGPLPRHNGGTSFSSASLLHSIISPSPSFGCVFLRRLQIYPQRRVIGHRIEIFRGKHRR RRMVPPRIPLHPLAANTSEETASKDMNLFETYRDLQLRWKKTCRQRKKKFNIARKWRMPR NIRPLPDPSWTLVFHVNPRSGYRRGRGVCRDRR…	0.791	0.7488	OG5_127445	PF3D7_1422100 (3e-58)/(2e-73)	no	BBOV_III009380 (2e-58)/(4e-59)	Vbra_6818 (1e-71)/(9e-68)	no	N/A
TGME49_202630	ATP-dependent metallopeptidase HflB subfamily protein	Both	Y	-3.33169	128445	2	MRALTLLHRGGSRSVAASPTLFSLGSSSPCVLRSYTSRPHCLSSASSASARTDSREVPSR YAWPPRTHHVSDRHSDEQRVGCLLSRIQTDGVSHRRSMVENLARSSVLSLPPALAFPSQR LSSQRLSSPRLSASLSLLSCASPSSSCRSPARPALHAGASMPRSFSVLSSISPEAKQGVD RAAAVAVPLAASSRSSSVLASLDDQTSSVCGRCPGHSPLPAIFSPDGSLHTLGPRCFPRL LQLLRGHLHLPAPTHAARLSAHAATVPGTSLVGALDSVMFSRPPVGFENFYPQRSAKAVR SQRQAAEADANAKRKEGEKREETPAKRTGLFGQQVEGGEGQQGSQVPPQRQGSRGSEEKP EDAIPDPPPVRLRLYGKAGQGRSDAQRERERLG…	0.844	0.9695	OG5_126616	PF3D7_1119600 (0.0)/(0.0)	cgd1_3360 (0.0)/(0.0)	BBOV_III005230 (0.0)/(0.0)	Vbra_5565 (0.0)/(0.0)	YER017C, YMR089C, YPR024W	Yes	Mitochondrial inner membrane m-AAA protease component;mediates degradation of misfolded or unassembled proteins;also required for correct assembly of mitochondrial enzyme complexes;involved in cytoplasmic mRNA translation and aging;expression of human homolog AFG3L2 can complement yeast yta12 afg3 double mutant
TGME49_202680	peptidase M16, alpha subunit, putative	Both	N	-4.29705	62204	0	MNASILFRRNAPGVSTCLRRRCLRPAALAAASASGVSTPASGVWTPAFQRTEKRFLSGAA LQPKAGPAPEYRRVPFVKEDMEKVMEEVPEFKYYYVGKENTKGNVYEGIPLDQSILEPAD LRDYVPPHSNIQYSKLDNGLRIASMDRGGLTASLGLFVHAGTRFEDVTNFGVTHMIQNLA FASTAHLSLLRTVKTIEVLGANAGCVVGREHLVYSAECLRSHMPLLVPMLTGNVLFPRFL PWELKACKEKLIMARKRLEHMPDQMVSELLHTTAWHNNTLGHKLHCTERSLGHYNPDVIR HYMLQHFSPENMVFVGVNVNHDELCTWLMRAFVDYNAIPPSKRTVASPVYTGGDVRLETP SPHAHMAIAFETPGGWNGGDLVAYSVLQTILGG…	0.972	0.9986	OG5_127941	PF3D7_0523100 (9e-154)/(3e-156)	cgd7_2080 (1e-59)/(3e-63)	BBOV_III003850 (6e-179)/(5e-180)	Vbra_10338 (0.0)/(0.0)	YHR024C	Yes	Alpha subunit of the mitochondrial processing protease (MPP);essential processing enzyme that cleaves the N-terminal targeting sequences from mitochondrially imported proteins
TGME49_202720	RNB family domain-containing protein	BirA	Y	-4.26442	258866	0	MKTLMSKLPSGCGRSSPTHSHSALWIRASSPHLRRPSNSGPGRLPLSSTSPLSVAAPAIS AASLEPQAPCSRRFFCGFASAENSPFSAAAHVLHRLSQPQTRRLSAPPGRGKDLCGSPDL FFFTRRVYSSARRAASPQAPSRLPRRRASESPSLAATSRRHEKPPKGRLANAPLSLSPSR HAPKVSSAGASSTKRQPVSTVVPVSAVSSPQPGWPQTPQPGWPQTPQPGWPQTPQPGWPQ TPQPGWRPCTRLSPSGSEAPQGHAGFVRRPSPPLRPTGSAGRPPWADSPQRPAHRSRVSF QFPSFSPSSPPSPFPPATPSPRPVPSFALSAPPRVFPPAFPPFPPPPSALSAGPPCFAHP SASSPPPSPPHSPPASLSPVSPPSQPFAPRGFR…	0.056	0.999	OG5_239896	no	no	no	no	no	N/A
TGME49_202960	glycine cleavage H-protein	APEX	N	-2.7463	32454	0	MRPCSPSGQFLIMRRAFARPGFPHSPFPPFHLACIPVQPGNTIRGRLLRHTPRVLSRGFS DGQLIGHCLLASSSRPSGCRVFSSLASASSVVAPNHLGVYYSKTHEYVRLTLDCPPTQEE SCTTSAASPEVVASETPKSSERVLFGVVGISAYAAEELGEVVYVDFPERLAQAGSRSAEM RKDERARAGEEDASVKKGSAVCSLESVKSVAEVYSPVDGLVVEVNEKVREQPSLVFQDPE GQGWLLKLRLPQAEAEEGGVEKSASALVAKVTKRLMDEERYATFVEREKNAGALEDCDQ	0.452	0.997	OG5_127169	no	no	no	Vbra_5481 (1e-16)/(3e-18)	YAL044C	Yes	H subunit of the mitochondrial glycine decarboxylase complex;glycine decarboxylase is required for the catabolism of glycine to 5,10-methylene-THF;also required for all protein lipoylation;expression is regulated by levels of 5,10-methylene-THF
TGME49_203020	ribosome biogenesis GTPase Der protein	BirA	N	-4.22941	123612	0	MSGAEKRGARLGATSSSLWLAPIRYFDYLGRFNTSKIVSSSPRFSCLRCLLSVSHSVSRARPLALLSASQKHCLCPSLPASRFSHDPSSVSCSLCRNDLSKGGGSVKFEFPPRRQTPLHPSSSASPSVRTSSTVSSAVRYTPAPLVRLSSCSPLDTASFSSLCVSPSSKLSDGVQGPLHRQLGNSASRPLRWISSASRLLSYNAVGPFAVHPLPRFSLTRYLSSSRRRSSDALSRIHPKLQRAPDLSVHPLKVVLVGRPNVGKSSLFNRLISGTRGNSTSSPFARLKRLQQAIVSPQAGTSRDRKEARAVFGGLQLLLVDTGGLEDTETTEACELLINMRKQVRFALKDADCVLFLIDATEGVTPVDILLSRLLNDWLDEQQRIDTAKQAKVMLRIPPE…	0.017	0.8389	OG5_128684	PF3D7_0313500 (5e-29)/(4e-29)	cgd8_3930 (0.033)/(0.028)	BBOV_IV007760 (3e-29)/(8e-28)	Vbra_22967 ( 1e-123)/(5e-123) and Vbra_296 (8e-05)/(1e-04)	no	N/A
TGME49_203220	DEAD/DEAH box helicase domain-containing protein	BirA	Y	-4.44532	122545	0	MEHFFLQKGADEEERRPKLSLLGDPEPAAPPPVPDADEEDPLEAYMHQISEQIQVEDAAI RERQEREAVEKEAGRDASGTAQQTDASCGRYIDDDDPLADSYAYVLEQRQKEAEAQAANL LKSRRKKARGGDSDDDGEEGDVRGTKQLASVDHSILVYPEFQRDIYKEAADIGSLSHEAV GELRASLQIRITGLNAPRPIASFLHLKDSLSKALFTGINKRGFTLPTPIQSAAIPCLMRG RDVLGLAETGSGKTAAYLIPLLARLQHLKEEERWPKRHVVYADNRPDPVGASLRAGGPAA IVLCPTRELAVQIDGEVHSLLAKAKAGASPLPLKHVLLAGGFDKGEQFKSLKAGVDLAVA NPGRLIDLATMKGLEDALKWVVMVVVDEADKMV…	0	0.0389	OG5_239882	no	no	no	no	no	N/A
TGME49_203520	hypothetical protein	Both	Y	-1.24962	221637	0	MASASKDVFASARHSRRRVRCSRTRSASCPGPHPPRLSPLVLPCSSESSSEWSAPFPRRH SKMPTFVFSKNSTSSFLTSLKTRACKTYSPSAPPVGNLADTSSQTNDGAVSSSPPAGLSH CCTPAVHQSFRPSPSLSPSLSSSLSRFPTASASSTLASLPFLVHSVSSRPFSLSRLASSI RETKQSVPSDAVDPNRSKSGRGRCACKHDASFWSGSAHDKRQVACLETGYLGTGQDPLEM HAGCIQTKSSFFLRCGSPTRCRSLPYDNSSAVSSAVSSCSRRLSSFSSDLVWPSPFALAP TLPLPSCVRTSAPSSVCSSSFSDSPPCSSFALRPCPSRAFSSRPSLPPMSTATPCSLSFG SLRFLASQSSASPSEGDRGRGDSAHRIAGDTRD…	0.565	0.8768	OG5_239873	no	no	no	no	no	N/A
TGME49_203730	hypothetical protein	Both	Y	-2.34757	133260	0	MRRLVPCRGCASYGNHPTSFGRRLLPSLPTQCFAVGSSPAPPLRDHQRTVSCLCRSPTVW SDEDSTGPGFSVSQIGKKVRLPIQASPVSSGFPVLSPVAANGGSQSPRASKHCVARVSWR FVSSSSHRRHGLSASEAATPVSSGSQAAKPSPSSDPLFPSLSSPSYVPCASSWMPSFAVR PRPEFSPLPGMNSSVLPTSPLPPPVSSSSPSPLFTSSSPSAAYSGPSFPSSPAHAVHSSS SSAASPRPPPSHLVVPVASMSAQHASGPPPPPVFPCPPPVPHFPPSASHAASVGPEAGQH PQATTVSRGTPSRAILSPPVHTTRVGSPWSPAGGSRPSLRPTPPPPTHPVAPSLPFYSYR YHPPPEYDEPTSEASTCFHTSLESNGSLYLSGT…	0.118	0.9203	OG5_239867	PF3D7_1314000 (2e-12)/(7e-17)	no	no	Vbra_7794 (2e-26)/(6e-28)	no	N/A
TGME49_203940	ABC1 protein	BirA	N	-4.19794	151017	0	MDASRRALCGRLTSSSLRCGIRIPRKVPSPALRTTVGSPTRVFTSGCTYTWTLEWRRGVH YHSSSPQACTRSKHSIRSQNRRCAPRWEVAHGSNTAAPVRQRPQVFRVFGHSLHLYFMRQ MPIELFVQSVARCKHTARQNGESENDTDRSQDRQAQFSSSGTARNPPSSALIDSDTHASV PEASLTPLIGASALGINSHQTGFCANSGAAASTVSSGACGSQSAVAATNSETFAIQGRVS SSGAEAVKQRTEVETFREGSSDGPATANLLAQSGRAKALDDTHIRSALLSGSARDSSPVD SRVSLSPSLRSVPPLSSSLSWGSASPGVPHDSLSRPSSSPSARSPRPGSFLSSFFPSAAS PPLFVSPSLSVLSPALLHSAGLTLLSSVTALTP…	0.165	0.9982	OG5_127778	PF3D7_0810200 (6e-96)/(2e-95)	cgd8_3250 (2e-73)/(4e-74)	BBOV_IV000470 (3e-92)/(1e-95)	Vbra_12589 (2e-111)/(4e-113)	YGL119W	Yes	ATPase required for ubiquinone biosynthesis and respiratory growth;maintains levels of CoQ biosynthetic proteins;binds to CoQ biosynthesis intermediates;UbiB protein kinase-like family member that lacks canonical protein kinase activity;similar to prokaryotic proteins involved in ubiquinone biosynthesis;human homolog ADCK3 complements a coq8 null, is associated with CoQ and respiratory-chain defi…
TGME49_204400	ATPase synthase subunit alpha, putative	Both	N	-3.8386	62147	0	MTIHSCLARRAVSVAASGARAFASGLGARAVAVGALQSARLLHTSSLRAAGAKISPSEMS RLLEERIAGWKTQTSTEEVGRVVSVGDGIARLFGLEGVQAGELVEFQNGMTGMALNLETD NVGVVIFGDDRSVLEGDSVKRTGRIVDVPIGPGLLGRVVDALGNPIDGKGPIPAKERRRV ELKAPGIIPRKSVHEPMMTGLKCVDALVPVGRGQRELIIGDRQTGKTAVAVDAIINQKEI NDSTDDESKKLYCIYVAVGQKRSTVAQIVKALEQRDAMKYTTVVAATASEAAPLQFLAPY SGCAMGEWFRDSGRHCVIIYDDLSKQATAYRQMSLLLRRPPGREAYPGDVFYLHSRLLER AAKMGDKSGGGSLTALPVIETQAGDVSAYIPTN…	0.995	0.9668	OG5_127165	PF3D7_0217100 (0.0)/(0.0)	cgd6_610 (0.0)/(0.0)	BBOV_III002130 (0.0)/(0.0)	Vbra_12983 (0.0)/(0.0)	YBL099W	Yes	Alpha subunit of the F1 sector of mitochondrial F1F0 ATP synthase;which is a large, evolutionarily conserved enzyme complex required for ATP synthesis;F1 translationally regulates ATP6 and ATP8 expression to achieve a balanced output of ATP synthase genes encoded in nucleus and mitochondria;phosphorylated;N-terminally propionylated in vivo
TGME49_204410	endonuclease/exonuclease/phosphatase family protein	BirA	Y	-0.48749	121576	0	MAWWPAFLRCSSCSKVLLPPLLCFVRFPFAAPLLACLSRGCSLAAASPPPLVRSGAACRY TRAVGRPASALLRGFPAAPPLLRVSAATPLSSPAAQYRRDSFSLASDISPFCESGLLFPP PPSSVLSTTLACSLASASLRCSSRPRCAPPSPVFHSSSPPLSLLSLPSPLAPLSALVSPS AASASLSRSSAAVAGLAPPVMTSSSLGRWLRRAFSSSVLPPTLASPDGSPPARPAAAAAS MPPTSSPSPGSCDSPRLSATASMLRNSAACDAAGEPSGSRAASASIRRAATLQGNDGSGG GESQPTGEGEREPERGQATLTRAESAKGQKRQRETKLLREESTRPPTPEAVAAVHSHAPP SESTSASSPISPSLSPSPQFGGKNLFCQLDASR…	0.04	0.9998	OG5_146307	no	no	BBOV_I003520 (1e-28)/(2e-29)	no	no	N/A
TGME49_204550	hypothetical protein	BirA	Y	-5.22559	103136	0	MSLSHTVAHLRRPGSLRHLQICQEIGCVGIADATPASSSLQLSLSRIRNNGKPNKPLLFA SGGRLASVRNSEEKVMQGSSSLVCKRETLGPANRGGRSIATLVERSLEKHKDRLFDCGAS GQPVTYKEVAEHARSISETLKAAAAYLHVPLTLPSALGRAGADGQARHTATSTEDCTGSA STLKCRGKPLNRPTIGLIVPPNSVAILAHLVGVWQCGGVGLLLPFPDPACLPFVADSTAA AAASAANAAVLFAKGGKTLHTYRPDALFQGNTGPSVYAKTVNPNSLPFLNSQNNAHNRNG VAQLWEYQAAESRCHLLVVTPEVAPMAAEVASKLSIPICVLRTSWVRKSDGTNGAEEQRA PERDLWSVRGRNKLEVKAYVPEVFHDSSRTSRN…	0.06	0.4798	OG5_239842	PF3D7_1009300 (7e-12)/(5e-13)	no	no	Vbra_22143 (9e-06)/(6e-07)	no	N/A
TGME49_205010	U2 small nuclear ribonucleoprotein family protein, putative	BirA	Y	-4.96544	150784	0	MENNGSSGKNQPSSTAAATDSAGVAFDSHIYGETPAAHYVTEIDAETPLVAQDGGSGSAVSRASRSGQRSTEDGARIAERERMLMAQQGDGVEATGVDKSIAAREDFYRRQRFQRALSPERADPFSDGDLGAASRGESARTYADVMLEQHLDREKQAAVRQIRKLQEDAELQRQLQMQKQLGGGDGSEKKRRRWDWGTAGAEDEGLTEAERQELARAKAQGGGKSEEGAAAAAAALVSRWDTPLHAGGQTPGAWGETPLVAGSDSREGAGARTGLGAAPGKKKSRWDATPTIGGTGQETPTPGQWGATPAVDQAGTPILAGAGSVTPMAPGAGSGNVTPMIAPGSQTPSMGRKRSRWDATPVLGGSDADMAAAAAAGLTPGASTPMTGGAGMTPGKDGS…	0	0.0014	OG5_127822	PF3D7_0308900 (0.0)/(0.0)	cgd6_4750 (0.0)/(0.0)	BBOV_IV006950 (0.0)/(0.0)	Vbra_6085 (0.0)/(0.0)	YMR288W	No
TGME49_205320	hypothetical protein	BirA	Y	0.852115	70850	0	MAATVLATETQPRSTSEVSTEGEALPGARMAAVVSEESIQKVLREDDAGPSDSAPAAAWDKSEELEIEDNSETTSPQEGKGSEHEGGADAPAAEAEAKGVKGGKIGAGRDEACSSTERRKETHRDKETESATDAGTTVAPSDTQSNAHVPEKRKDLGADKREESSAGATVVTPEVGEPSGTKVDISRETCQKPVGSQVASDSLDTKSREAGDEERGSSQEQQRRKVSPLKDAETQEAPADSQRTTNPHSPSLDLRGEVEITESGETAEADQDTDIRAATEATDKSRATSSGEKTTAATGEKKLRRKKKEKKTVFESIPEPSKAHTGCRAPPLARKDSQTVFVSEPVSQSVAHFRACEKAPEKQHLQTVFESQRAEKSTAHARAGEKLADRKDGRTVFES…	0	0.0687	OG5_141752	PF3D7_0723300 (8e-52)/(4e-51)	cgd3_3900 (2e-23)/(2e-22)	BBOV_IV009490 (9e-12)/(3e-11)	Vbra_21560 (4e-10)/(2e-15)	no	N/A
TGME49_205558	NAC domain-containing protein	BirA	Y	-3.67605	20507	0	MTAVEERKHLSASSVDSESDEECPKLEEVNQEEDAGTPEGRSKQSRNEKKARKAVLRHGMKHMPGIVRVMIRKSKHILFVVPKPDVYKSLASDTYVIFGEAKIEDLNSQAHSAAAQRFTQAANAQFPANGAATAADSKEAEGEVDETGVDPKDVDLVMSQVECSRARAVAALKANNNDIVEAIMDLSGN	0	0.0065	OG5_127180	PF3D7_0621800 (9e-31)/(2e-30)	cgd5_3450 (3e-27)/(3e-32)	BBOV_III009510 (5e-36)/(9e-36)	Vbra_5172 (5e-42)/(2e-56)	YHR193C	No
TGME49_206470	pyruvate dehydrogenase complex subunit PDH-E3II (PDHE3II)	Both	N	-3.22753	55122	0	MKAAVFRNLAVAWRPAGSSPLLSQKNQGLSFSLLPSAVQRRGFASAGGKYDVVVVGGGPG GYVAAIKAAQLGLKTACVEKRGTLGGTCLNVGCIPSKAVLNISNKYVDARDHFERLGIKI DGLSIDIDKMQKQKQKVVSTLTQGIEHLFRRNGVDYYVGEGKLTDSNSVEVTPNGKSEKQ RLDAGHIILATGSEASPLPGNVVPIDEKVIISSTGALALDKVPKRMAVIGGGVIGLELGS VWRNLGAEVTVVEFLDRLLPPVDGEVAKAFQKEMEKTGIKFQLGTKVVGADVRESSATLH VEPAKGGNPFEMEADVVLVAVGRRPYTKNLGLEELGIETDRVGRVVVDDRFCVPNYPNIR AIGDLIRGPMLAHKAEEEGIACVEMIAGVGEGH…	0.928	0.6583	OG5_126968	PF3D7_1232200 (1e-109)/(2e-115)	no	BBOV_IV007190 (3e-172)/(1e-160)	Vbra_17014 (0.0)/(0.0)	YFL018C	Yes	Dihydrolipoamide dehydrogenase;the lipoamide dehydrogenase component (E3) of the pyruvate dehydrogenase and 2-oxoglutarate dehydrogenase multi-enzyme complexes;PDH complex is concentrated in spots within the mitochondrial matrix, often near the ERMES complex and near peroxisomes;LPD1 has a paralog, IRC15, that arose from the whole genome duplication
TGME49_206480	hypothetical protein	APEX	Y	-1.79658	22522	0	MAFSGLAAMASPPAATRAQLVSRRFLSGRLACPSAVSLTSGAPFSFAGAGPFSRCSILTR NPAASPSCLSIQTRFLGNRATGPQFDILDPKSINLREEARYVCRLFSVPTLNYLDFKQGC SSLRVFLFLAMMAGISLDLLLFHPPKSSYWNRFHLHRLPLNAERLLFPGKGNVYEYTKNG TKVDPDTGAVATEACASFLKLMYGVSL	0.538	0.9552	OG5_150556	PF3D7_0213200 (1e-10)/(9e-12)	no	BBOV_II006550 (6e-13)/(5e-14)	Vbra_13079 (9e-12)/(7e-13) | Vbra_13117 (7e-12)/(5e-13)	no	N/A
TGME49_206500	hypothetical protein	BirA	Y	-4.13589	146186	0	MLTYGRDPQRERSTAKTKSPTFHTRVAGCMQPHAAPDRRTAEASTQESLRFLRSPFSTTSWSRQSHLFVRPPASSDFSRRLMAGLAKPRGRLAGVAAASQAVRGAAFTLFLSVRKGLEPVLVRELRTSPSLRDLCGSCDASSGKLPRSDERKGAFCGEKLDASPEKKRPIRLQSVQGGVVLHNADWELATRVCTYSRIAETVWLRLAHSGACTTEQRLENALTKVKWKEFFPDLSLLPLVPLRVASFSSTLCNENRIRQVVEKTLKSLGAEHKSEAAGQGNVDSLENNSAFSSPLSSSPSMSPSSASLPSSASPEIEFVKAVQPARRLLEALNFRFSLTLASDSLFVDMQLSPRLTPRPYLYLSRFFSPSCAGFSASTSLPSPLSSSPPSPLSSSLSAS…	0.045	0.0432	OG5_240618	PF3D7_1226000 (3e-20)/(2e-20)	no	BBOV_III010750 (2e-06)/(7e-07)	Vbra_3979 (6e-16)/(2e-16)	no	N/A
TGME49_207170	hypothetical protein	BirA	Y	-3.44318	15232	1	MATHNCLRQTAAQMLGQNANVFRFFSKSAPSRPSGNVALESVKNAAVAETETFAGRANVA AGTGKLEGSLLPPPHIPGIRRAPREPASPKMAGMEGRMPVRLPPEGSRFRQYVDPRADVY FPLTAVLVTLGPLYMFSKAFF	0.616	0.9769	OG5_240910	PF3D7_1326000 (0.025)/(0.003)	no	BBOV_III005260 (4.4)/(0.46)	no	no	N/A
TGME49_207620	pyridine nucleotide-disulfide oxidoreductase domain-containing protein	APEX	Y	-1.14866	71159	0	MASLRSQAWRRVAQRAFSHLSSSSPLLSSGLQGLPVAVSVSPTQTREQKSERMFWTKGLC AAALAAGAVSVAVGEGNSRTEGRKLGGSPVFSRAFGRCPRVAACAEKRTATDLGAAEDFQ RGGLYELAVNGGKDKVLLSRTADGTFYCTGASCSHYSASLSKGVLTAKRTVTCPLHDAEF DLETGKCVNGPALSAIPTYPVEIKDGRVVAQIPDEVPVRARGVYAKEKRGQNTETFVLVG GGAAAATAAETLRAEGFDGRIVMICEESVPPYDRPVLTKNLNAKLDNILLRPLKALQEDL GVQVLLNSRAVGVDLKTKTVRLEGNAPDVKFDKLLLCTGSEARRLTGLPNGTARGIFTVR GKNDLQELSAFLEENKKFNSDPRVAIIGSSFVG…	0.998	0.9984	OG5_126784	PF3D7_0720400 ( 7e-101)/(1e-95)	no	BBOV_III001680 (2e-97)/(4e-98)	Vbra_7852 (6e-148)/(2e-143) | Vbra_9410 (1e-147)/(8e-148)	no	N/A
TGME49_207760	DnaJ C terminal region domain-containing protein	Both	Y	-3.4118	161646	0	MRSPNLAAAPAHPAAETPGGGAPPPAPAGPAARPDGSRVSVRRAPVSAVPRRRAETVSPL LSLLAFSSTRRGLLLRSHPRLSATQRVLGEALKAVSNDVAVAPSRRRPCLRARRREKRQS QDAEEGRQGRWSGSRGAVAFWRGRERDRVSRATQGTSVLPSRFLSSLTPPRLLSVKPAVS PPTRGGLRRLYSTVSPPAALFFPPRPRRPLLSCSRPQATANQRASLSSASTLWSVATASS FPVSRSWLRFRTPRAGASQSFSGEGRAESSDLGLTDWSASPRRVQGNLAFFSRQVCSSKA LRLRRDQVVLEALNPRWRTASLPARAPAEVAVVSRHLGCGASSDSERMCRKLQKLRFSSS ARRVASNRSRAFRGRDSRGECGHASPVLGSFFS…	0	0.4442	OG5_126952	PF3D7_0409400 (7e-143)/(3e-134)	cgd2_1330 (3e-64)/(5e-61)	BBOV_III010470 (1e-132)/(1e-122)	Vbra_15608 (2e-132)/(2e-125)	YFL016C	Yes	Co-chaperone that stimulates HSP70 protein Ssc1p ATPase activity;involved in protein folding/refolding in the mitochodrial matrix;required for proteolysis of misfolded proteins;member of the HSP40 (DnaJ) family of chaperones
TGME49_207800	hypothetical protein	BirA	Y	-3.969	48351	0	MMRRLASPSLRRLQEGQTPHSMRKSAVADARKKIFGYACGMPGEEQWVRPLQGRQMMKWY WPSKYMLQDVQMAQYFQMQAMRFAPRPAHVSLTTLSATMEQCWKKRDAVRAFFQSIDEKV LRENPTLQDLYGLYRTLCPDDPLRTPVDPALWRDPGFTWQHTADQRIVSSSTNREQQGDP SEPAMATRRVAQEQATDKRHISPANINDDVAALLFSRTEQSGAIRNVCAASPYLHGGKNN RSRDRFHNGAREANSSEEDSLEQPKSLILDTESRGTALSRSRTQECLLALSALAETGLGQ SASELIQQPVVLRVDIGLGDREPVQDTTAFRKKQEQSRRTLQAALDHDERLARYHGAKHR FFDPLFRRRRLSFLDRFARERIKGEKARQLGAQ…	0.859	0.706	OG5_147457	PF3D7_1242500 (8e-23)/(8e-42)	no	BBOV_III001130 (3e-19)/(2e-20)	Vbra_8892 (3e-39)/(2e-40)	no	N/A
TGME49_208090	5-formyltetrahydrofolate cyclo-ligase	BirA	N	-3.0267	51606	0	MFSWAALRTSTAFTLHSPQGVCFLLYERARFLPLAVAFSPPTDVSRSGCPLSFPFVATMA FSAKAVLGASLSVREAKRALRQVLLNRRNSLHRARLVRAQSRTRLAQVCESEKENGRNCM QAPDAVSDLHASETMGKRSAGASAASPCVNAEGGDRGRDTSQRGRSGEEEGVLVSRGLSE FVEKHVGAGPVSPFLSAVSPSFGVPAASSFSPLPEFPNCMRAGGMGAVSPDRDTDMQFAK EEQGEEGEERRRKMRGRFQDLLGAVYPQIVHLDGQLRAGKRPLVVSGYSPIGSELDSTFL LSLAESLGHACALPCIEEKRAPLTFRQWFCGMPLVPGKFNIPAPQPDCRHPVVEPDVVLV PLLGFDRLGRRLGYGGGYYDRTLCELRRRRGTH…	0.041	0.9927	OG5_127997	no	no	no	Vbra_17187 (2e-36)/(4e-28)	YER183C	Yes	5,10-methenyltetrahydrofolate synthetase;involved in folic acid biosynthesis
TGME49_208790	MC family transporter, putative	APEX	Y	0.593316	33687	0	MASSAATSLAPSSSAAVPATANKKNPEPKTPLEIIMYSKDQAFRGGIAGASAQVVNVLAF MWLRTTMNYQYRYGGTTFGSIKKLYREGGVRRFYCGLLPALMQSPLSRFGDTAANVGVLA ALDANPRTQDLPIGIKTALASCGAAGWRFFLMPIDAWKTTKQVEGGGGLKVLINKVRTHG VSKLYHGSLAAMGATWVGHYPWFFTHNYLSETVPQFEFAYGKHVRYALIGFASSVVSDTC SNSIRVVKTTKQTSVVPLTYLQTLREVLSKDGFTGLFFRGLGTRILTNGLQGMVFSVGWK AIQDQLNKKN	0	0.2721	OG5_138965	no	no	no	Vbra_18995 (4e-163)/(5e-164) | Vbra_19101 (6e-87)/(8e-90)	no	N/A
TGME49_209010	elongation factor Ts protein	APEX	N	-4.21756	52349	0	MCLFEANCFSAVTSFSFVSTSPPPPPPSLVIVQLANFSSDSPQGFAHAAAASRVAESSTR SEEPKAKEGDILALVKKLRARTGGVSIGECRKALEESNMDLEEAAVNLRKRGIARASRRA DRVAAEGVIAAVCLPAARQSGAASGETEGQASNSGGGKTVCLLELNSETDFVAKNARFVA LARAAATAAVQAAEEARRQETGEALSSEQGERISRAALIEAAQASLVDPQEFREAGLDGL FQPETRRSIPAVPPPGGESEAGGSSTLGDMMALLSQQFGEKLQISSIEHVSLPLSPSPAS VHQAVGWYVHGQVAEGVGRAAATVVLEWREKGDLGDSSPAGREEPGPDTGRRLEILAKLL AMQAVATRPRFLKLSDITPTEMETERQILRASV…	0	0.0226	OG5_127934	no	no	no	Vbra_3539 (3e-23)/(4e-17)	no	N/A
TGME49_209150	non-proton pumping type-II NADH dehydrogenase I (NDH2-I)	APEX	N	-0.189234	67026	0	MAGQWLRLLAGASVPMLSLPARCDSPASPSSPSSPKERVSALLAQPPRPFSAFSPVSTWM STKWTSFRLRTGLLSPAAVAASAVASASPAAREAPARRQKVVVVGSGWAAVSFLADLDMT RYEPVVISPRDYFTFTPLLPSVCVGTLPASACMTGVRELLVRGGVPCGSFYEGRVAEICP TEKKVRCQSTHGKAQDAREWEESYDYLVVAAGADVNTFGVPGVKENAFFVKELEDARRLR SALFDVIETASVPGVSEEEKKKLLHFVVVGAGPTGVEVAAEIDDFFQAEGATHFPQLRPL VRITVVEMLPTVLAAYNNDVQAFAKRLLEENPRVDLCLQSQVVGVGPDSVKVRTKRADGQ VEEKEMPCGLLVWASGIKSPKVCLDLARKTAEL…	0.724	0.5699	OG5_126960	no	no	no	no	YDL085W, YML120C, YMR145C	Yes	Mitochondrial external NADH dehydrogenase;catalyzes the oxidation of cytosolic NADH;Nde1p and Nde2p are involved in providing the cytosolic NADH to the mitochondrial respiratory chain;NDE2 has a paralog, NDE1, that arose from the whole genome duplication
TGME49_209260	cytochrome c oxidase subunit, putative	Both	N	-3.06633	34707	0	MAAARLSQVFAPGAAPRHLFSKSFSAVSGKNISSFSQLAARSSACTLASLSSPLCSSGLS PRVLSGALSPAARKTAMRTYLHFGRTMPEDFELPSDTMPKNVAELMSKNPKDLDFFENYW YWKLRGEAVILDPATLPQKSYKQLARDMGMQIVTEETEHMVGLLELYEHLRAAAFVGPFG TVEKPVLCPSVTTDRIVGCTGGTGEKEHVPLWFRCREGFLYRCGECDQIFMLVRVFYSLP DGKDPFPVDPDVEDVFDMKLLEKGQKMWNCNEYVRWPAGHQAYSELFLEGKWGNEIPRRL AQELKEIEAA	0.81	0.9983	OG5_145128	PF3D7_0927800 (2e-109)/(2e-110)	no	BBOV_III010970 (3e-111)/(4e-120)	Vbra_9355 (9e-98)/(1e-98)	YGL187C	Yes	Subunit IV of cytochrome c oxidase;the terminal member of the mitochondrial inner membrane electron transport chain;precursor N-terminal 25 residues are cleaved during mitochondrial import;phosphorylated;spermidine enhances translation
TGME49_209420	hypothetical protein	BirA	Y	-2.96091	26853	0	MSKLSAFFEKKKKKSLKSSTPAGLGEKSKKDEEPVLVEEDSSEWVVDDQPAKPASPQEDS LATWLKVSVVDAASVKKKEPEKTWIAYGDGDVEGPESDGERGQSACSPEDSPEAASLSAE KAEAPAAKKWVPPSLRGKRATGGGAGACINFDDDQDLATAAQLGFYSGKGVQKKKATPTQ AAKETKKEKEKKSGEGEEKQAVEELPPVPEFDVWKYVQIDGGSLGSKAPQNDEAVRAKYQ NRKRLPSRSA	0	0.0238	OG5_239298	no	no	no	no	no	N/A
TGME49_209680	hypothetical protein	BirA	Y	-1.0149	64386	0	MATRTSFPRSLSQQLFRPLALFPLRDGTRSLAFESRPRRLTSLPHLPWQPRSVSAASSTV NPLPGLKPCAHRPSPGSFSSPREQPTSLLSVESRSSLPAQGRLSFSSLSSRVGVRSSFRT HRDVDKRRDPLWLRQSGRFFVTGTGQPARTASRDEQMKNSAEDLSSPRNREDTFDSTDVK KEVTNEKELEKQVEAMAAESSSSDASSFSGASVQDKPSTTSATMSSASGSVSPPASAGSS SPSPSSSPLSESSSSSQDKEKPQETSENKWGFRHYFFGSLGLGLAGGFVYVLAENDFNVA KAEWAIGEKIRARVFKYTRNGPRQEAADNSKFSVGLSEELQKEIALFFLQLDLDKPNGVR RSDVMELVKKLGFSPSSGVCKIFLENGQGRTAD…	0.408	0.9882	OG5_239310	PF3D7_0710100 (4e-24)/(5e-17)	no	BBOV_IV001750 (8e-13)/(9e-09)	Vbra_18214 (4e-22)/(2e-23)	no	N/A
TGME49_209870	HAD hydrolase, family IIA protein	BirA	Y	-1.10058	95121	0	MAEREREGEREKRERRRAKEKERKKKRETHKKEQTEPEREKGKSNSPGCRVPLRTLSLVHRFLFFSFFYQEVEEKFLFGSEGTFSNRHPRKKTHCSSFLRLKTKAERHRSRRKRVCRSFLFFTFARCRVSPRSCRLRIPSLLLAHQQENGRNRRPQTSLGQHSGRVSAGKTPSAMKKEGKQTNAHAPTGALWQSPSLLSLTKRRFLFVDRKRENRIPCLLSSGSGKLLAACSQRTTSTRGEARKTPRRSRTALPRQKPLPPRELGEVTALCIFRKENTAKTLAILQEMETKEATIKKPLSKAHVTGKPFAFAVPRLKPLSLEHPCCSSSSSFSSSFSSSFSSSFFSSSSSSPFCVSPFPLPLASCRSSSFRHLPSSLRSSFSTMASPSASLLSAPLPWL…	0	0.0045	OG5_127049	PF3D7_0715000 (3e-62)/(3e-62)	no	no	Vbra_16704 (1e-62)/(5e-65)	YDL236W	No
TGME49_209950	thioredoxin, putative	BirA	N	-5.1957	47700	0	MAPLRVCAFLPLVCFAFLSLAAGAKIRIDPMTHDVALVTQQNWDGKVQKFRAHQVFAVLFYKDGCSECQSLLDGEFNTLAKKMKGMVGVLAVDCGESAKLCTDQNVSSYPTILIFPPLPLPPYKFEGTPNYASLSKAVGPLIPSSVIIPTDMKDFEKAMATHVQVPKVLVFSDKPKASVLLKALSTAFKDKLHLVMINAEKLPEVVKKYRVTKFPHIVVTRKDKKDEAYKGEFNFQVLFDWLNVFSETFVLGGGFSDHTPKAEPSPETQPWKFQVIPELTKRSNVDLCFKKSLKALCVIYLKQGRELTAEETDMLEALKYQYDSGKGPDFRFMFMDVDTETGFRDLFAMESYPSVVVFNPHLKTRFTKLDADEHLSKESIASLLDKISSGNARFKVVPS…	0	0.071	OG5_139311	PF3D7_1104400 (1e-97)/(2e-91)	cgd2_1780 (1e-61)/(3e-63)	BBOV_III006100 (4e-70)/(2e-64)	Vbra_3324 (7e-115)/(1e-110)	no	N/A
TGME49_210730	ATP-dependent hsl protease ATP-binding subunit hslU, putative	Both	Y	0.468331	73068	0	MGRSPVFLCLSVGKVPYHTAMALPPASALREGLSFSASARTQRLFLSGARRQFHCLSRSG SSEFLFLPSSPTPLKTDSPLARRGFHASRKSIRGKTPGGVFPETFLRMLHSATPGVSSHG EKGSQENSDSADDQGVRKLQETVAPLSEPPLSLDNAEGTVRNEVSTTEPAEQIDDFTKDP DEIVAALDKYIVGQDTAKKSLAIALRDRWRRQQVKDEKLRREIAPNNLLLIGPSGCGKTE LAKRLAAFAGAPFVKVAATRFTEVGFVGDDTSSIVHYLAQQAYTDEKERVKKLIHGEAAG RARQEVARALRAQGAVNDSEDVIAAMIKDGRLDDVEVEIDENLLQRHPEGPQDPLSALFS SLGKAMNSQRGGPLAPVGVGVPGPVSPEAFGLP…	0.111	0.8756	OG5_142649	no	no	no	Vbra_1378 (7e-162)/(2e-167)	YBR227C	Yes	Non-proteolytic ATPase of the AAA family;stimulates incorporation of the pyridoxal phosphate cofactor into Hem1p (5-aminolevulinic acid synthase);localized to the mitochondrial matrix;ortholog of vertebrate CLPX, which promotes erythropoiesis
TGME49_210750	Ferredoxin-fold anticodon binding domain-containing protein	Both	Y	-4.37802	96120	0	MWPCWPSLFGEAGWPTSFRVPPVPFTSSVSFRPARTHPRAAEVSPRAFVLLASLCAYAVD HRRASYEKFVSQPFAFLPVHLSSRPLPSPMRVSTRTSLLKCLHQSGVGSWYGSALARPAS RNIASQMVSLREGQLSTTPDRCHTEPLHSRKLAYRQIVNFFPQKKNAVRAERTPVCRFLS CQTQQKSGSCCSIQAPEAATQSYANEQAGGAKYSRPPHIPASVWEKLNRHLHRQADNPIG ILKKQIDSFFLQENDALLKNENIWNEARSSLLFPSFLWHHARTSFEQPSESLDPILQESP IDHLGCSCGKTPESGASSLMSDSSQSSAFSSAPLSSSGAPVHASLKEATCDTGDCSGSPL FAPFQLFDDFSPFVTCRQNFDSLLVPLDHVSRL…	0.068	0.2142	OG5_128825	PF3D7_0603700 (2e-40)/(2e-41)	no	BBOV_II007170 (2e-60)/(1e-61)	Vbra_12979 (5e-72)/(3e-73) | Vbra_15842 ( 2e-26)/(7e-29)	YPR047W	Yes	Mitochondrial phenylalanyl-tRNA synthetase;active as a monomer, unlike the cytoplasmic subunit which is active as a dimer complexed to a beta subunit dimer;similar to the alpha subunit of E. coli phenylalanyl-tRNA synthetase
TGME49_210790	dihydroorotate dehydrogenase, putative	Both	N	-2.84298	65065	1	MAPLTMHFQGRFALLRLPISSGKPLCRETRVRRSGTRPVSADNLSHARCVLPKCHSFCPA GGMQESPEARVTLSRGTSRNFGTFLTALGNDVHWKSAFPGALLRTQIRKLSVSLHPRPGS AESSRPSAGLPPKDVDPEEIERIVRERTTRERKANRRLVFLVLLLGTGVYCYSALQDVSS MIYSFYEPVTSVLFRYFSSGPLDPETAHGYTMELAKRGWLPVDYDREESALNVDINGLKF LSPIGLAAGFDKHAEAPAALLRMGFSFLEVGSITPKPQPGNPKPRLFRLYEDRSVINRFG FNSNGADYAQTQLEAFSEARLRDPFTAQGVLGVSLGKNKTSEDAVADLREGVKKLGRFAD FLVVNLSSPNTPGLRSLQSASHLAAIIDGVQEE…	0.606	0.8501	OG5_127289	PF3D7_0603300 (2e-100)/(9e-102)	no	BBOV_II007190 (4e-99)/(3e-100)	Vbra_7220 (1e-123)/(6e-124) | Vbra_3487 (1e-38)/(3e-39)	YKL216W	No
TGME49_211060	hypothetical protein	BirA	Y	-3.31173	11578	0	MPFMWRQRAYCAPVPSAFASQQPNGLGGEAGVRKPLLRSNSESLSVFSQIPDGLLGHTTS VTMGNSDIFFLPKPSNLLKIALPAFVFMPNLTIFTRAFPFYAHTSA	0.033	0.2255	OG5_154759	PF3D7_0801600 (6e-09)/(7e-10)	no	no	no	no	N/A
TGME49_211090	aminotransferase, class V superfamily protein	APEX	Y	-3.54178	68284	0	MSRLAKVACAAAPPCRGRCYALSTVPPLTVFSSRSSSLSSRSSFSPLSSLFSTASCVPLQ TTAVRASSRSFLNLHRGPLRSRPDLADRERRTATLATFNTEENSPFCRSWNATSPALLPS ASRQHPQASDLHLFSPFLASAAAPFSSVSSSSSPSSPSPSSPSPPSSSSSPSSGSGAFES GGEAVVGSRPVYLDNQATTVQDPRVTDAMLPFLFDKFGNPHSSSHAVGWEADAAVEKARK QVAHLLGLDASRAREIIFTSGATESNNLALKGAVHYYCRGHPVTFRKSEKRGETRAAARA RRHVITTQLEHKCALQCCRMLQLEFSESQGARGCDVTYLPVKTDGLVDLEELEKAIRPDT LLVSVMFVNNEIGVVQNLEEIGKICKRHDILFH…	0.044	0.997	OG5_126959	PF3D7_0727200 (1e-151)/(6e-151)	cgd4_3040 (4e-154)/(5e-154)	BBOV_I002660 (2e-150)/(2e-149)	Vbra_7562 (0.0)/(1e-179)	YCL017C	Yes	Cysteine desulfurase;involved in iron-sulfur cluster (Fe/S) biogenesis and in thio-modification of mitochondrial and cytoplasmic tRNAs;essential protein located predominantly in mitochondria
TGME49_211680	protein disulfide isomerase	BirA	Y	-5.64684	52802	0	MRAGFSFALLAVGLLATAVVYSAAEEEAVTVLTASNFDDTLKNNEIVLVKFYAPWCGHCKRMAPEYEKAAKTLKEKGSKIVLAKVDATSETDIADKQGVREYPTLTLFRKEKPEKYTGGRTAEAIVEWIEKMTGPAVTEVEGSAEDKVTKEAPIAFVAELASKDSDMAKLFEEVANESRQLGRFLAKYGASDEKIYSLRYEEGTEAFTGKTKDELKKFVDTESFPLLGPINAENFRKYIDRDLDLVWLCGTEKDFDEAKTAVREAAKKLRDTRSFVWLDTDQFKGHAENALGITEFPGLVFQSKKGRFVLPEATTSLKDAAKISQFFDDVEAGKIDRSLKSEPVPEKQDEAVKVVVGKNFEEMVIQKDKDVMLEIYAPWCGYCKSFEPIYKEFAEKYKD…	0	0.2093	OG5_126843	PF3D7_0827900 (2e-147)/(5e-147)	cgd6_120 (2e-111)/(4e-111) | cgd7_5100 (3e-37)/(6e-37)	BBOV_IV002330 (9e-101)/(4e-100)	Vbra_12065 (1e-162)/(2e-162) | Vbra_14444 (8e-114)/(3e-123) | Vbra_19861 (4e-71)/(1e-71) | Vbra_4784 (2e-41)/(3e-41) | Vbra_20284 (3e-26)/(3e-26)	YCL043C	No
TGME49_211690	AAA family protein	Both	Y	-5.0493	167151	0	MSPPTNCLAVQLPLSSPSSASSSFFVAAPLRRGAIQRSASASQRPRFVSVLYRNAKLRAS SFDARVKPLRLPLSLRSVLNLSSPDLARPASLFALSSAASCASQSRRLPHSPLSAGRWLS GPGFLASPLSVGKRLCSRLLGAAPSELFRGNMSGRGFAHGGSLDGGGSREPRSAALASAD AQRAPASARRGRNFGAGRRGSQGFLKEGTAAFASLRNGPAASASPQASQQLTHSAGTPSL PRAQAATPHPAASSPLCASPPAASPSPAAEESVSLEKLFGGMGHPQFNKHIVDDENILHF YGIRQAVLRPVVHEDCSRGASAAHASSPPANSRRGKEPSQNQFFKATLSWTISGKRKIQT EGVGRSKKDAKKDAVKTLLSQLGPVTLHEYEQV…	0	0.9988	OG5_146660	PF3D7_0703500 (0.0)/(0.0)	no	BBOV_III001810 (5e-143)/(8e-144)	Vbra_18646 (0.0)/(0.0) | Vbra_20824 (7e-73)/(4e-74) | Vbra_15071 (1e-67)/(3e-68)	no	N/A
TGME49_212260	Sjogren's syndrome/scleroderma autoantigen 1 (Autoantigen p27) protein	BirA	Y	-4.5008	37896	0	MSGLSSAAHGGMAASSLAEQRRGKTGEGQVKTASEGLAEKLLLGWTMLGDTCPQCVSVPL MRNKQQQLFCVACQTFLPASALGEDQDAEAPRHSPAQGKNDYGGRESLRSNGGAHRNQPS ENRHRASADATTPQVHCTPIAGRGVQYQMVAAIPLDQADSEKIESTLASVVGKDDDTSGS LWRLDGAHARSNARGPGLTQEDEDVEERDKEQFRLTAKEKYFQASADLMKWRERTLQRCG VLPASERQPPNGYPKPQALESSERAVSFQAACSVAGRSVKDERGIEVSAMCPSRNDVLNE ARVAVLTKIRRYAAALAPSNPNTMHTVQSERQVLLSLQTAIQVLETLDALS	0	0.0107	OG5_224917	PF3D7_1006700 (0.007)/(8e-04)	no	BBOV_IV006750 (5e-05)/(3e-06)	no	no	N/A
TGME49_212930	NifU family domain-containing protein	Both	N	-1.02858	40510	0	MAYSTHLSPLGWCRVLKNPFHFLVSTEAFSRASTFLARPVAAVSQPFSLRRNCGALGLSE HRSGLENITLVQAKKNHTRALGTSARAGGCLEADAPRGDSAAPTSQITLSVELTPNPQAR KFVVVNGPSLISEPSSGSSRSYTRQQRRHGDSPLADCLFKIDGTSSVLIAGGYVTVVKAR DTDWKDLEEPVKRCIQDHLTSGIPAVQRAVSSEDVSGAAEGRPEVPEKKNAKSEEEEDLS EAIRELLHMRARPMLQADGGDLEMMRFDEETGIVWVHLKGSCEGCPSSLITVKRGMKQML QYYIPEVRTILRVDRSELEGVVAITVASPDEYHSTQWVTLPSANALCHLTQVEDVRQCDE NGDPLEDDEE	0.247	0.8658	OG5_127523	PF3D7_0930900 (4e-15)/(2e-16) | PF3D7_0921400 (1e-04)/(8e-06)	no	BBOV_III006970 (8e-13)/(3e-14)	Vbra_22053 (1e-40)/(4e-43)	YKL040C	Yes	Protein involved in Fe-S cluster transfer to mitochondrial clients;protects [4Fe-4S] clusters from damage due to oxidative stress;acts along with Bol3 at a late step in the transfer of [4Fe-4S] clusters from the ISA complex to client proteins;Fe-S loaded homodimer at steady state;similar to NifU, a bacterial protein required for Fe/S cluster maturation;ortholog of the human NFU1, mutations of whi…
TGME49_213310	hypothetical protein	Both	Y	-2.25595	170253	2	MPLLSVSLLCVSLSACWLAGLVSPSVRMPRVSRRLVILLALAIYCMSRFVDLPSLFSLSL ASTASFRRDTPPPLTFSPPTALASSLSSPHYSPLPSASLFSPSPCSPPACSPSPWSSSPP SSRAFACPRGSSLLGVEPSFVSPVDLERSEKISSSLSRTRPSQLSARPAQSPERSSRRDT MESLHKAPLSKVFTTAHARLSSGSRSSPLSRFASSSSSPQAICGILPCCRKSKSLRGAFF SSSSRRASPRLCRSALSGPSCESPVGSPTPSSILSRSAASRVLFSLSNVSLFSAFSTPLP PCSHARFPSAAAGTVSSCVLSFCVSRTPSGSRSSLPSCFSYVVHSVLSDAPSLSRQTRCL SFCSWTPPLSPLSSSFASPSPRFSASSPSGWLF…	0.005	0.9781	OG5_239608	no	no	no	no	no	N/A
TGME49_213420	RAP domain-containing protein	Both	Y	-4.73194	78562	0	MATFRLTYSGRPFSGLANLGGTSCSSSWPHLGRVSSTAQSSRRVSSAALSSAASSDSSPP VVSPVSLSPSSSSSADLSPVASASVPPLSNSSSCVLSSPAACASPCPSSSSSRSFPLGIK QTLPRHILRATGDQPSSSSSMSALAAKPPKSPCSLSVDTCKDSSPSELVVYERRDGKRWV HRHQLSLYLSHAVGLGYFRAQFEDSSVTPAAVFDCLSHLVRPPVHAARSEEDEGDEGGER RQNKQVDGAPDGDGERVTAQDLSEFMKNCVASRYRDVDVLDVVTDVLSALLIGSADLPLL VDIASSCIALSLLRPKLFTAIASRLLVLLPPAPASGSSPLDAAALSPRQAVRLVESFSHQ RFRHPDVLPLLFLSLSPSLPFLSPRLACRLLHA…	0.036	0.7386	OG5_147445	PF3D7_1114400 (4e-41)/(7e-42)	no	BBOV_IV005550 (6e-24)/(2e-24)	Vbra_21878 (5e-62)/(9e-70)	no	N/A
TGME49_213600	hypothetical protein	BirA	Y	-2.50664	75684	0	MLRMAGCRAWRNPEGFALLSCSKSTFSVSHVGASLVCRREEWGNPSISAHVLSQLDVAPRASCLRRLLAVSELVKPPWSSPAASATLPLLVLPSRWLSCSILPPPLPPSPCCLLLSRRPRLCPLSASFSSASDESSSRRLPRAVSRSRSLFADTLAACDTSDQVLQLLRASASPPAPNASPGRSCSPAVCPSTVMLLPEDCLAFLNALLRVQHVKRSGPDFIFFCDALENALSRLNATAEREQTEDREARERQHLERCLYASLQGCETKRPSREATSEARSKTSSLAFKDERRRGKTGAERGKFVRAVLLKLADLKAPLAFQRMTPYLEPHLPCLSAFDVAECLWAFATLQPPDWREKNGHLVRRLVERLLEPRGEAAARVGDENGGDLELRRKAKRPT…	0.147	0.7148	OG5_241437	PF3D7_0107100 (8e-16)/(1e-18)	no	BBOV_III008210 (7e-05)/(1e-04)	Vbra_19801 (3e-35)/(3e-35)	no	N/A
TGME49_214250	hypothetical protein	BirA	Y	-3.93545	9445	1	MSRAVYAKLWASTAQYTQRRHYAWYQIWSRVIPWSVPWGIFAMWMVFPAMPVEYRQALTF GIWQKPNIGTHGPDPADAKK	0.096	0.4358	OG5_153566	PF3D7_0722700 (6e-19)/(7e-20)	no	BBOV_IV004900 (2e-17)/(2e-18)	Vbra_12339 (2e-13)/(2e-14)	no	N/A
TGME49_214310	hypothetical protein	APEX	Y	-0.115615	75846	0	MASFSVSVTRSSRAWLHPVTETVSQMHCRTYLHGTAGRQLSRCRCARGIFSCATRPGIFL RQARPHHQRKSVRLAIRGVSSSRDWYSTRHESAASLVHNLRWEKFQRGRNPTATFGPEHG MRSAHPLPSTGGIALVCSDLPNRQLTGRSRAEFSRCLATRRGVRGSKVPFSSRCDHSHSA SCFASSFAPANGRKGEASSSEGVFRQEHTSDERVMAGLERVSGIHRHACERCSQDARENV ELLDTRRKQVLNNLPAYVRLVESGPIQVVIYPIVHGNAETVSHVPRTGDCGTSTEASQLI RVLHPDFVFFGADPSARKGGESSYSQALGWPSSFGILPRVFGGFLPFSDIQEPLAAADHV HASVGFLDRPKAATTNRLHQQLLQNSRYSRAYL…	0.216	0.9974	OG5_240867	no	no	no	no	no	N/A
TGME49_214370	hypothetical protein	BirA	Y	-2.46116	90961	0	MGLHAIAPTKFFLCVPAMNGLGPFFALREGNVRVGGTVPLTKGSSGSSCRVLPWPRTRGR AANRVFQRPVSNCQCFSRTARAHHLSGSSVVLANANPASCAPGSSFRCFVSGHRSEDRPR DPERRCTDIQWAIPLYYVSTIADARVAVDWILSCCKESFAGAAGCFSAPPQLRRLAMLPE TNATRSFLHRGRDSKGFGDSAAVSAVFGTPGQDYVDVLGEAADLSGPAGLFGSSTRSRLL RSSIGVHLPLLPESTPFASTPHALRHPSQCPSSPPTPGLLRDDSSLNSAEGGCRKGTRKE DKRDSYSEETQRLLHHGGRTELLRSLYVSTSTAVILFSFCSSHSFSSPEDSSARRSISSM FFSPSSSTPRVSGSSMRQHRELVRFVCSSLLAN…	0.006	0.9986	OG5_240869	no	no	no	Vbra_1463 (2e-25)/(4e-24)	no	N/A
TGME49_214750	hypothetical protein	APEX	Y	-5.01173	119986	0	MRVPIAPSSLSKATRRKLAANAAAGPAVSAVPAPAFSLPPSASGRPFASAPLLFSPCGKL PAGSGLPYDAATGSGPLALGDMRSCVWFPSVCNALLHRNRFFSVAPPPLYNGAAPGFRED SEAPRYPPQEAAYDASSYGVDPRAPQFSAPGTPYDASGSLGAYGYSGAPGQAVLGYPAPY GQGYGGAVAPGTPYGSGVPSAGHYPQGVPQGFAGEAGYWPEGQTGAPQGEGYWDETQRHL AQGYPGQMPGYPQASGAYPPSSPYPPPGTPGAGSPPGHYATPGYPAPDHGQYAPYARAAG APGAPGYGFGSSPSLQPSYYSAPGLQAPGGAPGGAPASQGDESARFQERMMELLQRRLGH RAWLYESALKKGGPEALLRLANDPEVLLHARSI…	0.292	0.9676	OG5_159603	no	no	no	no	no	N/A
TGME49_214790	glycoprotein	Both	Y	-3.47951	31444	0	MATSASVFRLFSSKTPLGLPGVLSSSRERMFLSSSFCSAVLREGRLGAVPFKAPAGLAAA ATNSRFFSPLTGTQSSAFAAEKRAFSSEADSSVEAASKDLLKTIQSEIQHEQSTYEQDAD LKKFLQTSGWSVAESDNNMMVTLQRQVGSKKVVVEFSCVQSAEAPTEEGPMPEMSDFTVT ITNPDESGVTFYCSTTQDEEDKFRYCIGQVRFFKNAEEKESLNVYPGPYFEDLDDSFQQG LDEWLAKMGVDPELCDFIDRFSVDKENREYLAWLKKLAQFVEH	0.122	0.8449	OG5_129822	PF3D7_1434800 (5e-63)/(6e-64)	no	BBOV_III002260 (1e-58)/(1e-59)	Vbra_14273 (2e-44)/(2e-45) | Vbra_3943 (2e-41)/(2e-44)	YIL070C	Yes	Specific translational activator for the mitochondrial COX1 mRNA;acidic protein of the mitochondrial matrix;related to the human complement receptor gC1q-R
TGME49_214870	ribosomal protein L9, N-terminal domain-containing protein	BirA	N	-2.04315	53952	0	MTSCVRSALSRGAASAGRGSLSVFSLRVSSSQHLCHFSPSLCPSRPRPAEKTPMSPLPSQ DLQGGGELPGCGNKYLPVSRFRPSVHASEADCSAPSLSSQEGRQKLRGRNARARSQGAEQ QSVNGEAASFSASVFLSSQRLLAERSSEVSTSGTCRRLPPSSGSSLLSSVAVSASGVRCL AGQRRGFAISHLNPSISKGKVHYRVPNPYIPVLLLQAVPGLGKRGELKQVRRGTLRLFLA PKGLAVVASWQNIDAFYLAEKEEEERRRRAQAGRGGKQLRERGGDRGDNRLRGARDEEGD GEEGDSLQTDSRRAKEDGEDEEELTTEGGTRGEDAGHAPVASFLNKYRAQFLVNTEDTDP TRIRGNGVSLFDLLNKVSEETELDLLPSQLAIG…	0.943	0.9651	OG5_204419	no	no	BBOV_II004790 (1e-08)/(3e-10)	Vbra_15011 (2e-06)/(5e-06)	no	N/A
TGME49_215020	hypothetical protein	BirA	Y	-5.45039	59368	0	MLRLQLAPERVLSPAVSAHTPRLPLRFCSKLDGLLAARPIPPACAARGDDADFTTEAPASLRELQGRLSSLKTARAGFPRSVAPLTLLDASISRLSSLHTYSEASSRPAHLSSLSRAVRRPSPLASETPPSPGTPSAPSTLSPVLRRSSLSSFSSSLSPAFDSSLSFRSSPFVSSSRASSSVASSPGSGDAAARGRKTRRVFSGTGGLVEDGDQPFRANCGGEDRRVWRFPRRPPGGESWRTVFASHGMRHLAELYDGSGSPAEEAREKEAKLNWFALGRVVDQNRGRHLAGYTVPYKFRIIDPISVAKSVPKNLGQLNRRTQTGDQYVDFSQNRFPVLNTAENFRYWKDRGLDRLLPRVFPLKLPAHRRVDPLLREYIFFLHSMDPARFSIRKLGERY…	0.392	0.2364	OG5_150528	PF3D7_0105500 (4e-73)/(1e-72)	no	BBOV_I003260 (9e-47)/(3e-46)	Vbra_16970 (2e-85)/(2e-90)	no	N/A
TGME49_215280	succinate dehydrogenase [ubiquinone] iron-sulfur protein	Both	N	-1.99198	38611	0	MLSSALRSVRPAASAASRRFASVAHAQTAASEAEAATKVPDFRTFAIYRYNPETDKRPYM QKFELDVSTCGPMILDALIAIKDRQDPSLVFRRSCREGICGSCAMNVDGKNCLACLTPIK RGDRENEAMRLMPGQDIKHDRHEEEVVSRVTDKINHALFREANPPVEILPLPHMMVLRDL VPDMTNFYAQYRSVEPWLKRKTPKKDPNVENLQSIEDRRKLDGMYECILCACCSTSCPSY WWNPQAYLGPAVLMQAFRWIADSRDEFTEERLAAINDTMKLYRCHGIMNCTVSCPKGLNP AGAIQKMKDQVEARFSPAWKSLQAQQALEKSQKLAKDLGLAA	0.999	0.9755	OG5_126893	PF3D7_1212800 (1e-116)/(2e-116)	no	BBOV_IV005280 (5e-117)/(2e-117)	Vbra_11127 (8e-135)/(2e-133)	YLL041C	Yes	Iron-sulfur protein subunit of succinate dehydrogenase;the complex couples the oxidation of succinate to the transfer of electrons to ubiquinone as part of the TCA cycle and the mitochondrial respiratory chain;other members are Sdh1p, Sdh3p, and Sdh4p
TGME49_215350	hypothetical protein	Both	Y	1.81843	16143	0	MSSPCCVAIRRVARTTLESGRRQVDSKSTDVSPFFTGTQQMSLPSAGMVTKIRNFSSVKF MDQKRSGEETVYFKKEDEALLRNLLANHPEYDPKYSVDHMNAEVGSIARDITLACQKHGM KDPSAAFMKDLISIFGAHGYAKNSK	0.133	0.9102	OG5_154763	PF3D7_1314400 (2e-24)/(2e-25)	no	no	Vbra_15956 (5e-09)/(1e-10) | Vbra_13790 (6.2)/(1.8)	no	N/A
TGME49_215590	flavoprotein subunit of succinate dehydrogenase	Both	N	-3.96225	72752	0	MHASASLTQALRPYARRPLSSALSRSSLSPALAAGVARGLNAAQPQATGPSFVQQKRFFT NVKKPAYRVIDHEYDAIVVGAGGAGLRAAFGLASAGIKTACLSKLFPTRSHTVAAQGGIN AALGNMTEDDWRWHAYDTVKGSDWLGDQDAIQHMCREAPKVVRELESYGLPFSRTEDGRI YQRAFGGQSLRFGKGGQAYRCAAAADRTGHAMLHSLYGQSLAHDCKFFVEYFALDLMMSG ENDERKCHGVVAMCMEDGSIHRFAAKHTVLATGGYGRAYQSCTSAHTCTGDGGGMVSRAG LPLEDLEFVQFHPTGIFPAGCLITEGCRGEGGILRNGQGEAFMARYAPTAKDLASRDVVS RSMTIEIREGRGCGPNRDHMHLDLTHLPPATLH…	0.981	0.9958	OG5_126927	PF3D7_1034400 (0.0)/(0.0)	no	BBOV_IV007210 (0.0)/(0.0)	Vbra_17232 (0.0)/(0.0)	YJL045W, YKL148C	Yes	Flavoprotein subunit of succinate dehydrogenase;couples the oxidation of succinate to the transfer of electrons to ubiquinone as part of the TCA cycle and the mitochondrial respiratory chain;FAD binding to Sdh1p is required for the assembly of the succinate dehydrogenase subunits;mutations in human ortholog SDHA are associated with Leigh syndrome
TGME49_215610	hypothetical protein	BirA	Y	-3.55127	12966	0	MGFHFQQYIAMAGRAINPVQWTRAWRRMEGKSATEVYRDALAWTNNQVAQISRASQYRAWWWQNPLGMGLVLYGTYKAWHMIYMVRKQKKTAQLVAAAYGQGGQWLNPVPR	0.157	0.8564	OG5_147473	PF3D7_1141200 (5e-44)/(1e-43)	no	BBOV_III007490 (4e-44)/(2e-43) | BBOV_III007460 (9e-41)/(5e-40)	Vbra_4042 (0.46)/(0.032)	no	N/A
TGME49_215710	hypothetical protein	Both	Y	-3.94482	89108	0	MRATRAAVPRVGLAPWRVPSVRSFSSLSSFWGRASSSLNFHFRSSAPSCSSASRVHPRSP PQRSSCSSPSFSGSSSSSFSSAPSWSPSLPGCSSSLSCGVSAALSASPPSLPGYAPSAAR FSSSVAARSRLQPTQEASGEARGSAEDAPDSDARRRWTNPQDAQWPHLPRAEVEASLNLL LTDQARQRDTGVAWVTGPVGVGKSYMAQFAVQRAKRDPSLARDTLVLAFGMKAVAHSSFP VLLGVFQRSLVKQLLSQKASLARLASPTSSSRGRETCFPREASSEVLTGPWICATVDAAC PSFRPSVACLLRSAVSSSLSSSAPPPFAIGTGLAPTDEKERQARTMRFVEALEDATVESF THWRGLLEFLALKVPSFSLQAKLSEKEPCDATS…	0.25	0.9945	OG5_240901	PF3D7_1032300 (3e-20)/(8e-24)	no	BBOV_III008550 (2e-13)/(3e-14)	Vbra_5571 (2e-31)/(2e-35)	no	N/A
TGME49_216010	ribosomal protein RPL24 (RPL24)	BirA	N	-3.70289	48020	0	MEVFPSIRRGLGARASSLLSASTVSPLTPEFVSPSQKVEAFTLSHAKFLFSSFPISSSVA SPMFPSLSAATCGSPPRGKLSFSSSASRHDSSPQRGRTTTDSLPSFSPFFSSSVFPPRSS ACLLTPAASPVPRRPSPRPLCSFPSCLSGCLPSRASPLFLSPAFLRASSDDLPPASASRL ASPASLAFRDLERVSPPPSSGNASLAVWAAEACSGGRDSRRGLGWTYTADSTLPQGLFEA ARFACQRRGMKFVHPRHWILQWKIRPGDKVVVISGKFKTIRGTVLQIDKMRNGVSVSGVK EQKRVKQEDGSFIRIPGLIHVSNVMLIDQAIDLPTRVALRVDDRGNVVRISKKSGLVIPW PNGEMIKFGDNRKSREFLKSKEERDVELRKEQN…	0.045	0.572	OG5_127372	PF3D7_0605000 (3e-35)/(2e-36)	no	BBOV_II007320 (4e-23)/(9e-26)	Vbra_8918 (2e-37)/(9e-39)	no	N/A
TGME49_216040	30S ribosomal protein S15, putative	BirA	N	-4.51219	44728	0	MASLARRIFSPTKALGAAAKRNPLLRFDGRSSARSRASPPLPLSSSLSEASSSPRSSSRS SSRSSPLFALSTSYPSLLAASSPSSSSPLSSLSPSCPSPLPSPSPLSPPSLGGRPAAWCL DQRRGVARLKSHRYGGVVALKTRAPKSPWYIEAEKEFLNERAQVPDAYIERWHGEDLSKL SPALRRCLHLRCASSKELHSWRKLQLCRLLQRRPFDTGSPAVQLACLTEKILNVRAHLLR HFRDQQKKKVLSIWLSRRHRVMKYLYRVDFNLYKYVCQQLRIKCVRFAIPDSRDRQRAIS PIAVDGDRCKFLIRQKLWKARFRPRQLKQVDGKVVRFTRHPMEQPSSAWNLPKEHRPSLS RAWPYGVREERLKGNYVIQNPTAAGLGYCPAPL…	0.443	0.9784	OG5_144050	PF3D7_1310900 (2e-118)/(5e-119)	no	BBOV_IV006080 (3e-43)/(1e-44)	Vbra_18383 (2e-110)/(5e-110)	no	N/A
TGME49_216530	ribosome recycling factor protein	Both	N	-3.80592	51077	0	MASPATMSLRPSFSLARGPPASRRSSPSAGSLFSSASSLFSSARFPGAVQRRRLSTLPSR PLPFLSSSFASPSSGRSLSSFFSSPLPFSCPPIAVRLSCPSLLPSSSSAPSSPSSLSSSS SAPSSPSPLSSSSSAPSSPSPLSSSSSAPSSPSSLSSSSSAPSSPSSLSSSSSAPSSPSL LSSSFSAPASPWRASPSSPAHAVSRRCMASGKKKKGQKSREDGREEDKRMRKVLKVIGGD GDAAFSAADAPRAPRGVGGKAQGLQRARARGLVVREEEGEEEDEEDEREGRRNGAAEVFS VAAYEADMKAAIDKMVQDISALLVHRERAEHFERIPVSAGGEKRRLSDLAQVVVRGASTV HVHVFSEANLSKVMSALRAADSKWTLQQEGNTA…	0.041	0.9998	OG5_155265	no	no	no	Vbra_20721 (2e-29)/(2e-30)	no	N/A
TGME49_216600	exonuclease III APE (APE)	BirA	Y	-2.66887	67770	0	MRPLGSFLPSFVHFDWTFCRGLPLAENLPVSKVTLRRLEPPFASSLAVYSPSALSLSSPPFCLILPASLSGSSAFSSSRSRPGPQPSPAAAGARTRNSQRTSTMSVHRAVNSAQGEEETEGPHRETTTELNSSAASLSSSPSSAPSCSVSTSAMLQRASDSSSSGAPPVDLNPSRETRETEEDGEGELERRTEGPKRKAPLSIVTWNVNSIAARIRDSRQWFYFSRFLQKIDPDILCLQEVKLAAHGPPGAKRGDGMPRDHGRIKDSDKVSSVEARELREALHTLLPNHSLLISLADWRYSGQMMFIRKDVQVCSLRYNLSLDGCPAHEHDFEGRVILAEFEAFCVLTTYSPNNGATPKSFERRRLWDERMLQFVTQLKKPLVWVGDLNCAPEDIDLSD…	0.005	0.1489	OG5_126768	PF3D7_0305600 (1e-77)/(2e-76)	cgd2_40 (4e-08)/(5e-08)	no	Vbra_22841 (1e-93)/(2e-90) | Vbra_12276 (3e-19)/(5e-18) | Vbra_3153 (2e-08)/(3e-09)	YBL019W	No
TGME49_216650	S15 sporozoite-expressed protein	BirA	Y	1.81984	48988	0	MPTGHAAAPCRSPQTASLLAQDSFLPKEKRGVFFLNMERQATCRYDPLVEVPLPPGIVIWTQHQYYDGAGWLALPDREKLELKPTRWSDGRLRFLDPIDELPEPFKAVQSGKFDVKCWKRGDCKLGIEGDKTVFLKSPISPDVAVYVHAERLPTFPKSWKPLVFILNQSLAMFRLTENLCLLVVAEKDKTMNISCVDYNGGFACTHPSTNMVVAYGSYVLKNFEKLPSCQAIPKMLTASGDWGFFVQFYPWGFFFIPKSVELTRPQAVLGAVGMGKKVDTIGLVFHPPNMFINVKLDIPAKTTRALQFGKDFQVTAKKTSETDIDVFLVIDGQLAKYNYSFDIRINKPERPKHTDNIHFKCSCDAEEKKKPDPKFKLSACKDSVILLEQGCPSGNPDEQ…	0	0.1946	OG5_158073	PF3D7_0814600 (1e-97)/(2e-97)	no	no	Vbra_14193 (4.4)/(3.6)	no	N/A
TGME49_216660	hypothetical protein	APEX	Y	0.0739782	48992	0	MENNRFTASPFPAAHRAPKPKPFSSLSSTFFSSLSSSRFSWSPLSAIPLPPALCAATQQA SSPSPSSSPSSSEVEPATSARTSALFSSRVSQQLGVDAAAACLASFGVSPFVTVIDRSIV QGAAGRRRLWDAIGSGLRDLAVRPLHVLSGRDFRIVFGVYAGTYFVANSAATLGRELLLP EATAELFKFLSTTAANMYLCIRKDIIFAQLFGAANASPSASSPSPCHGVAGRGASAVGAV ENAVKATSRKFPMVSTLLFVSRDALTIAASFNAPAYLAAWLTRRAAADDLRRRRGSSESA AIGSDLEADMQMTREERREAAHADGRIPTMPQAHRDWMGSDRDDPVAAGGGESVGAALEE KRVWHRFVHRLAAEKSFADSTAQLICPVLVQFL…	0	0.2192	OG5_134814	no	no	no	no	no	N/A
TGME49_216670	FUSE-binding protein 2 / KH-type splicing regulatory protein (FUBP2)	BirA	Y	-3.30671	100095	0	MARKKRGSAATPEEGETPPAGQVAQKTPETGSAPQATEKPKEVSTQDLLAATALVARPQV DTSNLSASQKKNLKKKIRKQEQRQQEAAVLAVVRPEAKATGMASHYAEQEAPLRRRLEAL KRAAGQQTRGSGAPSAKKLSQDVEAVLREIDGTLEREVAALQKPLSKRVTVQQLQQQIRD VEAQVQKQQRELQRQAHQGEGESAEIRACLDESLRYVVHLREQLILTQQQNELRVFRDRL GALKAEGEGLLKALHASGSPGGERGRAGHAGNGSASPSSAKEAQWRRRLGDLSRGGPERR RGPKPAEEEETAQPQPLVVQHVSLGPDAMGLLFPGGQNPVLVRKLERACGLVLDKQSGGA GRAGTVAVVGLQAANVDRGVALLNSLEEGMQPE…	0	0.03	OG5_141018	PF3D7_1011800 (1e-11)/(5e-12)	cgd7_1890 (3e-13)/(4e-13)	BBOV_IV009030 (8e-11)/(2e-11)	Vbra_7050 (1e-19)/(3e-20)	no	N/A
TGME49_216900	cytokine induced apoptosis inhibitor 1 family protein	BirA	Y	-2.88026	47563	0	MISLAVFPSDFLRSTRSVFLCGDSNLDLTSSVEQCRSRTRDLRTPRRKRDRIPCLNAVGDKFLQVESFSRDEAFSTWNSHCRPLCVVSFVPSQSSVVFSDLSLQAALSRPASACLLCLRVSRVSTFLFRFSAMAKLSSAPRVLVLSAEDSVVSAADASKKDTVLTVLHPDTIIENAADAPSVLYDGVLILDAGKSRENATGNSQGKSAEFAAARSALQAFAQAVCRLVAAGGFVFLAGGSGEREEVHRLVKRLLIYEGLVSAQDSEVAAFVADHLPRVDSSLMWTGRKPTWAAGVADALSGNRGALPNGTAQTDGDDFIDESTLIDPTESYQPLGKDRSSCASRPKACPNCTCGRKEAEEAAEKEERRRKLETGEIRSSCGNCYLGDAFRCAGCPYRGM…	0.004	0.2566	OG5_128282	PF3D7_0824600 (1e-19)/(5e-16)	cgd6_4130 (4e-31)/(4e-27)	BBOV_I003760 (3e-22)/(7e-19)	Vbra_17910 (8e-43)/(2e-37)	YKR071C	Yes	Component of the cytosolic Fe-S protein assembly (CIA) machinery;contains an Fe-S cluster that receives electrons from NADPH via the action of Tah18p in an early step in the CIA pathway;ortholog of human Ciapin1;protein abundance increases in response to DNA replication stress;inviability of the null mutant is functionally complemented by human CIAPIN1
TGME49_217020	ATPase, AFG1 family protein	Both	Y	0.0199191	79780	0	MASLFSFRSLRLVPIDGAGAPRCCRPPYEGFRPLLGCSSNRDGRRIFTDGLSESRHGSGT YAGRWSLVEARKANAEALRFARDRRRFLTTRSGMVTEEEGLAGPEAANILRGLPTYHVKE KDLEKNFLEVDPDNPTPLLEYFSALLRQGNLEPNEAQKELMSKLQVLMDDIEAFNLKSGD PFDPLTARPPSAPAPPSSANERKTGLGLLSRLWRGDRSSDGERVAALATSLDEAKEEIVP RIRPEIRGLYIYGGVGQGKTMIMDAFYDCLKIKHKLRIHFHQFMVEVQEALHRVKSQRRY EDPLFEVAKQVRSQAQVLCFDEFQVVHITDAMILKRLFEFLFSFGAIVVATSNRPPVDLY KGGLNRQRFLPFIDLLLDSCEVFHIETHKDYRL…	0.056	0.1297	OG5_127572	PF3D7_0521800 (8e-75)/(9e-76)	no	BBOV_III003940 (2e-64)/(2e-65)	Vbra_10633 (1e-164)/(2e-165) | Vbra_12451 (2e-50)/(1e-51)	YEL052W	Yes	Protein that may act as a chaperone for cytochrome c oxidase subunits;conserved protein;may act as a chaperone in the degradation of misfolded or unassembled cytochrome c oxidase subunits;localized to matrix face of the mitochondrial inner membrane;member of the AAA family but lacks a protease domain
TGME49_217890	alkyl hydroperoxide reductase/ Thiol specific antioxidant/ Mal allergen, putative	BirA	Y	0.228651	21722	0	MPAPMVSQPAPAFEAEAVMADGSFGKISLSQFKGKKYVVLFFYPFDFTFVCPSEILAFHRLHGEFEKRGCQLLGVSVDSKFVHNAWRNVELKDGGIGKISFPLLADVSHKMAEDYGVLHPEGMAFRGLFLIDKEGVLQHCVINNLPLGRSADEALRMLDALQHVEQYGEVCPANWKKGDKAMKPTAEGVKEYLGSK	0	0.0354	OG5_126593	PF3D7_1438900 (4e-75)/(7e-76) | PF3D7_1215000 (5e-64)/(2e-64)	cgd4_740 (2e-83)/(1e-83)	BBOV_II004970 (2e-81)/(8e-82) | BBOV_I004500 (2e-51)/(2e-51)	Vbra_12801 (4e-85)/(3e-85) | Vbra_21160 (4e-77)/(6e-78) | Vbra_12406 (0.32)/(1.1)	YBL064C	Yes	Mitochondrial peroxiredoxin with thioredoxin peroxidase activity;has a role in reduction of hydroperoxides;reactivation requires Trr2p and glutathione;induced during respiratory growth and oxidative stress;phosphorylated;protein abundance increases in response to DNA replication stress
TGME49_218720	calcium-dependent protein kinase CDPK6 (CDPK6)	BirA	N	-0.0134829	160933	0	MHSAGISSAWIGGRFISAGRRLYFGEPSTALFFLSKFDICSPRPASSLRGGWPELTFTGC ASSCTSSCFPAVARVSVSRHTPGVRATSLALPISSPPRFASPRSLSRSLHPLSSTFSPFP VDPSNTLALSLPHTDSTLSLSRASGLPSASVLSASLTAAASCLVSPLGSLCRASGGALDR GEVGEKRERGDTGGDSEDASASGGQSPSTSAKAKQASRFKGVGVASGDRERPIRKGRRDS VGGKNREDGHTEEGAGKTRKPQGKEQKASTEAWDLRELILFGRRPERTHTRRETGKSRAT LSSALHRKRGGSKLGLTLASEEAAGKAAQHPRSDTKTCWKERDETVCSSTRGLLPGTVNI PSCQEKTPLDLYRSTPPSPSHSHAFASSPTGVA…	0.117	0.5043	OG5_146625	PF3D7_1122800 (3e-149)/(1e-153)	cgd4_3330 (0.0)/(0.0)	no	Vbra_20471 (0.0)/(0.0) | Vbra_2292 (6e-107)/(1e-108)	no	N/A
TGME49_218790	elongation factor G C-terminus domain-containing protein	BirA	N	-3.30493	93229	0	MDRDGVDMDACLEAVRQRLNAWPLQVNAVYQVPRAVWSNSNSREKRKTHSVAPQAIIDLTDFCTALYPPVSSFLDASSLPVFYSPPPHVLASLLSSAPSSSPSSSPSVFPSSPPSSPTWAWWNDPRISADVKNRRERLVEDLSLLDDAFEQCVAAGTASCMQSAACGSLPDPRDAQAQRGERGERGETEATASELLAFRDEMRAALRRTALQNLAVPVLFGSSFFSRGVTQLLDGISAFLPSPLDRPPLPLVASTRKAPTPPSRPSCFSSCGRFLSPDRQAAAACVAFKVYPDGKGGRIAFVRVLAGRITPRTSLFNSTKNCLESSSSLLQLFRVKADAYHSVAALSSGDIGAIRGLSAVTAGDVLHLASAPSFVLPLLSPFHRPSLCSSTNAASPLFP…	0	0.1136	OG5_241194	no	no	no	no	no	N/A
TGME49_218840	mutS domain protein (MSH1)	Both	N	-1.5077	234150	0	MGGDSVCSDRDQEWRFSSRQEFFCSIASRALRPASGPGAPLRGSASFARYRWKLQTILFS LVCISVEVNARLLMEMFPRQRGCRQGLACSVPQAYWSINALLSANKMHGRTSKSFLQKVA KRDSSCGGWATLGQHQLLDFFSAAARDAAGQLRGCRASLPFLASSRRVAFVVHPDRRLAR PTIQLPHAISDRQTHFPSNASRLSGRFFHTQKRPEAPTRDNLLGPKPSRRAEENCSVLRS SAESCPPPSVAVHPTFLARLPLLSRPASRRLLSFLSFDHPSMVPDSLHMPPLLVFVREQK RLRPDKVLIIQVGDFFEAYGLDAVLLVEYCGLNPMGGKAKAGCPKQNLQQTLDCLTSEGF SVSVFEEFASPVAATPIAPGNRKLRLLTQIVSP…	0.008	0.0151	OG5_236268	PF3D7_1405400 (4e-10)/(7e-15)	no	no	Vbra_3617 (7e-40)/(9e-41)	no	N/A
TGME49_218940	hypothetical protein	BirA	Y	-3.92387	35121	0	MGEKQEEEGEEEKEGKGEGGGEGGREEEDEDGSAPVVSWLRIVEERECHEETDEAPETKI ALPFSAQRSSRGFEARQVEVLVSANSAFLLSVLLASLFLSSSLPSFCPPRFLLSVLLALF KDKMAGDAPAAAAAPQQAGRTASASGVRTPGYLDLVGHSLKATSMDHGMQYSSIYWETSH RTYLPFWASLTQKFSWKIMDDQIRSFLRLPKPVTTEPFVFSSGSPYIRRYFGDADISVPV PLHAPAHFAFVPTGTVSPWEETGMETGPQGAAARGAAATAFRAVLESAWKCDIDEQIKEK LHSRAGAGAFHASGSTGGCPIPTDF	0	0.0003	OG5_150525	PF3D7_0815400 (3e-21)/(7e-21)	no	BBOV_I002640 (1e-25)/(2e-25)	Vbra_4019 (3e-06)/(2e-05)	no	N/A
TGME49_219140	EF-1 guanine nucleotide exchange domain-containing protein	BirA	Y	-0.863004	20734	0	MVTAFATSDELATPCTYYTLTWGDAAAAPKKAAVDDDDFDLFGEESAEDKEAVKKLAESKKKEAEKKKKVVINKSMLVIEVKPADADTDLDDVCKKVKSIQMEGVTWGEGMKKVPVAFGLFKLQVQCVILDDVVNTNALVDEIEEIGMTEEEKQKRRQKEEADDEDDDEEDFGGLVQSAEIVSFNKL	0	0.0409	OG5_132876	PF3D7_0319600 (1e-42)/(2e-39) | PF3D7_0913200 (4e-30)/(2e-27)	no	no	Vbra_8343 (3e-36)/(7e-39)	no	N/A
TGME49_219310	DnaK family protein	BirA	Y	-2.04066	90143	0	MAVIGIDLGSLNSVMATVQRGTVSVVTTELSDRVTPSLVGFTEDRRLMGDHALAQMKSNAKNTCRYFKNILGEVFDASNSHLKKEMELSLNNMAAVSPNNVMGYRVQYRGKEVEFSAERVAAAFLTKLRQVAESSLQKPVSEVVIACPPWCRDANRSALLDAAQIAGLKCLRIISDMAATCLDYGMYRRQHFAADRPHIVAFVGVGHSSTSACIAAFWADRLRILAEVSDCELGGRDMDYEIMKHFASAFEKKTKMNPLSSLKARLKLEDQANKAKKILSANSETSFHVECLMEDEDCSGLLTREVFEELCSKTLVPRMETLLQSLLTKSGLKKEDLFSVEIVGGGTRIPWVQKCISNAFGLELSRTLAADETVARGCALQAAMASASFKVKEYGFGER…	0.013	0.1054	OG5_127167	PF3D7_0708800 (8e-111)/(3e-128)	cgd4_3270 (1e-123)/(2e-128)	BBOV_III004240 (4e-98)/(5e-99)	Vbra_15263 (2e-129)/(4e-164)	YBR169C, YPL106C	No
TGME49_219550	dihydrolipoyllysine-residue succinyltransferase component of oxoglutarate dehydrogenase	Both	N	-4.2439	50126	0	MPVLAAAAAASRRGLSSLLLPVECRPRFSAGVSSAVQAGKKVCSIKSAFSAVARHRSRPL ASLSSLATPSLAFRDARWTSVTSRCFSSAAGAETVVPVPSMGDSITEGSLNEWKKQPGEY VKEGELVAVIDTDKVSVDINAPQAGRIVRFEANAGDTVEVGKPLYVIDPTAQPDPAELAA AAAAAAAPATPVKTEAAKPVSPPEKSSVPQPAPSVSPPKPAPAPKKPASPVVAVQSPGRE EKRVPMSRMRQRIAERLKGAQNTAAMLTTFNECDMGALMAMRSELNPAFQERHGVKMGFV SAFMLASAMAMKKVPEVNAFIEGNEIVYKSHVDISVAVATPTGLMVPVVRDCERKSWPEL EKELAHLAVKARNNQIALEDMAGGTFTISNGGV…	0.677	0.9658	OG5_127362	PF3D7_1320800 (2e-139)/(5e-138)	no	BBOV_IV004840 (5e-126)/(5e-120)	Vbra_8264 (1e-128)/(2e-163)	YDR148C	Yes	Dihydrolipoyl transsuccinylase;component of the mitochondrial alpha-ketoglutarate dehydrogenase complex, which catalyzes the oxidative decarboxylation of alpha-ketoglutarate to succinyl-CoA in the TCA cycle;phosphorylated
TGME49_219682	pyruvate dehydrogenase kinase, putative	Both	N	-0.826031	82163	0	MARIPAMFWSSSAPPRSHFDKKPEGLLRRLSVETSLLSSLPRSSLSHSCLVPLSRCALSC LSSRMRLRLCLSDSSGAAAYAALPRSPPGPLPGSSLLRALPSVPALASASSAPGVLAPSS CSSPLLFPREKKCDTTQMRAVGTGRGQQIVLSKERHDQLLMAEITEFAMRPCRPLTLQEI AYLKGPRTPPRETAAPSLEAPLASSESISPPSSSSPPSSPSSSSSSSPSSSSAFTGAGEG YSVELFLSVELPVRFASRIKQIEAVPLFHQEQLIIQVRQLYVESFKQLRMCAWRNKEEFR KLLKDLKRRHAPIAPLLVTGLRNLKKRFPDIFTDEFVDDFLDGFFLSRIGTEMLTSAYLS PSGIVDTDCDPMQVIKKAAGDAEKLCHYHYGCC…	0.079	0.032	OG5_241171	no	no	no	Vbra_2395 (4e-74)/(5e-92) | Vbra_19403 (4e-62)/(1e-62) | Vbra_10850 (7e-58)/(7e-59) | Vbra_19402 (9e-19)/(1e-17)	no	N/A
TGME49_219850	prolyl-tRNA synthetase (ProRS)	APEX	N	-4.44753	93480	0	MRPGVFSRGFCRPGTLFSPFSLLFSSLWWTLWTRPSTTLAFRASVPRFSRGTACRATDAF LVPELRVESSLLRGCASFRPFASTSLGRQGLGNFPGIQSQASKTLRFPGSSFCQVSACKM ATNSDVSVLSAEEQRREAKALQKLEELGIGYQLHRHAPVATVDAMVKASFRDKGVIAANL FLKEKQRFFLLTVTHDLPIPLKGIAKLLSAPRMRLADEELLGPMLDVSKGSVTPLAAMCD EKKEVTLVFDSAMKKNPDLVVLVHPLHNKATVALKASDLVKFVEACGHSVMWLDVDEAVK LAAAPAGGANKPNAPAGKAPGAKEAVTDSSMLGVTAKKDENFSEWYTQAIVRSEMIEYYD ISGCYIMRPWAFHIWEKVQRFFDDEIKKMGVEN…	0.165	0.9106	OG5_127154	PF3D7_1213800 (0.0)/(0.0)	cgd6_4400 (0.0)/(0.0)	BBOV_IV001390 (0.0)/(0.0)	Vbra_17540 (0.0)/(0.0)	YHR020W	No
TGME49_220100	phosphoribosylpyrophosphate synthetase	APEX	Y	-4.53956	61020	0	MWIGSRSIRSHAGELALARLRARADHLFLDFTAANTSVKKYHFMTSRVSPLLRRPSREQA AAAKYLYASVPPLCQISAATPRRRGADDKRAGGNSRAGNKSSGNEKRHFSFAAAGGLGSV LLCGAPLAGGERRDAAPSSAETEKRNSSASTTTRSSSFFRAPSSSHASFIESKFHFFSRA FSQQPALCQTAAPVPKTDKGRNQQGARPTDDHEEPAHHDSPFWRSQENRPFDRKLGDALL FCGNSNEPLARAVADRLSTKLGKAVVKRFADGEVNIQFADSLRGKDVYIIQPTSTPVNEH LVELLLMISTCRRASAKKITAVIPYYGYARQDRKLSSRVPISAADVARMIEAMGVDRVVA VDLHCGQIQGFFGPRVPVDNLEAQIIGLEYFHH…	0.345	0.658	OG5_126730	PF3D7_1325100 (0.0)/(0.0)	no	BBOV_IV008060 (1e-83)/(2e-84)	Vbra_3977 (0.0)/(0.0)	YBL068W, YER099C, YHL011C	No
[truncated: 340 more rows]

## Sheet: 6. OrthoMCL analyses
			OrthoMCL analysis comparing apicomplexans, chromerids and animals													OrthoMCL analysis comparing apicomplexans, chromerids and all annotated eukaryotes
[truncated: 430 more rows]
