# Supplementary material for: Elucidating the mitochondrial proteome of Toxoplasma gondii reveals the presence of a divergent cytochrome c oxidase
Source: eLife journal article supplement (doi:10.7554/elife.38131), 2018-09-11
Supplement: supp [file elife-38131-supp-v1.zip › elife_poa_e38131_Supplementary_File_2.xlsx]

## Sheet: Sheet1
Pathway ID	Pathway Name	Genes in the bkgd with this pathway	Genes in your result with this pathway	Percent of bkgd Genes in your result	Fold enrichment	Odds ratio	P-value	Benjamini	Bonferroni
ec00020	Citrate cycle (TCA cycle)	27	16	59.3	10.49	12.39	1.04e-10	2.08e-09	2.08e-09
ec00190	Oxidative phosphorylation	51	16	31.4	5.56	6.47	1.54e-07	1.54e-06	3.07e-06
ec00620	Pyruvate metabolism	34	11	32.4	5.73	6.34	1.28e-05	6.89e-05	0.000257
ec00720	Carbon fixation pathways in prokaryotes	21	9	42.9	7.59	8.27	1.38e-05	6.89e-05	0.000276
ec00010	Glycolysis / Gluconeogenesis	39	9	23.1	4.09	4.41	0.000722	0.00289	0.0144
ec00650	Butanoate metabolism	12	5	41.7	7.38	7.73	0.00146	0.00486	0.0291
ec00670	One carbon pool by folate	7	4	57.1	10.12	10.52	0.00189	0.00541	0.0379
ec00640	Propanoate metabolism	24	6	25	4.43	4.66	0.00416	0.0104	0.0833
ec00630	Glyoxylate and dicarboxylate metabolism	17	5	29.4	5.21	5.44	0.00501	0.0111	0.1
ec00480	Glutathione metabolism	27	6	22.2	3.94	4.13	0.00682	0.0136	0.136
ec00400	Phenylalanine, tyrosine and tryptophan biosynthesis	12	4	33.3	5.9	6.12	0.00849	0.0154	0.17
ec00280	Valine, leucine and isoleucine degradation	30	6	20	3.54	3.71	0.0105	0.0162	0.211
ec00195	Photosynthesis	21	5	23.8	4.22	4.39	0.0106	0.0162	0.211
ec00660	C5-Branched dibasic acid metabolism	2	2	100	17.71	18.06	0.0158	0.02	0.316
ec00250	Alanine, aspartate and glutamate metabolism	15	4	26.7	4.72	4.88	0.016	0.02	0.32
ec00760	Nicotinate and nicotinamide metabolism	15	4	26.7	4.72	4.88	0.016	0.02	0.32
ec00680	Methane metabolism	18	4	22.2	3.94	4.06	0.0267	0.0314	0.534
ec00790	Folate biosynthesis	11	3	27.3	4.83	4.95	0.0351	0.0368	0.701
ec00710	Carbon fixation in photosynthetic organisms	20	4	20	3.54	3.65	0.0357	0.0368	0.715
ec00130	Ubiquinone and other terpenoid-quinone biosynthesis	4	2	50	8.85	9.02	0.0368	0.0368	0.737
