# Supplementary material for: Elucidating the mitochondrial proteome of Toxoplasma gondii reveals the presence of a divergent cytochrome c oxidase
Source: eLife journal article supplement (doi:10.7554/elife.38131), 2018-09-11
Supplement: supp [file elife-38131-supp-v1.zip › elife_poa_e38131_Supplementary_File_3.xlsx]

## Sheet: Sheet1
"Expected mitochondrial proteins"
Protein name	general function	proteome	ToxoDB ID
citrate synthase	TCA cycle	Both	TGME49_268890		Key
aconitase/IRP	TCA cycle	Both	TGME49_226730			present in proteome ('true positives')
isocitrate dehydrogenase (NADP+-dependent)	TCA cycle	Both	TGME49_313140			absent from proteome but expected to localise to mitochondrial matrix
alpha-ketogluterate dehydrogenase -E1	TCA cycle	Both	TGME49_244200
dihydrolipoamide succinyltransferase-E2 of alpha-KGHD	TCA cycle	Both	TGME49_219550
lipoamide dehydrogenase - mitochondrial E3	TCA cycle	Both	TGME49_206470
succinyl-CoA sythetase alpha subunit	TCA cycle	Both	TGME49_290600
succinyl-CoA sythetase beta subunit	TCA cycle	APEX	TGME49_309752
succinate dehydrogenase Fe-S subunit	TCA cycle/electron transport	Both	TGME49_215280
succinate dehydrogenase flavoprotein subunit	TCA cycle/electron transport	Both	TGME49_215590
fumarate hydratase class I	TCA cycle	Both	TGME49_267330
malate:quinone oxidoreductase	TCA cycle/electron transport	Both	TGME49_288500
branched-chain alpha keto-acid Dehydrogenase E1-alpha	TCA cycle	APEX	TGME49_239490
branched-chain alpha keto-acid Dehydrogenase E1-beta	TCA cycle	APEX	TGME49_314400
dihydrolipoamide transferase - E2 - of BCKADH	TCA cycle	Both	TGME49_319920
lipoate protein ligase (LplA)	inserts lipoate into E2 proteins	Both	TGME49_271820
single subunit NADH dehydrogenase (NDH2-I)	electron transport	APEX	TGME49_209150
single subunit NADH dehydrogenase (NDH2-II)	electron transport	APEX	TGME49_288830
Dihydroorotate dehydrogenase	pyrimidine biosynthesis/electron transport	Both	TGME49_210790
FAD-linked glycerol-3-phosphate dehydrogenase	electron shuttle/electron transport	APEX	TGME49_263730
mitochondrial hinge protein	complex III electron transport	BirA	TGME49_320140
rieske Fe-S protein	complex III electron transport	Both	TGME49_320220
cytochrome b	complex III electron transport	N/A	TGME49_322210?
cytochrome c1	complex III electron transport	Both	TGME49_246540
cytochrome c reductase 14 kDa SU	complex III assembly	Both	TGME49_288750
BCS1	complex III assembly	Both	TGME49_243490
Cox I	complex IV electron transport	N/A	TGME49_255060?
Cox III	complex IV electron transport	N/A	TGME49_323400?
Cox IIa	complex IV electron transport	BirA	TGME49_310470
Cox IIb	complex IV electron transport	Both	TGME49_226590
Cox V	complex IV electron transport	Both	TGME49_209260
ATP synthase alpha-subunit	complex V	Both	TGME49_204400
ATP synthase beta-subunit	complex V	Both	TGME49_261950
ATP synthase gamma-subunit	complex V	Both	TGME49_231910
ATP synthase delta-subunit	complex V	Both	TGME49_284540
ATP synthase epsilon-subunit	complex V	N/A	TGME49_314820
delta-aminolaevulinic acid synthase (ALAS)	heme biosynthesis	N/A	TGME49_258690
(protoporphyrinogen oxidase (PPO)	heme biosynthesis	Both	TGME49_272490
ferrochelatase (FC)	heme biosynthesis	Both	TGME49_258650
farnesyl pyrophosphate synthase (FPPS)	CoQ biosynthesis	Both	TGME49_224490
Coq1 (octaprenyl pyrophosphate synthase)	CoQ biosynthesis	N/A	TGME49_269430
Coq2 (parahydroxybenzoate polyprenyl transferase)	CoQ biosynthesis	N/A	TGME49_259130
Coq3 (O-methyltransferase)	CoQ biosynthesis	Both	TGME49_266850
Coq4	CoQ biosynthesis	N/A	TGME49_275980
Coq5 (C-methyltransferase)	CoQ biosynthesis	Both	TGME49_295690
Coq8 (ABC1 homologue- misannotated as ABC transporter)	CoQ biosynthesis	BirA	TGME49_203940
NFS	Fe-S synthesis	APEX	TGME49_211090
ISU	Fe-S synthesis	APEX	TGME49_237560
ISA	Fe-S synthesis	Both	TGME49_318170
Isd11	Fe-S synthesis	BirA	TGME49_254800
ferredoxin	electron transport/Fe-S synthesis	APEX	TGME49_240670
ferredoxin--NADP+ reductase	electron transport/Fe-S synthesis	Both	TGME49_261030
superoxide dismutase (Sod2)	antioxidant defence	APEX	TGME49_316330	Brydges and Carruthers (2003) J Cell Sci, 116: 4675-85
Prx3	antioxidant defence	Both	TGME49_230410	Ding et al (2004) Mol Microbiol, 51: 47-61
thioredoxin-like protein TLP1 (TLP1)	antioxidant defence	APEX	TGME49_270120	Ding et al (2004) Mol Microbiol, 51: 47-61
glycine cleavage system H protein	folate biosynthesis/Glycine decarboxylase complex	APEX	TGME49_202960
glycine cleavage system T protein	folate biosynthesis/Glycine decarboxylase complex	Both	TGME49_237470
Hsp70 (Ssc1)	presequence translocase associated motor complex	Both	TGME49_251780	van Dooren et al (2016) J Biol Chem, 291: 19335-50
GrpE (Mge1)	presequence translocase associated motor complex	Both	TGME49_265220	van Dooren et al (2016) J Biol Chem, 291: 19335-50
Tim44	presequence translocase associated motor complex	Both	TGME49_227830	van Dooren et al (2016) J Biol Chem, 291: 19335-50
Pam18	presequence translocase associated motor complex	N/A	TGME49_210810	van Dooren et al (2016) J Biol Chem, 291: 19335-50
MPP alpha subunit	transit peptide cleavage/complex III	Both	TGME49_202680	van Dooren et al (2016) J Biol Chem, 291: 19335-50
MPP beta subunit	transit peptide cleavage/complex III	Both	TGME49_236210	van Dooren et al (2016) J Biol Chem, 291: 19335-50
Cpn60 (Hsp60)	protein folding	Both	TGME49_247550	Toursel et al (2000) Mol Biochem Parasitol, 111: 319-32
Cpn10	protein folding	Both	TGME49_263530
pyruvate kinase II (PyKII)	unknown	Both	TGME49_299070	Saito et al (2008) J Biol Chem, 283: 14041-52
phosphatidylserine decarboxylase	phospholipid synthesis	APEX	TGME49_225550	Hartmann et al (2014) J Biol Chem, 289: 6809-24
propionyl-CoA synthetase/PrpE	methyl citrate cycle	N/A	TGME49_232580	Limenitakis et al (2013) Mol Microbiol, 87: 894-908
2 methylcitrate synthase/PrpC	methyl citrate cycle	N/A	TGME49_263130	Limenitakis et al (2013) Mol Microbiol, 87: 894-908
2-methylisocitrate lyase/PrpB	methyl citrate cycle	N/A	TGME49_293810	Limenitakis et al (2013) Mol Microbiol, 87: 894-908
NADP-dependent succinate-semialdehyde dehydrogenase	GABA shunt	Both	TGME49_257480	MacRae et al (2012) Cell Host Microbe, 12: 682-92
mutS domain protein (MSH1)	DNA repair, monensin sensitivity	Both	TGME49_218840	Garrison and Arrizabalaga (2009) Mol Microbiol, 72: 425-41
DNA-dependent RNA polymerase	transcription	BirA	TGME49_246060
ribosomal protein S5	ribosome	Both	TGME49_285970
ribosomal protein S14	ribosome	BirA	TGME49_277700	Gupta et al (2014) Open Biol, 4: 140045
ribosomal protein S15	ribosome	BirA	TGME49_216040	Gupta et al (2014) Open Biol, 4: 140045
ribosomal protein S18	ribosome	BirA	TGME49_222990	Gupta et al (2014) Open Biol, 4: 140045
ribosomal protein L2	ribosome	BirA	TGME49_254400	top hit outside apicomplexans is to bacterial 50S ribosome subunit L2
ribosomal protein L3	ribosome	BirA	TGME49_230050	Gupta et al (2014) Open Biol, 4: 140045
ribosomal protein L4	ribosome	BirA	TGME49_223660	Gupta et al (2014) Open Biol, 4: 140045
ribosomal protein L7/L12	ribosome	BirA	TGME49_251950	Gupta et al (2014) Open Biol, 4: 140045
ribosomal protein L9	ribosome	BirA	TGME49_214870	top hit outside apicomplexans is to bacterial 50S ribosome subunit L9
ribosomal protein L13	ribosome	BirA	TGME49_225240	Gupta et al (2014) Open Biol, 4: 140045
ribosomal protein L15	ribosome	BirA	TGME49_253800	Gupta et al (2014) Open Biol, 4: 140045
ribosomal protein L19	ribosome	Both	TGME49_313960	Gupta et al (2014) Open Biol, 4: 140045
ribosomal protein L21	ribosome	Both	TGME49_202350	Gupta et al (2014) Open Biol, 4: 140045
ribosomal protein L23	ribosome	BirA	TGME49_260660	Gupta et al (2014) Open Biol, 4: 140045
ribosomal protein L24	ribosome	BirA	TGME49_216010	Gupta et al (2014) Open Biol, 4: 140045
ribosomal protein L25	ribosome	BirA	TGME49_314295	top hit outside apicomplexans is to bacterial 50S ribosome subunit L25
ribosomal protein L28	ribosome	BirA	TGME49_226280	Gupta et al (2014) Open Biol, 4: 140045
ribosomal protein L51	ribosome	BirA	TGME49_289140	top hit outside apicomplexans is to plant mitochondria 50S ribosome subunit L51
EngA/Der	ribosome biogenesis/assembly/maturation	BirA	TGME49_203020	Gupta et al (2014) Open Biol, 4: 140045; homologue of PF3D7_0313500
EngB/YsxC	ribosome biogenesis/assembly/maturation	BirA	TGME49_257390	Gupta et al (2014) Open Biol, 4: 140045; homologue of PF3D7_1442200
elongation factor P	translation	BirA	TGME49_309010
elongation factor Tu	translation	APEX	TGME49_262380
elongation factor Ts protein	translation	APEX	TGME49_209010
elongation factor G	translation	Both	TGME49_260170
ribosome recycling factor (RRF) protein	translation	Both	TGME49_216530
ABC1 protein	translation	BirA	TGME49_203940
adenine nucleotide translocator, putative	solute transport	APEX	TGME49_249900
phosphate carrier, putative	solute transport	APEX	TGME49_278990	Bhaduri-McIntosh and Vaidya (1998) Exp Parasitol, 88:252-4; Plasmodium orthologue imported into heterlogous (rat liver) mitochondria
2-oxoglutarate/malate translocase OMT (OMT)	solute transport	APEX	TGME49_249900	van Dooren et al (2006) FEMS Microbiol Rev, 30: 596-630; mitochondrial in Plasmodium
ICAP2	unknown	Both	TGME49_231410	Sidik et al (2016) Cell, 166: 1423-35
ICAP3	unknown	N/A	TGME49_215430	Sidik et al (2016) Cell, 166: 1423-35
ICAP6	unknown	Both	TGME49_260180	Sidik et al (2016) Cell, 166: 1423-35
ICAP8	unknown	BirA	TGME49_218940	Sidik et al (2016) Cell, 166: 1423-35
ICAP9	unknown	BirA	TGME49_247410	Sidik et al (2016) Cell, 166: 1423-35
ICAP11	unknown	BirA	TGME49_215610	Sidik et al (2016) Cell, 166: 1423-35
ICAP14	unknown	N/A	TGME49_255245	Sidik et al (2016) Cell, 166: 1423-35
ICAP15	unknown	Both	TGME49_282180	Sidik et al (2016) Cell, 166: 1423-35
PEP-carboxykinase I	gluconeogenesis	Both	TGME49_289650	Nitzsche et al (2017) J Biol Chem, 292: 15225-39
"False positives"
Protein name	general function	proteome	ToxoDB ID
chorismate synthase, putative	shikimate pathway	mtBirA*	TGME49_201380	Fitzpatrick et al (2001) Mol Microbiol, 40: 65-75; cytosolic in Plasmodium
alveolin domain containing intermediate filament IMC9 (ALV6)	unknown	mtBirA*	TGME49_226220	Anderson-White et al (2001) Cell Microbiol, 13: 18-31
alveolin domain containing intermediate filament IMC4 (ALV4)	unknown	mtBirA*	TGME49_231630	Anderson-White et al (2001) Cell Microbiol, 13: 18-31
fructose-1,6-bisphosphate aldolase	glycolysis	mtBirA*	TGME49_236040	Fleige et al (2007) Eukaryot Cell, 6: 984-96
autophagy-related protein 3 atg3, putative	autophagy	mtBirA*	TGME49_236110	Besteiro et al (2011) PLoS Pathog, 7: e1002416
rhoptry protein ROP9 (ROP9)	unknown	Both	TGME49_243730	Reichmann et al (2002) Mol Biochem Parasitol, 119: 43-54
microneme protein MIC8 (MIC8)	invasion	mtBirA*	TGME49_245490	Meissner et al (2002) J Cell Sci, 115: 563-74
centrin 2	cell organisation/division	mtBirA*	TGME49_250340	Hu (2008) PLoS Pathog, 4: e10
pyruvate kinase PyK1 (PYKI)	glycolysis	mtBirA*	TGME49_256760	Fleige et al (2007) Eukaryot Cell, 6: 984-96
Acetyl-coenzyme A synthetase 2, putative	acetyl-CoA synthesis	mtBirA*	TGME49_266640	Tymoshenko et al (2015) PLoS Comput Biol, 11: e1004261
dynamin-related protein DRPA (DRPA)	apicoplast division	mtBirA*	TGME49_267800	van Dooren et al (2009) Curr Biol, 19: 267-76
P-type ATPase4, putative	Plasma membrane Na+ regulation	mtBirA*	TGME49_278660	Lehane et al, unpublished
sortilin, putative	secretory protein trafficking	mtBirA*	TGME49_290160	Sloves et al (2012) Cell Host Microbe, 11: 515-27
phosphoglycerate mutase PGMII (PGMII)	glycolysis	mtBirA*	TGME49_297060	Fleige et al (2007) Eukaryot Cell, 6: 984-96
calcium-dependent protein kinase CDPK1 (CDPK1)	microneme secretion	mtBirA*	TGME49_301440	Lourido et al (2010) Nature, 465: 359-62
dynamin-related protein DRPB (DRPB)	secretory protein trafficking	mtBirA*	TGME49_321620	Breinich et al (2009) Curr Biol, 19: 277-86
