# Supplementary material for: Elucidating the mitochondrial proteome of Toxoplasma gondii reveals the presence of a divergent cytochrome c oxidase
Source: eLife journal article supplement (doi:10.7554/elife.38131), 2018-09-11
Supplement: supp [file elife-38131-supp-v1.zip › elife_poa_e38131_Supplementary_File_4.xlsx]

## Sheet: General primers
General primers and templates
Primer name	Primer sequence	Comments
APEX fwd	5’-GACTCCTAGGGGAAAGTCTTACCCAACT
APEX rvs	5’-GACTCATATGGGCATCAGCAAACCCAAG
BirA* fwd	5’-GATCAGATCTAAAATGCCTAGGGGTTCTGGCGGTGACAAGGACAACACCG
BirA* rvs	5’-GATCTCTAGACTTCTCTGCGCTTCTCAGGGAGA
ApiCox25 5' CRISPR fwd	5’-TCACGTGTAAACAGGGGAGTGTTTTAGAGCTAGAAATAGCAAG	sgRNA region specific to the TgApiCox25 is underlined
Universal reverse	5’-AACTTGACATCCCCATTTAC
ApiCox25 5' reg fwd	5’-GCCTGGCATAAAATTCGGGGACTGATTTCTCCACGTCACGTGTAAACAGGGGTTGCAGGCTCCTTCTTCGG	ApiCox25 flanking region is underlined
ApiCox25 5' reg rvs	5’-ACGATCGGCGCTCCGGCGAAGCGGAGTAGTAAAGATGTCCGCAACATCTTGGTTGAAGACAGACGAAAGCAGTTG	ApiCox25 flanking region is underlined
ApiCox25 5' screen fwd	5’-CGTAGGAAAACTGTTCCCAGAGC
ApiCox25 screen rvs	5’-GCACTTCTTCTGAAAGTTGATACG
t7s4 screen fwd	5’-ACGCAGTTCTCGGAAGACG
ApiCox25 comp fwd	5’-CATGGGATCCAAAATGTTGCGGACATCTTTACTACTCC
ApiCox25 comp rvs	5’-CATGCCTAGGGTGAAAGTGAGGTGGCTCCAGTT
Cox2a 3'rep CRISPR fwd	5’- CGAGTCGCCTGTTGACGACGGTTTTAGAGCTAGAAATAGCAAG	sgRNA region specific to the TgCox2a is underlined
Cox2a 3'rep fwd	5’-GACAGTGGTACTGGATCTACGAAGTCGAGTCGCCTGTTGACGACGAaGAGGGTGGAGGTAGCGGTGGTGGAAG	Cox2a flanking region is underlined; lower case is mutation to delete PAM site
Cox2a 3'rep rvs	5’-CTGCCCATTCAACGCTCGGACAGCCGTCCTTTAGGAAACGCATAGGAAGCGCTTCTGTGGGCGGTTATCAGG	Cox2a flanking region is underlined
FLAG tag gBlock	5’-GTGGAGGTAGCGGTGGTGGAAGTGACTACAAAGACCATGACGGTGATTATAAAGATCATGACATCGATTACAAGGATGACGATGACAAGTAGTCCTGATAACCGCCCACAGAAGC	Synthesized as gBlock
Cox2a 3' screen fwd	5’-CTCTTGTACATGCTCGACGAAG
Cox2a 3' screen rvs	5’-AACGACTGTGATTCCAAAACCT
ApiCox25 3'rep CRISPR fwd	5’- TGTCTTCAGTGAAAGTGAGGGTTTTAGAGCTAGAAATAGCAAG	sgRNA region specific to the TgApiCox25 is underlined
ApiCox25 3'rep fwd	5’-GAAATCCCCTCTCTGTTCCTAGAGGCAAACTGGAGCCACCTCACTTTCACGGTGGAGGTAGCGGTGGTGGAAG	ApiCox25 flanking region is underlined
ApiCox25 3'rep rvs	5’-ACACAAGGATCGCATACCATAGCACGCAACACAAACAGTCATTGTTTGAGGCTTCTGTGGGCGGTTATCAGG	ApiCox25 flanking region is underlined
ApiCox25 3'rep screen fwd	5’-GATGAGTCGTCTGTGGTTCATTG

## Sheet: 3' replacment primers
Primers for 3' replacements
ToxoDB Gene ID	Forward Primer	Reverse Primer	Cloning into pgCH	Linearisation before transfection
TGME49_209420	GACTGGATCCGCAGGTCTCGGAGAGAAATCC	GATCCCTAGGCGCAGATCTTGAGGGGAGC	digested with BamHI and AvrII, and ligated into BglII and AvrII sites of pgCH	SphI
TGME49_209870	GACTAGATCTCAGCTCTGCATAAACTTCAACGAC	GATCCCTAGGTTCGACCAGATGTGCAGCAGTTTCAATC	digested with BglII and AvrII, and ligated into equivalent sites of pgCH	PstI
TGME49_210730	GACTAGATCTCAATCTCCTCGACCAACAGACTGC	GATCCCTAGGCAAGATATACTTGCAAAGGTCCGCTT	digested with BglII and AvrII, and ligated into equivalent sites of pgCH	NsiI
TGME49_213420	GACTAGATCTGGTAAGCAAAGACCTTCATGG	GATCCCTAGGATACTCAACTCGAGAAAGCGGGGTATAG	digested with BglII and AvrII, and ligated into equivalent sites of pgCH	PstI
TGME49_217020	GACTGGATCCGGTTTGGTTCTCTCTGTCGAACTG	GATCCCTAGGAGCTGGAGGCGTTGGAAC	digested with BamHI and AvrII, and ligated into BglII and AvrII sites of pgCH	MfeI
TGME49_220100	GATCAGATCTGCGCAAAAAAAATCACTGCG	GATCTCTAGAATACTTAACATTGAAAAGGTCGTTAAGACT	digested with BglII and XbaI, and ligated into BglII and AvrII sites of pgCH	SphI
TGME49_223500	GACTAGATCTGGAAGTCTTTGCCCTCTGCG	GATCCCTAGGCTTTCGAATATTTGCAGCTTTCCC	digested with BglII and AvrII, and ligated into equivalent sites of pgCH	SphI
TGME49_229620	GACTAGATCTGCAGGCTCGTGTGAAGTGTCAG	GACTCCTAGGCAGCCACCCTTTGAGCTGG	digested with BglII and AvrII, and ligated into equivalent sites of pgCH	NsiI
TGME49_232600	GATCAGATCTGCAGTTATTCATAAAATAGAGGTGGC	GATCCCTAGGAGACTCTTCAGACTTTGCCTCTTCG	digested with BglII and AvrII, and ligated into equivalent sites of pgCH	SphI
TGME49_248600	GACTAGATCTCGAACGCAGAACGAGCAAAAG	GACTCCTAGGGCTTGCAGGAACTGCCCG	digested with BglII and AvrII, and ligated into equivalent sites of pgCH	MfeI
TGME49_258100	GTACGGATCCGAGGCTGGGTCGAACTTGATC	GATCCCTAGGGTCTGCCGAAAGGTCTCCC	digested with BamHI and AvrII, and ligated into BglII and AvrII sites of pgCH	SphI
TGME49_259710	GACTAGATCTGACAAAAACAACCTGATTGACTTCG	GACTCCTAGGTCGTCGCTGGACACACTGAAAG	digested with BglII and AvrII, and ligated into equivalent sites of pgCH	MfeI
TGME49_260840	GATCGGATCCCGAGTTGCCTCTGTCAATCCTC	GATCCCTAGGCAGCTTCGGCGGGGG	digested with BamHI and AvrII, and ligated into BglII and AvrII sites of pgCH	BglII
TGME49_263080	GACTAGATCTGAGTTACCAAGTGCAGCGATAGG	GATCCCTAGGATTGGCCTGTCCCTTTTGAGG	digested with BglII and AvrII, and ligated into equivalent sites of pgCH	NsiI
TGME49_263400	GATCAGATCTAAAATGCCTCTGCCTCCTTTTCC	GATCCCTAGGACACCCACCTCCAAGTTTATCC	digested with BglII and AvrII, and ligated into equivalent sites of pgCH	AflII
TGME49_263840	GACTAGATCTGCTTGGTACCGACGGATTTGTCC	CTAGCCTAGGTCGAGTAGGATCTGACCATGCCC	digested with BamHI and AvrII, and ligated into BglII and AvrII sites of pgCH	SphI
TGME49_265360	GACTAGATCTGAAGATGATCTGACACTTATAGGCTCC	GATCCCTAGGTGCTACGAAATCACTAGTACTCTTCCTC	digested with BglII and AvrII, and ligated into equivalent sites of pgCH	PstI
TGME49_264040	GATCGGATCCGGGAGAAATACCTGCGGAGTC	GACTCCTAGGGTGAAAGTGAGGTGGCTCCAG	digested with BamHI and AvrII, and ligated into BglII and AvrII sites of pgCH	NsiI
TGME49_275650	GACTAGATCTCAGCAGCCCGACCAACAG	GATCCCTAGGCGCCTGAGCGACGCCGTTCAC	digested with BglII and AvrII, and ligated into equivalent sites of pgCH	PstI
TGME49_278250	GATCAGATCTCTCTACCTAAGAGTGCTGTGCTGTCT	GATCCCTAGGCTCTTGTTCTGCCCCTGGC	digested with BglII and AvrII, and ligated into equivalent sites of pgCH	SphI
TGME49_278720	GACTGGATCCCGTGGTGTATGTGGAAAACGG	GACTCCTAGGCGCTTGGGTCCCTGTCGC	digested with BglII and AvrII, and ligated into equivalent sites of pgCH	NsiI
TGME49_286120	GATCGGATCCGCTGGCGATTGAGGGAGG	GATCCCTAGGCTGCTCATGCCACTGAATGTG	digested with BamHI and AvrII, and ligated into BglII and AvrII sites of pgCH	BglII
TGME49_290460	CAGTAGATCTCTGAAAGCGGATGCTTGTGAAACATC	GACTCCTAGGGACCGCGCCTAGCTGGGTCTCTTC	digested with BglII and AvrII, and ligated into equivalent sites of pgCH	SphI
TGME49_297810	CTGATATAGAGAATTTGTTGAAATGCACAAGAAGG	GACTCCTAGGCGCAATCTGTTTCTTCTCGC	digested with XbaI and AvrII, and ligated into SpeI and AvrII sites of pgCH	MfeI
TGME49_300030	GACTACTAGTGCGGAAGACGCAAAGGGATT	GACTCCTAGGGGCACTGGATCCACTTGGCTT	digested with SpeI and AvrII, and ligated into equivalent sites of pgCH	BglII
TGME49_316900	GACTGGATCCGGAAAAGCCAATGTATTCTTCGC	GATCCCTAGGCGACAAGGTCCGTGACTTTTTG	digested with BglII and AvrII, and ligated into equivalent sites of pgCH	PstI
TGME49_318400	GATCAGATCTTTGTCTATCCAGTTGTTTCTG	GATCCCTAGGAGACTGAGGCCTGCCGTAGC	digested with BglII and AvrII, and ligated into equivalent sites of pgCH	NsiI
