# Supplementary material for: Elucidating the mitochondrial proteome of Toxoplasma gondii reveals the presence of a divergent cytochrome c oxidase
Source: eLife journal article supplement (doi:10.7554/elife.38131), 2018-09-11
Supplement: supp [file elife-38131-supp-v1.zip › elife_poa_e38131_Supplementary_File_5.xlsx]

## Sheet: Samples Report for ApiCox25
				Normalized Total Precursor Intensity
Protein Description	Accession Number (UniProt)	Predicted Molecular Mass	Fold change (average ApiCox25/average Tom40)	ApiCox25 rep 1	ApiCox25 rep 2	ApiCox25 rep 3	Tom40 rep 1	Tom40 rep 2	Tom40 rep 3	Cox/ApiCox annotation
Uncharacterized protein OS=Toxoplasma gondii (strain ATCC 50861 / VEG) GN=TGVEG_265370 PE=4 SV=1	A0A125YGW3_TOXGV	16 kDa	397.139	1050700000	1080200000	1198000000	3826800	2481000	2074400	ApiCox 16
Cytochrome C family oxidase subunit III subfamily protein (Fragment) OS=Toxoplasma gondii (strain ATCC 50861 / VEG) GN=TGVEG_442760 PE=4 SV=1	V4YI37_TOXGV	17 kDa	365.11	274950000	265220000	291770000	2278600	0	0	CoxIII
Zinc finger CDGSH-type domain-containing protein OS=Toxoplasma gondii (strain ATCC 50861 / VEG) GN=BN1205_057290 PE=4 SV=1	B9PWU0_TOXGV	13 kDa	337.267	433490000	440880000	478990000	3819800	0	192920	ApiCox13
NADH-ubiquinone reductase complex 1 MLRQ subunit OS=Toxoplasma gondii (strain ATCC 50861 / VEG) GN=TGVEG_306670 PE=4 SV=1	A0A125YY22_TOXGV	26 kDa	332.134	2149700000	2811300000	2713000000	12930000	1730800	8444300	ApiCox26
Uncharacterized protein OS=Toxoplasma gondii (strain ATCC 50861 / VEG) GN=BN1205_052180 PE=4 SV=1	B9PYL9_TOXGV	18 kDa	256.304	818520000	854510000	1027000000	5670700	2317600	2546200	ApiCox18
Membrane protein OS=Toxoplasma gondii (strain ATCC 50861 / VEG) GN=BN1205_102930 PE=4 SV=1	B9PPA5_TOXGV	14 kDa	252.802	552400000	806770000	734260000	0	3210100	5070800	ApiCox14
Uncharacterized protein OS=Toxoplasma gondii (strain ATCC 50861 / VEG) GN=TGVEG_297810 PE=4 SV=1	V4Z393_TOXGV	30 kDa	165.575	3297800000	3563100000	4114900000	32908000	13194000	20187000	ApiCox30
Putative transmembrane protein OS=Toxoplasma gondii (strain ATCC 50861 / VEG) GN=BN1205_025590 PE=4 SV=1	B6KJ93_TOXGV	35 kDa	141.033	2135600000	2720500000	2638600000	37866000	7149800	8125500	ApiCox35
Uncharacterized protein OS=Toxoplasma gondii (strain ATCC 50861 / VEG) GN=BN1205_049070 PE=4 SV=1	B9QNT6_TOXGV	25 kDa	133.089	2193200000	1811900000	2265900000	24833000	10091000	12195000	ApiCox25
Cytochrome c oxidase, putative OS=Toxoplasma gondii (strain ATCC 50861 / VEG) GN=BN1205_039200 PE=4 SV=1	B6KPB2_TOXGV	35 kDa	114.236	3935800000	4113300000	4339100000	51792000	26234000	30418000	Cox5b
Cg8 family protein OS=Toxoplasma gondii (strain ATCC 50861 / VEG) GN=BN1205_072080 PE=4 SV=1	B9PLQ5_TOXGV	24 kDa	113.604	2796100000	2646200000	2930800000	38380000	15953000	19371000	ApiCox23
Cytochrome c oxidase subunit 2 OS=Toxoplasma gondii (strain ATCC 50861 / VEG) GN=BN1205_067650 PE=4 SV=1	A0A0F7V207_TOXGV	34 kDa	96.9473	1214700000	1212400000	1130400000	28173000	3775800	4746400	Cox2a
Putative transmembrane protein OS=Toxoplasma gondii (strain ATCC 50861 / VEG) GN=BN1205_033740 PE=4 SV=1	B9PSC6_TOXGV	25 kDa	74.9576	1247500000	1438100000	1334900000	41798000	8508300	3330700	ApiCox24
Cytochrome c oxidase subunit II, putative OS=Toxoplasma gondii (strain ATCC 50861 / VEG) GN=BN1205_094550 PE=4 SV=1	A0A0F7V9B5_TOXGV	21 kDa	73.983	1658000000	2178700000	2388700000	65967000	9363700	8815700	Cox2b
Putative transmembrane protein OS=Toxoplasma gondii (strain ATCC 50861 / VEG) GN=BN1205_004010 PE=4 SV=1	B6KH21_TOXGV	19 kDa	67.5428	2157300000	2541500000	2378600000	65129000	16503000	23152000	ApiCox19
Putative transmembrane protein OS=Toxoplasma gondii (strain ATCC 50861 / VEG) GN=BN1205_049183 PE=4 SV=1	V4YUF5_TOXGV	25 kDa	4.77452	7007200	7363100	11954000	1298400	2124300	2090800
Dihydrolipoamide acetyltransferase component of pyruvate dehydrogenase complex OS=Toxoplasma gondii (strain ATCC 50861 / VEG) GN=TGVEG_319920 PE=3 SV=1	V4Z729_TOXGV	70 kDa	4.62867	13165000	13258000	14388000	5804000	1077500	1935500
40S ribosomal protein S15, putative OS=Toxoplasma gondii (strain ATCC 50861 / VEG) GN=BN1205_034990 PE=3 SV=1	B9PSN8_TOXGV	17 kDa	4.21309	4032300	2719700	2184800	0	0	2121200
Ubiquinol-cytochrome C reductase complex 14 kDa protein, putative OS=Toxoplasma gondii (strain ATCC 50861 / VEG) GN=BN1205_082510 PE=4 SV=1	B9PTW7_TOXGV	27 kDa	3.12134	3133000	5901600	7109600	0	1873100	3299100
Uncharacterized protein OS=Toxoplasma gondii (strain ATCC 50861 / VEG) GN=TGVEG_260230 PE=4 SV=1	V4ZDV1_TOXGV	89 kDa	3.04048	3199400	4014200	1107900	2736900	0	0
60S ribosomal protein L22, putative OS=Toxoplasma gondii (strain ATCC 50861 / VEG) GN=BN1205_091810 PE=4 SV=1	B9PNF3_TOXGV	15 kDa	2.46275	2669800	2713900	1656800	2858800	0	0
cAMP-dependent protein kinase regulatory subunit OS=Toxoplasma gondii (strain ATCC 50861 / VEG) GN=BN1205_089740 PE=4 SV=1	A0A0F7UTU3_TOXGV	43 kDa	2.06027	5768900	3111800	5541000	2480600	2347700	2171600
Putative peptidase M16 family potein (Fragment) OS=Toxoplasma gondii (strain ATCC 50861 / VEG) GN=TGVEG_236210B PE=4 SV=1	V4Z6F8_TOXGV	21 kDa	2.0318	4679400	2361100	2690600	3335800	0	1453600
Ribosomal protein RPS25 OS=Toxoplasma gondii (strain ATCC 50861 / VEG) GN=TGVEG_231140 PE=4 SV=1	A0A125YRD7_TOXGV	19 kDa	1.99829	2591600	1911400	1929900	0	1452900	1766300
TPR domain-containing protein OS=Toxoplasma gondii (strain ATCC 50861 / VEG) GN=BN1205_015880 PE=4 SV=1	B9Q5A1_TOXGV	114 kDa	1.86315	9014000	6035700	4016100	5157500	3197700	1877900
ATP synthase F1, delta subunit protein OS=Toxoplasma gondii (strain ATCC 50861 / VEG) GN=BN1205_032460 PE=3 SV=1	B9PSZ9_TOXGV	28 kDa	1.9415	1420500	1494300	1180400	0	0	2109300
Alveolin domain containing intermediate filament IMC4 OS=Toxoplasma gondii (strain ATCC 50861 / VEG) GN=BN1205_024040 PE=4 SV=1	A0A0F7UX90_TOXGV	50 kDa	1.75079	2172000	910900	3235700	0	1901200	1707800
60S ribosomal protein L17, putative OS=Toxoplasma gondii (strain ATCC 50861 / VEG) GN=BN1205_105210 PE=3 SV=1	B9Q363_TOXGV	22 kDa	1.79072	4197100	2586900	2496400	0	1047000	4135500
60S ribosomal protein L12, putative OS=Toxoplasma gondii (strain ATCC 50861 / VEG) GN=BN1205_057810 PE=3 SV=1	B9PWY7_TOXGV	18 kDa	1.75525	5583700	5662800	4502500	8972500	0	0
AGC kinase OS=Toxoplasma gondii (strain ATCC 50861 / VEG) GN=BN1205_066990 PE=3 SV=1	B9PMK9_TOXGV	39 kDa	1.70849	0	1462200	1054400	0	0	1473000
Uncharacterized protein OS=Toxoplasma gondii (strain ATCC 50861 / VEG) GN=TGVEG_232280 PE=4 SV=1	A0A125YTK1_TOXGV	30 kDa	1.64214	10241000	9205900	8427900	8766900	3182300	5025500
Uncharacterized protein OS=Toxoplasma gondii (strain ATCC 50861 / VEG) GN=BN1205_050510 PE=4 SV=1	B9Q285_TOXGV	30 kDa	1.39677	932790	403870	476350	0	0	1298000
60S acidic ribosomal protein P0 OS=Toxoplasma gondii (strain ATCC 50861 / VEG) GN=BN1205_071330 PE=3 SV=1	A0A0F7VC17_TOXGV	34 kDa	1.323	14430000	11407000	12142000	4215600	8485100	16006000
60S ribosomal protein L13 OS=Toxoplasma gondii (strain ATCC 50861 / VEG) GN=TGVEG_263050 PE=3 SV=1	A0A125YII2_TOXGV	40 kDa	1.27738	2593100	2831900	951530	2128100	2863800	0
40S ribosomal protein S9, putative OS=Toxoplasma gondii (strain ATCC 50861 / VEG) GN=BN1205_003310 PE=3 SV=1	B9PQU8_TOXGV	22 kDa	1.22576	23163000	17624000	19003000	21107000	14928000	12743000
60S acidic ribosomal protein P2, putative OS=Toxoplasma gondii (strain ATCC 50861 / VEG) GN=BN1205_093870 PE=3 SV=1	B9PJK1_TOXGV	12 kDa	1.23892	26070000	18684000	20112000	8556700	16149000	27651000
Ribosomal protein RPL14 OS=Toxoplasma gondii (strain ATCC 50861 / VEG) GN=TGVEG_267060 PE=4 SV=1	A0A125YYW0_TOXGV	18 kDa	1.15141	11028000	5526600	11537000	11543000	3632000	9222600
Macrophage migration inhibitory factor,putative OS=Toxoplasma gondii (strain ATCC 50861 / VEG) GN=BN1205_083780 PE=4 SV=1	A0A0F7V470_TOXGV	12 kDa	1.24773	1665200	3126400	2422800	0	0	5782000
Ribosomal protein RPL27 (Fragment) OS=Toxoplasma gondii (strain ATCC 50861 / VEG) GN=TGVEG_262690 PE=4 SV=1	A0A125YU34_TOXGV	16 kDa	1.20327	4142100	2780600	2115300	0	2464300	5046900
Uncharacterized protein OS=Toxoplasma gondii (strain ATCC 50861 / VEG) GN=TGVEG_310420 PE=4 SV=1	A0A125YTH1_TOXGV	23 kDa	1.0689	7446800	10200000	9989400	7658100	9455700	8741100
Lipoate-protein ligase A, putative OS=Toxoplasma gondii (strain ATCC 50861 / VEG) GN=BN1205_019270 PE=4 SV=1	V4ZW02_TOXGV	52 kDa	1.05016	1389300	2113900	1733200	3331300	0	1655000
Tubulin beta chain OS=Toxoplasma gondii (strain ATCC 50861 / VEG) GN=BN1205_052280 PE=3 SV=1	B9PYN1_TOXGV	50 kDa	1.06113	10672000	11911000	0	0	21282000	0
Mitochondrial-processing peptidase alpha subunit, putative OS=Toxoplasma gondii (strain ATCC 50861 / VEG) GN=BN1205_046660 PE=4 SV=1	B9PUJ6_TOXGV	62 kDa	1.00849	16865000	17520000	21206000	19665000	16352000	19106000
SAG-related sequence SRS52A OS=Toxoplasma gondii (strain ATCC 50861 / VEG) GN=BN1205_100430 PE=4 SV=1	B6K9I7_TOXGV	34 kDa	0.979448	4082500	4622800	5568000	5630100	5062300	3880400
60S ribosomal protein L23, putative OS=Toxoplasma gondii (strain ATCC 50861 / VEG) GN=BN1205_096100 PE=3 SV=1	B9PK53_TOXGV	15 kDa	1.04735	2354500	3910100	2802200	5050700	2144000	1462200
Myosin A OS=Toxoplasma gondii (strain ATCC 50861 / VEG) GN=BN1205_061910 PE=4 SV=1	B9Q788_TOXGV	93 kDa	0.861456	58115000	72506000	63397000	94276000	55487000	75458000
60S ribosomal protein L7a, putative OS=Toxoplasma gondii (strain ATCC 50861 / VEG) GN=BN1205_073140 PE=4 SV=1	B9PKF7_TOXGV	31 kDa	0.886667	25009000	22545000	19924000	30175000	23052000	22876000
Ribosomal protein RPL7 OS=Toxoplasma gondii (strain ATCC 50861 / VEG) GN=TGVEG_314810 PE=4 SV=1	B9PIY5_TOXGV	30 kDa	0.90337	13663000	14137000	14634000	19605000	11195000	16173000
Methyltransferase-like protein1 OS=Toxoplasma gondii (strain ATCC 50861 / VEG) GN=BN1205_094150 PE=4 SV=1	B9PJM6_TOXGV	25 kDa	0.904795	1117400	1879700	1320400	0	1542700	3229100
Uncharacterized protein OS=Toxoplasma gondii (strain ATCC 50861 / VEG) GN=TGVEG_218940 PE=4 SV=1	B9PQJ7_TOXGV	35 kDa	0.872782	1905300	2670200	1572200	5510700	0	1533100
40S ribosomal protein S8 OS=Toxoplasma gondii (strain ATCC 50861 / VEG) GN=BN1205_006420 PE=3 SV=1	B6KGK3_TOXGV	24 kDa	0.759889	6172800	4219700	4151400	7770600	5639400	5729500
Ribosomal protein RPS23 OS=Toxoplasma gondii (strain ATCC 50861 / VEG) GN=BN1205_025830 PE=3 SV=1	B9PHL8_TOXGV	16 kDa	0.759258	5193000	5103100	5183800	8603000	5419700	6365500
60S ribosomal protein L30, putative OS=Toxoplasma gondii (strain ATCC 50861 / VEG) GN=BN1205_023410 PE=3 SV=1	B9PGL1_TOXGV	12 kDa	0.830796	6789500	6790800	6466300	9791200	6931300	7406900
Ribosomal protein RPS15A OS=Toxoplasma gondii (strain ATCC 50861 / VEG) GN=TGVEG_234450 PE=4 SV=1	A0A125YJX3_TOXGV	27 kDa	0.758786	4124000	5812200	3159000	9700900	3058200	4499000
Heat shock protein 90, putative OS=Toxoplasma gondii (strain ATCC 50861 / VEG) GN=BN1205_014980 PE=3 SV=1	A0A0F7UMP6_TOXGV	95 kDa	0.797623	3006700	3178100	1117600	3128800	3227200	2799200
60S ribosomal protein L10, putative OS=Toxoplasma gondii (strain ATCC 50861 / VEG) GN=BN1205_082480 PE=4 SV=1	B9PTX0_TOXGV	25 kDa	0.794252	0	759990	1675900	0	0	3066900
ADP ribosylation factor 1 OS=Toxoplasma gondii (strain ATCC 50861 / VEG) GN=BN1205_055320 PE=3 SV=1	V5B319_TOXGV	21 kDa	0.848145	1256100	1063900	0	657080	0	2078300
Deoxyuridine 5'-triphosphate nucleotidohydrolase, putative OS=Toxoplasma gondii (strain ATCC 50861 / VEG) GN=BN1205_022400 PE=4 SV=1	B6KK00_TOXGV	18 kDa	0.789188	1804400	0	0	0	0	2286400
Aminotransferase, putative OS=Toxoplasma gondii (strain ATCC 50861 / VEG) GN=BN1205_049080 PE=4 SV=1	B9QNT7_TOXGV	71 kDa	0.714573	24207000	19858000	16713000	30996000	23464000	30595000
Ribosomal protein RPS10 OS=Toxoplasma gondii (strain ATCC 50861 / VEG) GN=BN1205_055450 PE=4 SV=1	B9PX63_TOXGV	17 kDa	0.665661	64207000	54034000	47044000	130940000	49018000	68344000
RNA recognition motif domain-containing protein OS=Toxoplasma gondii (strain ATCC 50861 / VEG) GN=BN1205_015220 PE=4 SV=1	B9PGV5_TOXGV	66 kDa	0.717023	17533000	16274000	14197000	33565000	13378000	20006000
40S ribosomal protein S4 OS=Toxoplasma gondii (strain ATCC 50861 / VEG) GN=BN1205_040740 PE=3 SV=1	B9PXE4_TOXGV	36 kDa	0.740142	5138100	4233300	3936200	7181700	3887400	6910700
Eukaryotic translation initiation factor 3 subunit 5, putative OS=Toxoplasma gondii (strain ATCC 50861 / VEG) GN=BN1205_068970 PE=3 SV=1	B9PN38_TOXGV	38 kDa	0.737329	2654900	3306400	2234700	3295300	3874800	3945700
40S ribosomal protein S13, putative OS=Toxoplasma gondii (strain ATCC 50861 / VEG) GN=BN1205_017665 PE=3 SV=1	A0A125YSG6_TOXGV	17 kDa	0.731584	7576200	4234600	8655700	8991700	9993900	8990000
60S ribosomal protein L8, putative OS=Toxoplasma gondii (strain ATCC 50861 / VEG) GN=BN1205_045200 PE=3 SV=1	B9PU56_TOXGV	28 kDa	0.709019	2627900	3587100	2310600	2971200	2060000	6993300
GAP45 OS=Toxoplasma gondii (strain ATCC 50861 / VEG) GN=BN1205_064420 PE=4 SV=1	A0A0F7V9A2_TOXGV	27 kDa	0.718476	1298200	3396400	3789600	4927000	2964400	3917200
Nuclear transport factor 2 (Ntf2) domain-containing protein OS=Toxoplasma gondii (strain ATCC 50861 / VEG) GN=BN1205_103690 PE=4 SV=1	B9PP21_TOXGV	84 kDa	0.684867	1481400	1795000	1372200	3071700	1395300	2320600
60S ribosomal protein L26, putative OS=Toxoplasma gondii (strain ATCC 50861 / VEG) GN=BN1205_003390 PE=4 SV=1	B6KH63_TOXGV	16 kDa	0.659868	0	3074600	2761600	0	2441900	6402600
Putative RNA-binding protein OS=Toxoplasma gondii (strain ATCC 50861 / VEG) GN=BN1205_047620 PE=4 SV=1	B9QG18_TOXGV	29 kDa	0.681062	1008000	2398900	3021300	0	3105200	6333300
Ubiquinol-cytochrome C family reductase UQCRX/QCR9-like protein OS=Toxoplasma gondii (strain ATCC 50861 / VEG) GN=BN1205_047565 PE=4 SV=1	A0A125YZ24_TOXGV	15 kDa	0.66167	741750	0	914080	0	0	2502500
Ribosomal protein L32, putative OS=Toxoplasma gondii (strain ATCC 50861 / VEG) GN=BN1205_108820 PE=4 SV=1	B6KLD4_TOXGV	16 kDa	0.713408	3485400	3579100	1570800	5659100	3105300	3339900
Bis(5'-adenosyl)-triphosphatase, putative OS=Toxoplasma gondii (strain ATCC 50861 / VEG) GN=BN1205_011210 PE=4 SV=1	B9QIC9_TOXGV	25 kDa	0.722567	1132900	1633900	279830	0	2183200	2033200
T-complex protein 1 subunit delta OS=Toxoplasma gondii (strain ATCC 50861 / VEG) GN=BN1205_020320 PE=3 SV=1	B6KDJ0_TOXGV	59 kDa	0.726431	988330	489310	624650	1167700	0	1726300
Heat shock protein HSP29 OS=Toxoplasma gondii (strain ATCC 50861 / VEG) GN=BN1205_083360 PE=3 SV=1	B9PTP1_TOXGV	30 kDa	0.656009	633000	772120	709290	1770800	858570	593770
Rhoptry protein ROP5 OS=Toxoplasma gondii (strain ATCC 50861 / VEG) GN=TGVEG_308090 PE=4 SV=1	V4Z6U4_TOXGV	61 kDa	0.557509	121250000	181450000	198450000	413040000	142670000	343200000
Heat shock protein 60 OS=Toxoplasma gondii (strain ATCC 50861 / VEG) GN=BN1205_004250 PE=3 SV=1	B9PPQ1_TOXGV	61 kDa	0.610863	37319000	33704000	39038000	86780000	40187000	53206000
NAD/NADP octopine/nopaline dehydrogenase, alpha-helical domain-containing protein OS=Toxoplasma gondii (strain ATCC 50861 / VEG) GN=BN1205_083830 PE=4 SV=1	V4ZJ48_TOXGV	48 kDa	0.632805	29365000	35132000	24895000	67665000	26067000	47531000
Guanine nucleotide-binding protein OS=Toxoplasma gondii (strain ATCC 50861 / VEG) GN=BN1205_037410 PE=4 SV=1	A0A0F7VB49_TOXGV	35 kDa	0.611954	24573000	18370000	22161000	50422000	22045000	33920000
Rhoptry kinase family protein ROP17 OS=Toxoplasma gondii (strain ATCC 50861 / VEG) GN=BN1205_075890 PE=4 SV=1	B6KB88_TOXGV	69 kDa	0.554927	11260000	12505000	12717000	40273000	11580000	13889000
FAD Malate-dehydrogenase (MDH-FAD) OS=Toxoplasma gondii (strain ATCC 50861 / VEG) GN=BN1205_082260 PE=4 SV=1	B9QDS4_TOXGV	60 kDa	0.582907	6277600	6914600	6366500	18362000	8637400	6554300
60S acidic ribosomal protein P1, putative OS=Toxoplasma gondii (strain ATCC 50861 / VEG) GN=BN1205_074110 PE=3 SV=1	B9PKQ4_TOXGV	19 kDa	0.570798	3889700	5983000	6576500	12656000	8158800	8003100
40s ribosomal protein S14, putative OS=Toxoplasma gondii (strain ATCC 50861 / VEG) GN=BN1205_049265 PE=3 SV=1	A0A125YXW4_TOXGV	16 kDa	0.570203	4668800	6183600	3709900	9837100	4925700	10776000
40S ribosomal protein S2, putative OS=Toxoplasma gondii (strain ATCC 50861 / VEG) GN=BN1205_106930 PE=3 SV=1	B9PZF2_TOXGV	29 kDa	0.6304	2803900	3278700	2829300	7605300	1725900	4805700
Ribosomal protein L5, putative OS=Toxoplasma gondii (strain ATCC 50861 / VEG) GN=BN1205_011140 PE=3 SV=1	B9PV52_TOXGV	35 kDa	0.565518	4120000	3189500	1929200	8701500	2230900	5404300
(3R)-hydroxymyristoyl ACP dehydrase, putative OS=Toxoplasma gondii (strain ATCC 50861 / VEG) GN=BN1205_058970 PE=4 SV=1	A0A0F7UUN0_TOXGV	25 kDa	0.573482	2718900	3082200	3460000	8030500	3662300	4456100
Ribosomal protein RPS16 OS=Toxoplasma gondii (strain ATCC 50861 / VEG) GN=TGVEG_263040 PE=3 SV=1	B6KC70_TOXGV	24 kDa	0.623129	3408200	3713200	3275500	5373600	6435500	4875900
Uncharacterized protein OS=Toxoplasma gondii (strain ATCC 50861 / VEG) GN=BN1205_024640 PE=4 SV=1	V4ZPQ9_TOXGV	156 kDa	0.552912	729340	776870	932520	2212700	0	2198000
Glycan synthetase, putative OS=Toxoplasma gondii (strain ATCC 50861 / VEG) GN=BN1205_038560 PE=4 SV=1	B9QKN1_TOXGV	189 kDa	0.640709	169510	114380	2052200	1736600	0	1909500
Putative transmembrane protein OS=Toxoplasma gondii (strain ATCC 50861 / VEG) GN=BN1205_043360 PE=4 SV=1	B9Q006_TOXGV	32 kDa	0.597135	749310	0	1103600	3103000	0	0
Alveolin domain containing intermediate filament IMC1 OS=Toxoplasma gondii (strain ATCC 50861 / VEG) GN=BN1205_024030 PE=4 SV=1	A0A0F7V263_TOXGV	70 kDa	0.559541	0	354760	0	634020	0	0
Putative ubiquinol cytochrome c oxidoreductase OS=Toxoplasma gondii (strain ATCC 50861 / VEG) GN=BN1205_011400 PE=4 SV=1	V4ZBR1_TOXGV	55 kDa	0.532542	28551000	26604000	25424000	82118000	30459000	38733000
Glyceraldehyde-3-phosphate dehydrogenase OS=Toxoplasma gondii (strain ATCC 50861 / VEG) GN=TGVEG_289690 PE=3 SV=1	A0A125YJ41_TOXGV	53 kDa	0.456681	33473000	36968000	35087000	88556000	63716000	78804000
Uncharacterized protein OS=Toxoplasma gondii (strain ATCC 50861 / VEG) GN=BN1205_024160 PE=4 SV=1	B6KJK9_TOXGV	65 kDa	0.506692	20416000	13266000	17351000	48907000	20429000	31382000
2-oxoglutarate dehydrogenase, putative OS=Toxoplasma gondii (strain ATCC 50861 / VEG) GN=BN1205_103920 PE=4 SV=1	A0A125YTY5_TOXGV	124 kDa	0.463235	11405000	7929300	6828300	18680000	19282000	18516000
Acid phosphatase GAP50 OS=Toxoplasma gondii (strain ATCC 50861 / VEG) GN=BN1205_070530 PE=4 SV=1	A0A0F7VDV9_TOXGV	47 kDa	0.476602	19702000	27233000	23380000	73992000	41083000	32459000
Phospholipase, patatin family protein OS=Toxoplasma gondii (strain ATCC 50861 / VEG) GN=TGVEG_232600 PE=4 SV=1	A0A125YYX1_TOXGV	71 kDa	0.518353	11878000	9746100	13924000	32062000	15118000	21399000
Microneme protein MIC1 OS=Toxoplasma gondii (strain ATCC 50861 / VEG) GN=BN1205_084920 PE=4 SV=1	B6KL08_TOXGV	49 kDa	0.48846	11419000	21802000	6737000	42786000	19978000	19040000
Microneme protein 10 OS=Toxoplasma gondii (strain ATCC 50861 / VEG) GN=BN1205_001390 PE=4 SV=1	B9PRE4_TOXGV	23 kDa	0.480842	21295000	59758000	48096000	71089000	72660000	124840000
MIC2-associated protein M2AP OS=Toxoplasma gondii (strain ATCC 50861 / VEG) GN=BN1205_030950 PE=4 SV=1	B9QN70_TOXGV	35 kDa	0.507045	9895700	7800800	12102000	28923000	17075000	12771000
Myosin light chain MLC1 OS=Toxoplasma gondii (strain ATCC 50861 / VEG) GN=BN1205_076770 PE=4 SV=1	A0A0F7V1A1_TOXGV	24 kDa	0.516179	24476000	25515000	33263000	77780000	52861000	30648000
Putative chaperonin cpn60 OS=Toxoplasma gondii (strain ATCC 50861 / VEG) GN=BN1205_090700 PE=3 SV=1	B6KFE8_TOXGV	72 kDa	0.463694	5396000	6615700	4674300	13935000	9936900	12113000
Trypsin domain-containing protein OS=Toxoplasma gondii (strain ATCC 50861 / VEG) GN=TGVEG_262920 PE=4 SV=1	V4YUS0_TOXGV	105 kDa	0.470121	3991100	2879300	4104000	12448000	5645500	5250300
40S ribosomal protein S3a OS=Toxoplasma gondii (strain ATCC 50861 / VEG) GN=BN1205_022930 PE=3 SV=1	B9PGG2_TOXGV	29 kDa	0.466428	5540000	6451900	4704300	16453000	8874900	10468000
60S ribosomal protein L18a OS=Toxoplasma gondii (strain ATCC 50861 / VEG) GN=BN1205_072060 PE=3 SV=1	B9PLQ2_TOXGV	21 kDa	0.457161	5993900	7324900	6323600	18447000	10010000	14509000
Ribosomal protein OS=Toxoplasma gondii (strain ATCC 50861 / VEG) GN=BN1205_030320 PE=3 SV=1	B9PZT4_TOXGV	25 kDa	0.52823	13024000	13272000	11960000	27146000	23109000	22168000
FUSE-binding protein 2 / KH-type splicing regulatory protein OS=Toxoplasma gondii (strain ATCC 50861 / VEG) GN=BN1205_037620 PE=4 SV=1	B6KT44_TOXGV	100 kDa	0.515406	2853500	1818300	2067500	5546900	3559500	3969300
40S ribosomal protein S24 OS=Toxoplasma gondii (strain ATCC 50861 / VEG) GN=TGVEG_215460 PE=3 SV=1	A0A125YKH1_TOXGV	30 kDa	0.549921	4461800	4971200	4131800	10524000	6177900	7964900
Ribosomal protein RPL6 OS=Toxoplasma gondii (strain ATCC 50861 / VEG) GN=TGVEG_313390 PE=4 SV=1	A0A125YZB5_TOXGV	31 kDa	0.493013	9221500	11092000	7301800	39438000	7985200	8590100
60S ribosomal protein L3, putative OS=Toxoplasma gondii (strain ATCC 50861 / VEG) GN=BN1205_068250 PE=3 SV=1	B9PMX8_TOXGV	44 kDa	0.463731	3018400	3419100	2521600	7505700	4810300	7003600
Mitogen-activated protein kinase OS=Toxoplasma gondii (strain ATCC 50861 / VEG) GN=TGVEG_233010 PE=3 SV=1	V4Z6R8_TOXGV	72 kDa	0.456512	2661800	2305000	2363600	6344000	4946600	4766800
Uncharacterized protein OS=Toxoplasma gondii (strain ATCC 50861 / VEG) GN=BN1205_049910 PE=4 SV=1	B9Q0N4_TOXGV	14 kDa	0.490753	2347900	0	2481700	6041100	0	3800100
ARM repeats containing protein OS=Toxoplasma gondii (strain ATCC 50861 / VEG) GN=BN1205_073260 PE=4 SV=1	B9PKH1_TOXGV	31 kDa	0.451173	417850	681440	763560	2671300	1457600	0
Rhoptry neck protein RON2 OS=Toxoplasma gondii (strain ATCC 50861 / VEG) GN=TGVEG_300100 PE=4 SV=1	V4YYL5_TOXGV	166 kDa	0.455279	561450	0	0	0	0	1233200
Phosphatidylserine decarboxylase proenzyme, mitochondrial OS=Toxoplasma gondii (strain ATCC 50861 / VEG) GN=TGVEG_225550 PE=3 SV=1	V4ZB70_TOXGV	48 kDa	0.505941	1414300	639770	0	2680200	1379700	0
Heat shock protein 90, putative OS=Toxoplasma gondii (strain ATCC 50861 / VEG) GN=BN1205_104350 PE=3 SV=1	B9QJS4_TOXGV	97 kDa	0.418521	131770000	128690000	130460000	414770000	202790000	316490000
Succinate dehydrogenase [ubiquinone] flavoprotein subunit, mitochondrial OS=Toxoplasma gondii (strain ATCC 50861 / VEG) GN=BN1205_030210 PE=3 SV=1	B9PZU5_TOXGV	73 kDa	0.416654	139270000	161830000	130770000	424050000	248200000	364270000
ATP synthase subunit beta OS=Toxoplasma gondii (strain ATCC 50861 / VEG) GN=BN1205_072870 PE=3 SV=1	A0A0F7UVN4_TOXGV	60 kDa	0.448745	143620000	124320000	110110000	406020000	212660000	223780000
Catalase OS=Toxoplasma gondii (strain ATCC 50861 / VEG) GN=BN1205_023390 PE=3 SV=1	B6KJS2_TOXGV	57 kDa	0.351885	84191000	107200000	85215000	469340000	157230000	159500000
Bifunctional GMP synthase/glutamine amidotransferase protein OS=Toxoplasma gondii (strain ATCC 50861 / VEG) GN=TGVEG_230450 PE=3 SV=1	B6KJD3_TOXGV	62 kDa	0.376324	54663000	57495000	44890000	194600000	99931000	122790000
Putative aminopeptidase N OS=Toxoplasma gondii (strain ATCC 50861 / VEG) GN=TGVEG_224350 PE=4 SV=1	B9Q7I4_TOXGV	157 kDa	0.380064	28658000	16273000	23723000	77280000	47361000	55997000
Uncharacterized protein OS=Toxoplasma gondii (strain ATCC 50861 / VEG) GN=BN1205_015840 PE=4 SV=1	B9PH44_TOXGV (+1)	61 kDa	0.357522	23314000	21978000	18403000	77511000	38980000	61666000
Phosphoribosylpyrophosphate synthetase OS=Toxoplasma gondii (strain ATCC 50861 / VEG) GN=BN1205_087410 PE=4 SV=1	B9QPX7_TOXGV	61 kDa	0.3595	38569000	29967000	31353000	119160000	69877000	88818000
Heat shock protein OS=Toxoplasma gondii (strain ATCC 50861 / VEG) GN=BN1205_000570 PE=3 SV=1	B6KHU4_TOXGV	78 kDa	0.360769	21621000	17592000	20250000	100260000	25339000	39224000
Integral membrane protein, DUF56 family protein,putative OS=Toxoplasma gondii (strain ATCC 50861 / VEG) GN=BN1205_101020 PE=4 SV=1	A0A125YV32_TOXGV	18 kDa	0.412602	80164000	79743000	69665000	328920000	109790000	117690000
Succinate dehydrogenase [ubiquinone] iron-sulfur subunit, mitochondrial OS=Toxoplasma gondii (strain ATCC 50861 / VEG) GN=BN1205_030620 PE=3 SV=1	B9PZR3_TOXGV	39 kDa	0.357594	27948000	47335000	41277000	156430000	67836000	101690000
Putative peptidase M16 family potein (Fragment) OS=Toxoplasma gondii (strain ATCC 50861 / VEG) GN=TGVEG_236210A PE=4 SV=1	V4YRR7_TOXGV	36 kDa	0.36055	22645000	13426000	17417000	75775000	31056000	41520000
Microneme protein MIC4 OS=Toxoplasma gondii (strain ATCC 50861 / VEG) GN=BN1205_040160 PE=4 SV=1	B9PXJ3_TOXGV	63 kDa	0.395615	11066000	23940000	13915000	57873000	26448000	39337000
DnaJ domain-containing protein OS=Toxoplasma gondii (strain ATCC 50861 / VEG) GN=BN1205_095340 PE=3 SV=1	A0A125YKU7_TOXGV	47 kDa	0.365302	14424000	15786000	12557000	57740000	22942000	36391000
Pyrroline-5-carboxylate reductase (Fragment) OS=Toxoplasma gondii (strain ATCC 50861 / VEG) GN=TGVEG_236070 PE=3 SV=1	V4YRT0_TOXGV	36 kDa	0.405391	38439000	32228000	32460000	115920000	64165000	74304000
Iron-containing superoxide dismutase OS=Toxoplasma gondii (strain ATCC 50861 / VEG) GN=BN1205_101430 PE=4 SV=1	A0A0F7VAX6_TOXGV	31 kDa	0.443764	21779000	21543000	23748000	67560000	31184000	52395000
Tubulin beta chain OS=Toxoplasma gondii (strain ATCC 50861 / VEG) GN=BN1205_085930 PE=3 SV=1	B9Q1T8_TOXGV	50 kDa	0.357261	10599000	10553000	8547100	39229000	22199000	21702000
Rhoptry protein ROP7 OS=Toxoplasma gondii (strain ATCC 50861 / VEG) GN=BN1205_050030 PE=4 SV=1	A0A0F7UNS7_TOXGV	63 kDa	0.352775	14278000	22526000	17069000	94815000	21527000	36370000
Subtilisin SUB1 OS=Toxoplasma gondii (strain ATCC 50861 / VEG) GN=BN1205_045170 PE=4 SV=1	V4YYL6_TOXGV	87 kDa	0.384079	6540500	10802000	8967700	30164000	15570000	22768000
Aconitate hydratase ACN/IRP OS=Toxoplasma gondii (strain ATCC 50861 / VEG) GN=BN1205_067770 PE=4 SV=1	B9Q836_TOXGV	115 kDa	0.411083	5250000	5598400	5582600	16984000	10084000	12902000
Cytochrome C1, putative OS=Toxoplasma gondii (strain ATCC 50861 / VEG) GN=BN1205_005450 PE=4 SV=1	A0A125YTU4_TOXGV	46 kDa	0.445842	7757300	11860000	10720000	25748000	16261000	26036000
Uncharacterized protein OS=Toxoplasma gondii (strain ATCC 50861 / VEG) GN=BN1205_089150 PE=4 SV=1	B9Q1K1_TOXGV	35 kDa	0.412026	12404000	7446600	10271000	41256000	14122000	17728000
Uncharacterized protein OS=Toxoplasma gondii (strain ATCC 50861 / VEG) GN=BN1205_056220 PE=4 SV=1	B9QIT1_TOXGV	15 kDa	0.424174	29071000	32652000	29477000	89771000	55744000	69491000
Microneme protein 2 OS=Toxoplasma gondii (strain ATCC 50861 / VEG) GN=BN1205_047640 PE=4 SV=1	A0A0F7UZH2_TOXGV	83 kDa	0.435875	3577100	3930200	3686200	12427000	6373300	6880200
40S ribosomal protein SA OS=Toxoplasma gondii (strain ATCC 50861 / VEG) GN=BN1205_080500 PE=3 SV=1	B9Q1A8_TOXGV	32 kDa	0.378079	5091200	3611200	4880100	14080000	10556000	11289000
Eukaryotic translation initiation factor 3 subunit K OS=Toxoplasma gondii (strain ATCC 50861 / VEG) GN=BN1205_072805 PE=3 SV=1	A0A125YTI3_TOXGV	30 kDa	0.410014	5276100	6657600	4854300	14079000	8834900	18031000
Myosin heavy chain, putative OS=Toxoplasma gondii (strain ATCC 50861 / VEG) GN=BN1205_076490 PE=4 SV=1	B6KB46_TOXGV	23 kDa	0.445479	7404700	6151000	5862400	27317000	4539300	11733000
Ribosomal protein RPL23A OS=Toxoplasma gondii (strain ATCC 50861 / VEG) GN=BN1205_035880 PE=3 SV=1	A0A125YU31_TOXGV	19 kDa	0.383399	7179300	5964000	4286800	17255000	15551000	12656000
6,7-dihydropteridine reductase OS=Toxoplasma gondii (strain ATCC 50861 / VEG) GN=BN1205_033130 PE=4 SV=1	B9QGY1_TOXGV	34 kDa	0.35481	4034200	5579800	5851800	19625000	11922000	12042000
Rhoptry protein ROP4 OS=Toxoplasma gondii (strain ATCC 50861 / VEG) GN=TGVEG_295125 PE=4 SV=1	V4Z117_TOXGV	40 kDa	0.357305	14307000	25602000	22113000	109140000	23732000	40711000
60S ribosomal protein L9, putative OS=Toxoplasma gondii (strain ATCC 50861 / VEG) GN=BN1205_032480 PE=4 SV=1	B9PT01_TOXGV	21 kDa	0.411676	6254400	6244400	6349800	18532000	11605000	15648000
40S ribosomal protein S17, putative OS=Toxoplasma gondii (strain ATCC 50861 / VEG) GN=BN1205_040350 PE=3 SV=1	A0A0F7UNF9_TOXGV	15 kDa	0.411821	6112000	5100000	6751900	22379000	8961600	12280000
Cupin 4 family protein, related OS=Toxoplasma gondii (strain ATCC 50861 / VEG) GN=BN1205_090450 PE=4 SV=1	B6KFH2_TOXGV	56 kDa	0.399016	3245800	2402400	2129700	10088000	2408500	6996200
Rhoptry protein ROP5 OS=Toxoplasma gondii (strain ATCC 50861 / VEG) GN=TGVEG_442220 PE=4 SV=1	V4Z6U8_TOXGV	61 kDa	0.436566	89222000	142170000	128880000	365870000	139200000	320170000
60S ribosomal protein L18, putative OS=Toxoplasma gondii (strain ATCC 50861 / VEG) GN=BN1205_007800 PE=4 SV=1	B6KV50_TOXGV	21 kDa	0.419197	5986600	6818600	4076800	9867200	12704000	17701000
Ribosomal protein RPS19 OS=Toxoplasma gondii (strain ATCC 50861 / VEG) GN=TGVEG_212290 PE=4 SV=1	A0A125YMR9_TOXGV	35 kDa	0.446333	6267800	5459000	4896700	20864000	7279500	9101100
SAG-related sequence SRS57 OS=Toxoplasma gondii (strain ATCC 50861 / VEG) GN=BN1205_069910 PE=4 SV=1	A0A0F7V6G5_TOXGV	42 kDa	0.393027	3706900	1357800	2430400	9796100	6282200	2991900
NADH dehydrogenase (NDH2-II) OS=Toxoplasma gondii (strain ATCC 50861 / VEG) GN=BN1205_082690 PE=4 SV=1	B9PTW2_TOXGV	72 kDa	0.403961	1048000	1490800	1846600	5050600	3160100	2645300
GAP40 OS=Toxoplasma gondii (strain ATCC 50861 / VEG) GN=BN1205_001980 PE=4 SV=1	B9PRA3_TOXGV	43 kDa	0.432798	3217400	6224000	3832000	15245000	9016900	6406900
Aminomethyltransferase, mitochondrial, putative OS=Toxoplasma gondii (strain ATCC 50861 / VEG) GN=BN1205_059770 PE=4 SV=1	B9Q7A8_TOXGV	92 kDa	0.374522	806610	1026700	501350	1631800	1922900	2679000
Uncharacterized protein OS=Toxoplasma gondii (strain ATCC 50861 / VEG) GN=BN1205_083710 PE=4 SV=1	B9QE54_TOXGV	24 kDa	0.353488	3107800	1848700	1563300	9683600	5273100	3487500
60s ribosomal protein L31, putative OS=Toxoplasma gondii (strain ATCC 50861 / VEG) GN=BN1205_080490 PE=4 SV=1	B9Q1A7_TOXGV	14 kDa	0.433061	4248200	2918400	2943900	12312000	4685200	6349400
Putative transmembrane protein OS=Toxoplasma gondii (strain ATCC 50861 / VEG) GN=BN1205_094440 PE=4 SV=1	B9PJQ2_TOXGV	25 kDa	0.356788	2464300	2253200	2098000	0	8391400	10711000
Uncharacterized protein OS=Toxoplasma gondii (strain ATCC 50861 / VEG) GN=BN1205_006430 PE=4 SV=1	B9PQ52_TOXGV	15 kDa	0.439045	0	3137200	3136400	6171000	2255100	5863100
Fop carboxy-terminal duplication domain protein OS=Toxoplasma gondii (strain ATCC 50861 / VEG) GN=BN1205_054360 PE=4 SV=1	B9QHN7_TOXGV	25 kDa	0.390953	0	436190	877020	0	1671200	1687800
Thiamin pyrophosphokinase, catalytic domain-containing protein OS=Toxoplasma gondii (strain ATCC 50861 / VEG) GN=BN1205_030640 PE=4 SV=1	V4YSI1_TOXGV	89 kDa	0.355069	552770	452380	340810	0	2417700	1373000
Uncharacterized protein OS=Toxoplasma gondii (strain ATCC 50861 / VEG) GN=BN1205_002050 PE=4 SV=1	B6KHI8_TOXGV	36 kDa	0.435663	1593300	1002600	0	1570000	1700700	2687800
Putative 23S rRNA (Adenine(1618)-N(6))-methyltransferase OS=Toxoplasma gondii (strain ATCC 50861 / VEG) GN=BN1205_022890 PE=4 SV=1	A0A0F7V2G0_TOXGV	66 kDa	0.350831	641710	0	536610	1780500	721650	856500
Eukaryotic translation initiation factor 5A OS=Toxoplasma gondii (strain ATCC 50861 / VEG) GN=BN1205_000540 PE=3 SV=1	A0A0F7V824_TOXGV	17 kDa	0.262403	244780000	244180000	264360000	1390500000	737920000	742430000
Heat shock protein 70, putative OS=Toxoplasma gondii (strain ATCC 50861 / VEG) GN=BN1205_021100 PE=3 SV=1	A0A0F7V4M1_TOXGV	72 kDa	0.303785	84385000	85572000	80125000	386270000	200240000	236710000
Elongation factor 1-alpha OS=Toxoplasma gondii (strain ATCC 50861 / VEG) GN=BN1205_013060 PE=3 SV=1	A0A0F7US18_TOXGV	49 kDa	0.335197	62641000	72203000	56956000	227560000	147080000	197560000
Enolase 2 OS=Toxoplasma gondii (strain ATCC 50861 / VEG) GN=BN1205_015860 PE=3 SV=1	B9PH46_TOXGV	52 kDa	0.274743	30495000	32061000	28683000	142310000	93057000	96722000
Aminotransferase, class V superfamily protein OS=Toxoplasma gondii (strain ATCC 50861 / VEG) GN=TGVEG_300120 PE=4 SV=1	B9QQB8_TOXGV	90 kDa	0.270544	28969000	23530000	23025000	136180000	62953000	80023000
ATP synthase subunit alpha OS=Toxoplasma gondii (strain ATCC 50861 / VEG) GN=TGVEG_204400 PE=3 SV=1	V5BCJ1_TOXGV	62 kDa	0.321235	59584000	48921000	43571000	238150000	102230000	133030000
Eukaryotic translation initiation factor 3 subunit L OS=Toxoplasma gondii (strain ATCC 50861 / VEG) GN=BN1205_020700 PE=3 SV=1	B9PFX5_TOXGV	75 kDa	0.259051	13491000	12102000	13439000	59495000	39490000	51688000
Cysteine-tRNA synthetase (CysRS) OS=Toxoplasma gondii (strain ATCC 50861 / VEG) GN=TGVEG_299810 PE=3 SV=1	A0A125YZ67_TOXGV	102 kDa	0.2708	24864000	18838000	11261000	86477000	52541000	63947000
Elongation factor 2, putative OS=Toxoplasma gondii (strain ATCC 50861 / VEG) GN=BN1205_043820 PE=4 SV=1	B6KID3_TOXGV	93 kDa	0.310881	15318000	12899000	9237900	52698000	29890000	37892000
Myosin D OS=Toxoplasma gondii (strain ATCC 50861 / VEG) GN=BN1205_049730 PE=4 SV=1	B6KC84_TOXGV	91 kDa	0.251766	12096000	14935000	15419000	75308000	46120000	47181000
Citrate synthase OS=Toxoplasma gondii (strain ATCC 50861 / VEG) GN=BN1205_015900 PE=3 SV=1	B9Q5A3_TOXGV	60 kDa	0.291645	78502000	59146000	58953000	341880000	125240000	206990000
Chorismate synthase, putative OS=Toxoplasma gondii (strain ATCC 50861 / VEG) GN=BN1205_048030 PE=3 SV=1	B9QG39_TOXGV	58 kDa	0.272949	18044000	21191000	12918000	96627000	44240000	50205000
40S ribosomal protein S7, putative OS=Toxoplasma gondii (strain ATCC 50861 / VEG) GN=BN1205_092410 PE=4 SV=1	B9PNL1_TOXGV	23 kDa	0.302328	19114000	15719000	16599000	90314000	38108000	41698000
Microneme protein MIC3 OS=Toxoplasma gondii (strain ATCC 50861 / VEG) GN=TGVEG_319560 PE=4 SV=1	V4YND8_TOXGV	41 kDa	0.268465	18930000	29070000	4938300	76558000	30179000	90452000
Uncharacterized protein OS=Toxoplasma gondii (strain ATCC 50861 / VEG) GN=BN1205_108120 PE=4 SV=1	A0A0F7V4Z6_TOXGV	32 kDa	0.322714	75379000	88470000	89788000	408520000	164830000	212600000
Peroxiredoxin family protein/glutaredoxin,putative OS=Toxoplasma gondii (strain ATCC 50861 / VEG) GN=BN1205_033835 PE=4 SV=1	A0A125YPC3_TOXGV	31 kDa	0.295421	38031000	23477000	35101000	138160000	86341000	102520000
Pyruvate kinase PyKII OS=Toxoplasma gondii (strain ATCC 50861 / VEG) GN=BN1205_105190 PE=4 SV=1	B6KVA2_TOXGV	107 kDa	0.295276	5856300	6585500	7684800	30918000	15121000	22123000
ATP-dependent RNA helicase, putative OS=Toxoplasma gondii (strain ATCC 50861 / VEG) GN=BN1205_067220 PE=3 SV=1	B9PMM2_TOXGV	79 kDa	0.282155	9770000	7642800	7255200	39792000	21304000	26331000
Rhoptry protein ROP8 OS=Toxoplasma gondii (strain ATCC 50861 / VEG) GN=TGVEG_363030 PE=4 SV=1	V5B6B7_TOXGV	67 kDa	0.26562	15771000	19573000	19975000	104180000	41916000	62168000
Apical membrane antigen 1 OS=Toxoplasma gondii (strain ATCC 50861 / VEG) GN=AMA1 PE=1 SV=1	AMA1_TOXGV	63 kDa	0.319556	4861800	6795800	7993500	32396000	14233000	14866000
Malate dehydrogenase MDH OS=Toxoplasma gondii (strain ATCC 50861 / VEG) GN=TGVEG_318430 PE=3 SV=1	V4Z6Z1_TOXGV	55 kDa	0.314732	8399300	5773800	5198000	31985000	14149000	15414000
Peroxiredoxin 3 OS=Toxoplasma gondii (strain ATCC 50861 / VEG) GN=BN1205_025170 PE=4 SV=1	A0A0F7V1V9_TOXGV	31 kDa	0.265985	15341000	9871100	11575000	67455000	33620000	37230000
Dense granule protein 3 OS=Toxoplasma gondii (strain ATCC 50861 / VEG) GN=BN1205_068180 PE=4 SV=1	A0A0F7V5E7_TOXGV	24 kDa	0.308237	12685000	22220000	26069000	75720000	46416000	75679000
Deoxyhypusine synthase OS=Toxoplasma gondii (strain ATCC 50861 / VEG) GN=BN1205_061760 PE=4 SV=1	B6KM84_TOXGV	50 kDa	0.278662	4147400	4848700	2640100	23472000	9115900	9169500
Ribosomal protein RPL4 OS=Toxoplasma gondii (strain ATCC 50861 / VEG) GN=TGVEG_309120 PE=4 SV=1	A0A125YJY9_TOXGV	49 kDa	0.295007	3573900	4934300	2528000	12259000	10597000	14554000
3-hydroxyacyl-CoA dehydrogenase, NAD binding domain-containing protein OS=Toxoplasma gondii (strain ATCC 50861 / VEG) GN=BN1205_023680 PE=4 SV=1	B6KJQ6_TOXGV	54 kDa	0.257177	6181700	5001900	5619600	32246000	15758000	17333000
Gbp1p protein, putative OS=Toxoplasma gondii (strain ATCC 50861 / VEG) GN=BN1205_072100 PE=4 SV=1	B9PLQ7_TOXGV	32 kDa	0.31276	5707300	5565100	2924400	17972000	12682000	14738000
40S ribosomal protein S18, putative OS=Toxoplasma gondii (strain ATCC 50861 / VEG) GN=BN1205_065930 PE=3 SV=1	B9PMB3_TOXGV	18 kDa	0.309752	9273900	8328800	7797600	47967000	14829000	19206000
Uncharacterized protein OS=Toxoplasma gondii (strain ATCC 50861 / VEG) GN=BN1205_043120 PE=4 SV=1	B9PZY8_TOXGV	23 kDa	0.274445	22442000	23019000	18568000	132330000	51628000	49346000
Serine protease OS=Toxoplasma gondii (strain ATCC 50861 / VEG) GN=BN1205_084140 PE=4 SV=1	B9QE96_TOXGV	103 kDa	0.313354	5191900	4358400	7060000	32193000	5476100	15339000
Eukaryotic translation initiation factor 4A OS=Toxoplasma gondii (strain ATCC 50861 / VEG) GN=BN1205_001330 PE=3 SV=1	A0A0F7VFL4_TOXGV	47 kDa	0.297882	3088400	2693000	2132400	7718800	9444200	9403900
Glycoprotein OS=Toxoplasma gondii (strain ATCC 50861 / VEG) GN=BN1205_031090 PE=4 SV=1	B9PZL6_TOXGV	31 kDa	0.295112	13413000	2262700	2533400	31263000	5729300	24710000
40S ribosomal protein S5, putative OS=Toxoplasma gondii (strain ATCC 50861 / VEG) GN=BN1205_102420 PE=3 SV=1	B9PPE8_TOXGV	22 kDa	0.329026	5812600	2754500	6570700	26752000	8826900	10429000
Calcium-transporting ATPase, putative OS=Toxoplasma gondii (strain ATCC 50861 / VEG) GN=BN1205_025160 PE=3 SV=1	B6KJD0_TOXGV	119 kDa	0.255196	2877100	1887100	2365600	14356000	6299200	7283300
Ribosomal protein RPS3 OS=Toxoplasma gondii (strain ATCC 50861 / VEG) GN=TGVEG_232300 PE=4 SV=1	A0A125YYN8_TOXGV	29 kDa	0.294868	8446600	6394200	3558100	33379000	12629000	16389000
Fructose-1,6-bisphosphatase, putative OS=Toxoplasma gondii (strain ATCC 50861 / VEG) GN=BN1205_004290 PE=3 SV=1	A0A0F7VES8_TOXGV	42 kDa	0.315532	4889100	2884900	3704500	15584000	8707300	12087000
Peroxiredoxin OS=Toxoplasma gondii (strain ATCC 50861 / VEG) GN=BN1205_006520 PE=4 SV=1	A0A0F7V741_TOXGV	22 kDa	0.329286	6917700	2369400	2617900	13881000	11253000	11020000
40S ribosomal protein S6 OS=Toxoplasma gondii (strain ATCC 50861 / VEG) GN=BN1205_008650 PE=3 SV=1	B9PVR5_TOXGV	29 kDa	0.253249	4731200	5389200	4968700	30682000	13018000	15882000
Dynamin-like protein, putative OS=Toxoplasma gondii (strain ATCC 50861 / VEG) GN=BN1205_058930 PE=3 SV=1	B9Q341_TOXGV	96 kDa	0.292333	1133200	1236700	1339800	4454400	3795500	4440100
40S ribosomal protein S12 OS=Toxoplasma gondii (strain ATCC 50861 / VEG) GN=BN1205_044050 PE=3 SV=1	B9Q056_TOXGV	15 kDa	0.28743	3800700	5618100	2992700	18941000	12081000	12159000
Pyruvate dehydrogenase E1 component subunit alpha OS=Toxoplasma gondii (strain ATCC 50861 / VEG) GN=BN1205_006220 PE=4 SV=1	B9QC91_TOXGV	67 kDa	0.29316	2048100	981520	917960	5213100	4401000	3851500
Histone H4 OS=Toxoplasma gondii (strain ATCC 50861 / VEG) GN=BN1205_092350 PE=3 SV=1	B9PNK6_TOXGV	11 kDa	0.333482	8323600	14256000	6206200	12802000	53827000	19690000
SAG-related sequence SRS51 OS=Toxoplasma gondii (strain ATCC 50861 / VEG) GN=TGVEG_308840 PE=4 SV=1	A0A125YTX9_TOXGV	50 kDa	0.277791	2687700	2136300	1869700	7345600	7939400	8811200
Phosphoglycerate mutase OS=Toxoplasma gondii (strain ATCC 50861 / VEG) GN=BN1205_053330 PE=4 SV=1	B9PYX4_TOXGV	56 kDa	0.340345	1714300	997860	1699600	6028100	2818100	4116400
60s ribosomal protein L33-A, putative OS=Toxoplasma gondii (strain ATCC 50861 / VEG) GN=BN1205_002620 PE=4 SV=1	B9PR43_TOXGV	13 kDa	0.260706	1171300	1091500	1367500	6845200	5705900	1373800
Putative ATP synthase OS=Toxoplasma gondii (strain ATCC 50861 / VEG) GN=TGVEG_226000 PE=4 SV=1	B6KEJ0_TOXGV	19 kDa	0.322595	7986800	8882900	8555300	37384000	20857000	20573000
Ribosomal protein L21, putative OS=Toxoplasma gondii (strain ATCC 50861 / VEG) GN=BN1205_006195 PE=4 SV=1	A0A125YMU1_TOXGV	18 kDa	0.319196	1013800	1332600	707830	3511200	2867600	3189700
Dihydroorotate dehydrogenase OS=Toxoplasma gondii (strain ATCC 50861 / VEG) GN=BN1205_008750 PE=4 SV=1	B9QHU4_TOXGV	65 kDa	0.301314	804890	1475300	726350	3925700	2839900	3212500
Uncharacterized protein OS=Toxoplasma gondii (strain ATCC 50861 / VEG) GN=BN1205_100740 PE=4 SV=1	B9PJ63_TOXGV	16 kDa	0.336705	7305800	6059600	5317700	0	33014000	22474000
D-3-phosphoglycerate dehydrogenase OS=Toxoplasma gondii (strain ATCC 50861 / VEG) GN=BN1205_091750 PE=3 SV=1	B9PNE7_TOXGV	65 kDa	0.317927	2503100	1067000	0	2607200	3291400	5330700
Putative transmembrane protein OS=Toxoplasma gondii (strain ATCC 50861 / VEG) GN=BN1205_083770 PE=4 SV=1	B9QE60_TOXGV	27 kDa	0.325432	827140	3674600	3380100	11792000	4396100	8031500
60S ribosomal protein L36 OS=Toxoplasma gondii (strain ATCC 50861 / VEG) GN=BN1205_036110 PE=3 SV=1	B9PNQ2_TOXGV	11 kDa	0.348752	3910600	2951900	4032500	0	16041000	15199000
Bis(5'-nucleosyl)-tetraphosphatase, putative OS=Toxoplasma gondii (strain ATCC 50861 / VEG) GN=BN1205_066500 PE=4 SV=1	B6KEE2_TOXGV	24 kDa	0.329708	1180000	1511400	2477400	7929100	3465500	4282300
Putative transmembrane protein OS=Toxoplasma gondii (strain ATCC 50861 / VEG) GN=BN1205_098700 PE=4 SV=1	B9PIN1_TOXGV	22 kDa	0.296568	725220	1533100	1347300	3487000	4836900	3833900
Glycyl-tRNA synthetase OS=Toxoplasma gondii (strain ATCC 50861 / VEG) GN=BN1205_077460 PE=4 SV=1	B9QBW5_TOXGV	86 kDa	0.294062	2449300	893430	1545900	7401300	4756900	4466300
Rhoptry protein ROP2A OS=Toxoplasma gondii (strain ATCC 50861 / VEG) GN=BN1205_030050 PE=4 SV=1	B9QMZ2_TOXGV	65 kDa	0.326613	0	4561400	5194700	22576000	0	7294500
Vacuolar protein sorting-associated protein 35 OS=Toxoplasma gondii (strain ATCC 50861 / VEG) GN=BN1205_102760 PE=3 SV=1	B6KFQ5_TOXGV	96 kDa	0.290749	605770	0	0	0	902280	1181200
Peptidyl-prolyl isomerase OS=Toxoplasma gondii (strain ATCC 50861 / VEG) GN=BN1205_099250 PE=4 SV=1	B6K996_TOXGV	64 kDa	0.25237	1821100	0	0	1772100	2155100	3288800
Lysine decarboxylase domain-containing protein OS=Toxoplasma gondii (strain ATCC 50861 / VEG) GN=BN1205_060750 PE=4 SV=1	B9Q6L3_TOXGV	44 kDa	0.26367	655460	0	0	0	1583000	902910
Uncharacterized protein OS=Toxoplasma gondii (strain ATCC 50861 / VEG) GN=TGVEG_227030 PE=4 SV=1	A0A125YJ57_TOXGV	19 kDa	0.33351	0	0	377700	0	0	1132500
Dihydrolipoamide acetyltransferase component of pyruvate dehydrogenase complex OS=Toxoplasma gondii (strain ATCC 50861 / VEG) GN=BN1205_000210 PE=3 SV=1	V4ZM53_TOXGV	97 kDa	0.311516	0	0	784740	0	1395300	1123800
Putative T-complex protein 1, epsilon subunit (TCP-1-epsilon) OS=Toxoplasma gondii (strain ATCC 50861 / VEG) GN=BN1205_047080 PE=3 SV=1	B9PUM9_TOXGV	59 kDa	0.34111	880800	0	0	0	1590600	991560
Pyrophosphate--fructose 6-phosphate 1-phosphotransferase OS=Toxoplasma gondii (strain ATCC 50861 / VEG) GN=BN1205_067980 PE=3 SV=1	B9Q857_TOXGV	131 kDa	0.210028	523480000	504030000	463920000	3522600000	1722000000	1856500000
Chaperonin protein BiP OS=Toxoplasma gondii (strain ATCC 50861 / VEG) GN=BN1205_095730 PE=3 SV=1	A0A0F7V8D8_TOXGV	73 kDa	0.239963	108330000	113070000	104150000	675430000	321150000	360090000
Dihydropteroate synthase OS=Toxoplasma gondii (strain ATCC 50861 / VEG) GN=BN1205_074700 PE=4 SV=1	B6KBG5_TOXGV	83 kDa	0.184883	110760000	84988000	81809000	706930000	369880000	424450000
Ethylene inducible protein, putative OS=Toxoplasma gondii (strain ATCC 50861 / VEG) GN=BN1205_060090 PE=3 SV=1	A0A125YYG1_TOXGV	33 kDa	0.203841	81672000	102570000	91902000	512070000	418250000	424380000
AAA family protein OS=Toxoplasma gondii (strain ATCC 50861 / VEG) GN=TGVEG_211690 PE=4 SV=1	V4ZB36_TOXGV	167 kDa	0.170757	11657000	13304000	11675000	112760000	47304000	54487000
SAG-related sequence SRS29B OS=Toxoplasma gondii (strain ATCC 50861 / VEG) GN=TGVEG_233460 PE=4 SV=1	V4Z6M2_TOXGV	35 kDa	0.215407	70292000	77822000	93644000	554100000	314880000	253350000
Shikimate dehydrogenase substrate binding domain-containing protein OS=Toxoplasma gondii (strain ATCC 50861 / VEG) GN=TGVEG_307040 PE=4 SV=1	A0A125YJI5_TOXGV	349 kDa	0.176546	7543600	6408000	2925000	52001000	18293000	25299000
NTPase II (Fragment) OS=Toxoplasma gondii (strain ATCC 50861 / VEG) GN=TGVEG_277270 PE=3 SV=1	V4YI32_TOXGV	42 kDa	0.150034	33427000	29638000	33731000	278220000	166850000	200090000
Putative KH domain protein (Fragment) OS=Toxoplasma gondii (strain ATCC 50861 / VEG) GN=TGVEG_280370 PE=4 SV=1	V5BD66_TOXGV	79 kDa	0.178701	15750000	16525000	10712000	118330000	56985000	65238000
Aldehyde dehydrogenase OS=Toxoplasma gondii (strain ATCC 50861 / VEG) GN=TGVEG_222160 PE=3 SV=1	A0A125YJH2_TOXGV	54 kDa	0.180781	19971000	16590000	16310000	131830000	66560000	94069000
Thioredoxin reductase OS=Toxoplasma gondii (strain ATCC 50861 / VEG) GN=BN1205_093780 PE=3 SV=1	B6KA42_TOXGV	71 kDa	0.163263	6292300	8671400	8917500	63573000	37278000	45423000
Eukaryotic translation initiation factor 3 subunit 10, putative OS=Toxoplasma gondii (strain ATCC 50861 / VEG) GN=BN1205_047740 PE=4 SV=1	B9PUT9_TOXGV	119 kDa	0.169749	5389600	6858300	5796100	42964000	24644000	38690000
10 kDa chaperonin, putative OS=Toxoplasma gondii (strain ATCC 50861 / VEG) GN=BN1205_021320 PE=3 SV=1	A0A0F7V4K0_TOXGV	40 kDa	0.217296	13139000	10246000	18831000	66712000	49365000	78202000
ADP/ATP carrier, putative OS=Toxoplasma gondii (strain ATCC 50861 / VEG) GN=BN1205_001930 PE=3 SV=1	B9PRA8_TOXGV	35 kDa	0.209649	12840000	12188000	9015800	91117000	31975000	39293000
Fumarate hydratase OS=Toxoplasma gondii (strain ATCC 50861 / VEG) GN=TGVEG_267330 PE=4 SV=1	V5BD96_TOXGV	84 kDa	0.204869	7013300	6301100	6005600	36916000	25493000	31895000
Isocitrate dehydrogenase OS=Toxoplasma gondii (strain ATCC 50861 / VEG) GN=TGVEG_313140 PE=4 SV=1	A0A125YST2_TOXGV	68 kDa	0.187087	7635800	7820200	9721400	66621000	32593000	35362000
Aspartate carbamoyltransferase OS=Toxoplasma gondii (strain ATCC 50861 / VEG) GN=BN1205_084770 PE=3 SV=1	B6KKZ3_TOXGV	47 kDa	0.212459	4012400	5091400	4700500	31082000	14951000	18941000
6-phosphogluconate dehydrogenase, decarboxylating OS=Toxoplasma gondii (strain ATCC 50861 / VEG) GN=BN1205_069740 PE=3 SV=1	B9Q3G7_TOXGV	55 kDa	0.153962	5728000	5249900	5509600	45082000	26818000	35188000
14-3-3 protein OS=Toxoplasma gondii (strain ATCC 50861 / VEG) GN=BN1205_049880 PE=3 SV=1	B9Q0N7_TOXGV	37 kDa	0.15131	10911000	8009200	6700500	69997000	48343000	50986000
ATP synthase F1 gamma subunit OS=Toxoplasma gondii (strain ATCC 50861 / VEG) GN=BN1205_023860 PE=3 SV=1	B9PGP4_TOXGV	35 kDa	0.229507	7533400	4961700	5978600	46377000	16221000	17895000
DJ-1 family protein OS=Toxoplasma gondii (strain ATCC 50861 / VEG) GN=BN1205_031580 PE=1 SV=1	B9PZH8_TOXGV	28 kDa	0.196477	21568000	20432000	18571000	153030000	73445000	81811000
Heat shock protein 90 OS=Toxoplasma gondii (strain ATCC 50861 / VEG) GN=BN1205_082150 PE=3 SV=1	A0A0F7V6Y1_TOXGV	82 kDa	0.16004	2302300	4656400	3455600	29295000	13813000	21965000
Protein disulfide-isomerase OS=Toxoplasma gondii (strain ATCC 50861 / VEG) GN=BN1205_009420 PE=3 SV=1	A0A0F7UU04_TOXGV	53 kDa	0.220644	5757700	5789900	2550200	17602000	21282000	25010000
Rhoptry neck protein RON5 OS=Toxoplasma gondii (strain ATCC 50861 / VEG) GN=TGVEG_311470 PE=4 SV=1	A0A125YSX9_TOXGV	187 kDa	0.205913	1330300	2172100	3302600	13960000	8772000	10316000
CMGC kinase, CK2 family OS=Toxoplasma gondii (strain ATCC 50861 / VEG) GN=BN1205_049920 PE=4 SV=1	B9QP11_TOXGV	60 kDa	0.196754	10325000	5676700	3845500	50985000	26669000	23219000
Phosphoglycerate kinase OS=Toxoplasma gondii (strain ATCC 50861 / VEG) GN=BN1205_009660 PE=3 SV=1	B9QI15_TOXGV	45 kDa	0.157027	5055400	6042800	3460900	44201000	22977000	25539000
Uncharacterized protein OS=Toxoplasma gondii (strain ATCC 50861 / VEG) GN=BN1205_074190 PE=4 SV=1	B9PKR3_TOXGV	18 kDa	0.18338	3740800	3720100	3856200	31486000	14647000	15581000
Eukaryotic translation initiation factor 3 subunit M OS=Toxoplasma gondii (strain ATCC 50861 / VEG) GN=BN1205_006590 PE=3 SV=1	B9PQ71_TOXGV	52 kDa	0.246572	8248900	10136000	9088200	52729000	29228000	29463000
Putative vacuolar ATP synthase subunit b OS=Toxoplasma gondii (strain ATCC 50861 / VEG) GN=BN1205_070070 PE=3 SV=1	B9PQR4_TOXGV	57 kDa	0.226967	2676100	3320600	4066000	23551000	9638600	11146000
DnaJ protein, putative OS=Toxoplasma gondii (strain ATCC 50861 / VEG) GN=BN1205_076080 PE=4 SV=1	B6KB69_TOXGV	45 kDa	0.242551	8023300	7469700	7039000	47759000	22297000	22840000
Rhoptry neck protein RON4 OS=Toxoplasma gondii (strain ATCC 50861 / VEG) GN=BN1205_026480 PE=4 SV=1	A0A0F7V090_TOXGV	107 kDa	0.206598	2674800	3709800	2238800	19734000	10007000	11999000
Putative asparagine synthetase OS=Toxoplasma gondii (strain ATCC 50861 / VEG) GN=TGVEG_253430 PE=4 SV=1	B9PWN3_TOXGV	66 kDa	0.218247	4446100	1694000	2790300	20198000	7828800	12892000
GTP-binding nuclear protein OS=Toxoplasma gondii (strain ATCC 50861 / VEG) GN=TGVEG_248340 PE=3 SV=1	A0A125YV47_TOXGV	26 kDa	0.154739	8636700	7254900	6369100	64625000	33167000	46068000
2-oxoglutarate/malate translocase OMT OS=Toxoplasma gondii (strain ATCC 50861 / VEG) GN=BN1205_021420 PE=3 SV=1	B6KDT4_TOXGV	35 kDa	0.200207	1968000	3404200	3887200	18861000	7375100	20013000
Tubulin alpha chain OS=Toxoplasma gondii (strain ATCC 50861 / VEG) GN=BN1205_101500 PE=3 SV=1	B9PJD4_TOXGV	50 kDa	0.242006	2978900	4981900	2571700	24812000	10518000	8191600
Beige/BEACH domain-containing protein OS=Toxoplasma gondii (strain ATCC 50861 / VEG) GN=BN1205_071710 PE=4 SV=1	V4YUS8_TOXGV	207 kDa	0.221231	2518800	3070700	4032800	19597000	9073300	14824000
ATPase, AAA family domain-containing protein OS=Toxoplasma gondii (strain ATCC 50861 / VEG) GN=BN1205_062690 PE=4 SV=1	B6KM09_TOXGV	67 kDa	0.169251	3905900	2594700	2829000	25882000	11796000	17445000
Peptide methionine sulfoxide reductase OS=Toxoplasma gondii (strain ATCC 50861 / VEG) GN=BN1205_066540 PE=3 SV=1	B9PMF9_TOXGV	30 kDa	0.184153	5986000	7935000	6357200	55510000	19633000	34973000
6-pyruvoyl tetrahydrobiopterin synthase OS=Toxoplasma gondii (strain ATCC 50861 / VEG) GN=BN1205_107220 PE=4 SV=1	B9PZD4_TOXGV	49 kDa	0.192218	4022800	4311800	1600800	28386000	8946300	14356000
Endonuclease IV APN OS=Toxoplasma gondii (strain ATCC 50861 / VEG) GN=BN1205_082440 PE=3 SV=1	B9QDU2_TOXGV	72 kDa	0.234487	1738900	3351800	2913700	15682000	8019800	10434000
Eukaryotic translation initiation factor 3 subunit G OS=Toxoplasma gondii (strain ATCC 50861 / VEG) GN=BN1205_013280 PE=3 SV=1	A0A0F7UU07_TOXGV	32 kDa	0.234906	5881100	3862500	4562400	30136000	12166000	18599000
Peptidase M16 inactive domain-containing protein OS=Toxoplasma gondii (strain ATCC 50861 / VEG) GN=TGVEG_227948 PE=4 SV=1	V4ZKE2_TOXGV	143 kDa	0.157203	1316900	1376100	2000400	15174000	5817200	8864500
Uncharacterized protein OS=Toxoplasma gondii (strain ATCC 50861 / VEG) GN=BN1205_053560 PE=4 SV=1	B9PYY9_TOXGV	27 kDa	0.166797	4727300	6737400	5902000	55036000	19927000	29156000
Eukaryotic translation initiation factor 3 subunit C OS=Toxoplasma gondii (strain ATCC 50861 / VEG) GN=TGVEG_294620 PE=3 SV=1	A0A125YXF0_TOXGV	109 kDa	0.189001	3561900	1705900	1482300	15972000	8541700	11201000
Uncharacterized protein OS=Toxoplasma gondii (strain ATCC 50861 / VEG) GN=BN1205_030190 PE=4 SV=1	B9QN06_TOXGV	13 kDa	0.237794	1668900	2617700	3569100	19595000	7110400	6330300
Eukaryotic translation initiation factor 3 subunit I OS=Toxoplasma gondii (strain ATCC 50861 / VEG) GN=BN1205_083580 PE=3 SV=1	B9PTM0_TOXGV	38 kDa	0.165947	3819900	2360200	1377900	29242000	9176000	7126600
Putative transport protein Sec24 OS=Toxoplasma gondii (strain ATCC 50861 / VEG) GN=BN1205_027670 PE=4 SV=1	B9PS36_TOXGV	108 kDa	0.150967	1862600	1966400	2138400	20033000	8728900	10766000
Pyridine nucleotide-disulfide oxidoreductase domain-containing protein OS=Toxoplasma gondii (strain ATCC 50861 / VEG) GN=BN1205_040660 PE=4 SV=1	B6KNZ3_TOXGV	71 kDa	0.19653	1820300	2859300	1784800	17304000	6099300	9489400
Prohibitin, putative OS=Toxoplasma gondii (strain ATCC 50861 / VEG) GN=BN1205_103680 PE=4 SV=1	B9PP22_TOXGV	30 kDa	0.1678	1977900	2337800	2721700	21455000	8842100	11642000
60s ribosomal protein L13a, putative OS=Toxoplasma gondii (strain ATCC 50861 / VEG) GN=BN1205_085260 PE=3 SV=1	B9PT75_TOXGV	33 kDa	0.190799	4136700	2856400	3271500	25820000	10071000	17907000
Heat shock protein OS=Toxoplasma gondii (strain ATCC 50861 / VEG) GN=BN1205_022700 PE=3 SV=1	A0A125YY58_TOXGV	20 kDa	0.241624	5846000	1522800	2950000	18991000	12186000	11529000
Putative transmembrane protein OS=Toxoplasma gondii (strain ATCC 50861 / VEG) GN=TGVEG_215980 PE=4 SV=1	B9Q0L6_TOXGV	24 kDa	0.208852	1998800	1371800	1102200	9601600	5652200	6162300
Acetyil CoA acetyltransferase/thiolase,putative OS=Toxoplasma gondii (strain ATCC 50861 / VEG) GN=BN1205_042320 PE=3 SV=1	B9Q2W7_TOXGV	44 kDa	0.156607	816200	762370	1143900	9485000	3919300	3979800
Putative alanine racemase OS=Toxoplasma gondii (strain ATCC 50861 / VEG) GN=BN1205_022210 PE=4 SV=1	A0A0F7UXR1_TOXGV	96 kDa	0.186032	2239600	913430	0	6503100	5079800	5366000
NTPase (Fragment) OS=Toxoplasma gondii (strain ATCC 50861 / VEG) GN=TGVEG_440110 PE=3 SV=1	V4Z362_TOXGV	41 kDa	0.168817	40799000	39103000	47312000	327110000	195640000	230810000
Sec 13, putative OS=Toxoplasma gondii (strain ATCC 50861 / VEG) GN=BN1205_047720 PE=4 SV=1	B9PUT7_TOXGV	67 kDa	0.226997	11880000	10013000	9187900	70184000	30165000	36573000
EF-1 guanine nucleotide exchange domain-containing protein OS=Toxoplasma gondii (strain ATCC 50861 / VEG) GN=TGVEG_226410 PE=4 SV=1	V4YX16_TOXGV	38 kDa	0.22718	3670000	2479400	3406600	21328000	9865500	10870000
Eukaryotic translation initiation factor 3 subunit B OS=Toxoplasma gondii (strain ATCC 50861 / VEG) GN=BN1205_053270 PE=3 SV=1	B9PYW7_TOXGV	88 kDa	0.198967	2635700	2074600	2961600	20977000	6440600	11141000
Membrane protein, putative OS=Toxoplasma gondii (strain ATCC 50861 / VEG) GN=BN1205_066710 PE=4 SV=1	B9PMH7_TOXGV	15 kDa	0.178633	3770200	7113800	3859500	48310000	14663000	19562000
Eukaryotic translation initiation factor 4E,putative OS=Toxoplasma gondii (strain ATCC 50861 / VEG) GN=BN1205_063880 PE=3 SV=1	B9Q6Y6_TOXGV	26 kDa	0.153818	1760800	1849800	1148000	10746000	7765600	12425000
Putative U1 snRNP-associated protein Usp106 OS=Toxoplasma gondii (strain ATCC 50861 / VEG) GN=BN1205_071760 PE=4 SV=1	B9PLM3_TOXGV	45 kDa	0.233473	3003000	2846700	2424300	15050000	10496000	9892800
Elongation factor Tu OS=Toxoplasma gondii (strain ATCC 50861 / VEG) GN=BN1205_072470 PE=3 SV=1	B9PLT1_TOXGV	60 kDa	0.184304	2170700	2138200	1792600	18194000	6655500	8256200
Polyadenylate-binding protein OS=Toxoplasma gondii (strain ATCC 50861 / VEG) GN=BN1205_065695 PE=3 SV=1	A0A125YFB9_TOXGV	83 kDa	0.19762	1388500	1313900	1185700	10812000	3787600	5075000
Rhoptry kinase family protein ROP40 (Incomplete catalytic triad) OS=Toxoplasma gondii (strain ATCC 50861 / VEG) GN=TGVEG_291960 PE=4 SV=1	A0A125YGR1_TOXGV	58 kDa	0.221978	1915900	1539700	787400	10953000	3619500	4542000
Glyceraldehyde-3-phosphate dehydrogenase OS=Toxoplasma gondii (strain ATCC 50861 / VEG) GN=BN1205_016300 PE=3 SV=1	V5BMS8_TOXGV	105 kDa	0.202502	1502400	1755100	1054000	6751600	6470400	8069100
1-acyl-sn-glycerol-3-phosphate acyltransferase,putative OS=Toxoplasma gondii (strain ATCC 50861 / VEG) GN=BN1205_090430 PE=4 SV=1	B9PPK8_TOXGV	32 kDa	0.203177	1227000	1448300	1623200	9864400	5515300	5776700
Protein disulfide-isomerase domain-containing protein (Fragment) OS=Toxoplasma gondii (strain ATCC 50861 / VEG) GN=TGVEG_238040B PE=4 SV=1	V4Z7B3_TOXGV	27 kDa	0.179091	59905000	55996000	46001000	482410000	220900000	200710000
Glutamate-tRNA ligase OS=Toxoplasma gondii (strain ATCC 50861 / VEG) GN=TGVEG_263870 PE=3 SV=1	V4YUG0_TOXGV	93 kDa	0.247986	446050	1099500	794590	3487900	2742300	3206400
14 kDa phosphohistidine phosphatase, putative OS=Toxoplasma gondii (strain ATCC 50861 / VEG) GN=BN1205_053370 PE=4 SV=1	V4ZC85_TOXGV	42 kDa	0.207902	655930	1884300	472090	4707000	4624500	5157600
Ubiquitin-conjugating enzyme subfamily protein OS=Toxoplasma gondii (strain ATCC 50861 / VEG) GN=TGVEG_235450 PE=3 SV=1	A0A125YIF0_TOXGV	26 kDa	0.153629	0	1414600	1068400	7738300	4042800	4381200
Pyrroline-5-carboxylate reductase OS=Toxoplasma gondii (strain ATCC 50861 / VEG) GN=TGVEG_271610 PE=3 SV=1	B9Q6B5_TOXGV	41 kDa	0.221301	3622700	2435900	3557600	19041000	11181000	13231000
CELF family protein, putative OS=Toxoplasma gondii (strain ATCC 50861 / VEG) GN=BN1205_059020 PE=4 SV=1	A0A0F7UNU4_TOXGV	51 kDa	0.237847	0	3554300	3001800	15859000	4538600	7166800
Elongation factor 1-gamma, putative OS=Toxoplasma gondii (strain ATCC 50861 / VEG) GN=BN1205_007630 PE=3 SV=1	B9Q2T3_TOXGV	44 kDa	0.21715	5572700	2482200	0	14292000	9454700	13347000
Putative quinone oxidoreductase OS=Toxoplasma gondii (strain ATCC 50861 / VEG) GN=TGVEG_244870 PE=4 SV=1	V5B7Y3_TOXGV	43 kDa	0.18085	0	907410	884490	3592300	1894300	4421600
Mitotic checkpoint protein BUB3, putative OS=Toxoplasma gondii (strain ATCC 50861 / VEG) GN=BN1205_006410 PE=4 SV=1	B9PQ50_TOXGV	37 kDa	0.162178	0	551760	1087500	3358800	3271100	3477900
Transaldolase (Fragment) OS=Toxoplasma gondii (strain ATCC 50861 / VEG) GN=TGVEG_439880 PE=4 SV=1	V4ZPP0_TOXGV	43 kDa	0.152322	955940	1533200	1450500	11697000	6733100	7433800
DEAD (Asp-Glu-Ala-Asp) box polypeptide 17 OS=Toxoplasma gondii (strain ATCC 50861 / VEG) GN=BN1205_060670 PE=3 SV=1	B9PVZ6_TOXGV	60 kDa	0.228671	1743500	0	0	4270300	1685500	1668700
Pyruvate dehydrogenase E1 beta subunit,putative OS=Toxoplasma gondii (strain ATCC 50861 / VEG) GN=BN1205_019750 PE=4 SV=1	B9Q6G0_TOXGV	50 kDa	0.152443	0	1191900	676390	4552900	1975900	5726900
Eukaryotic porin protein OS=Toxoplasma gondii (strain ATCC 50861 / VEG) GN=BN1205_049600 PE=4 SV=1	B9Q0Q9_TOXGV	31 kDa	0.174076	445590	2069100	1149700	9304900	4729100	7016500
40S ribosomal protein S11, putative OS=Toxoplasma gondii (strain ATCC 50861 / VEG) GN=BN1205_067990 PE=3 SV=1	B9PMU7_TOXGV	19 kDa	0.239131	2283800	1833700	1539700	13398000	3744800	6514500
40s ribosomal protein S20, putative OS=Toxoplasma gondii (strain ATCC 50861 / VEG) GN=BN1205_053570 PE=3 SV=1	B6KQG9_TOXGV	26 kDa	0.204206	5114600	0	4215200	21414000	9487200	14787000
SUMO-conjugating enzyme OS=Toxoplasma gondii (strain ATCC 50861 / VEG) GN=BN1205_039590 PE=3 SV=1	B9PXN8_TOXGV	24 kDa	0.229191	2534900	1497300	0	6906400	4193400	6493400
Serine hydroxymethyltransferase OS=Toxoplasma gondii (strain ATCC 50861 / VEG) GN=BN1205_063010 PE=3 SV=1	B9Q6U0_TOXGV	65 kDa	0.166783	1179200	0	642740	4378600	2103600	4441800
Putative peroxiredoxin 6 OS=Toxoplasma gondii (strain ATCC 50861 / VEG) GN=TGVEG_309210 PE=4 SV=1	A0A125YWN4_TOXGV	44 kDa	0.154197	0	1035600	857950	4087900	4229400	3962800
Putative transmembrane protein OS=Toxoplasma gondii (strain ATCC 50861 / VEG) GN=TGVEG_313070 PE=4 SV=1	A0A125YH91_TOXGV	36 kDa	0.245708	0	0	694730	1194100	999560	633800
MORN repeat-containing protein OS=Toxoplasma gondii (strain ATCC 50861 / VEG) GN=BN1205_097320 PE=4 SV=1	B6K916_TOXGV	46 kDa	0.249718	0	1086500	0	2335900	0	2015000
3-ketoacyl-CoA reductase, putative OS=Toxoplasma gondii (strain ATCC 50861 / VEG) GN=BN1205_019350 PE=3 SV=1	V4ZM35_TOXGV	37 kDa	0.185006	760970	0	0	1911700	1357800	843720
Sjogren's syndrome/scleroderma autoantigen 1 (Autoantigen p27) protein OS=Toxoplasma gondii (strain ATCC 50861 / VEG) GN=BN1205_063570 PE=4 SV=1	B9Q6X5_TOXGV	38 kDa	0.241211	1823300	852410	0	7999700	0	3093100
Eukaryotic initiation factor-2, alpha subunit OS=Toxoplasma gondii (strain ATCC 50861 / VEG) GN=BN1205_097260 PE=4 SV=1	B9PII8_TOXGV	39 kDa	0.205136	521290	213260	0	0	1605000	1975800
UBA/TS-N domain-containing protein OS=Toxoplasma gondii (strain ATCC 50861 / VEG) GN=TGVEG_232180 PE=4 SV=1	V4ZUU4_TOXGV	207 kDa	0.176782	0	465330	228450	2399300	0	1525200
28 kDa antigen OS=Toxoplasma gondii (strain ATCC 50861 / VEG) GN=BN1205_068530 PE=4 SV=1	B9Q8A2_TOXGV	20 kDa	0.159859	618670	0	0	0	3870100	0
Wee kinase OS=Toxoplasma gondii (strain ATCC 50861 / VEG) GN=BN1205_045110 PE=4 SV=1	V4ZD37_TOXGV	349 kDa	0.248775	0	4335900	0	0	0	17429000
Putative WD-40 repeat protein OS=Toxoplasma gondii (strain ATCC 50861 / VEG) GN=BN1205_097410 PE=4 SV=1	B6K922_TOXGV	47 kDa	0.17352	306210	0	0	1285600	0	479100
Nucleoside-triphosphatase OS=Toxoplasma gondii (strain ATCC 50861 / VEG) GN=TGVEG_360830 PE=3 SV=1	V5AWC8_TOXGV	41 kDa	0.143102	91749000	50678000	67150000	616320000	374430000	473780000
DEAD/DEAH box helicase domain-containing protein OS=Toxoplasma gondii (strain ATCC 50861 / VEG) GN=TGVEG_294350 PE=4 SV=1	B9PYA4_TOXGV	274 kDa	0.126903	6987700	12627000	9197000	114690000	51913000	60435000
Leucyl aminopeptidase LAP OS=Toxoplasma gondii (strain ATCC 50861 / VEG) GN=TGVEG_290670 PE=3 SV=1	A0A125YKM7_TOXGV	83 kDa	0.130094	8075000	10188000	9200700	88641000	52548000	69918000
Peptidylprolyl isomerase OS=Toxoplasma gondii (strain ATCC 50861 / VEG) GN=TGVEG_283850 PE=4 SV=1	B9QGQ8_TOXGV	56 kDa	0.121673	6290600	6082400	6467500	70803000	39646000	44397000
Adenylyl cyclase associated protein OS=Toxoplasma gondii (strain ATCC 50861 / VEG) GN=BN1205_094110 PE=4 SV=1	B9PJM1_TOXGV	22 kDa	0.122427	26246000	31454000	28540000	381780000	140660000	181980000
Methionyl-tRNA synthetase OS=Toxoplasma gondii (strain ATCC 50861 / VEG) GN=BN1205_083160 PE=3 SV=1	B9QDZ9_TOXGV	106 kDa	0.143576	10392000	5285200	5093000	70189000	37033000	37441000
SAG-related sequence SRS34A OS=Toxoplasma gondii (strain ATCC 50861 / VEG) GN=BN1205_018330 PE=4 SV=1	A0A0F7V1Z5_TOXGV	19 kDa	0.110192	18741000	14111000	27684000	266550000	163660000	119160000
Eukaryotic translation initiation factor 3 subunit E OS=Toxoplasma gondii (strain ATCC 50861 / VEG) GN=BN1205_020770 PE=3 SV=1	B6KDN0_TOXGV	67 kDa	0.146251	3142700	7868600	2944000	48775000	25108000	21537000
Eukaryotic translation initiation factor 3 subunit H OS=Toxoplasma gondii (strain ATCC 50861 / VEG) GN=TGVEG_251500 PE=3 SV=1	B6KHR8_TOXGV	66 kDa	0.113768	6651100	6485400	5593000	73516000	43266000	47847000
Lactate dehydrogenase OS=Toxoplasma gondii (strain ATCC 50861 / VEG) GN=BN1205_023290 PE=3 SV=1	A0A0F7UY31_TOXGV	36 kDa	0.138623	9869500	5462300	8461100	68533000	44136000	58969000
Protein transport protein Sec23, putative OS=Toxoplasma gondii (strain ATCC 50861 / VEG) GN=BN1205_084810 PE=4 SV=1	B6KKZ7_TOXGV	88 kDa	0.148476	3784900	2819200	2738600	21895000	17236000	23793000
WD domain, G-beta repeat-containing protein OS=Toxoplasma gondii (strain ATCC 50861 / VEG) GN=BN1205_010775 PE=4 SV=1	V4Z2X0_TOXGV	60 kDa	0.121414	2519500	2306500	2535200	22329000	19509000	18791000
WD domain, G-beta repeat-containing protein OS=Toxoplasma gondii (strain ATCC 50861 / VEG) GN=BN1205_095510 PE=4 SV=1	A0A125YVF2_TOXGV	166 kDa	0.0956864	2507300	1488300	854650	26569000	9167000	14953000
Myosin light chain 2, putative OS=Toxoplasma gondii (strain ATCC 50861 / VEG) GN=BN1205_054400 PE=4 SV=1	V5B269_TOXGV	41 kDa	0.119913	1419600	2732700	3153400	28684000	14800000	17441000
Alpha-1 type II collagen, putative OS=Toxoplasma gondii (strain ATCC 50861 / VEG) GN=BN1205_081090 PE=4 SV=1	B9QER9_TOXGV	160 kDa	0.123164	669340	845970	1517500	10987000	5974800	7662300
Histone H2A OS=Toxoplasma gondii (strain ATCC 50861 / VEG) GN=TGVEG_261250 PE=3 SV=1	A0A125YX76_TOXGV	20 kDa	0.139384	14675000	21591000	10314000	144550000	142320000	47315000
3-oxoacyl-[acyl-carrier-protein] synthase,putative OS=Toxoplasma gondii (strain ATCC 50861 / VEG) GN=BN1205_014190 PE=3 SV=1	A0A0F7UNF6_TOXGV	58 kDa	0.142888	6695300	7524300	2141400	51494000	27106000	35902000
Glycerate kinase OS=Toxoplasma gondii (strain ATCC 50861 / VEG) GN=BN1205_103860 PE=4 SV=1	V4ZCI9_TOXGV	39 kDa	0.10953	3088200	1833400	4196700	40450000	18925000	23874000
Casein kinase II subunit beta OS=Toxoplasma gondii (strain ATCC 50861 / VEG) GN=BN1205_019920 PE=3 SV=1	B9PID4_TOXGV	40 kDa	0.145698	4149400	3250700	2087300	30620000	19038000	15459000
Uncharacterized protein OS=Toxoplasma gondii (strain ATCC 50861 / VEG) GN=TGVEG_215220 PE=4 SV=1	V4YSG2_TOXGV	63 kDa	0.0989334	0	2676600	2456500	9217400	18053000	24614000
Eukaryotic translation initiation factor 2 gamm a subunit, putative OS=Toxoplasma gondii (strain ATCC 50861 / VEG) GN=BN1205_061320 PE=4 SV=1	B9PW44_TOXGV	51 kDa	0.11085	1447100	3281800	2677400	37326000	13602000	15886000
Lanthionine synthetase C family protein OS=Toxoplasma gondii (strain ATCC 50861 / VEG) GN=BN1205_034575 PE=4 SV=1	V4YR89_TOXGV	46 kDa	0.124545	2272300	1555300	1707700	25719000	7028300	11697000
Threonyl-tRNA synthetase family protein OS=Toxoplasma gondii (strain ATCC 50861 / VEG) GN=BN1205_007520 PE=3 SV=1	B9Q2S1_TOXGV	96 kDa	0.100122	955620	453280	380260	7597600	3749300	6522900
Rhoptry neck protein RON3 OS=Toxoplasma gondii (strain ATCC 50861 / VEG) GN=BN1205_064400 PE=4 SV=1	V4YW47_TOXGV	223 kDa	0.0999742	621550	902310	647760	11724000	3739400	6258400
Putative transmembrane protein OS=Toxoplasma gondii (strain ATCC 50861 / VEG) GN=BN1205_051660 PE=4 SV=1	B9QH40_TOXGV	48 kDa	0.126571	1404800	1028900	838940	12626000	7490800	5739400
Calmodulin OS=Toxoplasma gondii (strain ATCC 50861 / VEG) GN=BN1205_002630 PE=4 SV=1	B9PR42_TOXGV	17 kDa	0.0951839	4959900	0	5275700	53994000	24177000	29364000
Clathrin heavy chain OS=Toxoplasma gondii (strain ATCC 50861 / VEG) GN=BN1205_084360 PE=3 SV=1	B9PTE8_TOXGV	194 kDa	0.127326	1353600	758930	931350	6397100	9120700	8388300
Microneme protein MIC6 OS=Toxoplasma gondii (strain ATCC 50861 / VEG) GN=BN1205_071220 PE=4 SV=1	B9QLZ0_TOXGV	37 kDa	0.123109	0	5917000	1197300	46669000	5529800	5589700
Slc30a2 protein OS=Toxoplasma gondii (strain ATCC 50861 / VEG) GN=TGVEG_251630 PE=4 SV=1	A0A125YV16_TOXGV	100 kDa	0.119254	1160000	730550	0	8599800	2765000	4488400
M16 family peptidase, putative OS=Toxoplasma gondii (strain ATCC 50861 / VEG) GN=BN1205_031390 PE=4 SV=1	B9QNA3_TOXGV	149 kDa	0.102568	883860	0	0	4165400	2009300	2442600
4'-phosphopantetheinyl transferase superfamily protein OS=Toxoplasma gondii (strain ATCC 50861 / VEG) GN=BN1205_031430 PE=4 SV=1	B9PZJ0_TOXGV	48 kDa	0.0955127	1175200	620400	0	8993600	3818500	5987500
Phosphate carrier protein, putative OS=Toxoplasma gondii (strain ATCC 50861 / VEG) GN=BN1205_029620 PE=3 SV=1	B9PRN1_TOXGV	53 kDa	0.14747	627040	977260	1108900	8792500	2901600	6704200
Calcium-dependent protein kinase CDPK1 OS=Toxoplasma gondii (strain ATCC 50861 / VEG) GN=TGVEG_301440 PE=4 SV=1	A0A125YH31_TOXGV	65 kDa	0.0992363	924740	587780	0	4671300	3676200	6894100
Histone deacetylase OS=Toxoplasma gondii (strain ATCC 50861 / VEG) GN=BN1205_047220 PE=4 SV=1	B9QFY8_TOXGV	154 kDa	0.107544	0	724220	584290	8262200	1472100	2432900
Proteasome endopeptidase complex OS=Toxoplasma gondii (strain ATCC 50861 / VEG) GN=BN1205_034070 PE=3 SV=1	B9PSG2_TOXGV	26 kDa	0.129723	1540300	0	0	1424300	3869100	6580400
Ribosomal protein RPL28 (Fragment) OS=Toxoplasma gondii (strain ATCC 50861 / VEG) GN=TGVEG_229250A PE=4 SV=1	A0A125YHB5_TOXGV	8 kDa	0.144462	945950	0	0	4486200	0	2061900
Importin subunit alpha OS=Toxoplasma gondii (strain ATCC 50861 / VEG) GN=BN1205_056000 PE=3 SV=1	A0A0F7UQ95_TOXGV	59 kDa	0.117018	807270	172740	0	3080400	1999000	3295500
Branched-chain alpha-keto acid dehydrogenase E1 component beta chain, putative OS=Toxoplasma gondii (strain ATCC 50861 / VEG) GN=BN1205_099490 PE=4 SV=1	B9PIV3_TOXGV	46 kDa	0.105228	463930	0	500970	2628500	2558000	3983100
Ribosomal protein RPS28 OS=Toxoplasma gondii (strain ATCC 50861 / VEG) GN=TGVEG_209290 PE=3 SV=1	A0A125YJ29_TOXGV	13 kDa	0.142407	469980	0	0	2421200	0	879060
SAG-related sequence SRS30A OS=Toxoplasma gondii (strain ATCC 50861 / VEG) GN=TGVEG_273130 PE=4 SV=1	V4ZLN9_TOXGV	43 kDa	0.117377	0	773770	0	3365300	1168300	2058600
Brf1p family coiled coil protein OS=Toxoplasma gondii (strain ATCC 50861 / VEG) GN=BN1205_023200 PE=4 SV=1	B9PGI8_TOXGV	54 kDa	0.115216	516260	0	252780	4007500	898460	1768800
Putative suppressor of kinetochore protein 1 OS=Toxoplasma gondii (strain ATCC 50861 / VEG) GN=BN1205_040610 PE=3 SV=1	A0A0F7UNE6_TOXGV	19 kDa	0.133401	781140	0	0	3131600	1208200	1515800
Nmda receptor glutamate-binding chain OS=Toxoplasma gondii (strain ATCC 50861 / VEG) GN=BN1205_093700 PE=3 SV=1	B6KA35_TOXGV	29 kDa	0.108447	0	0	519460	0	2978200	1811800
Small nuclear ribonucleoprotein OS=Toxoplasma gondii (strain ATCC 50861 / VEG) GN=TGVEG_270830 PE=4 SV=1	A0A125YKW2_TOXGV	18 kDa	0.1347	0	770550	0	1362200	2691000	1667300
Proteasome 26S regulatory subunit (Fragment) OS=Toxoplasma gondii (strain ATCC 50861 / VEG) GN=TGVEG_313410A PE=4 SV=1	V4Z4C9_TOXGV	62 kDa	0.132756	0	419430	0	0	1020300	2139100
Phosphodiesterase OS=Toxoplasma gondii (strain ATCC 50861 / VEG) GN=BN1205_014900 PE=3 SV=1	A0A125YIV1_TOXGV	244 kDa	0.096941	921130	0	0	5752400	666170	3083400
Dense granule protein 7 OS=Toxoplasma gondii (strain ATCC 50861 / VEG) GN=BN1205_046120 PE=4 SV=1	A0A0F7UZ13_TOXGV	26 kDa	0.0920439	8688100	22937000	40121000	492650000	71957000	214870000
PEP-carboxykinase I OS=Toxoplasma gondii (strain ATCC 50861 / VEG) GN=TGVEG_289650 PE=3 SV=1	V4Z074_TOXGV	75 kDa	0.0894328	826340	1348500	1820300	23425000	10522000	10725000
Putative vacuolar protein sorting-associated protein 26 OS=Toxoplasma gondii (strain ATCC 50861 / VEG) GN=TGVEG_263500 PE=4 SV=1	V4Z8Z4_TOXGV	42 kDa	0.0913974	1672800	1897000	0	16638000	11535000	10885000
Nucleoporin complex subunit 54 OS=Toxoplasma gondii (strain ATCC 50861 / VEG) GN=BN1205_003290 PE=4 SV=1	B6KH74_TOXGV	38 kDa	0.0874598	2084000	0	834900	11488000	8279200	13607000
Uncharacterized protein (Fragment) OS=Toxoplasma gondii (strain ATCC 50861 / VEG) GN=TGVEG_442370 PE=4 SV=1	V4Z2D9_TOXGV	34 kDa	0.0878853	397090	1202300	1367300	15755000	5792400	12209000
Putative transmembrane protein OS=Toxoplasma gondii (strain ATCC 50861 / VEG) GN=TGVEG_258870 PE=4 SV=1	A0A125YFF8_TOXGV	102 kDa	0.0907067	637950	0	445260	4186700	3789300	3965900
Coatomer alpha subunit, putative OS=Toxoplasma gondii (strain ATCC 50861 / VEG) GN=BN1205_090650 PE=4 SV=1	B9QK32_TOXGV	143 kDa	0.0855779	288780	793960	0	5023700	3852200	3776200
Casein kinase II subunit beta OS=Toxoplasma gondii (strain ATCC 50861 / VEG) GN=BN1205_015820 PE=3 SV=1	B9Q595_TOXGV	34 kDa	0.0897647	0	969970	0	5050500	1624100	4131100
Putative eIF4-gamma/eIF5/eIF2b-epsilon carboxy-terminal domain protein OS=Toxoplasma gondii (strain ATCC 50861 / VEG) GN=BN1205_100380 PE=4 SV=1	B9PJ24_TOXGV	85 kDa	0.0891647	0	763000	0	4398000	2049600	2109600
WD domain, G-beta repeat-containing protein OS=Toxoplasma gondii (strain ATCC 50861 / VEG) GN=BN1205_014080 PE=4 SV=1	B9PY61_TOXGV	53 kDa	0.0912621	598360	0	0	3006100	1575500	1974900
Actin OS=Toxoplasma gondii (strain ATCC 50861 / VEG) GN=BN1205_039430 PE=3 SV=1	A0A0F7UTC9_TOXGV	42 kDa	0.0797038	76356000	58224000	58787000	1212300000	549660000	664110000
Glutamine-dependent NAD( ) synthetase protein,putative OS=Toxoplasma gondii (strain ATCC 50861 / VEG) GN=BN1205_017020 PE=4 SV=1	B9Q5R8_TOXGV	94 kDa	0.0824264	6587700	6068000	3070100	116680000	29876000	44230000
Lysophospholipase, putative OS=Toxoplasma gondii (strain ATCC 50861 / VEG) GN=BN1205_033790 PE=4 SV=1	B9QG70_TOXGV	107 kDa	0.0758043	4162700	5132900	5983600	61965000	42926000	96670000
Uncharacterized protein OS=Toxoplasma gondii (strain ATCC 50861 / VEG) GN=BN1205_070140 PE=4 SV=1	A0A125YG06_TOXGV	200 kDa	0.084228	1124200	1225400	1137800	18170000	9166300	14068000
Cof family hydrolase subfamily protein OS=Toxoplasma gondii (strain ATCC 50861 / VEG) GN=BN1205_103640 PE=4 SV=1	A0A125YMN2_TOXGV	41 kDa	0.0804724	2386600	1382300	1023200	39558000	8377600	11614000
Uncharacterized protein OS=Toxoplasma gondii (strain ATCC 50861 / VEG) GN=TGVEG_249270 PE=3 SV=1	A0A125YVQ8_TOXGV	60 kDa	0.0807937	3920700	1965400	651810	37941000	17358000	25622000
Putative hydrolase family or acyltransferase family,related protein OS=Toxoplasma gondii (strain ATCC 50861 / VEG) GN=BN1205_109460 PE=4 SV=1	B6KVV5_TOXGV	35 kDa	0.0764821	2213200	1467600	637380	25735000	14743000	15982000
Cullin family protein OS=Toxoplasma gondii (strain ATCC 50861 / VEG) GN=BN1205_083170 PE=3 SV=1	B9QE00_TOXGV	104 kDa	0.0763309	714350	605510	0	7005600	4405200	5880500
60S ribosomal protein L38 OS=Toxoplasma gondii (strain ATCC 50861 / VEG) GN=BN1205_024500 PE=3 SV=1	B9PGY7_TOXGV	10 kDa	0.0781733	0	937400	0	5422800	2870000	3698500
Dense granule protein GRA12 OS=Toxoplasma gondii (strain ATCC 50861 / VEG) GN=BN1205_082410 PE=4 SV=1	B9QDT9_TOXGV	48 kDa	0.0787836	0	0	716190	2801300	3695500	2593800
Putative transmembrane protein OS=Toxoplasma gondii (strain ATCC 50861 / VEG) GN=BN1205_071500 PE=4 SV=1	B6KRY9_TOXGV	132 kDa	0.081591	0	380940	0	3222400	0	1446500
Histone H2B OS=Toxoplasma gondii (strain ATCC 50861 / VEG) GN=BN1205_106580 PE=3 SV=1	A0A0F7V600_TOXGV	13 kDa	0.0682584	5143500	13486000	1307400	113220000	154690000	24170000
Uncharacterized protein OS=Toxoplasma gondii (strain ATCC 50861 / VEG) GN=BN1205_062040 PE=4 SV=1	V4YRN2_TOXGV	77 kDa	0.0722358	0	872030	0	7741400	2130400	2200200
NAD(P)H-hydrate epimerase OS=Toxoplasma gondii (strain ATCC 50861 / VEG) GN=TGVEG_249650 PE=3 SV=1	B6KHH5_TOXGV	44 kDa	0.0741874	505980	0	0	3477100	2011400	1331800
Histone deacetylase OS=Toxoplasma gondii (strain ATCC 50861 / VEG) GN=BN1205_068190 PE=3 SV=1	A0A0F7V6N9_TOXGV	50 kDa	0.0662363	340640	0	0	0	1104200	4038600
Ubiquitin carboxyl-terminal hydrolase family 2 protein OS=Toxoplasma gondii (strain ATCC 50861 / VEG) GN=BN1205_083190 PE=3 SV=1	V4ZIR0_TOXGV	248 kDa	0.0558987	1099100	1730100	0	28300000	9663000	12650000
Phosphorylase family protein OS=Toxoplasma gondii (strain ATCC 50861 / VEG) GN=BN1205_094720 PE=4 SV=1	A0A0F7V4E5_TOXGV	33 kDa	0.057555	721830	1624900	650850	23353000	13845000	14884000
5'-nucleotidase, C-terminal domain-containing protein OS=Toxoplasma gondii (strain ATCC 50861 / VEG) GN=BN1205_037480 PE=3 SV=1	B6KST4_TOXGV	78 kDa	0.0551074	1228400	1348500	0	25401000	6832400	14528000
Beta-tubulin cofactor D, putative OS=Toxoplasma gondii (strain ATCC 50861 / VEG) GN=BN1205_054350 PE=4 SV=1	V4YNV3_TOXGV	221 kDa	0.0600067	684010	0	0	6334700	3012200	2052000
Histone H2A OS=Toxoplasma gondii (strain ATCC 50861 / VEG) GN=BN1205_007580 PE=3 SV=1	A0A0F7V6C1_TOXGV	16 kDa	0.0629079	8759300	0	0	0	104450000	34790000
Adenylosuccinate lyase, putative OS=Toxoplasma gondii (strain ATCC 50861 / VEG) GN=BN1205_028510 PE=4 SV=1	B6KRK8_TOXGV	74 kDa	0.0566922	335890	195010	0	4876300	1887400	2600900
Prolyl-tRNA synthetase (ProRS) OS=Toxoplasma gondii (strain ATCC 50861 / VEG) GN=TGVEG_219850 PE=3 SV=1	A0A125YZ49_TOXGV	93 kDa	0.0457278	1178200	1441200	1334500	47632000	21024000	17810000
Myosin F OS=Toxoplasma gondii (strain ATCC 50861 / VEG) GN=BN1205_029490 PE=4 SV=1	B9QML2_TOXGV	216 kDa	0.0481297	730640	1796600	0	21481000	12169000	18859000
Uncharacterized protein OS=Toxoplasma gondii (strain ATCC 50861 / VEG) GN=BN1205_031990 PE=4 SV=1	V4Z952_TOXGV	456 kDa	0.0482406	552920	947190	0	18080000	5326600	7689800
Putative histidyl-tRNA synthetase (HisRS) OS=Toxoplasma gondii (strain ATCC 50861 / VEG) GN=TGVEG_280600 PE=3 SV=1	V4ZDJ3_TOXGV	135 kDa	0.0528533	1947300	0	0	17633000	8943500	10267000
Profilin OS=Toxoplasma gondii (strain ATCC 50861 / VEG) GN=TGVEG_293690 PE=3 SV=1	A0A125YS71_TOXGV	18 kDa	0.0469558	0	1237200	0	8032100	9272900	9043200
Asparaginyl-tRNA synthetase (NOB+tRNA synthase) OS=Toxoplasma gondii (strain ATCC 50861 / VEG) GN=BN1205_017780 PE=3 SV=1	B9Q605_TOXGV	75 kDa	0.0425145	1440700	453320	0	14814000	12349000	17387000
RPAP1 family, C-terminal protein OS=Toxoplasma gondii (strain ATCC 50861 / VEG) GN=BN1205_099620 PE=4 SV=1	A0A125YFA4_TOXGV	331 kDa	0.0387998	0	834280	0	7541900	4626700	9333600
Cell division protein CDC48CY OS=Toxoplasma gondii (strain ATCC 50861 / VEG) GN=TGVEG_273090 PE=3 SV=1	B9PFU8_TOXGV	89 kDa	0.0393203	207720	167390	411300	9615200	4722400	5662500
PH domain protein OS=Toxoplasma gondii (strain ATCC 50861 / VEG) GN=BN1205_013320 PE=4 SV=1	V4YLW8_TOXGV	96 kDa	0.0387732	908630	0	0	13926000	4388800	5119700
SCP family extracellular subfamily protein OS=Toxoplasma gondii (strain ATCC 50861 / VEG) GN=BN1205_091670 PE=3 SV=1	B9PND9_TOXGV	27 kDa	0.0374929	1166000	0	0	14287000	9107200	7705000
Microneme protein MIC13 OS=Toxoplasma gondii (strain ATCC 50861 / VEG) GN=BN1205_074180 PE=4 SV=1	B9QB71_TOXGV	51 kDa	0.0399744	0	418220	0	7432100	1977700	1052400
Histone H2B OS=Toxoplasma gondii (strain ATCC 50861 / VEG) GN=BN1205_038620 PE=3 SV=1	A0A0F7UNS9_TOXGV	14 kDa	0.0387203	0	2696700	0	32889000	32104000	4652700
Apicoplast-associated thioredoxin family protein Atrx1 OS=Toxoplasma gondii (strain ATCC 50861 / VEG) GN=TGVEG_312110 PE=4 SV=1	A0A125YP54_TOXGV	87 kDa	0.0367534	0	0	466860	6017800	2089300	4595400
Signal recognition particle receptor beta subunit protein OS=Toxoplasma gondii (strain ATCC 50861 / VEG) GN=BN1205_081830 PE=4 SV=1	B9QEY3_TOXGV	37 kDa	0.0389355	0	331080	0	3620300	2394000	2489000
NADP-specific glutamate dehydrogenase OS=Toxoplasma gondii (strain ATCC 50861 / VEG) GN=TGVEG_293180 PE=3 SV=1	A0A125YZM5_TOXGV	64 kDa	0.0250016	536250	1113500	855990	42358000	27515000	30350000
Citrate synthase OS=Toxoplasma gondii (strain ATCC 50861 / VEG) GN=TGVEG_263130 PE=3 SV=1	B9QP05_TOXGV	69 kDa	0.0252996	0	541450	1115900	20851000	16153000	28505000
Fructose-bisphosphate aldolase OS=Toxoplasma gondii (strain ATCC 50861 / VEG) GN=BN1205_061250 PE=1 SV=1	B9PW35_TOXGV	47 kDa	0.0311734	0	1712200	0	20060000	18733000	16132000
Putative T complex chaperonin OS=Toxoplasma gondii (strain ATCC 50861 / VEG) GN=BN1205_035610 PE=3 SV=1	A0A125YSE3_TOXGV	59 kDa	0.0279471	483660	247770	0	13039000	6844200	6288700
Histone lysine acetyltransferase GCN5-B OS=Toxoplasma gondii (strain ATCC 50861 / VEG) GN=TGVEG_243440 PE=4 SV=1	B9QJI0_TOXGV	112 kDa	0.0268596	380800	0	0	7654000	2593200	3930200
Carbonate dehydratase, eukaryotic-type domain-containing protein OS=Toxoplasma gondii (strain ATCC 50861 / VEG) GN=BN1205_074410 PE=4 SV=1	B9QB84_TOXGV	94 kDa	0.0326407	0	510220	0	8577200	3121100	3933100
Carbamoyl phosphate synthetase II OS=Toxoplasma gondii (strain ATCC 50861 / VEG) GN=BN1205_030630 PE=3 SV=1	B9QN40_TOXGV	187 kDa	0.0250552	348460	0	0	7416700	2124400	4366600
Adenosylhomocysteinase OS=Toxoplasma gondii (strain ATCC 50861 / VEG) GN=TGVEG_225050 PE=3 SV=1	V4ZBD9_TOXGV	64 kDa	0.0335952	402000	0	0	7514200	2189600	2262200
Glycogen synthase, putative OS=Toxoplasma gondii (strain ATCC 50861 / VEG) GN=BN1205_053240 PE=4 SV=1	V4YNZ5_TOXGV	325 kDa	0.0184469	1577300	0	0	38897000	20296000	26312000
Uncharacterized protein OS=Toxoplasma gondii (strain ATCC 50861 / VEG) GN=BN1205_036570 PE=4 SV=1	V4ZBB4_TOXGV	217 kDa	0.0189639	788550	0	602450	37567000	17193000	18590000
Glucosamine--fructose-6-phosphate aminotransferase (Isomerizing), putative OS=Toxoplasma gondii (strain ATCC 50861 / VEG) GN=BN1205_024220 PE=4 SV=1	A0A0F7V0Q8_TOXGV	97 kDa	0.0163108	0	0	652710	23049000	8850300	8117800
Protease inhibitor PI2 OS=Toxoplasma gondii (strain ATCC 50861 / VEG) GN=BN1205_039940 PE=4 SV=1	A0A0F7UUF1_TOXGV	35 kDa	0.0238219	0	0	659460	14300000	6129500	7253400
tRNA binding domain-containing protein OS=Toxoplasma gondii (strain ATCC 50861 / VEG) GN=TGVEG_223140 PE=4 SV=1	V4Z3K0_TOXGV	51 kDa	0.0198177	0	0	165020	4729000	1869700	1728200
Uncharacterized protein (Fragment) OS=Toxoplasma gondii (strain ATCC 50861 / VEG) GN=TGVEG_227060B PE=4 SV=1	V4ZBL8_TOXGV	112 kDa	0.0140219	548810	0	0	20584000	10697000	7858400
Pyruvate kinase OS=Toxoplasma gondii (strain ATCC 50861 / VEG) GN=BN1205_077720 PE=3 SV=1	A0A0F7UWM4_TOXGV	58 kDa	0.0124795	0	173320	0	3574100	4481800	5832500
Putative seryl-tRNA synthetase, cytoplasmic OS=Toxoplasma gondii (strain ATCC 50861 / VEG) GN=BN1205_000670 PE=4 SV=1	B6KHT7_TOXGV	54 kDa	0.00698733	237380	0	0	8266900	10323000	15383000
Nucleoporin autopeptidase OS=Toxoplasma gondii (strain ATCC 50861 / VEG) GN=BN1205_074610 PE=4 SV=1	B6KBH4_TOXGV	302 kDa	0.00648646	0	420770	0	31536000	14561000	18772000
Heat shock protein 28 OS=Toxoplasma gondii (strain ATCC 50861 / VEG) GN=BN1205_033900 PE=3 SV=1	B9PSE4_TOXGV	31 kDa	0.000978138	1128500	760920	0	911880000	505400000	514370000
Uncharacterized protein OS=Toxoplasma gondii (strain ATCC 50861 / VEG) GN=BN1205_035480 PE=4 SV=1	A0A125YG67_TOXGV	26 kDa	INF	90171000	102880000	134230000	0	0	0
Uncharacterized protein OS=Toxoplasma gondii (strain ATCC 50861 / VEG) GN=BN1205_101355 PE=4 SV=1	A0A125YHY2_TOXGV	10 kDa	INF	295980000	356510000	520940000	0	0	0
Uncharacterized protein OS=Toxoplasma gondii (strain ATCC 50861 / VEG) GN=TGVEG_263630 PE=4 SV=1	A0A125YIA3_TOXGV	15 kDa	INF	235290000	254380000	199160000	0	0	0
Uncharacterized protein OS=Toxoplasma gondii (strain ATCC 50861 / VEG) GN=BN1205_029330 PE=4 SV=1	B9QMJ6_TOXGV	72 kDa	INF	7751500	4858700	8033300	0	0	0
Uncharacterized protein OS=Toxoplasma gondii (strain ATCC 50861 / VEG) GN=BN1205_096260 PE=4 SV=1	B6K8R4_TOXGV	22 kDa	INF	21516000	56885000	55651000	0	0	0
Putative transmembrane protein OS=Toxoplasma gondii (strain ATCC 50861 / VEG) GN=BN1205_097110 PE=4 SV=1	B6K8Z6_TOXGV	50 kDa	INF	3533700	5704900	6248900	0	0	0
Immune mapped protein 1 OS=Toxoplasma gondii (strain ATCC 50861 / VEG) GN=BN1205_014410 PE=4 SV=1	A0A0F7UTR7_TOXGV	43 kDa	INF	1926700	2020900	2416900	0	0	0
Cyclophilin, putative OS=Toxoplasma gondii (strain ATCC 50861 / VEG) GN=BN1205_072320 PE=4 SV=1	B6KC20_TOXGV	35 kDa	INF	3018500	3801000	2803000	0	0	0
IMC sub-compartment protein ISP1 OS=Toxoplasma gondii (strain ATCC 50861 / VEG) GN=BN1205_073560 PE=1 SV=1	B9PKK4_TOXGV	19 kDa	INF	2165800	2794400	3327600	0	0	0
46 kDa FK506-binding nuclear protein, putative OS=Toxoplasma gondii (strain ATCC 50861 / VEG) GN=BN1205_073950 PE=4 SV=1	B6KBN3_TOXGV	34 kDa	INF	2336500	2234200	1403000	0	0	0
Uncharacterized protein OS=Toxoplasma gondii (strain ATCC 50861 / VEG) GN=BN1205_061545 PE=4 SV=1	V4Z6B8_TOXGV	39 kDa	INF	1123200	1527300	1841700	0	0	0
Putative transmembrane protein OS=Toxoplasma gondii (strain ATCC 50861 / VEG) GN=BN1205_007910 PE=4 SV=1	B9Q2W0_TOXGV	59 kDa	INF	1313900	758350	4193200	0	0	0
Cgd4-790 OS=Toxoplasma gondii (strain ATCC 50861 / VEG) GN=BN1205_032555 PE=4 SV=1	A0A125YFC3_TOXGV	9 kDa	INF	3674700	0	0	0	0	0
Golgi to ER traffic protein 4 homolog OS=Toxoplasma gondii (strain ATCC 50861 / VEG) GN=BN1205_070760 PE=4 SV=1	B9QLV4_TOXGV	35 kDa	INF	825830	0	0	0	0	0
Uncharacterized protein OS=Toxoplasma gondii (strain ATCC 50861 / VEG) GN=BN1205_077290 PE=4 SV=1	B6KAX8_TOXGV	16 kDa	INF	1390300	0	0	0	0	0
Putative transmembrane protein OS=Toxoplasma gondii (strain ATCC 50861 / VEG) GN=TGVEG_225555 PE=4 SV=1	A0A125YN68_TOXGV	7 kDa	INF	10627000	10825000	7732300	0	0	0
40S ribosomal protein S26 OS=Toxoplasma gondii (strain ATCC 50861 / VEG) GN=BN1205_103450 PE=3 SV=1	B9PP49_TOXGV	13 kDa	INF	2162900	1376600	1657000	0	0	0
Uncharacterized protein OS=Toxoplasma gondii (strain ATCC 50861 / VEG) GN=BN1205_106920 PE=4 SV=1	B9QM74_TOXGV	45 kDa	INF	842960	484610	656020	0	0	0
Amylo-alpha-1,6-glucosidase OS=Toxoplasma gondii (strain ATCC 50861 / VEG) GN=TGVEG_226910 PE=4 SV=1	V4ZBE9_TOXGV	208 kDa	INF	2740200	0	0	0	0	0
Calmodulin, putative OS=Toxoplasma gondii (strain ATCC 50861 / VEG) GN=BN1205_106470 PE=4 SV=1	B9PZ33_TOXGV	15 kDa	INF	1186700	1114300	943490	0	0	0
Toxofilin OS=Toxoplasma gondii (strain ATCC 50861 / VEG) GN=BN1205_031770 PE=4 SV=1	B9QND9_TOXGV	27 kDa	INF	0	1444600	1164800	0	0	0
Putative calmodulin OS=Toxoplasma gondii (strain ATCC 50861 / VEG) GN=TGVEG_269442 PE=4 SV=1	A0A125YUM0_TOXGV	10 kDa	INF	0	0	5294600	0	0	0
Cytochrome C family oxidase subunit III subfamily protein (Fragment) OS=Toxoplasma gondii (strain ATCC 50861 / VEG) GN=TGVEG_442790 PE=4 SV=1	V4Z6L7_TOXGV	9 kDa	INF	0	0	15883000	0	0	0
Uncharacterized protein OS=Toxoplasma gondii (strain ATCC 50861 / VEG) GN=TGVEG_264090 PE=4 SV=1	V4ZHM6_TOXGV	320 kDa	INF	0	488110	0	0	0	0
IMC sub-compartment protein ISP3 OS=Toxoplasma gondii (strain ATCC 50861 / VEG) GN=BN1205_101640 PE=1 SV=1	B9PJE6_TOXGV	18 kDa	INF	1578200	2387000	2106900	0	0	0
Protein SEY1 homolog OS=Toxoplasma gondii (strain ATCC 50861 / VEG) GN=BN1205_100080 PE=3 SV=1	A0A125YGV4_TOXGV	98 kDa	INF	0	843480	0	0	0	0
Thioredoxin OS=Toxoplasma gondii (strain ATCC 50861 / VEG) GN=BN1205_013920 PE=3 SV=1	A0A0F7UN03_TOXGV	12 kDa	INF	0	834770	0	0	0	0
Uncharacterized protein OS=Toxoplasma gondii (strain ATCC 50861 / VEG) GN=BN1205_068715 PE=4 SV=1	A0A125YWV2_TOXGV	10 kDa	INF	1521900	1395200	0	0	0	0
Ribosomal protein L37a OS=Toxoplasma gondii (strain ATCC 50861 / VEG) GN=BN1205_007590 PE=3 SV=1	A0A0F7VBJ8_TOXGV	10 kDa	INF	0	1196600	0	0	0	0
Ribosomal protein L22, putative OS=Toxoplasma gondii (strain ATCC 50861 / VEG) GN=BN1205_094570 PE=3 SV=1	B9PJR5_TOXGV	16 kDa	INF	0	2711200	2036300	0	0	0
Putative vivax protein OS=Toxoplasma gondii (strain ATCC 50861 / VEG) GN=BN1205_068710 PE=4 SV=1	B9PN13_TOXGV	14 kDa	INF	0	894660	666860	0	0	0
Alba 1 OS=Toxoplasma gondii (strain ATCC 50861 / VEG) GN=BN1205_052050 PE=4 SV=1	B9PYK5_TOXGV	27 kDa	INF	0	581540	0	0	0	0
Isocitrate dehydrogenase OS=Toxoplasma gondii (strain ATCC 50861 / VEG) GN=BN1205_086250 PE=4 SV=1	A0A0F7UZR3_TOXGV	66 kDa	INF	484220	0	0	0	0	0
Putative transmembrane protein OS=Toxoplasma gondii (strain ATCC 50861 / VEG) GN=BN1205_058460 PE=4 SV=1	B9Q3N3_TOXGV	19 kDa	INF	1047200	18895000	0	0	0	0
Putative transmembrane protein OS=Toxoplasma gondii (strain ATCC 50861 / VEG) GN=BN1205_036850 PE=4 SV=1	B9Q3L4_TOXGV	15 kDa	INF	311800	0	0	0	0	0
Putative transmembrane protein OS=Toxoplasma gondii (strain ATCC 50861 / VEG) GN=BN1205_038120 PE=4 SV=1	B9Q0J5_TOXGV	16 kDa	INF	0	908450	0	0	0	0
TB2/DP1, HVA22 domain-containing protein OS=Toxoplasma gondii (strain ATCC 50861 / VEG) GN=BN1205_009445 PE=3 SV=1	A0A125YSH9_TOXGV	19 kDa	INF	0	0	2244300	0	0	0
CAM kinase, CDPK family TgCDPK1_2 (TGTPK4) OS=Toxoplasma gondii (strain ATCC 50861 / VEG) GN=BN1205_107290 PE=4 SV=1	A0A0F7V4V1_TOXGV	60 kDa	INF	0	914130	916570	0	0	0
Hyaluronan/mRNA-binding family protein OS=Toxoplasma gondii (strain ATCC 50861 / VEG) GN=BN1205_058780 PE=4 SV=1	A0A0F7UUM4_TOXGV	41 kDa	INF	850980	0	0	0	0	0
Ribosomal protein L34, putative OS=Toxoplasma gondii (strain ATCC 50861 / VEG) GN=BN1205_068510 PE=4 SV=1	B9PMZ3_TOXGV	15 kDa	INF	0	1589300	0	0	0	0
Phosphoglycerate mutase family protein OS=Toxoplasma gondii (strain ATCC 50861 / VEG) GN=BN1205_052130 PE=4 SV=1	V4Z3W6_TOXGV	48 kDa	INF	405440	0	0	0	0	0
Uncharacterized protein OS=Toxoplasma gondii (strain ATCC 50861 / VEG) GN=BN1205_078940 PE=4 SV=1	B6KAN6_TOXGV	30 kDa	INF	986110	0	0	0	0	0
Prohibitin, putative OS=Toxoplasma gondii (strain ATCC 50861 / VEG) GN=BN1205_022550 PE=4 SV=1	B9PGD2_TOXGV	32 kDa	INF	789580	0	0	0	0	0
Ribonucleoside-diphosphate reductase small subunit OS=Toxoplasma gondii (strain ATCC 50861 / VEG) GN=BN1205_036750 PE=4 SV=1	B6KVW8_TOXGV	45 kDa	INF	0	0	3754500	0	0	0
Putative T-complex protein 1 subunit alpha OS=Toxoplasma gondii (strain ATCC 50861 / VEG) GN=BN1205_025520 PE=3 SV=1	B9PHJ9_TOXGV	59 kDa	INF	73780	0	0	0	0	0
Proteasome subunit alpha type OS=Toxoplasma gondii (strain ATCC 50861 / VEG) GN=BN1205_037840 PE=3 SV=1	B6KT24_TOXGV	28 kDa	INF	119850	0	0	0	0	0
ATP-dependent RNA helicase, putative OS=Toxoplasma gondii (strain ATCC 50861 / VEG) GN=BN1205_037430 PE=4 SV=1	B9Q0C6_TOXGV	49 kDa	INF	230730	0	0	0	0	0
Protein transport protein Sec61 subunit beta OS=Toxoplasma gondii (strain ATCC 50861 / VEG) GN=BN1205_008900 PE=3 SV=1	B9PVN6_TOXGV	10 kDa	INF	0	0	849770	0	0	0
MORN repeat-containing protein OS=Toxoplasma gondii (strain ATCC 50861 / VEG) GN=BN1205_040360 PE=4 SV=1	B6KP13_TOXGV	40 kDa	INF	0	0	349120	0	0	0
LSM domain-containing protein OS=Toxoplasma gondii (strain ATCC 50861 / VEG) GN=BN1205_093790 PE=4 SV=1	B9PJJ4_TOXGV	14 kDa	INF	81836	0	0	0	0	0
Putative ubiquitin OS=Toxoplasma gondii (strain ATCC 50861 / VEG) GN=BN1205_003330 PE=4 SV=1	B6KH70_TOXGV	24 kDa	INF	0	0	277750	0	0	0
Uridine kinase OS=Toxoplasma gondii (strain ATCC 50861 / VEG) GN=TGVEG_316700 PE=4 SV=1	A0A125YME0_TOXGV	65 kDa	INF	0	0	0	0	0	0
Eukaryotic porin domain-containing protein OS=Toxoplasma gondii (strain ATCC 50861 / VEG) GN=BN1205_071460 PE=4 SV=1	B6KRZ3_TOXGV	51 kDa	0	0	0	0	3173900000	1756800000	2214700000	Tom40
Acetyl-coenzyme A synthetase OS=Toxoplasma gondii (strain ATCC 50861 / VEG) GN=TGVEG_266640 PE=3 SV=1	A0A125YT22_TOXGV	80 kDa	0	0	0	0	49018000	21307000	23821000
Alveolin domain containing intermediate filament IMC7 OS=Toxoplasma gondii (strain ATCC 50861 / VEG) GN=BN1205_052950 PE=4 SV=1	B9PYT6_TOXGV	47 kDa	0	0	0	0	45874000	42379000	46422000
EF hand domain-containing protein OS=Toxoplasma gondii (strain ATCC 50861 / VEG) GN=TGVEG_315860 PE=4 SV=1	V5BJC6_TOXGV	690 kDa	0	0	0	0	8459800	4823500	7429700
Bifunctional dihydrofolate reductase-thymidylate synthase OS=Toxoplasma gondii (strain ATCC 50861 / VEG) GN=TGVEG_249180 PE=3 SV=1	B9PR34_TOXGV	69 kDa	0	0	0	0	17947000	10702000	11142000
Putative nucleoporin FG repeat region protein OS=Toxoplasma gondii (strain ATCC 50861 / VEG) GN=BN1205_098490 PE=4 SV=1	A0A125YJZ0_TOXGV	594 kDa	0	0	0	0	14417000	3845000	6576200
Glutathione s-transferase, n-terminal domain containing protein OS=Toxoplasma gondii (strain ATCC 50861 / VEG) GN=BN1205_107480 PE=4 SV=1	B9PZA9_TOXGV	38 kDa	0	0	0	0	13610000	8621400	7710600
Uncharacterized protein OS=Toxoplasma gondii (strain ATCC 50861 / VEG) GN=BN1205_060270 PE=4 SV=1	B9PVX5_TOXGV	12 kDa	0	0	0	0	25949000	16514000	11614000
Alveolin domain containing intermediate filament IMC12 OS=Toxoplasma gondii (strain ATCC 50861 / VEG) GN=BN1205_003090 PE=4 SV=1	B6KH93_TOXGV	30 kDa	0	0	0	0	51518000	29999000	25927000
Uncharacterized protein OS=Toxoplasma gondii (strain ATCC 50861 / VEG) GN=BN1205_045640 PE=4 SV=1	V4ZLM3_TOXGV	151 kDa	0	0	0	0	7302000	3487200	3117200
Gpi16 subunit, GPI transamidase component protein OS=Toxoplasma gondii (strain ATCC 50861 / VEG) GN=BN1205_069890 PE=4 SV=1	B9Q3G3_TOXGV	84 kDa	0	0	0	0	12292000	2647300	6057300
Valyl-tRNA synthetase OS=Toxoplasma gondii (strain ATCC 50861 / VEG) GN=TGVEG_253290 PE=3 SV=1	A0A125YGV2_TOXGV	125 kDa	0	0	0	0	13068000	3168000	5907100
Nucleoside-triphosphatase (Fragment) OS=Toxoplasma gondii (strain ATCC 50861 / VEG) GN=TGVEG_442210 PE=3 SV=1	V4YID2_TOXGV	35 kDa	0	0	0	0	246570000	144860000	200470000
LisH protein OS=Toxoplasma gondii (strain ATCC 50861 / VEG) GN=BN1205_100000 PE=4 SV=1	B6K9F6_TOXGV	49 kDa	0	0	0	0	27731000	6547800	10640000
Corepressor complex CRC230 OS=Toxoplasma gondii (strain ATCC 50861 / VEG) GN=BN1205_106750 PE=4 SV=1	A0A0F7V117_TOXGV	207 kDa	0	0	0	0	4297500	2929000	2671400
Phosphodiesterase OS=Toxoplasma gondii (strain ATCC 50861 / VEG) GN=BN1205_089830 PE=3 SV=1	B6KFK7_TOXGV	143 kDa	0	0	0	0	9320800	1587900	2150000
Uncharacterized protein OS=Toxoplasma gondii (strain ATCC 50861 / VEG) GN=BN1205_097440 PE=4 SV=1	B9PIK4_TOXGV	32 kDa	0	0	0	0	6665800	15217000	3886600
Uncharacterized protein OS=Toxoplasma gondii (strain ATCC 50861 / VEG) GN=BN1205_084110 PE=4 SV=1	B9QE93_TOXGV	35 kDa	0	0	0	0	8892900	5251400	4295700
Glutathione reductase, putative OS=Toxoplasma gondii (strain ATCC 50861 / VEG) GN=BN1205_070710 PE=3 SV=1	V4Z8V1_TOXGV	69 kDa	0	0	0	0	12693000	4392000	3294900
Putative small GTPase Rab2 OS=Toxoplasma gondii (strain ATCC 50861 / VEG) GN=BN1205_096060 PE=4 SV=1	B9PK50_TOXGV	24 kDa	0	0	0	0	12120000	4420800	5294300
RuvB-like helicase OS=Toxoplasma gondii (strain ATCC 50861 / VEG) GN=BN1205_082720 PE=3 SV=1	B9PTV9_TOXGV	55 kDa	0	0	0	0	7502000	2616200	2997600
Putative eukaryotic initiation factor-2 beta OS=Toxoplasma gondii (strain ATCC 50861 / VEG) GN=BN1205_061840 PE=4 SV=1	B9PW77_TOXGV	26 kDa	0	0	0	0	8861900	3221200	3375900
Selenide, water dikinase OS=Toxoplasma gondii (strain ATCC 50861 / VEG) GN=BN1205_079830 PE=4 SV=1	V4ZM83_TOXGV	138 kDa	0	0	0	0	7384700	2829300	1363800
Alanine--tRNA ligase OS=Toxoplasma gondii (strain ATCC 50861 / VEG) GN=TGVEG_219540 PE=3 SV=1	V4Z4M5_TOXGV	139 kDa	0	0	0	0	9441900	3793600	3870100
Dense granule protein GRA8 OS=Toxoplasma gondii (strain ATCC 50861 / VEG) GN=TGVEG_254720 PE=4 SV=1	V4Z4U6_TOXGV	26 kDa	0	0	0	0	5861300	11724000	21858000
Uncharacterized protein OS=Toxoplasma gondii (strain ATCC 50861 / VEG) GN=BN1205_067630 PE=4 SV=1	B9PMQ4_TOXGV	15 kDa	0	0	0	0	10724000	15247000	13119000
Histone arginine methyltransferase PRMT5 OS=Toxoplasma gondii (strain ATCC 50861 / VEG) GN=BN1205_030240 PE=3 SV=1	B9QN11_TOXGV	107 kDa	0	0	0	0	4082700	2424400	1847200
p21-carboxy-terminal region-binding protein OS=Toxoplasma gondii (strain ATCC 50861 / VEG) GN=BN1205_069240 PE=4 SV=1	B9Q8H2_TOXGV	43 kDa	0	0	0	0	5869800	2310600	3470300
DnaJ domain-containing protein OS=Toxoplasma gondii (strain ATCC 50861 / VEG) GN=BN1205_097460 PE=4 SV=1	A0A125YKL8_TOXGV	32 kDa	0	0	0	0	9021200	2710200	2989400
Non-specific serine/threonine protein kinase OS=Toxoplasma gondii (strain ATCC 50861 / VEG) GN=BN1205_015350 PE=3 SV=1	B9Q562_TOXGV	904 kDa	0	0	0	0	7930000	4638100	5556900
Rhoptry kinase family protein ROP35 OS=Toxoplasma gondii (strain ATCC 50861 / VEG) GN=BN1205_041270 PE=4 SV=1	B9QR15_TOXGV	67 kDa	0	0	0	0	3774400	2802800	3383800
SPRY domain-containing protein OS=Toxoplasma gondii (strain ATCC 50861 / VEG) GN=BN1205_014840 PE=4 SV=1	A0A0F7UMU3_TOXGV	80 kDa	0	0	0	0	10480000	6307000	4592700
Tryptophanyl-tRNA synthetase (TrpRS2) OS=Toxoplasma gondii (strain ATCC 50861 / VEG) GN=TGVEG_288360 PE=4 SV=1	B9PU09_TOXGV	77 kDa	0	0	0	0	0	4367300	2740400
Putative transmembrane protein OS=Toxoplasma gondii (strain ATCC 50861 / VEG) GN=BN1205_038860 PE=4 SV=1	B9PXW3_TOXGV	23 kDa	0	0	0	0	23250000	5856900	10857000
Putative transmembrane protein OS=Toxoplasma gondii (strain ATCC 50861 / VEG) GN=BN1205_025070 PE=4 SV=1	B6KJD9_TOXGV	39 kDa	0	0	0	0	6647500	2780600	2393400
Dense granule protein 5 OS=Toxoplasma gondii (strain ATCC 50861 / VEG) GN=BN1205_033680 PE=4 SV=1	A0A0F7UV78_TOXGV	13 kDa	0	0	0	0	0	4991400	5728900
Putative transmembrane protein OS=Toxoplasma gondii (strain ATCC 50861 / VEG) GN=BN1205_004280 PE=4 SV=1	B6KGZ6_TOXGV	27 kDa	0	0	0	0	4810900	2497000	4164100
Phosphoglycerate mutase OS=Toxoplasma gondii (strain ATCC 50861 / VEG) GN=TGVEG_297060 PE=3 SV=1	A0A125YK30_TOXGV	38 kDa	0	0	0	0	2947300	2658500	2873100
S1/P1 nuclease OS=Toxoplasma gondii (strain ATCC 50861 / VEG) GN=BN1205_032660 PE=4 SV=1	B6KMV3_TOXGV	70 kDa	0	0	0	0	6341600	0	2515200
CHCH domain-containing protein OS=Toxoplasma gondii (strain ATCC 50861 / VEG) GN=BN1205_034270 PE=4 SV=1	B9PSH4_TOXGV	15 kDa	0	0	0	0	17033000	11270000	5251000
5'-nucleotidase, C-terminal domain-containing protein OS=Toxoplasma gondii (strain ATCC 50861 / VEG) GN=BN1205_091970 PE=4 SV=1	B9QKB4_TOXGV	96 kDa	0	0	0	0	8824700	3710700	5371100
DNA-directed RNA polymerase II RPB3 OS=Toxoplasma gondii (strain ATCC 50861 / VEG) GN=BN1205_036050 PE=4 SV=1	B6KGB1_TOXGV	52 kDa	0	0	0	0	4611500	0	1961600
Uncharacterized protein OS=Toxoplasma gondii (strain ATCC 50861 / VEG) GN=BN1205_027560 PE=4 SV=1	B6KRG4_TOXGV	130 kDa	0	0	0	0	6663200	1448300	3852500
Uncharacterized protein OS=Toxoplasma gondii (strain ATCC 50861 / VEG) GN=TGVEG_214575 PE=4 SV=1	A0A125YQL6_TOXGV	10 kDa	0	0	0	0	9466500	6196900	6798900
SAG-related sequence SRS29A OS=Toxoplasma gondii (strain ATCC 50861 / VEG) GN=BN1205_022090 PE=4 SV=1	B9Q4G2_TOXGV	44 kDa	0	0	0	0	2405200	2300000	2175900
Glycogenin-1, putative OS=Toxoplasma gondii (strain ATCC 50861 / VEG) GN=BN1205_094480 PE=4 SV=1	B6KAA8_TOXGV	39 kDa	0	0	0	0	2554000	6450600	7670200
Uncharacterized protein OS=Toxoplasma gondii (strain ATCC 50861 / VEG) GN=BN1205_058620 PE=4 SV=1	A0A0F7V2Q1_TOXGV	65 kDa	0	0	0	0	5524800	2060100	3717300
Serine-threonine phosophatase 2C OS=Toxoplasma gondii (strain ATCC 50861 / VEG) GN=BN1205_023920 PE=4 SV=1	A0A0F7UXX2_TOXGV	37 kDa	0	0	0	0	4379600	2266300	3859400
PLU-1 family protein OS=Toxoplasma gondii (strain ATCC 50861 / VEG) GN=TGVEG_253750 PE=4 SV=1	V4Z4I1_TOXGV	856 kDa	0	0	0	0	4768900	1780600	1207000
EF-1 guanine nucleotide exchange domain-containing protein OS=Toxoplasma gondii (strain ATCC 50861 / VEG) GN=BN1205_070700 PE=4 SV=1	B9PQK6_TOXGV	21 kDa	0	0	0	0	8361200	3542300	3568800
Nucleoredoxin OS=Toxoplasma gondii (strain ATCC 50861 / VEG) GN=BN1205_023230 PE=4 SV=1	A0A0F7UXJ4_TOXGV	25 kDa	0	0	0	0	6087100	5503000	1214500
Leucine rich repeat protein OS=Toxoplasma gondii (strain ATCC 50861 / VEG) GN=BN1205_097430 PE=4 SV=1	B6K924_TOXGV	175 kDa	0	0	0	0	3084500	3506600	5141100
Inosine-5'-monophosphate dehydrogenase OS=Toxoplasma gondii (strain ATCC 50861 / VEG) GN=BN1205_022540 PE=3 SV=1	B6KJZ7_TOXGV	59 kDa	0	0	0	0	4477600	2919200	2813100
Uncharacterized protein OS=Toxoplasma gondii (strain ATCC 50861 / VEG) GN=TGVEG_269290 PE=4 SV=1	V4Z880_TOXGV	503 kDa	0	0	0	0	5454800	1058900	1569700
Coatomer protein complex subunit beta, putative OS=Toxoplasma gondii (strain ATCC 50861 / VEG) GN=BN1205_062230 PE=4 SV=1	V5B518_TOXGV	137 kDa	0	0	0	0	5091600	962610	3830500
Photosensitized INA-labeled protein PHIL1 OS=Toxoplasma gondii (strain ATCC 50861 / VEG) GN=BN1205_076060 PE=4 SV=1	A0A0F7V159_TOXGV	19 kDa	0	0	0	0	9014700	10999000	1460900
Succinate--CoA ligase [ADP-forming] subunit beta, mitochondrial OS=Toxoplasma gondii (strain ATCC 50861 / VEG) GN=BN1205_093800 PE=3 SV=1	A0A0F7V455_TOXGV	53 kDa	0	0	0	0	4758800	2112300	2683000
Nucleoporin OS=Toxoplasma gondii (strain ATCC 50861 / VEG) GN=TGVEG_273850 PE=4 SV=1	V5BLS9_TOXGV	69 kDa	0	0	0	0	2830200	1196400	2349900
Calcium-dependent protein kinase CDPK2A OS=Toxoplasma gondii (strain ATCC 50861 / VEG) GN=TGVEG_206590 PE=4 SV=1	A0A125YR92_TOXGV	86 kDa	0	0	0	0	3170000	832500	1498500
Protein phosphatase 2C, putative OS=Toxoplasma gondii (strain ATCC 50861 / VEG) GN=BN1205_088560 PE=3 SV=1	B9QPL6_TOXGV	72 kDa	0	0	0	0	11013000	4183900	4868800
Protoporphyrinogen oxidase OS=Toxoplasma gondii (strain ATCC 50861 / VEG) GN=BN1205_020000 PE=4 SV=1	B9PIE2_TOXGV	109 kDa	0	0	0	0	3844400	1212100	978820
Uncharacterized protein OS=Toxoplasma gondii (strain ATCC 50861 / VEG) GN=BN1205_038190 PE=4 SV=1	A0A125YSL9_TOXGV	90 kDa	0	0	0	0	3748700	1641800	2571400
Glucosephosphate-mutase GPM1 OS=Toxoplasma gondii (strain ATCC 50861 / VEG) GN=BN1205_033350 PE=4 SV=1	A0A0F7USE7_TOXGV	71 kDa	0	0	0	0	3200400	2362800	2553400
GYF domain-containing protein OS=Toxoplasma gondii (strain ATCC 50861 / VEG) GN=BN1205_105560 PE=4 SV=1	B9QRA2_TOXGV	238 kDa	0	0	0	0	2871500	742080	1855400
Putative transmembrane protein OS=Toxoplasma gondii (strain ATCC 50861 / VEG) GN=TGVEG_293320 PE=4 SV=1	A0A125YPU4_TOXGV	198 kDa	0	0	0	0	3682700	1562600	2068800
Flavodoxin domain-containing protein OS=Toxoplasma gondii (strain ATCC 50861 / VEG) GN=BN1205_070320 PE=4 SV=1	B9PQP5_TOXGV	104 kDa	0	0	0	0	3760600	1490800	2192200
Ribosomal protein L11, putative OS=Toxoplasma gondii (strain ATCC 50861 / VEG) GN=BN1205_093880 PE=3 SV=1	B9PJK2_TOXGV	20 kDa	0	0	0	0	4181600	2679300	1736000
Polypyrimidine track-binding protein, putative OS=Toxoplasma gondii (strain ATCC 50861 / VEG) GN=BN1205_084070 PE=4 SV=1	B9PTG9_TOXGV	48 kDa	0	0	0	0	1925400	1420400	1565300
Putative TCP-1 chaperonin OS=Toxoplasma gondii (strain ATCC 50861 / VEG) GN=BN1205_009820 PE=3 SV=1	B9PVE9_TOXGV	59 kDa	0	0	0	0	4889700	1492900	1373500
Putative vacuolar ATP synthase subunit A OS=Toxoplasma gondii (strain ATCC 50861 / VEG) GN=BN1205_077490 PE=3 SV=1	B6KAW0_TOXGV	68 kDa	0	0	0	0	1861400	2085600	2045900
Uncharacterized protein OS=Toxoplasma gondii (strain ATCC 50861 / VEG) GN=BN1205_030180 PE=4 SV=1	V4Z766_TOXGV	202 kDa	0	0	0	0	4809300	1887100	2129900
SAG-related sequence SRS25 OS=Toxoplasma gondii (strain ATCC 50861 / VEG) GN=BN1205_035070 PE=4 SV=1	B9PSP5_TOXGV	21 kDa	0	0	0	0	10179000	8265800	8228800
Protein transport protein Sec61 alpha subunit isoform 1, putative OS=Toxoplasma gondii (strain ATCC 50861 / VEG) GN=BN1205_017200 PE=3 SV=1	B9PHN7_TOXGV	52 kDa	0	0	0	0	5715600	0	0
Pyruvate dehydrogenase complex subunit PDH-E3I OS=Toxoplasma gondii (strain ATCC 50861 / VEG) GN=TGVEG_305980 PE=3 SV=1	A0A125YHJ5_TOXGV	67 kDa	0	0	0	0	1482800	1529300	1631700
T-complex protein 1 subunit gamma OS=Toxoplasma gondii (strain ATCC 50861 / VEG) GN=BN1205_043850 PE=3 SV=1	B9Q045_TOXGV	61 kDa	0	0	0	0	2631700	1649900	3469200
Kelch repeat-containing protein OS=Toxoplasma gondii (strain ATCC 50861 / VEG) GN=TGVEG_234490 PE=4 SV=1	V5B549_TOXGV	164 kDa	0	0	0	0	10439000	2139900	4106300
Dihydrolipoyl dehydrogenase OS=Toxoplasma gondii (strain ATCC 50861 / VEG) GN=BN1205_043130 PE=3 SV=1	B9QF24_TOXGV	55 kDa	0	0	0	0	0	1374800	1630900
Putative transmembrane protein OS=Toxoplasma gondii (strain ATCC 50861 / VEG) GN=BN1205_095330 PE=4 SV=1	B6K8J1_TOXGV	505 kDa	0	0	0	0	7679700	4871300	4747100
N-ethylmaleimide-sensitive factor OS=Toxoplasma gondii (strain ATCC 50861 / VEG) GN=BN1205_009910 PE=4 SV=1	B9PVD8_TOXGV	83 kDa	0	0	0	0	5641900	1457200	4516100
RAVE 1 carboxy-terminal protein OS=Toxoplasma gondii (strain ATCC 50861 / VEG) GN=BN1205_025510 PE=4 SV=1	V4ZPY4_TOXGV	690 kDa	0	0	0	0	5447500	1019400	435960
Alveolin domain containing intermediate filament IMC10 OS=Toxoplasma gondii (strain ATCC 50861 / VEG) GN=BN1205_025290 PE=4 SV=1	B6KJB9_TOXGV	61 kDa	0	0	0	0	0	7071000	0
Rhoptry protein ROP13 OS=Toxoplasma gondii (strain ATCC 50861 / VEG) GN=BN1205_096370 PE=4 SV=1	A0A0F7V8G6_TOXGV	45 kDa	0	0	0	0	4430900	0	1799800
Asparaginase, putative OS=Toxoplasma gondii (strain ATCC 50861 / VEG) GN=BN1205_082500 PE=4 SV=1	B9QDU8_TOXGV	71 kDa	0	0	0	0	4571300	2424900	2475300
Putative transmembrane protein OS=Toxoplasma gondii (strain ATCC 50861 / VEG) GN=BN1205_043540 PE=4 SV=1	B9QF45_TOXGV	141 kDa	0	0	0	0	1623400	826420	1413300
Uncharacterized protein OS=Toxoplasma gondii (strain ATCC 50861 / VEG) GN=BN1205_025340 PE=4 SV=1	B9PHI3_TOXGV	16 kDa	0	0	0	0	11540000	13386000	1092600
Uncharacterized protein OS=Toxoplasma gondii (strain ATCC 50861 / VEG) GN=BN1205_069700 PE=4 SV=1	B9Q3H1_TOXGV	45 kDa	0	0	0	0	1441300	2789500	1882100
AMP-binding enzyme OS=Toxoplasma gondii (strain ATCC 50861 / VEG) GN=BN1205_065730 PE=4 SV=1	V4ZEZ5_TOXGV	117 kDa	0	0	0	0	3238100	1514800	1294200
p97 protein OS=Toxoplasma gondii (strain ATCC 50861 / VEG) GN=BN1205_055600 PE=4 SV=1	B9QIN9_TOXGV	101 kDa	0	0	0	0	0	0	837740
Ribosomal protein L15 OS=Toxoplasma gondii (strain ATCC 50861 / VEG) GN=BN1205_069230 PE=3 SV=1	B9PN66_TOXGV	24 kDa	0	0	0	0	0	0	2644200
Acyl-CoA thioester hydrolase, putative OS=Toxoplasma gondii (strain ATCC 50861 / VEG) GN=BN1205_080980 PE=4 SV=1	A0A125YI82_TOXGV	58 kDa	0	0	0	0	4302500	1759400	2006700
Ubiquitin family domain-containing protein OS=Toxoplasma gondii (strain ATCC 50861 / VEG) GN=BN1205_035400 PE=4 SV=1	B9QGK9_TOXGV	119 kDa	0	0	0	0	5689700	2244300	3227100
Aminotransferase, class V superfamily protein OS=Toxoplasma gondii (strain ATCC 50861 / VEG) GN=BN1205_008950 PE=4 SV=1	V4Z6Q0_TOXGV	68 kDa	0	0	0	0	1383000	1000600	404180
CMGC kinase, GSK family TgPK3 OS=Toxoplasma gondii (strain ATCC 50861 / VEG) GN=BN1205_081010 PE=3 SV=1	B9Q1F6_TOXGV	44 kDa	0	0	0	0	6434800	2313100	3318200
EF hand domain-containing protein OS=Toxoplasma gondii (strain ATCC 50861 / VEG) GN=BN1205_078590 PE=4 SV=1	B6KAQ0_TOXGV	16 kDa	0	0	0	0	0	2200100	2878800
Hydrolase, NUDIX family protein OS=Toxoplasma gondii (strain ATCC 50861 / VEG) GN=TGVEG_282190 PE=4 SV=1	V4ZC27_TOXGV	39 kDa	0	0	0	0	6810200	1167400	2404700
Rhoptry protein ROP9 OS=Toxoplasma gondii (strain ATCC 50861 / VEG) GN=BN1205_103560 PE=4 SV=1	A0A125YHP1_TOXGV	38 kDa	0	0	0	0	3115700	2529500	1755600
Rab GDP dissociation inhibitor OS=Toxoplasma gondii (strain ATCC 50861 / VEG) GN=BN1205_047060 PE=3 SV=1	B9PUM5_TOXGV	51 kDa	0	0	0	0	2264800	865000	1755600
Rhoptry neck protein RON8 OS=Toxoplasma gondii (strain ATCC 50861 / VEG) GN=TGVEG_306060 PE=4 SV=1	A0A125YRV5_TOXGV	329 kDa	0	0	0	0	1672600	2239500	3264400
Cytidine and deoxycytidylate deaminase zinc-binding region domain-containing protein OS=Toxoplasma gondii (strain ATCC 50861 / VEG) GN=BN1205_091960 PE=4 SV=1	A0A125YN60_TOXGV	47 kDa	0	0	0	0	2682900	0	1359900
RNA recognition motif-containing protein OS=Toxoplasma gondii (strain ATCC 50861 / VEG) GN=TGVEG_264610 PE=4 SV=1	B9Q3U3_TOXGV	45 kDa	0	0	0	0	4509400	0	1272100
Alpha-soluble NSF attachment protein, putative OS=Toxoplasma gondii (strain ATCC 50861 / VEG) GN=BN1205_071080 PE=4 SV=1	B9PQH9_TOXGV	36 kDa	0	0	0	0	4312600	2509800	1841500
Putative RNA binding protein OS=Toxoplasma gondii (strain ATCC 50861 / VEG) GN=BN1205_045880 PE=4 SV=1	A0A125YXN4_TOXGV	119 kDa	0	0	0	0	1880000	1306200	1437100
Dehydrogenase E1 component family protein OS=Toxoplasma gondii (strain ATCC 50861 / VEG) GN=TGVEG_239490 PE=4 SV=1	A0A125YLZ8_TOXGV	64 kDa	0	0	0	0	6128000	1895300	3432300
Cathepsin B OS=Toxoplasma gondii (strain ATCC 50861 / VEG) GN=BN1205_002170 PE=3 SV=1	B6KHH7_TOXGV	62 kDa	0	0	0	0	7158600	2053300	1530000
Actin, putative OS=Toxoplasma gondii (strain ATCC 50861 / VEG) GN=BN1205_003160 PE=3 SV=1	B9PQT4_TOXGV	42 kDa	0	0	0	0	4561100	0	2203900
E3 UFM1-protein ligase 1 homolog, related OS=Toxoplasma gondii (strain ATCC 50861 / VEG) GN=BN1205_053080 PE=4 SV=1	V4ZCB3_TOXGV	83 kDa	0	0	0	0	5917900	948540	2685800
Alpha-1,4 glucan phosphorylase OS=Toxoplasma gondii (strain ATCC 50861 / VEG) GN=BN1205_094750 PE=3 SV=1	A0A125YFU7_TOXGV	106 kDa	0	0	0	0	0	637580	273580
ATP-dependent RNA helicase, putative OS=Toxoplasma gondii (strain ATCC 50861 / VEG) GN=BN1205_097040 PE=3 SV=1	B6K8Y9_TOXGV	53 kDa	0	0	0	0	0	0	3346000
Major facilitator superfamily domain-containing protein OS=Toxoplasma gondii (strain ATCC 50861 / VEG) GN=BN1205_011117 PE=4 SV=1	V4Z712_TOXGV	63 kDa	0	0	0	0	5659700	1478500	3331400
Ser/Thr phosphatase family protein OS=Toxoplasma gondii (strain ATCC 50861 / VEG) GN=TGVEG_226072 PE=4 SV=1	V4ZJK8_TOXGV	88 kDa	0	0	0	0	2856800	1095000	1149300
Nascent polypeptide-associated complex subunit beta OS=Toxoplasma gondii (strain ATCC 50861 / VEG) GN=TGVEG_257090 PE=3 SV=1	A0A125YTJ2_TOXGV	39 kDa	0	0	0	0	1522100	380820	1490300
Histone H2A OS=Toxoplasma gondii (strain ATCC 50861 / VEG) GN=BN1205_073130 PE=3 SV=1	A0A0F7UVP8_TOXGV	15 kDa	0	0	0	0	0	25591000	10432000
Nicotinate-nucleotide adenylyltransferase OS=Toxoplasma gondii (strain ATCC 50861 / VEG) GN=BN1205_107260 PE=4 SV=1	A0A0F7V151_TOXGV	49 kDa	0	0	0	0	0	2309600	2886800
ER-trafficking TRAPP I complex 85 kDa subunit OS=Toxoplasma gondii (strain ATCC 50861 / VEG) GN=BN1205_031270 PE=4 SV=1	V4ZFK6_TOXGV	354 kDa	0	0	0	0	3196700	0	885710
Putative transmembrane protein OS=Toxoplasma gondii (strain ATCC 50861 / VEG) GN=TGVEG_246580 PE=4 SV=1	A0A125YJ88_TOXGV	43 kDa	0	0	0	0	3827000	694200	1708300
Sortilin OS=Toxoplasma gondii (strain ATCC 50861 / VEG) GN=TGVEG_290160 PE=4 SV=1	A0A125YTK3_TOXGV	114 kDa	0	0	0	0	2262500	0	3164600
Josephin protein OS=Toxoplasma gondii (strain ATCC 50861 / VEG) GN=BN1205_025850 PE=4 SV=1	B9PHR9_TOXGV	47 kDa	0	0	0	0	1306000	1066300	2310200
2OG-Fe(II) oxygenase family protein OS=Toxoplasma gondii (strain ATCC 50861 / VEG) GN=BN1205_084230 PE=4 SV=1	V4ZFB1_TOXGV	101 kDa	0	0	0	0	2632700	1017900	1123700
RuvB-like helicase OS=Toxoplasma gondii (strain ATCC 50861 / VEG) GN=BN1205_070360 PE=3 SV=1	B6KS88_TOXGV	53 kDa	0	0	0	0	2548800	0	2537200
Aspartate-tRNA ligase OS=Toxoplasma gondii (strain ATCC 50861 / VEG) GN=BN1205_046930 PE=3 SV=1	V4ZGI5_TOXGV	87 kDa	0	0	0	0	2659300	0	1487600
Uncharacterized protein (Fragment) OS=Toxoplasma gondii (strain ATCC 50861 / VEG) GN=TGVEG_227060A PE=4 SV=1	V4ZKA8_TOXGV	27 kDa	0	0	0	0	0	1342200	0
Clathrin light chain OS=Toxoplasma gondii (strain ATCC 50861 / VEG) GN=BN1205_035190 PE=3 SV=1	B6KT79_TOXGV	35 kDa	0	0	0	0	0	2029100	1662700
T-complex protein beta subunit OS=Toxoplasma gondii (strain ATCC 50861 / VEG) GN=BN1205_103530 PE=3 SV=1	A0A125YLE5_TOXGV	61 kDa	0	0	0	0	0	917190	1063600
26S proteasome non-ATPase regulatory subunit,putative OS=Toxoplasma gondii (strain ATCC 50861 / VEG) GN=BN1205_049350 PE=4 SV=1	B9Q0T7_TOXGV	76 kDa	0	0	0	0	0	1967200	1923300
Putative transmembrane protein OS=Toxoplasma gondii (strain ATCC 50861 / VEG) GN=BN1205_067370 PE=4 SV=1	B9Q806_TOXGV	43 kDa	0	0	0	0	0	0	912170
26S proteasome non-ATPase regulatory subunit 4,putative OS=Toxoplasma gondii (strain ATCC 50861 / VEG) GN=BN1205_064440 PE=4 SV=1	B9PM09_TOXGV	41 kDa	0	0	0	0	0	99865	555320
Rhoptry kinase family protein ROP16 OS=Toxoplasma gondii (strain ATCC 50861 / VEG) GN=BN1205_071990 PE=4 SV=1	A0A0F7UVV5_TOXGV	76 kDa	0	0	0	0	0	1157600	1254600
Ubiquitin-activating enzyme E1 family protein OS=Toxoplasma gondii (strain ATCC 50861 / VEG) GN=TGVEG_290290 PE=3 SV=1	V4ZP46_TOXGV	120 kDa	0	0	0	0	2130900	0	2085900
Uncharacterized protein OS=Toxoplasma gondii (strain ATCC 50861 / VEG) GN=TGVEG_286230 PE=4 SV=1	V4ZEA4_TOXGV	279 kDa	0	0	0	0	2810200	0	1334200
Actin depolymerizing factor OS=Toxoplasma gondii (strain ATCC 50861 / VEG) GN=BN1205_087130 PE=1 SV=1	B9Q2C8_TOXGV	13 kDa	0	0	0	0	0	0	5581600
Adenylate kinase, putative OS=Toxoplasma gondii (strain ATCC 50861 / VEG) GN=BN1205_065740 PE=3 SV=1	B9PM93_TOXGV	29 kDa	0	0	0	0	2372000	325160	2429900
Putative mRNA decapping enzyme OS=Toxoplasma gondii (strain ATCC 50861 / VEG) GN=TGVEG_209108 PE=4 SV=1	A0A125YGU8_TOXGV	41 kDa	0	0	0	0	1462700	1283600	2226300
Eukaryotic initiation factor-2B gamma subunit,putative OS=Toxoplasma gondii (strain ATCC 50861 / VEG) GN=BN1205_038040 PE=4 SV=1	A0A125YNU4_TOXGV	58 kDa	0	0	0	0	0	1257200	830340
Creatinase domain-containing protein OS=Toxoplasma gondii (strain ATCC 50861 / VEG) GN=TGVEG_261600 PE=3 SV=1	V4ZDK2_TOXGV	96 kDa	0	0	0	0	1753000	0	2102600
Prp31-15.5k-U4 Snrna Complex family protein OS=Toxoplasma gondii (strain ATCC 50861 / VEG) GN=TGVEG_236580 PE=4 SV=1	A0A125YFG9_TOXGV	20 kDa	0	0	0	0	0	2743100	2683700
Uncharacterized protein OS=Toxoplasma gondii (strain ATCC 50861 / VEG) GN=BN1205_091510 PE=4 SV=1	B6KFA4_TOXGV	89 kDa	0	0	0	0	0	2911300	4013500
Cytochrome c heme lyase OS=Toxoplasma gondii (strain ATCC 50861 / VEG) GN=BN1205_014500 PE=3 SV=1	B9PY27_TOXGV	43 kDa	0	0	0	0	2979900	0	0
CCR4-Not complex component, Not1 protein OS=Toxoplasma gondii (strain ATCC 50861 / VEG) GN=TGVEG_291140 PE=4 SV=1	B9QEC7_TOXGV	266 kDa	0	0	0	0	1537300	447370	2012400
Ferredoxin-fold anticodon binding domain-containing protein OS=Toxoplasma gondii (strain ATCC 50861 / VEG) GN=BN1205_008710 PE=4 SV=1	V5B1C6_TOXGV	96 kDa	0	0	0	0	2068500	1115800	1042400
Uncharacterized protein OS=Toxoplasma gondii (strain ATCC 50861 / VEG) GN=BN1205_082020 PE=4 SV=1	B9QF02_TOXGV	197 kDa	0	0	0	0	1345500	0	0
WD domain, G-beta repeat-containing protein OS=Toxoplasma gondii (strain ATCC 50861 / VEG) GN=BN1205_017130 PE=4 SV=1	B9Q5S7_TOXGV	107 kDa	0	0	0	0	1369200	1967500	1685700
TPR domain-containing protein OS=Toxoplasma gondii (strain ATCC 50861 / VEG) GN=BN1205_072750 PE=4 SV=1	B9QAT9_TOXGV	53 kDa	0	0	0	0	0	1587200	0
Glutamate/leucine/phenylalanine/valine dehydrogenase family protein OS=Toxoplasma gondii (strain ATCC 50861 / VEG) GN=TGVEG_249390 PE=4 SV=1	A0A125YQU5_TOXGV	136 kDa	0	0	0	0	2471600	1648000	1202100
Glucose-6-phosphate 1-dehydrogenase OS=Toxoplasma gondii (strain ATCC 50861 / VEG) GN=TGVEG_278830 PE=3 SV=1	B6KRW3_TOXGV	98 kDa	0	0	0	0	0	1851600	1555500
Uncharacterized protein OS=Toxoplasma gondii (strain ATCC 50861 / VEG) GN=TGVEG_217510 PE=4 SV=1	A0A125YQG1_TOXGV	42 kDa	0	0	0	0	5254000	0	1029900
Autophagy-related protein 3 OS=Toxoplasma gondii (strain ATCC 50861 / VEG) GN=BN1205_061200 PE=3 SV=1	B9Q737_TOXGV	43 kDa	0	0	0	0	3981200	0	1963100
Dense granule protein GRA14 OS=Toxoplasma gondii (strain ATCC 50861 / VEG) GN=BN1205_091840 PE=4 SV=1	B6KF82_TOXGV	45 kDa	0	0	0	0	0	0	1766300
Putative P-type ATPase4 OS=Toxoplasma gondii (strain ATCC 50861 / VEG) GN=BN1205_029270 PE=3 SV=1	B9QMJ0_TOXGV	145 kDa	0	0	0	0	0	1154200	1834000
Splicing factor U2AF family SnRNP auxilary factor large subunit, RRM domain-containing protein OS=Toxoplasma gondii (strain ATCC 50861 / VEG) GN=BN1205_010950 PE=4 SV=1	A0A125YLP2_TOXGV	52 kDa	0	0	0	0	0	881030	1720200
Thioredoxin domain-containing protein OS=Toxoplasma gondii (strain ATCC 50861 / VEG) GN=BN1205_004650 PE=4 SV=1	B9PPS0_TOXGV	34 kDa	0	0	0	0	2109800	1206500	0
Transaldolase (Fragment) OS=Toxoplasma gondii (strain ATCC 50861 / VEG) GN=TGVEG_229360 PE=4 SV=1	V4Z5V1_TOXGV	25 kDa	0	0	0	0	1874400	0	2746700
26S proteasome non-ATPase subunit, putative OS=Toxoplasma gondii (strain ATCC 50861 / VEG) GN=BN1205_017070 PE=4 SV=1	B9PHM3_TOXGV	35 kDa	0	0	0	0	0	390160	714000
Myb family DNA-binding domain-containing protein OS=Toxoplasma gondii (strain ATCC 50861 / VEG) GN=BN1205_034320 PE=4 SV=1	B9QGB3_TOXGV	107 kDa	0	0	0	0	2073900	756170	1431600
Phosphotransferase OS=Toxoplasma gondii (strain ATCC 50861 / VEG) GN=BN1205_080890 PE=3 SV=1	B9QEP9_TOXGV	51 kDa	0	0	0	0	382680	873790	844020
p25-alpha domain-containing protein OS=Toxoplasma gondii (strain ATCC 50861 / VEG) GN=BN1205_025580 PE=4 SV=1	B9PHK3_TOXGV	17 kDa	0	0	0	0	1803400	1421800	1046100
Uncharacterized protein OS=Toxoplasma gondii (strain ATCC 50861 / VEG) GN=BN1205_023640 PE=4 SV=1	B6KJR0_TOXGV	48 kDa	0	0	0	0	0	1772400	872170
ThiF family domain-containing protein OS=Toxoplasma gondii (strain ATCC 50861 / VEG) GN=BN1205_021430 PE=4 SV=1	B6KDT5_TOXGV	85 kDa	0	0	0	0	3212000	179680	1972100
Putative vacuolar atp synthase subunit e OS=Toxoplasma gondii (strain ATCC 50861 / VEG) GN=TGVEG_305290 PE=3 SV=1	A0A125YNC7_TOXGV	39 kDa	0	0	0	0	941300	1084900	707550
Central domain galactose oxidase OS=Toxoplasma gondii (strain ATCC 50861 / VEG) GN=BN1205_045940 PE=4 SV=1	V4ZCW7_TOXGV	146 kDa	0	0	0	0	1497600	0	0
Glutamine synthetase, putative OS=Toxoplasma gondii (strain ATCC 50861 / VEG) GN=BN1205_020740 PE=3 SV=1	B6KDM7_TOXGV	65 kDa	0	0	0	0	2059300	0	2256900
Putative transmembrane protein OS=Toxoplasma gondii (strain ATCC 50861 / VEG) GN=BN1205_004590 PE=4 SV=1	B9PPR4_TOXGV	14 kDa	0	0	0	0	0	0	1251200
Uncharacterized protein OS=Toxoplasma gondii (strain ATCC 50861 / VEG) GN=TGVEG_254410 PE=4 SV=1	V4Z8R9_TOXGV	67 kDa	0	0	0	0	0	1181800	0
XPG N-terminal domain-containing protein OS=Toxoplasma gondii (strain ATCC 50861 / VEG) GN=TGVEG_212250 PE=4 SV=1	V5B9R9_TOXGV	48 kDa	0	0	0	0	0	1461900	1729100
Putative transmembrane protein OS=Toxoplasma gondii (strain ATCC 50861 / VEG) GN=BN1205_069300 PE=4 SV=1	A0A125YJ46_TOXGV	35 kDa	0	0	0	0	0	0	219350
Putative transmembrane protein OS=Toxoplasma gondii (strain ATCC 50861 / VEG) GN=BN1205_067575 PE=4 SV=1	A0A125YZE9_TOXGV	11 kDa	0	0	0	0	0	536640	644460
Homocysteine S-methyltransferase-1 OS=Toxoplasma gondii (strain ATCC 50861 / VEG) GN=BN1205_076690 PE=4 SV=1	B6KB25_TOXGV	47 kDa	0	0	0	0	1713900	0	1382800
Heat shock protein HSP21 OS=Toxoplasma gondii (strain ATCC 50861 / VEG) GN=BN1205_096720 PE=3 SV=1	A0A0F7VA04_TOXGV	21 kDa	0	0	0	0	0	977830	1888400
Uncharacterized protein OS=Toxoplasma gondii (strain ATCC 50861 / VEG) GN=BN1205_031280 PE=4 SV=1	V4Z6Z0_TOXGV	434 kDa	0	0	0	0	3633800	0	0
Nucleolar protein 5A, putative OS=Toxoplasma gondii (strain ATCC 50861 / VEG) GN=BN1205_004330 PE=4 SV=1	B9PPQ9_TOXGV	60 kDa	0	0	0	0	1612000	513620	728900
Uncharacterized protein OS=Toxoplasma gondii (strain ATCC 50861 / VEG) GN=BN1205_020190 PE=4 SV=1	B9PFS7_TOXGV	28 kDa	0	0	0	0	1395500	400770	2167600
Cytosolic Fe-S cluster assembly factor NUBP1 homolog OS=Toxoplasma gondii (strain ATCC 50861 / VEG) GN=BN1205_080110 PE=3 SV=1	V5BD76_TOXGV	43 kDa	0	0	0	0	3598400	404250	1055500
Putative thioredoxin OS=Toxoplasma gondii (strain ATCC 50861 / VEG) GN=BN1205_038570 PE=4 SV=1	B6KPH1_TOXGV	48 kDa	0	0	0	0	846030	1104000	749140
KH domain protein OS=Toxoplasma gondii (strain ATCC 50861 / VEG) GN=TGVEG_241170 PE=4 SV=1	A0A125YU86_TOXGV	140 kDa	0	0	0	0	1594600	0	671520
RNA recognition motif-containing protein OS=Toxoplasma gondii (strain ATCC 50861 / VEG) GN=BN1205_046590 PE=4 SV=1	B9PUI6_TOXGV	56 kDa	0	0	0	0	1395400	778950	780310
Rhoptry kinase family protein ROP39 OS=Toxoplasma gondii (strain ATCC 50861 / VEG) GN=BN1205_072800 PE=4 SV=1	V4Z9F7_TOXGV	65 kDa	0	0	0	0	0	0	643730
Putative thioredoxin OS=Toxoplasma gondii (strain ATCC 50861 / VEG) GN=BN1205_064730 PE=4 SV=1	B9PM19_TOXGV	69 kDa	0	0	0	0	3154600	1000500	1565700
Uncharacterized protein OS=Toxoplasma gondii (strain ATCC 50861 / VEG) GN=BN1205_101440 PE=4 SV=1	B6K9S7_TOXGV	27 kDa	0	0	0	0	0	3684300	0
Protease inhibitor PI1 OS=Toxoplasma gondii (strain ATCC 50861 / VEG) GN=BN1205_007100 PE=3 SV=1	B6KTY7_TOXGV	48 kDa	0	0	0	0	1997300	0	849700
Proteasome subunit alpha type OS=Toxoplasma gondii (strain ATCC 50861 / VEG) GN=BN1205_002250 PE=3 SV=1	B9PR77_TOXGV	28 kDa	0	0	0	0	0	1008300	1671000
Ribosomal-ubiquitin protein RPS27A OS=Toxoplasma gondii (strain ATCC 50861 / VEG) GN=BN1205_006260 PE=4 SV=1	B9PQ37_TOXGV	17 kDa	0	0	0	0	0	764350	0
HEAT repeat-containing protein OS=Toxoplasma gondii (strain ATCC 50861 / VEG) GN=BN1205_037700 PE=4 SV=1	A0A0F7V611_TOXGV	111 kDa	0	0	0	0	0	551030	472590
Myosin heavy chain, putative OS=Toxoplasma gondii (strain ATCC 50861 / VEG) GN=BN1205_040020 PE=4 SV=1	B9QL03_TOXGV	125 kDa	0	0	0	0	5389200	0	986550
GPI transamidase subunit PIG-U protein OS=Toxoplasma gondii (strain ATCC 50861 / VEG) GN=BN1205_028320 PE=4 SV=1	A0A125YKP3_TOXGV	61 kDa	0	0	0	0	1835100	0	726920
Inner membrane complex protein IMC2A OS=Toxoplasma gondii (strain ATCC 50861 / VEG) GN=BN1205_068950 PE=4 SV=1	B9Q8E3_TOXGV	182 kDa	0	0	0	0	1450500	2557700	0
ADA2-A transcriptional co-activator SAGA component OS=Toxoplasma gondii (strain ATCC 50861 / VEG) GN=BN1205_037130 PE=4 SV=1	B6KSV8_TOXGV	126 kDa	0	0	0	0	1815000	1471500	2242900
Glycerol-3-phosphate dehydrogenase OS=Toxoplasma gondii (strain ATCC 50861 / VEG) GN=BN1205_106180 PE=4 SV=1	B9QM22_TOXGV	19 kDa	0	0	0	0	2348900	0	1154000
Uncharacterized protein OS=Toxoplasma gondii (strain ATCC 50861 / VEG) GN=TGVEG_269710 PE=4 SV=1	V5BMI9_TOXGV	170 kDa	0	0	0	0	3043200	0	477460
Membrane-associated calcum-binding protein,related OS=Toxoplasma gondii (strain ATCC 50861 / VEG) GN=BN1205_025920 PE=4 SV=1	B6KJ69_TOXGV	38 kDa	0	0	0	0	553750	1878100	892290
Acetyltransferase domain-containing protein OS=Toxoplasma gondii (strain ATCC 50861 / VEG) GN=BN1205_106760 PE=4 SV=1	A0A0F7V612_TOXGV	57 kDa	0	0	0	0	1743800	0	891650
Uncharacterized protein OS=Toxoplasma gondii (strain ATCC 50861 / VEG) GN=BN1205_063400 PE=4 SV=1	B9Q6V9_TOXGV	70 kDa	0	0	0	0	0	0	1585000
26S proteasome regulatory particle non-ATPase subunit, putative OS=Toxoplasma gondii (strain ATCC 50861 / VEG) GN=BN1205_001250 PE=4 SV=1	A0A125YZ90_TOXGV	41 kDa	0	0	0	0	0	1586300	0
Putative alpha-glucan water dikinase 1 (Fragment) OS=Toxoplasma gondii (strain ATCC 50861 / VEG) GN=TGVEG_214260A PE=4 SV=1	V5B5U5_TOXGV	173 kDa	0	0	0	0	1176100	0	492470
DNA replication licensing factor, putative OS=Toxoplasma gondii (strain ATCC 50861 / VEG) GN=BN1205_070150 PE=3 SV=1	A0A125YPL0_TOXGV	112 kDa	0	0	0	0	3277400	410280	503090
DnaK family protein OS=Toxoplasma gondii (strain ATCC 50861 / VEG) GN=BN1205_070540 PE=3 SV=1	B9QLT2_TOXGV	90 kDa	0	0	0	0	0	1755200	1117500
Proteasome/cyclosome repeat-containing protein (Fragment) OS=Toxoplasma gondii (strain ATCC 50861 / VEG) GN=TGVEG_263060B PE=4 SV=1	V4YUM0_TOXGV	107 kDa	0	0	0	0	1886700	565950	0
Putative protease Do OS=Toxoplasma gondii (strain ATCC 50861 / VEG) GN=TGVEG_318290 PE=4 SV=1	V4YN39_TOXGV	74 kDa	0	0	0	0	2228700	0	717380
Uncharacterized protein OS=Toxoplasma gondii (strain ATCC 50861 / VEG) GN=TGVEG_228770 PE=4 SV=1	A0A125YWI3_TOXGV	59 kDa	0	0	0	0	633400	0	0
1,4-alpha-glucan branching enzyme, putative OS=Toxoplasma gondii (strain ATCC 50861 / VEG) GN=BN1205_101620 PE=4 SV=1	B6K9U3_TOXGV	110 kDa	0	0	0	0	1176300	724920	1214600
START domain protein OS=Toxoplasma gondii (strain ATCC 50861 / VEG) GN=TGVEG_228130 PE=4 SV=1	V4ZBS2_TOXGV	84 kDa	0	0	0	0	0	1053100	0
Phenylalanyl tRNA synthetase isoform, putative OS=Toxoplasma gondii (strain ATCC 50861 / VEG) GN=BN1205_062610 PE=4 SV=1	B9PWD9_TOXGV	59 kDa	0	0	0	0	0	0	384630
Putative ribosome biogenesis protein OS=Toxoplasma gondii (strain ATCC 50861 / VEG) GN=TGVEG_265110 PE=4 SV=1	V4ZN47_TOXGV	118 kDa	0	0	0	0	1461500	0	334240
Uncharacterized protein OS=Toxoplasma gondii (strain ATCC 50861 / VEG) GN=BN1205_057920 PE=4 SV=1	B9QJ77_TOXGV	225 kDa	0	0	0	0	0	0	1824200
Uncharacterized protein OS=Toxoplasma gondii (strain ATCC 50861 / VEG) GN=BN1205_027600 PE=4 SV=1	B9PS42_TOXGV	21 kDa	0	0	0	0	1542800	0	927990
Replication factor-a protein 1 (Rpa1) subfamily protein OS=Toxoplasma gondii (strain ATCC 50861 / VEG) GN=BN1205_061220 PE=4 SV=1	V4Z6E7_TOXGV	100 kDa	0	0	0	0	0	0	458880
Nucleoporin FG repeat region protein OS=Toxoplasma gondii (strain ATCC 50861 / VEG) GN=BN1205_108030 PE=4 SV=1	B6KRE5_TOXGV	67 kDa	0	0	0	0	3442100	0	0
Dihydrolipoamide succinyltransferase component of 2-oxoglutaratedehydrogenase complex, putative OS=Toxoplasma gondii (strain ATCC 50861 / VEG) GN=BN1205_070400 PE=4 SV=1	B9PQP0_TOXGV	50 kDa	0	0	0	0	0	0	2949900
Uncharacterized protein OS=Toxoplasma gondii (strain ATCC 50861 / VEG) GN=BN1205_003760 PE=4 SV=1	A0A125YVV7_TOXGV	93 kDa	0	0	0	0	3965300	0	1068300
Peptidyl-prolyl cis-trans isomerase OS=Toxoplasma gondii (strain ATCC 50861 / VEG) GN=BN1205_033140 PE=3 SV=1	B9PS61_TOXGV	23 kDa	0	0	0	0	0	0	2473500
Probable ATP-dependent 6-phosphofructokinase OS=Toxoplasma gondii (strain ATCC 50861 / VEG) GN=BN1205_090400 PE=3 SV=1	B6KFH7_TOXGV	155 kDa	0	0	0	0	0	486840	1919700
Fibrillarin OS=Toxoplasma gondii (strain ATCC 50861 / VEG) GN=BN1205_095540 PE=3 SV=1	B6K8L1_TOXGV	32 kDa	0	0	0	0	0	0	1129600
AP2 domain transcription factor AP2XII-1 OS=Toxoplasma gondii (strain ATCC 50861 / VEG) GN=BN1205_070880 PE=4 SV=1	B9PQJ9_TOXGV	248 kDa	0	0	0	0	1781800	0	0
Uncharacterized protein OS=Toxoplasma gondii (strain ATCC 50861 / VEG) GN=BN1205_053000 PE=4 SV=1	B9QHE3_TOXGV	42 kDa	0	0	0	0	3315700	0	0
Nuclear factor NF7 OS=Toxoplasma gondii (strain ATCC 50861 / VEG) GN=BN1205_002980 PE=4 SV=1	B9QD54_TOXGV	54 kDa	0	0	0	0	0	359980	948820
Ribosomal-ubiquitin protein RPL40 OS=Toxoplasma gondii (strain ATCC 50861 / VEG) GN=BN1205_083510 PE=4 SV=1	B9PTM6_TOXGV (+1)	15 kDa	0	0	0	0	0	0	6955100
TBC domain-containing protein OS=Toxoplasma gondii (strain ATCC 50861 / VEG) GN=BN1205_036470 PE=4 SV=1	B9QQE8_TOXGV	102 kDa	0	0	0	0	0	0	530050
Uncharacterized protein OS=Toxoplasma gondii (strain ATCC 50861 / VEG) GN=TGVEG_242435 PE=4 SV=1	V5B7D1_TOXGV	331 kDa	0	0	0	0	807180	0	0
Protein phosphatase 2C domain-containing protein OS=Toxoplasma gondii (strain ATCC 50861 / VEG) GN=BN1205_023300 PE=3 SV=1	B9Q4R2_TOXGV	60 kDa	0	0	0	0	1230100	212490	0
Peptidase family M3 domain containing protein OS=Toxoplasma gondii (strain ATCC 50861 / VEG) GN=BN1205_020200 PE=3 SV=1	B9Q3Z6_TOXGV	118 kDa	0	0	0	0	784050	0	0
3-ketoacyl-(Acyl-carrier-protein) reductase OS=Toxoplasma gondii (strain ATCC 50861 / VEG) GN=BN1205_006670 PE=4 SV=1	B6KU18_TOXGV	39 kDa	0	0	0	0	1931000	0	1053600
LETM1 domain-containing protein LETM2,mitochondrial OS=Toxoplasma gondii (strain ATCC 50861 / VEG) GN=BN1205_082170 PE=4 SV=1	V4Z0I9_TOXGV	120 kDa	0	0	0	0	1512200	0	0
Hypoxia-inducible factor prolyl hydroxylase (Phd2), putative OS=Toxoplasma gondii (strain ATCC 50861 / VEG) GN=BN1205_031260 PE=4 SV=1	V4ZB09_TOXGV	64 kDa	0	0	0	0	1638700	0	0
Protein phosphatase 2C domain-containing protein OS=Toxoplasma gondii (strain ATCC 50861 / VEG) GN=BN1205_071150 PE=4 SV=1	B9QLY3_TOXGV	98 kDa	0	0	0	0	0	272780	0
Uncharacterized protein OS=Toxoplasma gondii (strain ATCC 50861 / VEG) GN=BN1205_045230 PE=4 SV=1	V4ZLT7_TOXGV	201 kDa	0	0	0	0	1258200	0	998260
Uncharacterized protein OS=Toxoplasma gondii (strain ATCC 50861 / VEG) GN=BN1205_064210 PE=4 SV=1	V4YW62_TOXGV	169 kDa	0	0	0	0	0	391980	0
HEAT repeat-containing protein OS=Toxoplasma gondii (strain ATCC 50861 / VEG) GN=BN1205_084400 PE=4 SV=1	V4Z0S5_TOXGV	267 kDa	0	0	0	0	0	127930	0
Sec16 Sec23-binding domain protein OS=Toxoplasma gondii (strain ATCC 50861 / VEG) GN=BN1205_013130 PE=4 SV=1	B6KQW9_TOXGV	217 kDa	0	0	0	0	1708800	0	282800
Dense granule protein GRA4 OS=Toxoplasma gondii (strain ATCC 50861 / VEG) GN=BN1205_094860 PE=4 SV=1	A0A125YIA4_TOXGV	36 kDa	0	0	0	0	0	0	6459900
Putative transmembrane protein OS=Toxoplasma gondii (strain ATCC 50861 / VEG) GN=BN1205_036545 PE=4 SV=1	V4YSN2_TOXGV	31 kDa	0	0	0	0	1933900	0	934030
Putative transmembrane protein OS=Toxoplasma gondii (strain ATCC 50861 / VEG) GN=TGVEG_233470 PE=4 SV=1	A0A125YKH7_TOXGV	62 kDa	0	0	0	0	0	1229600	0
T-complex protein 1 eta subunit OS=Toxoplasma gondii (strain ATCC 50861 / VEG) GN=BN1205_054440 PE=3 SV=1	A0A125YFZ4_TOXGV	59 kDa	0	0	0	0	0	0	586700
Dense granule protein 1 / major antigenp24 OS=Toxoplasma gondii (strain ATCC 50861 / VEG) GN=BN1205_017550 PE=4 SV=1	B9Q5Z2_TOXGV	20 kDa	0	0	0	0	0	0	2061500
Rhoptry protein ROP1 OS=Toxoplasma gondii (strain ATCC 50861 / VEG) GN=BN1205_093730 PE=4 SV=1	B6KA38_TOXGV	48 kDa	0	0	0	0	0	1766900	2631500
Uncharacterized protein OS=Toxoplasma gondii (strain ATCC 50861 / VEG) GN=BN1205_075610 PE=4 SV=1	B6KBB5_TOXGV	33 kDa	0	0	0	0	0	0	752510
UMP-CMP kinase OS=Toxoplasma gondii (strain ATCC 50861 / VEG) GN=TGVEG_257740 PE=3 SV=1	A0A125YI07_TOXGV	51 kDa	0	0	0	0	0	643030	207010
S1 RNA binding domain-containing protein OS=Toxoplasma gondii (strain ATCC 50861 / VEG) GN=BN1205_009410 PE=4 SV=1	B9PVI9_TOXGV	42 kDa	0	0	0	0	1915900	0	0
Proteasome endopeptidase complex OS=Toxoplasma gondii (strain ATCC 50861 / VEG) GN=BN1205_028775 PE=3 SV=1	A0A125YIQ4_TOXGV	27 kDa	0	0	0	0	0	717260	1563500
Leucine carboxyl methyltransferase OS=Toxoplasma gondii (strain ATCC 50861 / VEG) GN=BN1205_059680 PE=4 SV=1	B9Q799_TOXGV	50 kDa	0	0	0	0	972380	0	1048500
CRAL/TRIO domain protein OS=Toxoplasma gondii (strain ATCC 50861 / VEG) GN=TGVEG_213790 PE=4 SV=1	V4Z5Y4_TOXGV	192 kDa	0	0	0	0	0	0	697250
Tubulin gamma chain OS=Toxoplasma gondii (strain ATCC 50861 / VEG) GN=BN1205_067890 PE=3 SV=1	A0A125YV55_TOXGV	52 kDa	0	0	0	0	0	584860	708800
TPR domain-containing protein OS=Toxoplasma gondii (strain ATCC 50861 / VEG) GN=BN1205_025910 PE=4 SV=1	B9Q5V3_TOXGV	91 kDa	0	0	0	0	0	0	699720
RNA recognition motif 2 domain-containing protein OS=Toxoplasma gondii (strain ATCC 50861 / VEG) GN=BN1205_098960 PE=4 SV=1	A0A125YGV3_TOXGV	100 kDa	0	0	0	0	1730700	0	0
Nuclease and tudor domain-containing protein OS=Toxoplasma gondii (strain ATCC 50861 / VEG) GN=BN1205_035920 PE=4 SV=1	B9PNS2_TOXGV	104 kDa	0	0	0	0	875270	0	815560
DnaJ domain-containing protein OS=Toxoplasma gondii (strain ATCC 50861 / VEG) GN=BN1205_044750 PE=4 SV=1	V4ZD10_TOXGV	72 kDa	0	0	0	0	0	0	697860
AP2 domain transcription factor AP2XI-2 OS=Toxoplasma gondii (strain ATCC 50861 / VEG) GN=BN1205_095000 PE=4 SV=1	B6KAF6_TOXGV	233 kDa	0	0	0	0	1058200	0	0
Putative transmembrane protein OS=Toxoplasma gondii (strain ATCC 50861 / VEG) GN=BN1205_091980 PE=4 SV=1	B6KF69_TOXGV	66 kDa	0	0	0	0	4473600	0	0
26S proteasome non-ATPase regulatory subunit,putative OS=Toxoplasma gondii (strain ATCC 50861 / VEG) GN=BN1205_073380 PE=4 SV=1	B9PKI5_TOXGV	55 kDa	0	0	0	0	0	0	1690900
Protein FAM98A OS=Toxoplasma gondii (strain ATCC 50861 / VEG) GN=BN1205_014670 PE=4 SV=1	A0A125YK93_TOXGV	50 kDa	0	0	0	0	1612700	0	859150
Dipeptidyl peptidase iv (Dpp iv) n-terminal region domain-containing protein OS=Toxoplasma gondii (strain ATCC 50861 / VEG) GN=TGVEG_245500 PE=4 SV=1	V5BFD3_TOXGV	206 kDa	0	0	0	0	2279700	0	0
Uncharacterized protein OS=Toxoplasma gondii (strain ATCC 50861 / VEG) GN=BN1205_057060 PE=4 SV=1	B9QJ03_TOXGV	139 kDa	0	0	0	0	0	0	1554200
Uncharacterized protein OS=Toxoplasma gondii (strain ATCC 50861 / VEG) GN=BN1205_074620 PE=4 SV=1	A0A0F7V2T4_TOXGV	18 kDa	0	0	0	0	0	356450	0
Glucose-6-phosphate 1-dehydrogenase OS=Toxoplasma gondii (strain ATCC 50861 / VEG) GN=BN1205_013670 PE=3 SV=1	A0A0F7USN9_TOXGV	63 kDa	0	0	0	0	0	0	924140
Pyruvate carboxylase OS=Toxoplasma gondii (strain ATCC 50861 / VEG) GN=BN1205_032410 PE=4 SV=1	V4YQK1_TOXGV	152 kDa	0	0	0	0	803280	0	127430
DNA-directed RNA polymerase I RPAC1 OS=Toxoplasma gondii (strain ATCC 50861 / VEG) GN=BN1205_108810 PE=4 SV=1	B6KLD3_TOXGV	38 kDa	0	0	0	0	1710500	0	558310
Uncharacterized protein OS=Toxoplasma gondii (strain ATCC 50861 / VEG) GN=BN1205_070500 PE=4 SV=1	V4Z8X8_TOXGV	181 kDa	0	0	0	0	0	0	1926100
DNA-directed RNA polymerase I RPAC2 OS=Toxoplasma gondii (strain ATCC 50861 / VEG) GN=BN1205_073170 PE=4 SV=1	B9PKF9_TOXGV	14 kDa	0	0	0	0	1388500	0	0
U3 small nucleolar ribonucleoprotein complex-associated protein, putative OS=Toxoplasma gondii (strain ATCC 50861 / VEG) GN=BN1205_047710 PE=4 SV=1	B9PUT6_TOXGV	60 kDa	0	0	0	0	341070	0	0
Ankyrin repeat-containing protein OS=Toxoplasma gondii (strain ATCC 50861 / VEG) GN=TGVEG_254660 PE=4 SV=1	A0A125YPT2_TOXGV	32 kDa	0	0	0	0	0	0	983230
Actin like protein ALP2a OS=Toxoplasma gondii (strain ATCC 50861 / VEG) GN=BN1205_076500 PE=3 SV=1	B6KB45_TOXGV	60 kDa	0	0	0	0	0	0	1046200
Cell division protein, putative OS=Toxoplasma gondii (strain ATCC 50861 / VEG) GN=BN1205_074980 PE=4 SV=1	A0A0F7UWQ2_TOXGV	137 kDa	0	0	0	0	0	0	890970
Uncharacterized protein OS=Toxoplasma gondii (strain ATCC 50861 / VEG) GN=TGVEG_207370 PE=4 SV=1	V4ZAA1_TOXGV	143 kDa	0	0	0	0	2133900	0	0
Methyltransferase domain containing protein OS=Toxoplasma gondii (strain ATCC 50861 / VEG) GN=BN1205_034570 PE=4 SV=1	B9QGC8_TOXGV	92 kDa	0	0	0	0	0	0	635240
Putative RSC6/BAF60A-like with A SWIB domain, related protein OS=Toxoplasma gondii (strain ATCC 50861 / VEG) GN=BN1205_003770 PE=4 SV=1	A0A125YTM0_TOXGV	101 kDa	0	0	0	0	0	482800	0
Glutaminyl-tRNA synthetase (GlnRS) OS=Toxoplasma gondii (strain ATCC 50861 / VEG) GN=BN1205_007070 PE=1 SV=1	B6KTZ0_TOXGV	96 kDa	0	0	0	0	2436100	0	556930
26S proteasome regulatory subunit, putative OS=Toxoplasma gondii (strain ATCC 50861 / VEG) GN=BN1205_016350 PE=4 SV=1	B9PHD3_TOXGV	38 kDa	0	0	0	0	0	0	1364900
PCI domain-containing protein OS=Toxoplasma gondii (strain ATCC 50861 / VEG) GN=BN1205_040520 PE=4 SV=1	B6KP08_TOXGV	55 kDa	0	0	0	0	0	0	410160
Acyltransferase domain containing protein OS=Toxoplasma gondii (strain ATCC 50861 / VEG) GN=BN1205_064380 PE=4 SV=1	B9PM03_TOXGV	44 kDa	0	0	0	0	2149100	0	0
Leucyl-tRNA synthetase OS=Toxoplasma gondii (strain ATCC 50861 / VEG) GN=TGVEG_292080 PE=3 SV=1	V4ZJI5_TOXGV	141 kDa	0	0	0	0	1392500	0	0
ATPase, AFG1 family domain-containing protein OS=Toxoplasma gondii (strain ATCC 50861 / VEG) GN=BN1205_037160 PE=4 SV=1	B6KSV5_TOXGV	80 kDa	0	0	0	0	0	404090	0
Phenylalanine--tRNA ligase, beta subunit protein OS=Toxoplasma gondii (strain ATCC 50861 / VEG) GN=BN1205_050870 PE=4 SV=1	A0A125YXZ8_TOXGV	75 kDa	0	0	0	0	0	0	670470
Duplicated carbonic anhydrase OS=Toxoplasma gondii (strain ATCC 50861 / VEG) GN=BN1205_053880 PE=4 SV=1	B9Q161_TOXGV	58 kDa	0	0	0	0	0	0	455400
Glycerol-3-phosphate acyltransferase, putative OS=Toxoplasma gondii (strain ATCC 50861 / VEG) GN=BN1205_077480 PE=4 SV=1	B6KAW1_TOXGV	110 kDa	0	0	0	0	1601200	0	0
Histone arginine methyltransferase PRMT3 OS=Toxoplasma gondii (strain ATCC 50861 / VEG) GN=BN1205_056120 PE=3 SV=1	B9QIS1_TOXGV	88 kDa	0	0	0	0	0	0	1170500
Adaptin n terminal region domain-containing protein OS=Toxoplasma gondii (strain ATCC 50861 / VEG) GN=BN1205_093510 PE=4 SV=1	B6KA26_TOXGV	144 kDa	0	0	0	0	370400	0	517380
GYF domain protein OS=Toxoplasma gondii (strain ATCC 50861 / VEG) GN=BN1205_100830 PE=4 SV=1	B6K9M4_TOXGV	88 kDa	0	0	0	0	0	444320	0
Putative septum formation protein maf OS=Toxoplasma gondii (strain ATCC 50861 / VEG) GN=TGVEG_301430 PE=4 SV=1	B9QPZ7_TOXGV	42 kDa	0	0	0	0	1332000	0	0
Hydrolase alpha/beta fold protein OS=Toxoplasma gondii (strain ATCC 50861 / VEG) GN=BN1205_096770 PE=4 SV=1	A0A125YFA8_TOXGV	66 kDa	0	0	0	0	0	0	617750
Trehalose-6-phosphate synthase domain-containing protein OS=Toxoplasma gondii (strain ATCC 50861 / VEG) GN=BN1205_054550 PE=4 SV=1	B9QHQ6_TOXGV	137 kDa	0	0	0	0	1637500	0	0
Phosphoserine phosphatase OS=Toxoplasma gondii (strain ATCC 50861 / VEG) GN=TGVEG_222900 PE=4 SV=1	V5B2B4_TOXGV	191 kDa	0	0	0	0	0	0	341100
Superoxide dismutase OS=Toxoplasma gondii (strain ATCC 50861 / VEG) GN=BN1205_101410 PE=3 SV=1	A0A0F7V5R2_TOXGV	23 kDa	0	0	0	0	0	0	2315400
Carrier superfamily protein OS=Toxoplasma gondii (strain ATCC 50861 / VEG) GN=TGVEG_208560 PE=3 SV=1	A0A125YSE2_TOXGV	72 kDa	0	0	0	0	1577100	0	0
Putative transmembrane protein OS=Toxoplasma gondii (strain ATCC 50861 / VEG) GN=TGVEG_243390 PE=4 SV=1	A0A125YMF9_TOXGV	37 kDa	0	0	0	0	0	869520	0
AP2 domain transcription factor AP2X-8 OS=Toxoplasma gondii (strain ATCC 50861 / VEG) GN=BN1205_030930 PE=4 SV=1	B9QN68_TOXGV	399 kDa	0	0	0	0	0	0	894010
Multi-pass transmembrane protein OS=Toxoplasma gondii (strain ATCC 50861 / VEG) GN=BN1205_070580 PE=4 SV=1	B9PQM0_TOXGV	43 kDa	0	0	0	0	0	1618600	0
Uncharacterized protein OS=Toxoplasma gondii (strain ATCC 50861 / VEG) GN=BN1205_047245 PE=4 SV=1	A0A125YZF9_TOXGV	87 kDa	0	0	0	0	1460200	0	0
Coatomer subunit beta OS=Toxoplasma gondii (strain ATCC 50861 / VEG) GN=BN1205_085900 PE=4 SV=1	B9QPA4_TOXGV	122 kDa	0	0	0	0	0	0	391820
Transcription elongation factor FACT 140 kDa,putative OS=Toxoplasma gondii (strain ATCC 50861 / VEG) GN=BN1205_052330 PE=4 SV=1	A0A125YHC5_TOXGV	135 kDa	0	0	0	0	0	0	536280
RNA binding motif-containing protein OS=Toxoplasma gondii (strain ATCC 50861 / VEG) GN=BN1205_080800 PE=4 SV=1	B9Q1D4_TOXGV	51 kDa	0	0	0	0	662970	0	0
TPR domain containing protein OS=Toxoplasma gondii (strain ATCC 50861 / VEG) GN=BN1205_109340 PE=4 SV=1	B9QP59_TOXGV	39 kDa	0	0	0	0	1974600	0	0
Uncharacterized protein OS=Toxoplasma gondii (strain ATCC 50861 / VEG) GN=BN1205_021130 PE=4 SV=1	A0A0F7UXY9_TOXGV	74 kDa	0	0	0	0	0	0	277080
Phosphodiesterase OS=Toxoplasma gondii (strain ATCC 50861 / VEG) GN=TGVEG_257080 PE=3 SV=1	A0A125YJK4_TOXGV	180 kDa	0	0	0	0	233220	0	0
CPSF A subunit region protein OS=Toxoplasma gondii (strain ATCC 50861 / VEG) GN=TGVEG_267710 PE=4 SV=1	V5BDD5_TOXGV	224 kDa	0	0	0	0	0	0	468170
Uncharacterized protein OS=Toxoplasma gondii (strain ATCC 50861 / VEG) GN=BN1205_006830 PE=4 SV=1	A0A125YWF7_TOXGV	246 kDa	0	0	0	0	0	0	273940
Adaptor complexes medium subunit family protein OS=Toxoplasma gondii (strain ATCC 50861 / VEG) GN=TGVEG_221522 PE=3 SV=1	V4YPF1_TOXGV	61 kDa	0	0	0	0	0	0	356990
Coatomer epsilon subunit protein OS=Toxoplasma gondii (strain ATCC 50861 / VEG) GN=BN1205_104190 PE=4 SV=1	B9QJQ8_TOXGV	34 kDa	0	0	0	0	373460	0	0
26S proteasome regulatory ATPase subunit,putative OS=Toxoplasma gondii (strain ATCC 50861 / VEG) GN=BN1205_068990 PE=3 SV=1	B9PN40_TOXGV	44 kDa	0	0	0	0	0	652900	0
Microneme protein MIC5 OS=Toxoplasma gondii (strain ATCC 50861 / VEG) GN=TGVEG_277080 PE=4 SV=1	A0A125YHB4_TOXGV	20 kDa	0	0	0	0	0	0	381340
Putative transmembrane protein OS=Toxoplasma gondii (strain ATCC 50861 / VEG) GN=BN1205_060200 PE=4 SV=1	B9Q6H9_TOXGV	29 kDa	0	0	0	0	0	0	479970
Zinc finger (CCCH type) motif-containing protein OS=Toxoplasma gondii (strain ATCC 50861 / VEG) GN=TGVEG_202900 PE=4 SV=1	V4ZCD1_TOXGV	137 kDa	0	0	0	0	2137300	0	0
MIF4G domain-containing protein OS=Toxoplasma gondii (strain ATCC 50861 / VEG) GN=BN1205_016290 PE=4 SV=1	B9Q5H6_TOXGV	273 kDa	0	0	0	0	0	0	768640
Myosin heavy chain, putative OS=Toxoplasma gondii (strain ATCC 50861 / VEG) GN=BN1205_101630 PE=4 SV=1	B6K9U4_TOXGV	93 kDa	0	0	0	0	0	0	330580
Methyltransferase domain-containing protein OS=Toxoplasma gondii (strain ATCC 50861 / VEG) GN=BN1205_013020 PE=4 SV=1	B9PYE5_TOXGV	83 kDa	0	0	0	0	317330	0	0
Phosphoglycerate mutase family protein OS=Toxoplasma gondii (strain ATCC 50861 / VEG) GN=TGVEG_276210 PE=4 SV=1	V4Z8A0_TOXGV	92 kDa	0	0	0	0	923110	0	0
Uncharacterized protein OS=Toxoplasma gondii (strain ATCC 50861 / VEG) GN=BN1205_062110 PE=4 SV=1	V4YRJ7_TOXGV	168 kDa	0	0	0	0	0	0	109220
Putative RNA helicase-1 OS=Toxoplasma gondii (strain ATCC 50861 / VEG) GN=BN1205_105920 PE=4 SV=1	B6KVH6_TOXGV	52 kDa	0	0	0	0	3509800	0	0
General transcription factor IIH polypeptide 2 GTF2H2 OS=Toxoplasma gondii (strain ATCC 50861 / VEG) GN=BN1205_012910 PE=4 SV=1	A0A125YUQ1_TOXGV	52 kDa	0	0	0	0	0	0	819550
Version: 1.6.0.1
Samples: All Samples
Fragment Tolerance: 0.50 Da (Monoisotopic)
Parent Tolerance: Unknown
Fixed Modifications: +57 on C (Carbamidomethyl)
Variable Modifications: +16 on M (Oxidation), +42 on n (Acetyl)
Database: the uniprot_Toxoplasma gondii database (unknown version, 0 entries)
Digestion Enzyme: stricttrypsin
Max Missed Cleavages: 2
Probability Model:
	Experiment MD009:Tom40_1 from Tom40_1 +1 others: Peptide Prophet with Delta Mass Correction (No decoys found) [all charge states]
	Experiment MD009:Tom40_2 from Tom40_2 +1 others: Peptide Prophet with Delta Mass Correction (No decoys found) [all charge states]
	Experiment MD009:Tom40_3 from Tom40_3 +1 others: Peptide Prophet with Delta Mass Correction (No decoys found) [all charge states]
	Experiment MD009:ApiCox25_1 from ApiCox25_1 +1 others: Peptide Prophet with Delta Mass Correction (No decoys found) [all charge states]
	Experiment MD009:ApiCox25_2 from ApiCox25_2 +1 others: Peptide Prophet with Delta Mass Correction (No decoys found) [all charge states]
	Experiment MD009:ApiCox25_3 from ApiCox25_3 +1 others: Peptide Prophet with Delta Mass Correction (No decoys found) [all charge states]
Source: C:\Program Files\Scaffold 4\parameters\unimod.xml
Comment:

## Sheet: logFC and P values
Accession number	logFC	p value
A0A125YGW3_TOXGV	10.256	4.83815e-154
A0A125YY22_TOXGV	10.1489	9.07698e-45
B9PYL9_TOXGV	9.70429	4.40109e-140
V4Z393_TOXGV	9.05346	1.23688e-134
B6KJ93_TOXGV	8.98767	9.67352e-46
B9QNT6_TOXGV	8.74986	7.3786e-131
B6KPB2_TOXGV	8.49125	5.14035e-146
B9PLQ5_TOXGV	8.5161	1.92082e-136
A0A0F7V207_TOXGV	8.49172	2.55708e-31
B9PSC6_TOXGV	8.10875	9.98053e-22
A0A0F7V9B5_TOXGV	8.11812	1.64545e-25
B6KH21_TOXGV	7.85458	1.08991e-68
V4YUF5_TOXGV	3.7313	7.28069e-12
V4Z729_TOXGV	4.02889	1.20874e-17
A0A0F7UTU3_TOXGV	2.59014	4.49643e-09
B9Q5A1_TOXGV	2.53171	6.45218e-08
A0A125YTK1_TOXGV	2.40926	1.76484e-13
A0A0F7VC17_TOXGV	1.85132	0.00152072
B9PQU8_TOXGV	1.89738	1.50371e-11
B9PJK1_TOXGV	1.76354	0.00102625
A0A125YYW0_TOXGV	1.88782	1.79198e-05
A0A125YTH1_TOXGV	1.60603	8.4788e-05
B9PUJ6_TOXGV	1.5765	1.06794e-07
B6K9I7_TOXGV	1.53534	7.37566e-05
B9PK53_TOXGV	1.7841	8.32121e-05
B9Q788_TOXGV	1.4027	7.21909e-09
B9PKF7_TOXGV	1.40442	1.68078e-07
B9PIY5_TOXGV	1.47144	4.10044e-08
B6KGK3_TOXGV	1.19155	0.000761369
B9PHL8_TOXGV	1.21463	0.000133507
B9PGL1_TOXGV	1.32702	2.71146e-05
A0A125YJX3_TOXGV	1.33049	0.000933444
A0A0F7UMP6_TOXGV	1.20279	0.0190625
B9QNT7_TOXGV	1.08668	0.000173216
B9PX63_TOXGV	1.10956	1.26762e-05
B9PGV5_TOXGV	1.20063	2.62064e-06
B9PXE4_TOXGV	1.18048	0.000858171
B9PN38_TOXGV	1.07232	0.0136795
A0A125YSG6_TOXGV	1.07278	0.0136155
B9PU56_TOXGV	1.05175	0.0579329
A0A0F7V9A2_TOXGV	1.1473	0.0177555
B9PP21_TOXGV	1.10613	0.00297767
B6KLD4_TOXGV	1.14872	0.00715544
B9PTP1_TOXGV	1.07999	0.0109676
V4Z6U4_TOXGV	0.83292	0.0132553
B9PPQ1_TOXGV	0.951129	3.715e-05
V4ZJ48_TOXGV	1.01488	0.000237732
A0A0F7VB49_TOXGV	0.957919	0.000163621
B6KB88_TOXGV	0.913059	0.00660805
B9QDS4_TOXGV	0.909465	0.00918236
B9PKQ4_TOXGV	0.810212	0.0237481
A0A125YXW4_TOXGV	0.80487	0.0430292
B9PZF2_TOXGV	1.07185	0.0133971
B9PV52_TOXGV	0.898491	0.0482022
A0A0F7UUN0_TOXGV	0.871111	0.0108794
B6KC70_TOXGV	0.831147	0.0447036
V4ZBR1_TOXGV	0.79838	0.00165703
A0A125YJ41_TOXGV	0.457189	0.0670822
B6KJK9_TOXGV	0.692113	0.011044
A0A125YTY5_TOXGV	0.41729	0.257437
A0A0F7VDV9_TOXGV	0.58546	0.0415884
A0A125YYX1_TOXGV	0.708629	0.0107687
B6KL08_TOXGV	0.643615	0.140059
B9PRE4_TOXGV	0.473342	0.325981
B9QN70_TOXGV	0.663877	0.046872
A0A0F7V1A1_TOXGV	0.673254	0.0458124
B6KFE8_TOXGV	0.480527	0.146943
V4YUS0_TOXGV	0.599587	0.0954165
B9PGG2_TOXGV	0.536437	0.0844588
B9PLQ2_TOXGV	0.502087	0.0980224
B9PZT4_TOXGV	0.646397	0.024222
B6KT44_TOXGV	0.650591	0.0760647
A0A125YKH1_TOXGV	0.758283	0.0176108
A0A125YZB5_TOXGV	0.815499	0.0822473
B9PMX8_TOXGV	0.489249	0.166982
V4Z6R8_TOXGV	0.448594	0.206417
B9QJS4_TOXGV	0.386705	0.0860471
B9PZU5_TOXGV	0.352441	0.14413
A0A0F7UVN4_TOXGV	0.491723	0.0316939
B6KJS2_TOXGV	0.23529	0.432127
B6KJD3_TOXGV	0.234935	0.299551
B9Q7I4_TOXGV	0.218351	0.440637
B9PH44_TOXGV (+1)	0.15071	0.543723
B9QPX7_TOXGV	0.145017	0.537106
B6KHU4_TOXGV	0.300228	0.352314
A0A125YV32_TOXGV	0.459775	0.105418
B9PZR3_TOXGV	0.187558	0.508908
V4YRR7_TOXGV	0.207362	0.461113
B9PXJ3_TOXGV	0.324188	0.340584
A0A125YKU7_TOXGV	0.228664	0.370228
V4YRT0_TOXGV	0.331109	0.142791
A0A0F7VAX6_TOXGV	0.475461	0.0562935
B9Q1T8_TOXGV	0.156365	0.560258
A0A0F7UNS7_TOXGV	0.282068	0.442954
V4YYL6_TOXGV	0.257762	0.411232
B9Q836_TOXGV	0.335816	0.264443
A0A125YTU4_TOXGV	0.436517	0.178171
B9Q1K1_TOXGV	0.444637	0.176892
B9QIT1_TOXGV	0.376774	0.108594
A0A0F7UZH2_TOXGV	0.458261	0.151291
B9Q1A8_TOXGV	0.176957	0.600914
A0A125YTI3_TOXGV	0.300239	0.427321
B6KB46_TOXGV	0.633943	0.154437
A0A125YU31_TOXGV	0.167854	0.646705
B9QGY1_TOXGV	0.137504	0.674771
V4Z117_TOXGV	0.309594	0.431978
B9PT01_TOXGV	0.329035	0.272228
A0A0F7UNF9_TOXGV	0.408068	0.193396
B6KFH2_TOXGV	0.393039	0.372143
V4Z6U8_TOXGV	0.469672	0.143536
B6KV50_TOXGV	0.239987	0.597405
A0A125YMR9_TOXGV	0.55402	0.0965046
A0A0F7V6G5_TOXGV	0.287468	0.578584
B9PTW2_TOXGV	0.325417	0.424607
B9PRA3_TOXGV	0.440981	0.282175
B9Q7A8_TOXGV	0.0882995	0.860014
B9QE54_TOXGV	0.156711	0.720706
B9Q1A7_TOXGV	0.488061	0.166922
A0A0F7V824_TOXGV	-0.27811	0.23931
A0A0F7V4M1_TOXGV	-0.0709218	0.73722
A0A0F7US18_TOXGV	0.0222765	0.926839
B9PH46_TOXGV	-0.252064	0.278251
B9QQB8_TOXGV	-0.222942	0.339103
V5BCJ1_TOXGV	0.0385918	0.870705
B9PFX5_TOXGV	-0.352527	0.161265
A0A125YZ67_TOXGV	-0.273555	0.394125
B6KID3_TOXGV	-0.0637948	0.815149
B6KC84_TOXGV	-0.365556	0.148981
B9Q5A3_TOXGV	-0.087746	0.730103
B9QG39_TOXGV	-0.20235	0.463796
B9PNL1_TOXGV	-0.036101	0.88658
V4YND8_TOXGV	-0.269372	0.654414
A0A0F7V4Z6_TOXGV	0.0596404	0.800133
A0A125YPC3_TOXGV	-0.149638	0.578988
B6KVA2_TOXGV	-0.108846	0.712784
B9PMM2_TOXGV	-0.18866	0.485095
V5B6B7_TOXGV	-0.224614	0.378092
AMA1_TOXGV	0.045994	0.89151
V4Z6Z1_TOXGV	0.011713	0.971212
A0A0F7V1V9_TOXGV	-0.255636	0.33632
A0A0F7V5E7_TOXGV	-0.0891113	0.798288
B6KM84_TOXGV	-0.133799	0.726301
A0A125YJY9_TOXGV	-0.21337	0.602894
B6KJQ6_TOXGV	-0.297146	0.30892
B9PLQ7_TOXGV	-0.0901594	0.809146
B9PMB3_TOXGV	0.0505641	0.873225
B9PZY8_TOXGV	-0.150047	0.5956
B9QE96_TOXGV	0.11878	0.796982
A0A0F7VFL4_TOXGV	-0.243491	0.5639
B9PZL6_TOXGV	-0.0528963	0.943065
B9PPE8_TOXGV	0.132438	0.75923
B6KJD0_TOXGV	-0.293491	0.402302
A0A125YYN8_TOXGV	-0.0663449	0.863725
A0A0F7VES8_TOXGV	-0.0434817	0.899587
A0A0F7V741_TOXGV	-0.0430909	0.92899
B9PVR5_TOXGV	-0.296175	0.323249
B9Q341_TOXGV	-0.212685	0.581117
B9Q056_TOXGV	-0.184577	0.610104
B9QC91_TOXGV	-0.209682	0.647064
B9PNK6_TOXGV	-0.234326	0.734202
A0A125YTX9_TOXGV	-0.327785	0.423514
B9PYX4_TOXGV	0.0992928	0.799416
B9PR43_TOXGV	-0.339504	0.558095
B6KEJ0_TOXGV	0.00959138	0.971855
A0A125YMU1_TOXGV	-0.0809953	0.846756
B9QHU4_TOXGV	-0.141121	0.745062
B9QE60_TOXGV	0.0732663	0.897816
B6KEE2_TOXGV	0.0846562	0.840297
B9PIN1_TOXGV	-0.256689	0.613584
B9QBW5_TOXGV	-0.154989	0.731871
B9Q857_TOXGV	-0.588678	0.0129236
A0A0F7V8D8_TOXGV	-0.393743	0.0762699
B6KBG5_TOXGV	-0.789493	0.000732769
A0A125YYG1_TOXGV	-0.718318	0.00692278
V4ZB36_TOXGV	-0.858122	0.000621006
V4Z6M2_TOXGV	-0.563851	0.0359338
A0A125YJI5_TOXGV	-0.796868	0.0496029
V4YI32_TOXGV	-1.11808	8.1542e-07
V5BD66_TOXGV	-0.821726	0.00207891
A0A125YJH2_TOXGV	-0.827204	0.000442486
B6KA42_TOXGV	-0.987968	0.000248393
B9PUT9_TOXGV	-0.942672	0.00125916
A0A0F7V4K0_TOXGV	-0.631389	0.0697948
B9PRA8_TOXGV	-0.537145	0.0620153
V5BD96_TOXGV	-0.695952	0.0137916
A0A125YST2_TOXGV	-0.752719	0.00373884
B6KKZ3_TOXGV	-0.575336	0.0544277
B9Q3G7_TOXGV	-1.08274	5.88255e-05
B9Q0N7_TOXGV	-1.13001	7.29197e-05
B9PGP4_TOXGV	-0.397504	0.240358
B9PZH8_TOXGV	-0.681965	0.00322216
A0A0F7V6Y1_TOXGV	-0.99113	0.0081415
A0A0F7UU04_TOXGV	-0.679667	0.146851
A0A125YSX9_TOXGV	-0.6593	0.125007
B9QP11_TOXGV	-0.696899	0.0845466
B9QI15_TOXGV	-1.02266	0.00145317
B9PKR3_TOXGV	-0.771502	0.011178
B9PQ71_TOXGV	-0.377263	0.144004
B9PQR4_TOXGV	-0.439779	0.206475
B6KB69_TOXGV	-0.368974	0.179103
A0A0F7V090_TOXGV	-0.623226	0.0713371
B9PWN3_TOXGV	-0.520896	0.222504
A0A125YV47_TOXGV	-1.05488	3.01108e-05
B6KDT4_TOXGV	-0.6706	0.13395
B9PJD4_TOXGV	-0.336457	0.424245
V4YUS8_TOXGV	-0.520786	0.139742
B6KM09_TOXGV	-0.906655	0.00584332
B9PMF9_TOXGV	-0.745773	0.0134052
B9PZD4_TOXGV	-0.663853	0.142454
B9QDU2_TOXGV	-0.440798	0.245484
A0A0F7UU07_TOXGV	-0.413905	0.197259
V4ZKE2_TOXGV	-0.976314	0.00926985
B9PYY9_TOXGV	-0.877472	0.00443372
A0A125YXF0_TOXGV	-0.777833	0.0666779
B9QN06_TOXGV	-0.331097	0.45695
B9PTM0_TOXGV	-0.829681	0.10434
B9PS36_TOXGV	-1.04799	0.00144022
B6KNZ3_TOXGV	-0.641777	0.0913135
B9PP22_TOXGV	-0.885815	0.00916989
B9PT75_TOXGV	-0.717632	0.0327692
A0A125YY58_TOXGV	-0.441373	0.374196
B9Q0L6_TOXGV	-0.637846	0.092198
B9Q2W7_TOXGV	-0.971059	0.0145439
V4Z362_TOXGV	-0.945208	4.04105e-05
B9PUT7_TOXGV	-0.460098	0.0664261
V4YX16_TOXGV	-0.466372	0.164495
B9PYW7_TOXGV	-0.604728	0.100856
B9PMH7_TOXGV	-0.740709	0.0644175
B9Q6Y6_TOXGV	-1.1262	0.00511986
B9PLM3_TOXGV	-0.499974	0.132835
B9PLT1_TOXGV	-0.729107	0.0365543
A0A125YFB9_TOXGV	-0.624045	0.0865927
A0A125YGR1_TOXGV	-0.45018	0.320001
V5BMS8_TOXGV	-0.766851	0.0693356
B9PPK8_TOXGV	-0.656773	0.0628885
V4Z7B3_TOXGV	-0.798135	0.0020528
V4YUG0_TOXGV	-0.432574	0.35191
V4ZC85_TOXGV	-0.726708	0.221528
A0A125YIF0_TOXGV	-1.03638	0.60458
B9Q6B5_TOXGV	-0.551081	0.0987907
V4ZPP0_TOXGV	-1.07905	0.00399581
B9Q0Q9_TOXGV	-0.875228	0.120518
B9PMU7_TOXGV	-0.328084	0.404059
V5AWC8_TOXGV	-1.19343	2.26063e-05
B9PYA4_TOXGV	-1.30248	1.87137e-05
A0A125YKM7_TOXGV	-1.32227	1.97626e-07
B9QGQ8_TOXGV	-1.40207	6.42506e-09
B9PJM1_TOXGV	-1.32244	1.9428e-07
B9QDZ9_TOXGV	-1.15472	0.000768538
A0A0F7V1Z5_TOXGV	-1.54419	9.34092e-06
B6KDN0_TOXGV	-1.1061	0.0156771
B6KHR8_TOXGV	-1.50996	7.34085e-10
A0A0F7UY31_TOXGV	-1.25095	4.8227e-05
B6KKZ7_TOXGV	-1.18728	0.000760704
V4Z2X0_TOXGV	-1.4802	1.66259e-05
A0A125YVF2_TOXGV	-1.69332	0.000265432
V5B269_TOXGV	-1.40257	0.000474372
B9QER9_TOXGV	-1.37925	0.00167274
A0A125YX76_TOXGV	-1.28361	0.00970531
A0A0F7UNF6_TOXGV	-1.17527	0.010397
V4ZCI9_TOXGV	-1.5248	8.34646e-05
B9PID4_TOXGV	-1.15503	0.00210413
V4YSG2_TOXGV	-1.87164	0.375995
B9PW44_TOXGV	-1.44992	0.000591443
V4YR89_TOXGV	-1.26045	0.00123831
B9Q2S1_TOXGV	-1.69591	0.000366469
V4YW47_TOXGV	-1.60188	7.37316e-05
B9QH40_TOXGV	-1.34485	0.000733211
B9PTE8_TOXGV	-1.49215	0.0021709
B9PRN1_TOXGV	-1.06985	0.0149369
A0A0F7UZ13_TOXGV	-1.62078	0.00918655
V4Z074_TOXGV	-1.78921	2.68905e-05
V4Z2D9_TOXGV	-1.82473	0.00079753
A0A0F7UTC9_TOXGV	-1.97883	7.55134e-16
B9Q5R8_TOXGV	-1.83939	6.23984e-06
B9QG70_TOXGV	-2.15147	5.06752e-08
A0A125YG06_TOXGV	-1.93286	1.39008e-08
A0A125YMN2_TOXGV	-1.83439	0.000312274
A0A125YVQ8_TOXGV	-1.98654	0.000801512
B6KVV5_TOXGV	-2.08481	1.69461e-05
A0A0F7V600_TOXGV	-2.37676	0.0086789
A0A0F7V4E5_TOXGV	-2.49015	1.02819e-07
A0A125YZ49_TOXGV	-2.75132	3.77268e-14
B9PFU8_TOXGV	-3.0044	1.04587e-09
A0A125YZM5_TOXGV	-3.70869	1.73066e-19
