# Supplementary figures and images for: Elucidating the mitochondrial proteome of Toxoplasma gondii reveals the presence of a divergent cytochrome c oxidase
Source: eLife journal article supplement (doi:10.7554/elife.38131), 2018-09-11

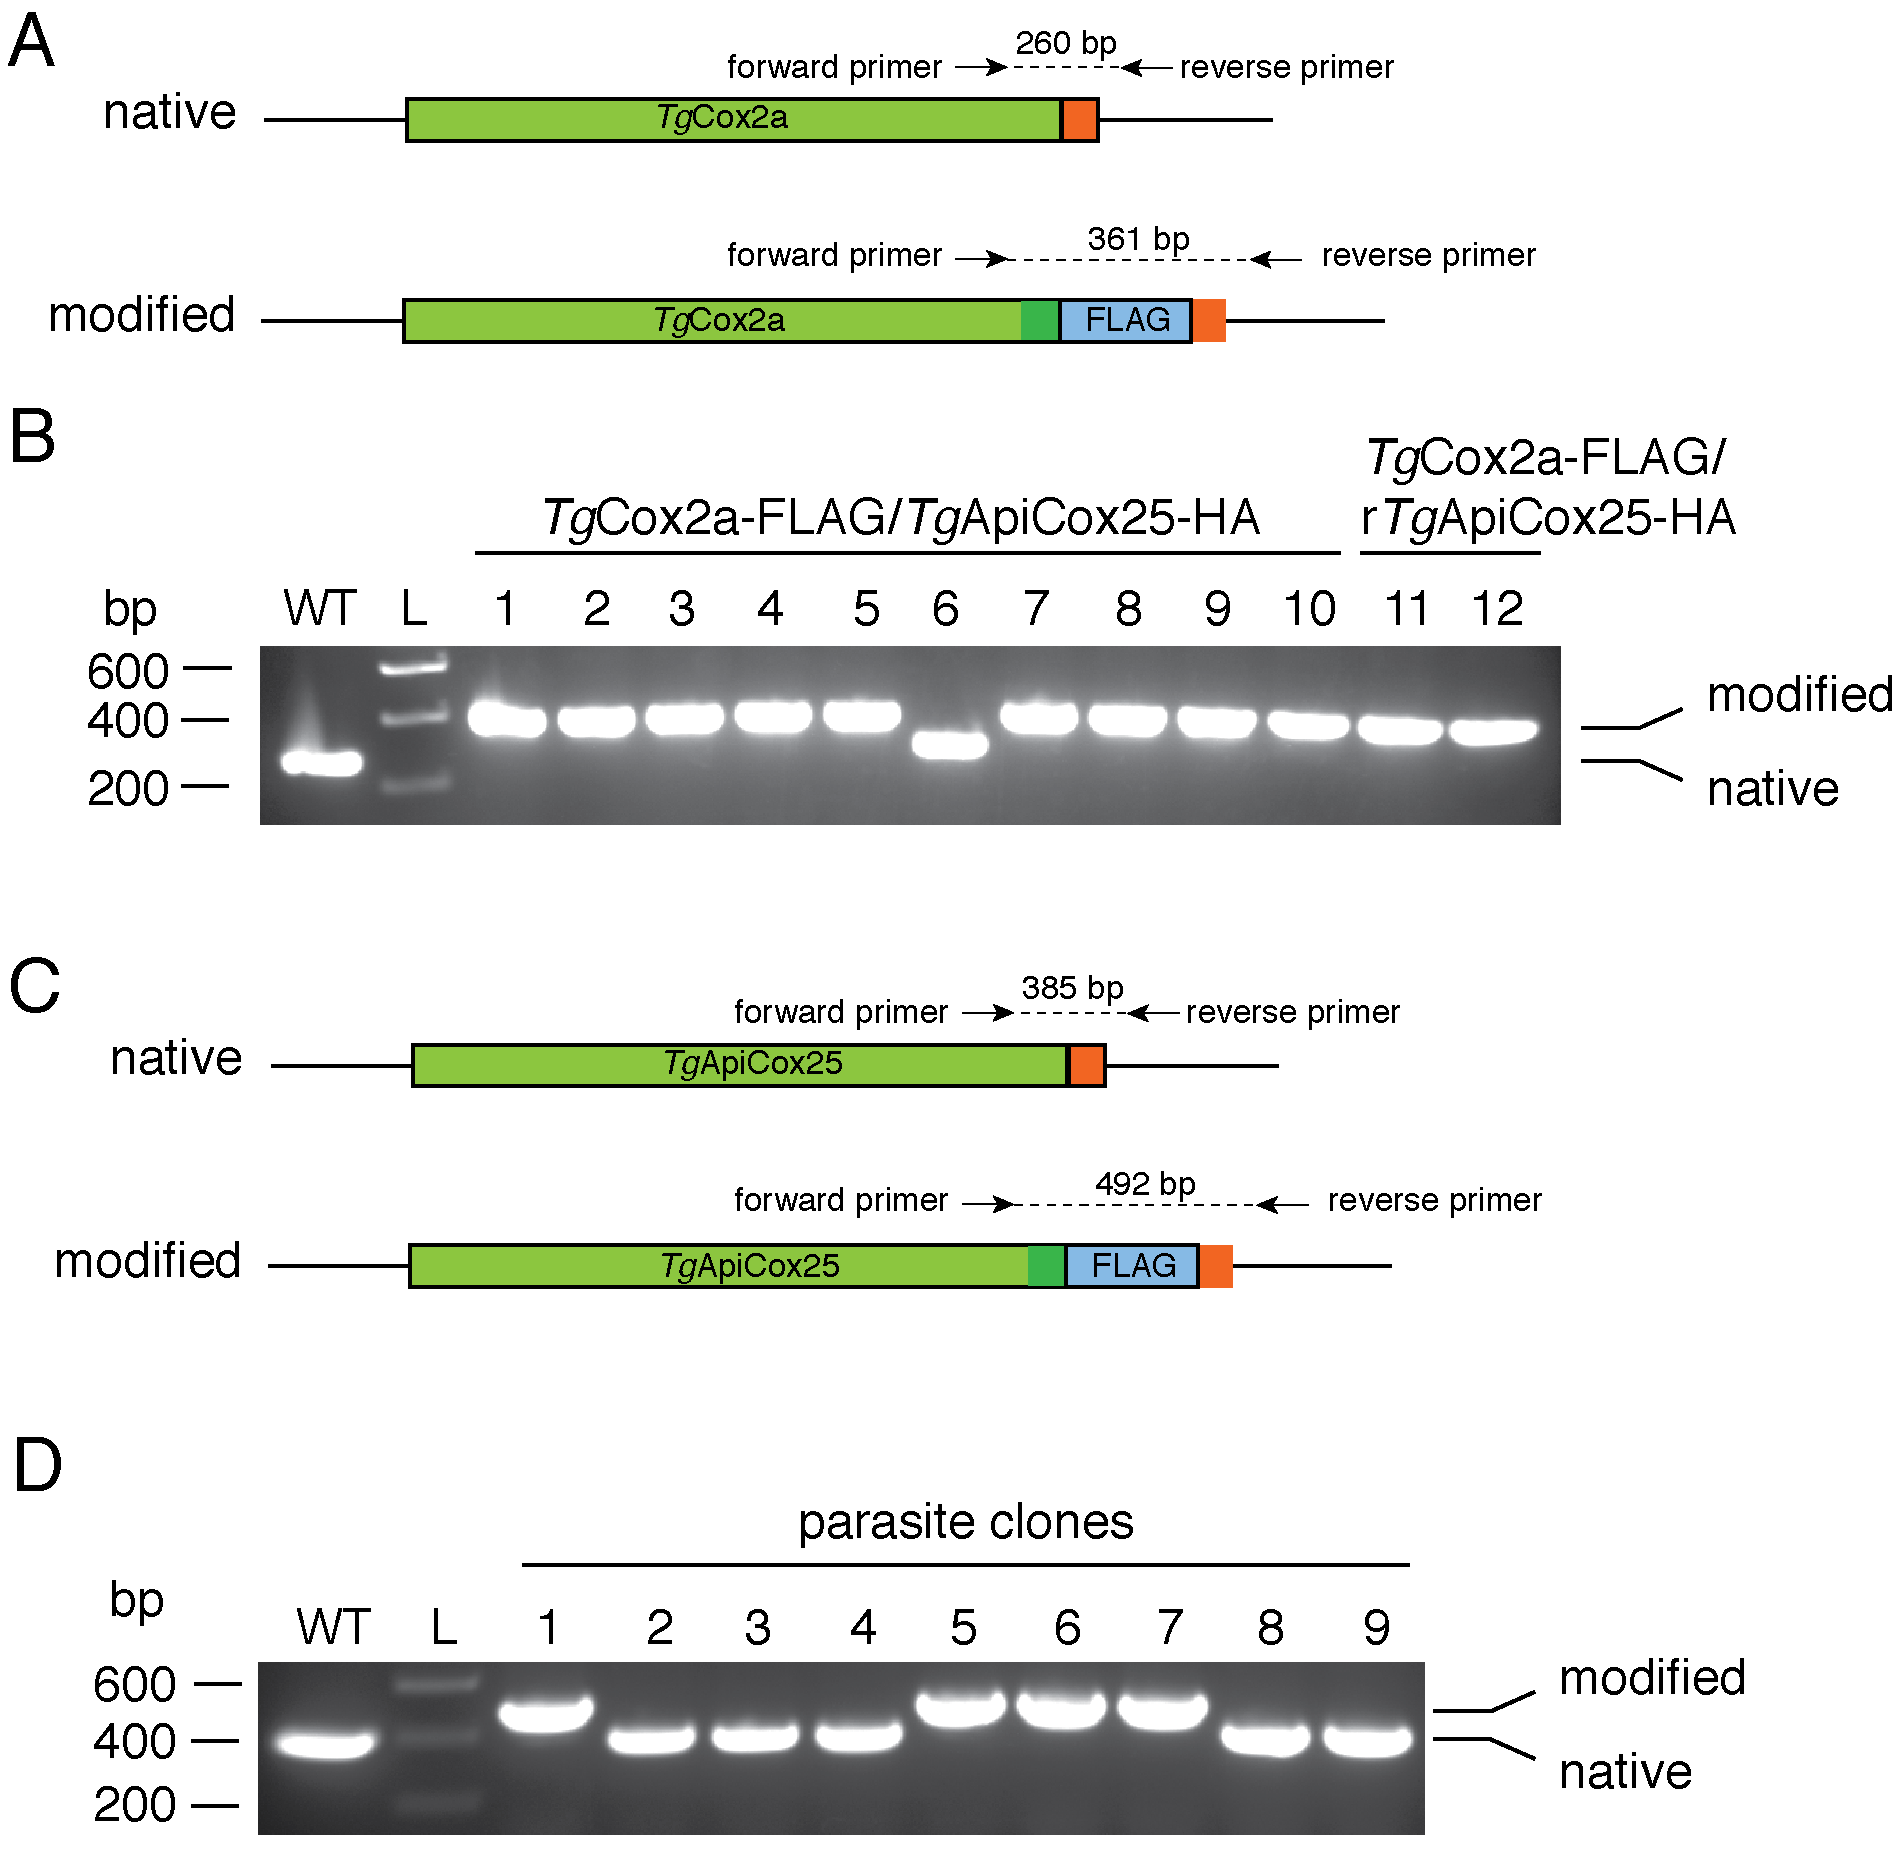

Supplement: supp [file elife-38131-supp-v1.zip › elife_poa_e38131_Figure_7_figure_supplement_1.tif]

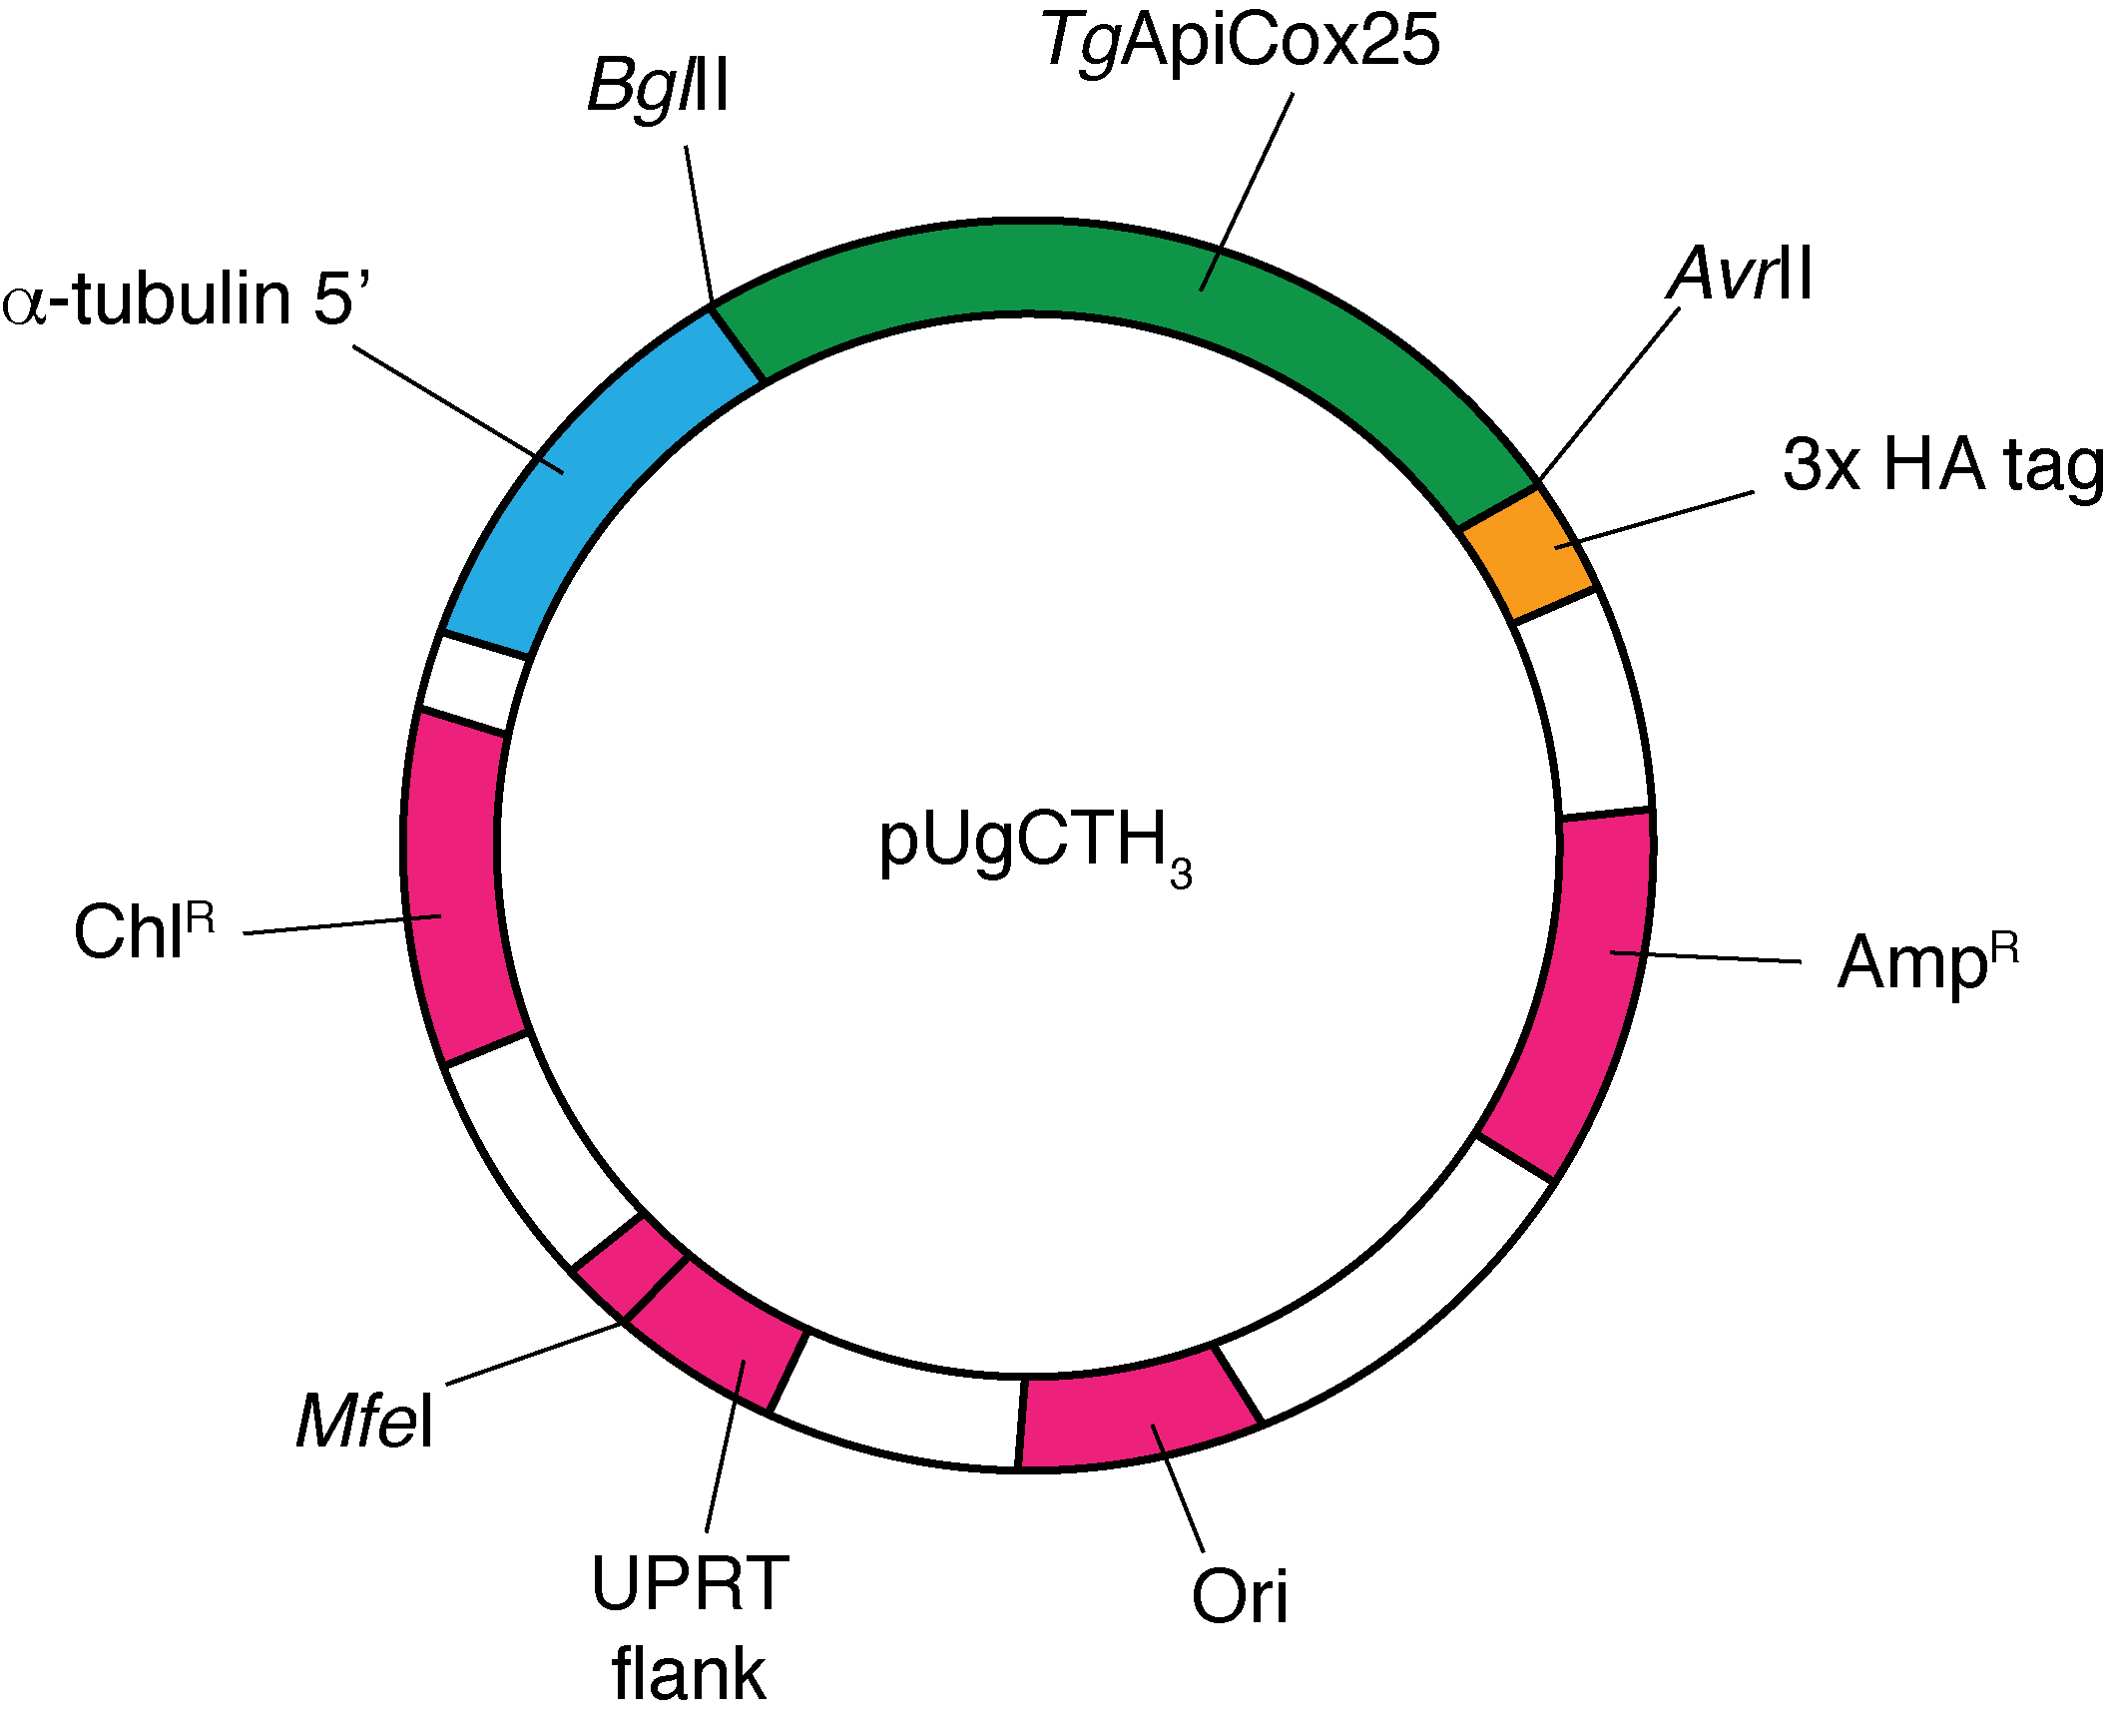

Supplement: supp [file elife-38131-supp-v1.zip › elife_poa_e38131_Figure_5_figure_supplement_4.tif]

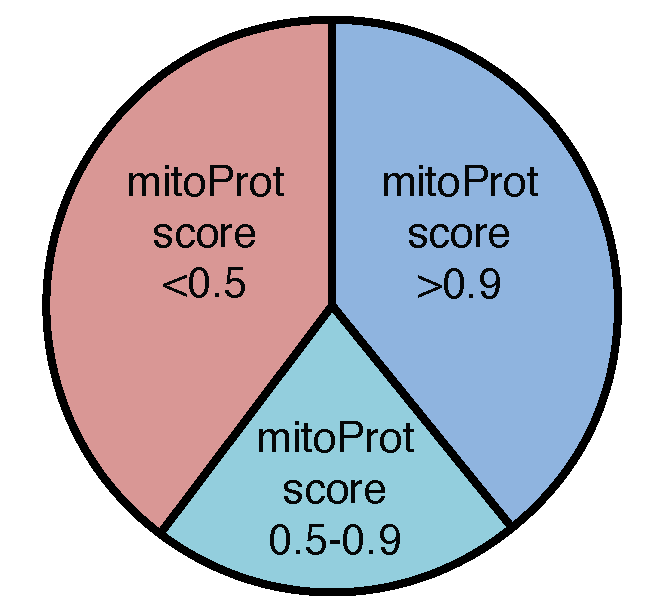

Supplement: supp [file elife-38131-supp-v1.zip › elife_poa_e38131_Figure_2_figure_supplement_1.tif]

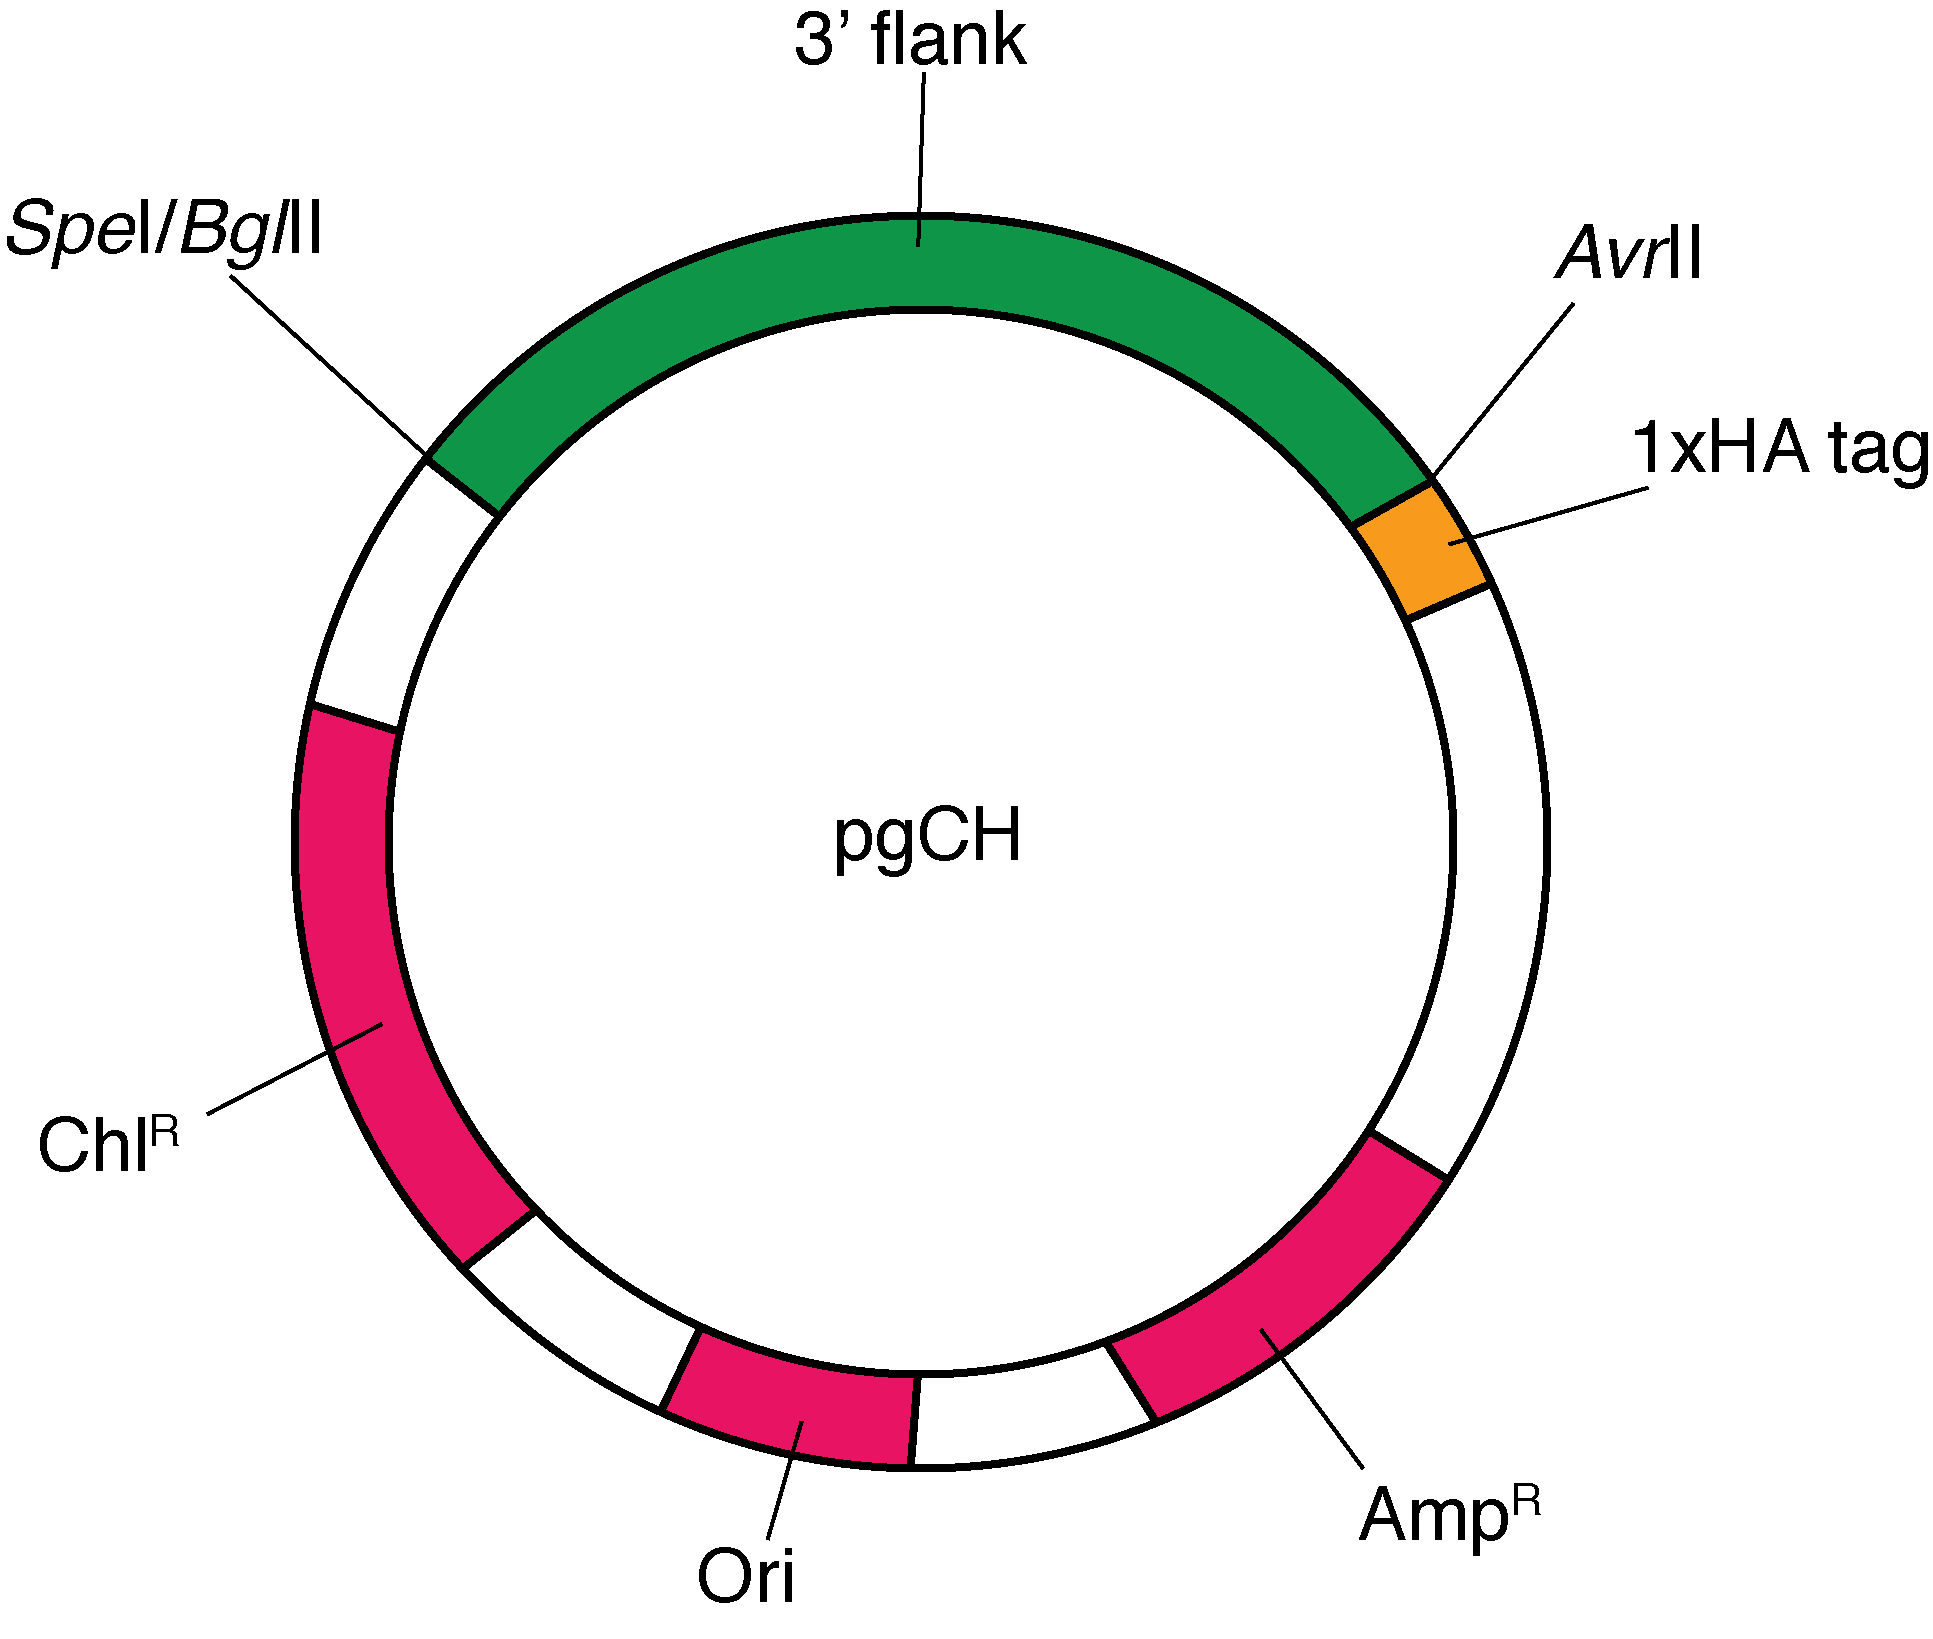

Supplement: supp [file elife-38131-supp-v1.zip › elife_poa_e38131_Figure_3_figure_supplement_1.tif]

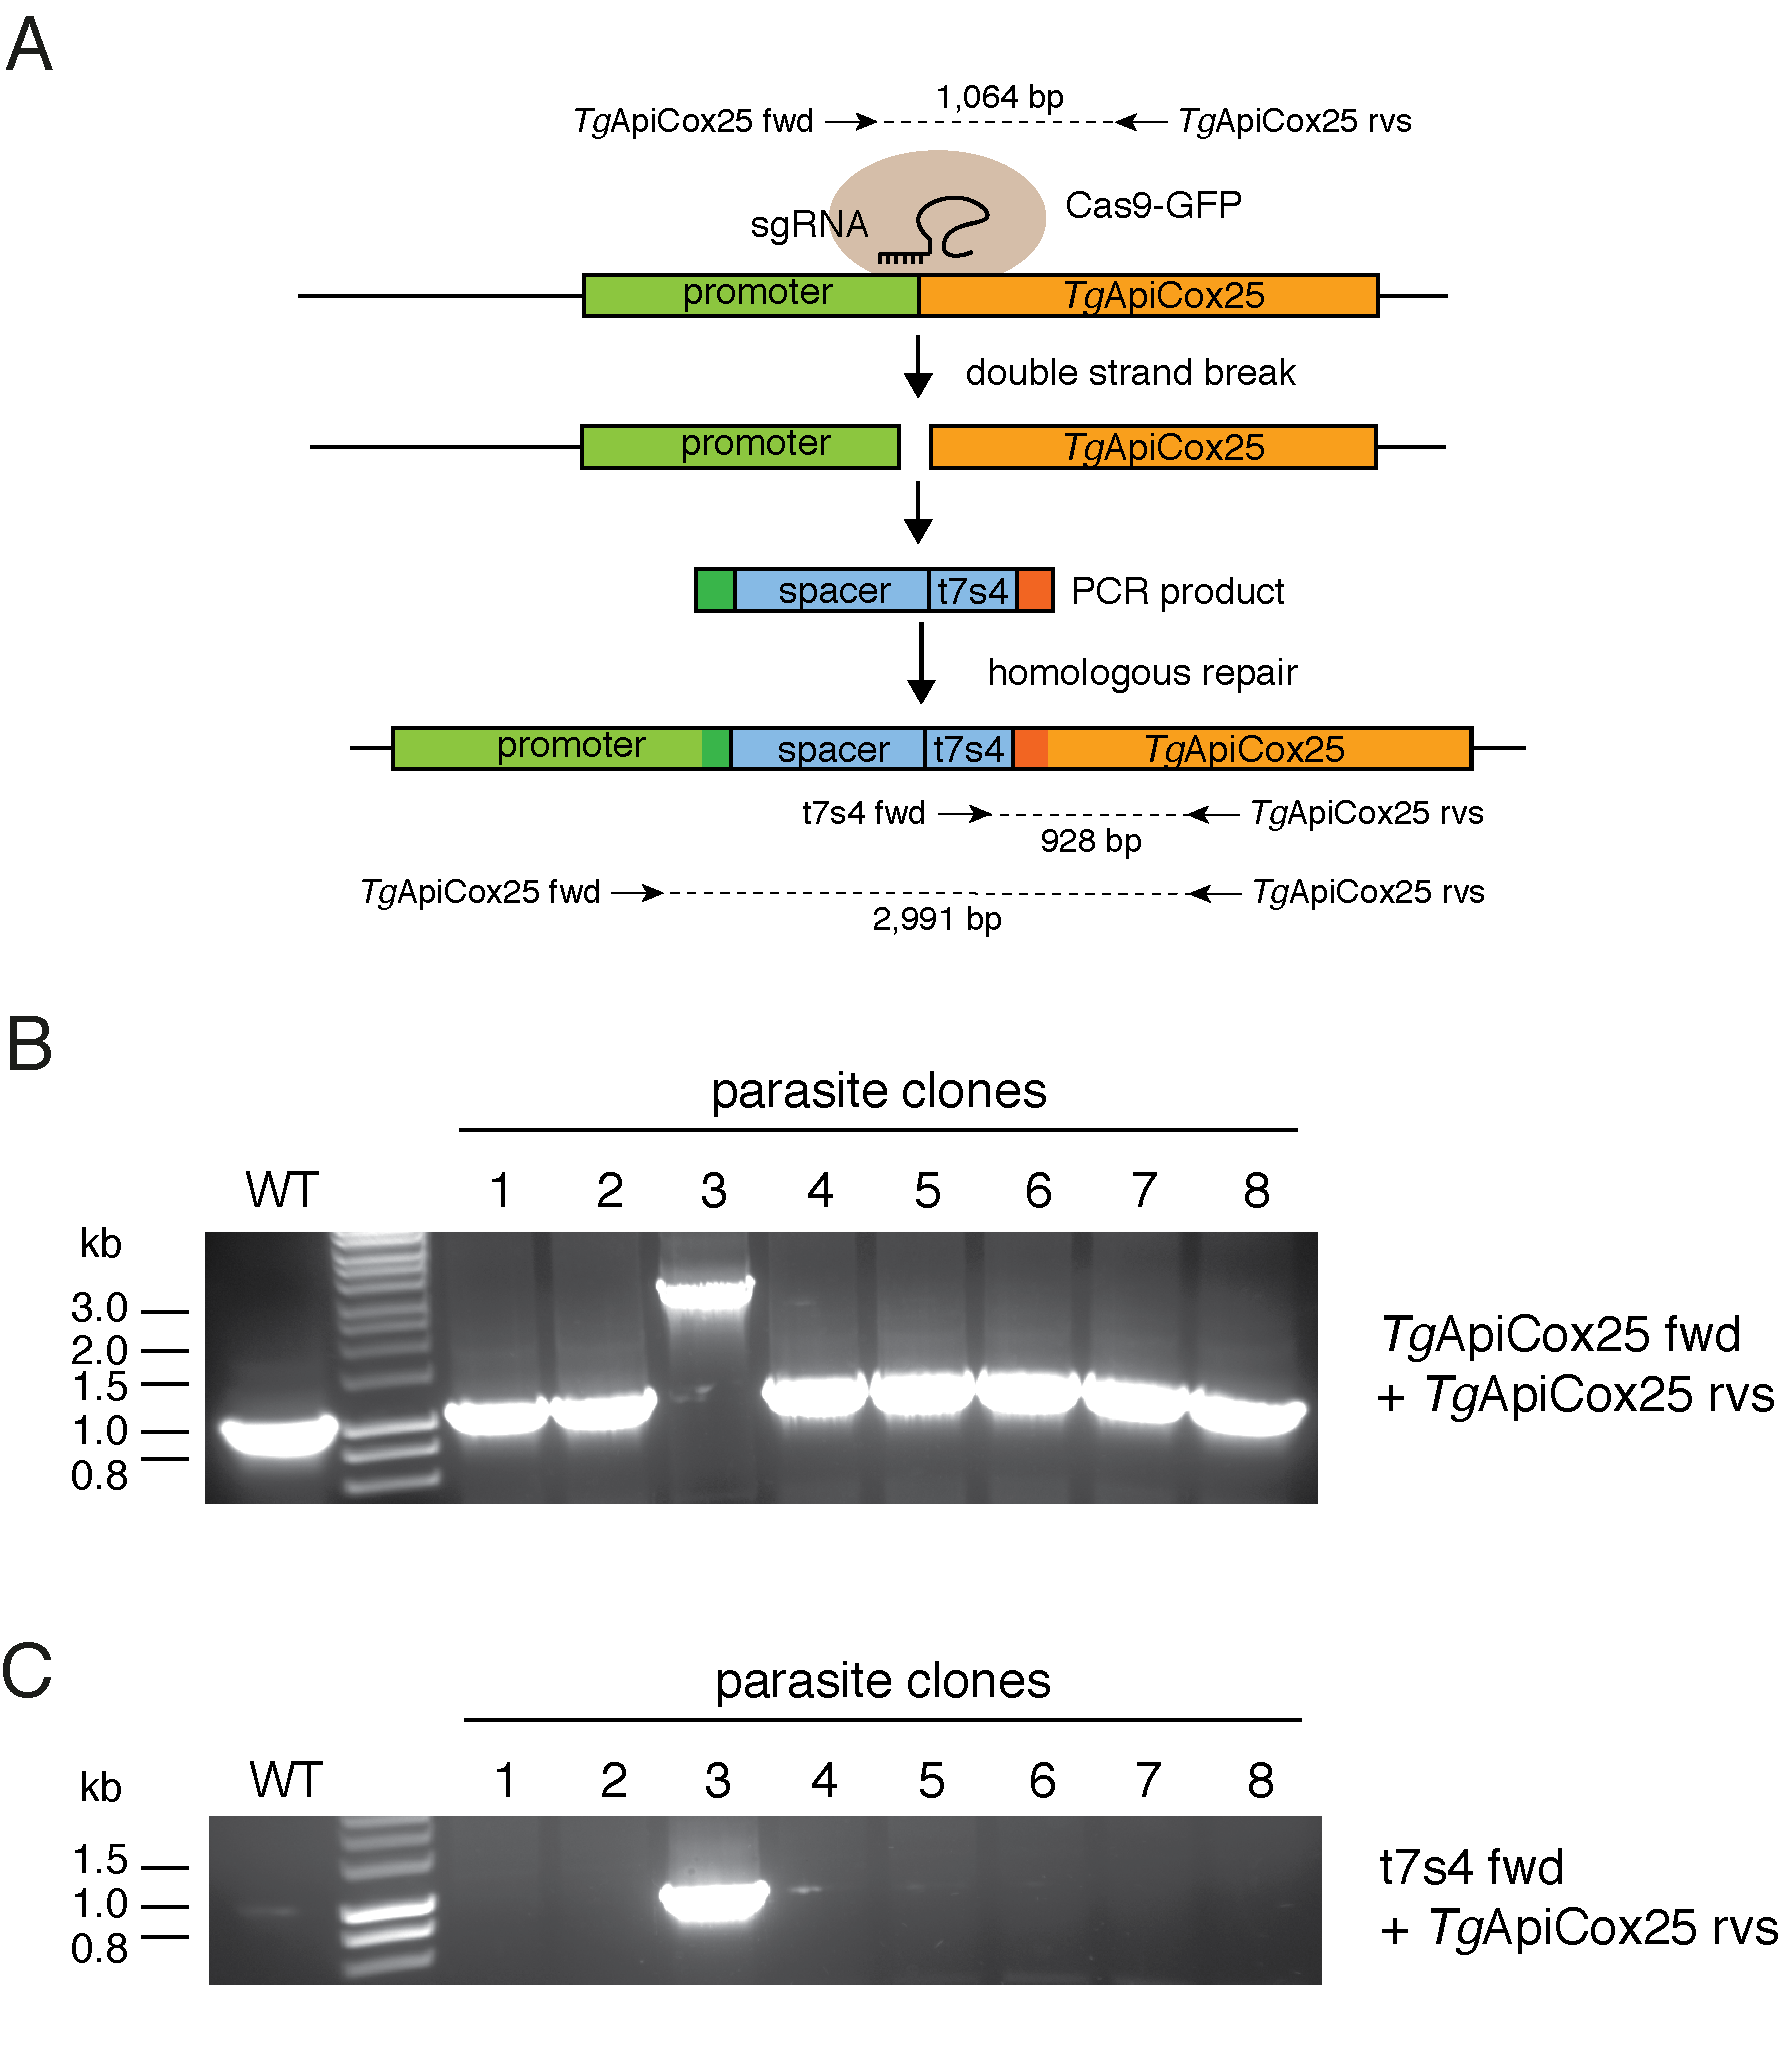

Supplement: supp [file elife-38131-supp-v1.zip › elife_poa_e38131_Figure_5_figure_supplement_1.tif]

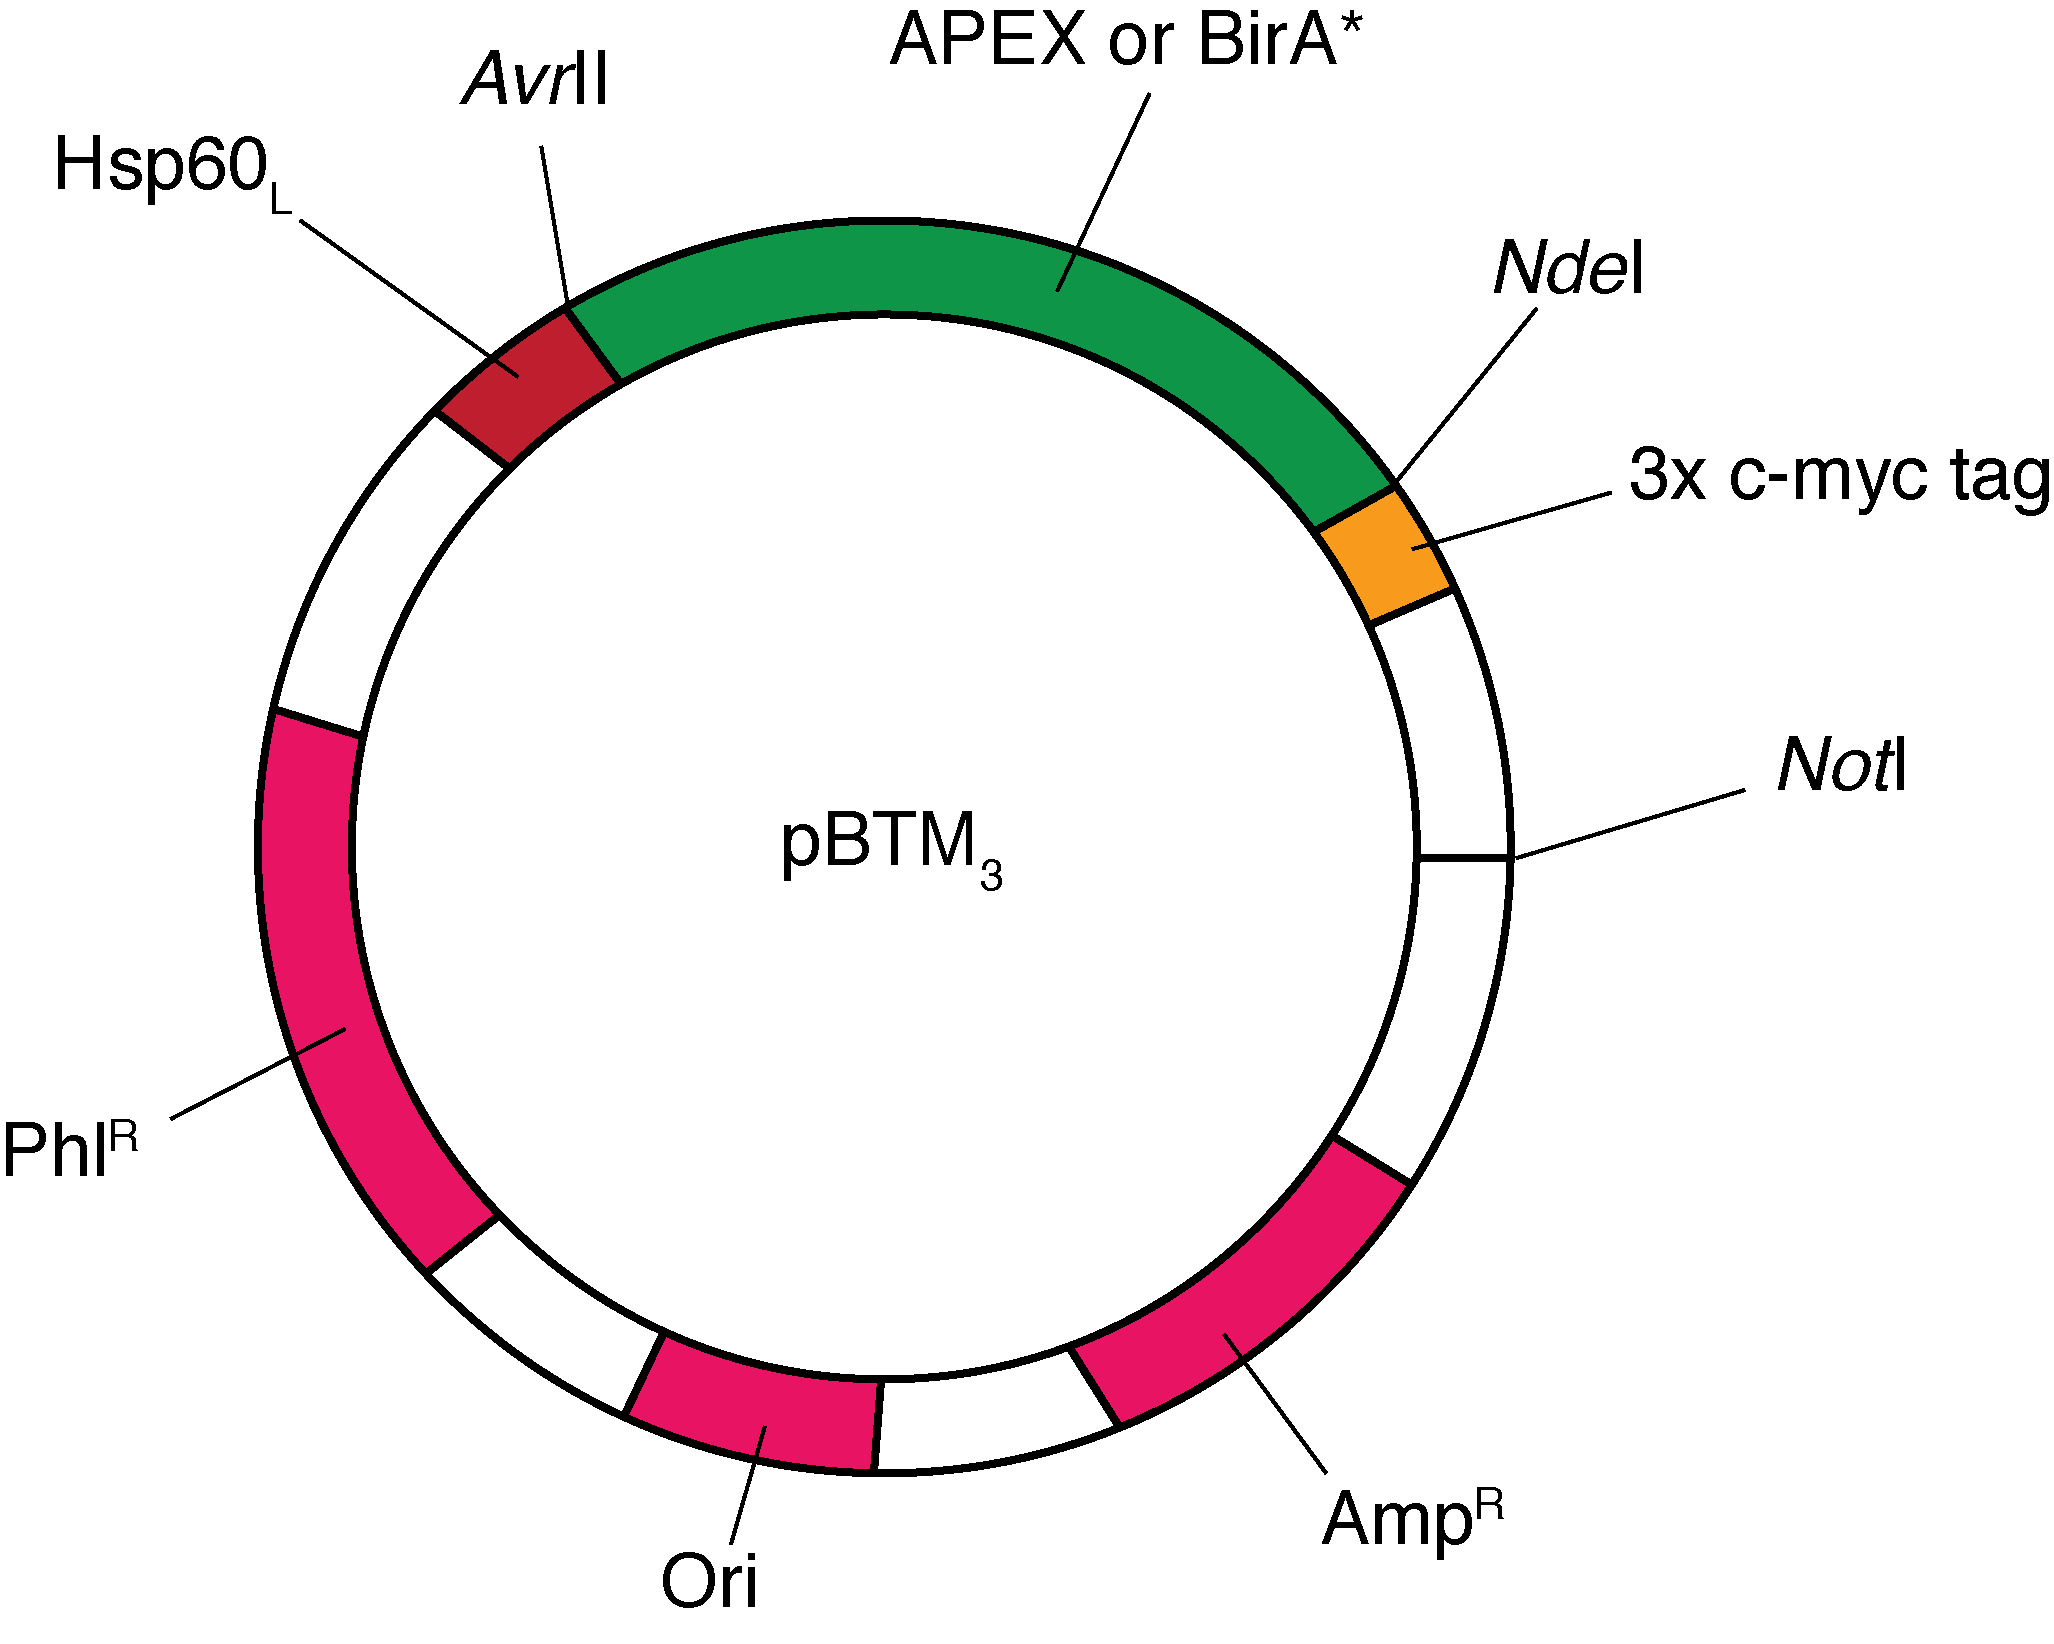

Supplement: supp [file elife-38131-supp-v1.zip › elife_poa_e38131_Figure_1_figure_supplement_1.tif]

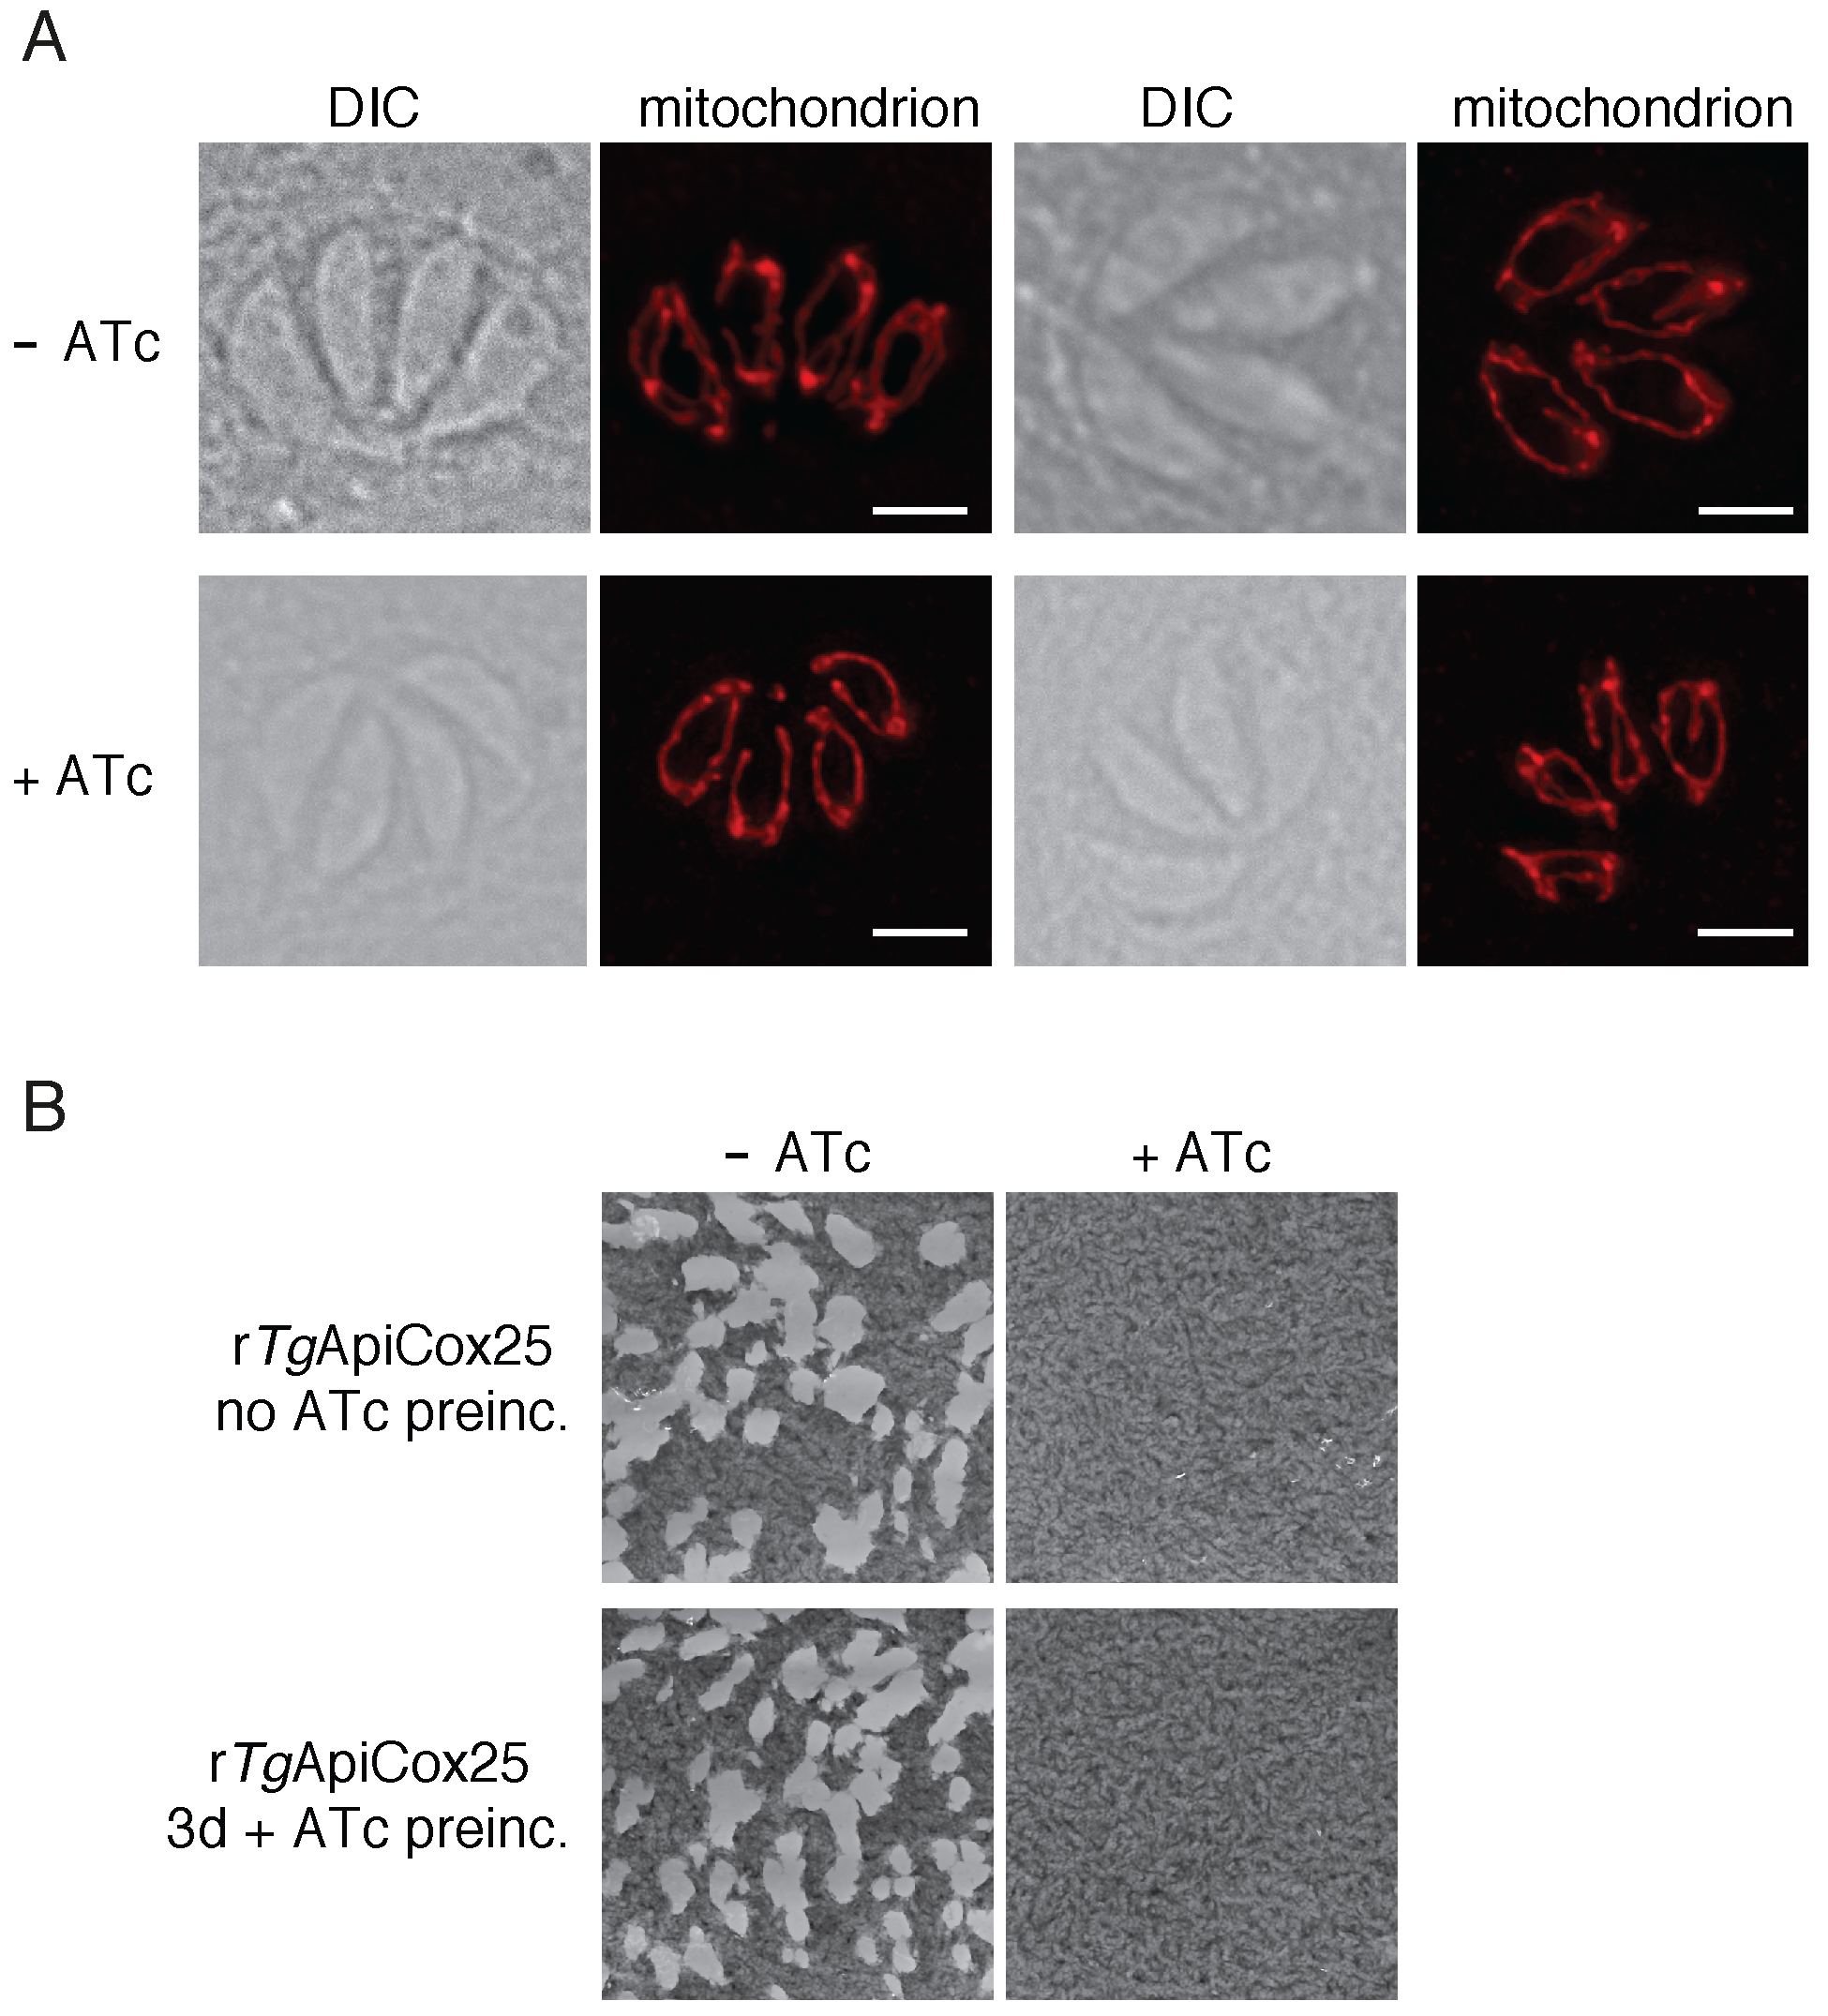

Supplement: supp [file elife-38131-supp-v1.zip › elife_poa_e38131_Figure_5_figure_supplement_3.tif]

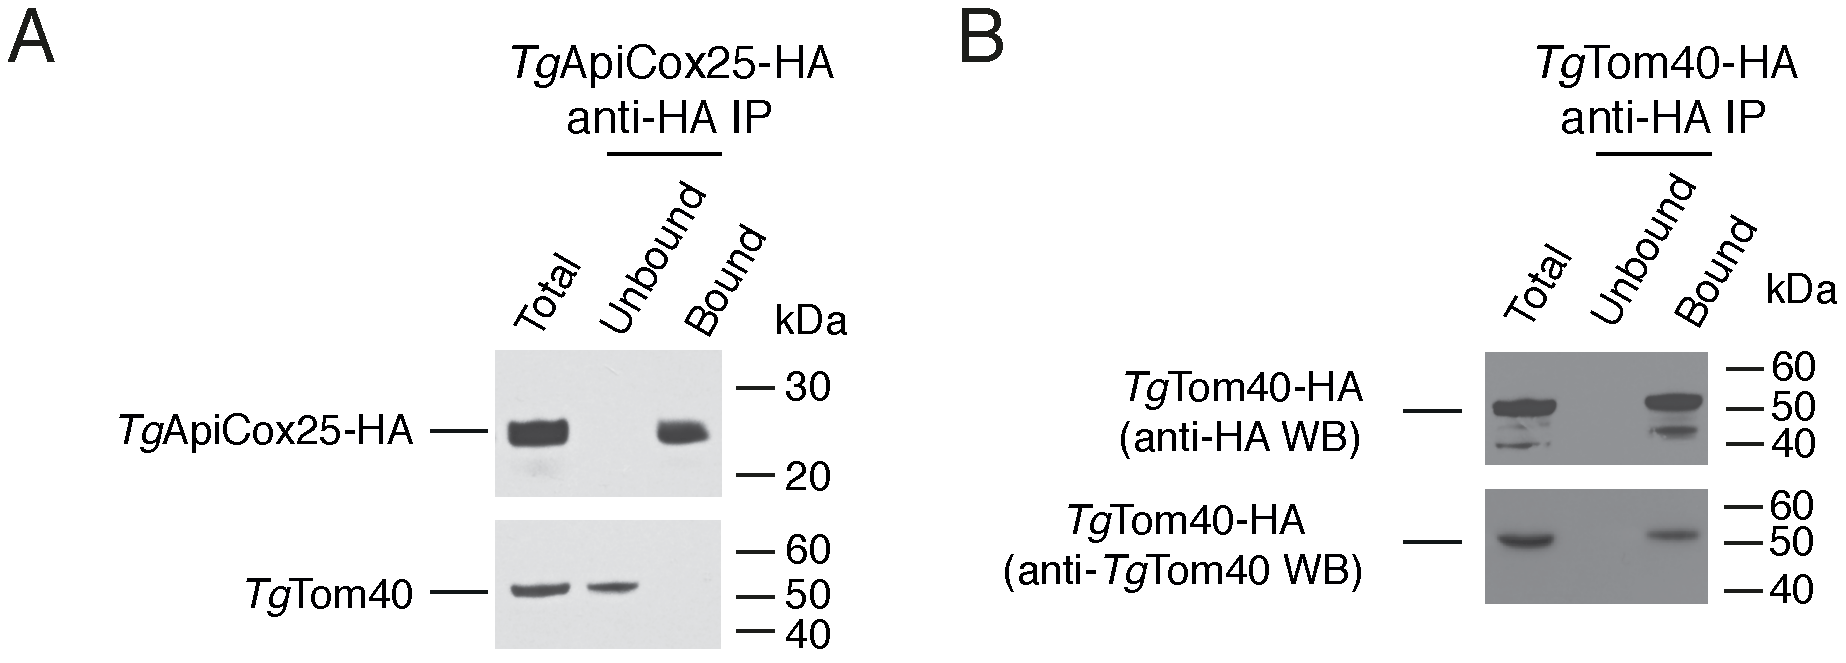

Supplement: supp [file elife-38131-supp-v1.zip › elife_poa_e38131_Figure_6_figure_supplement_1.tif]

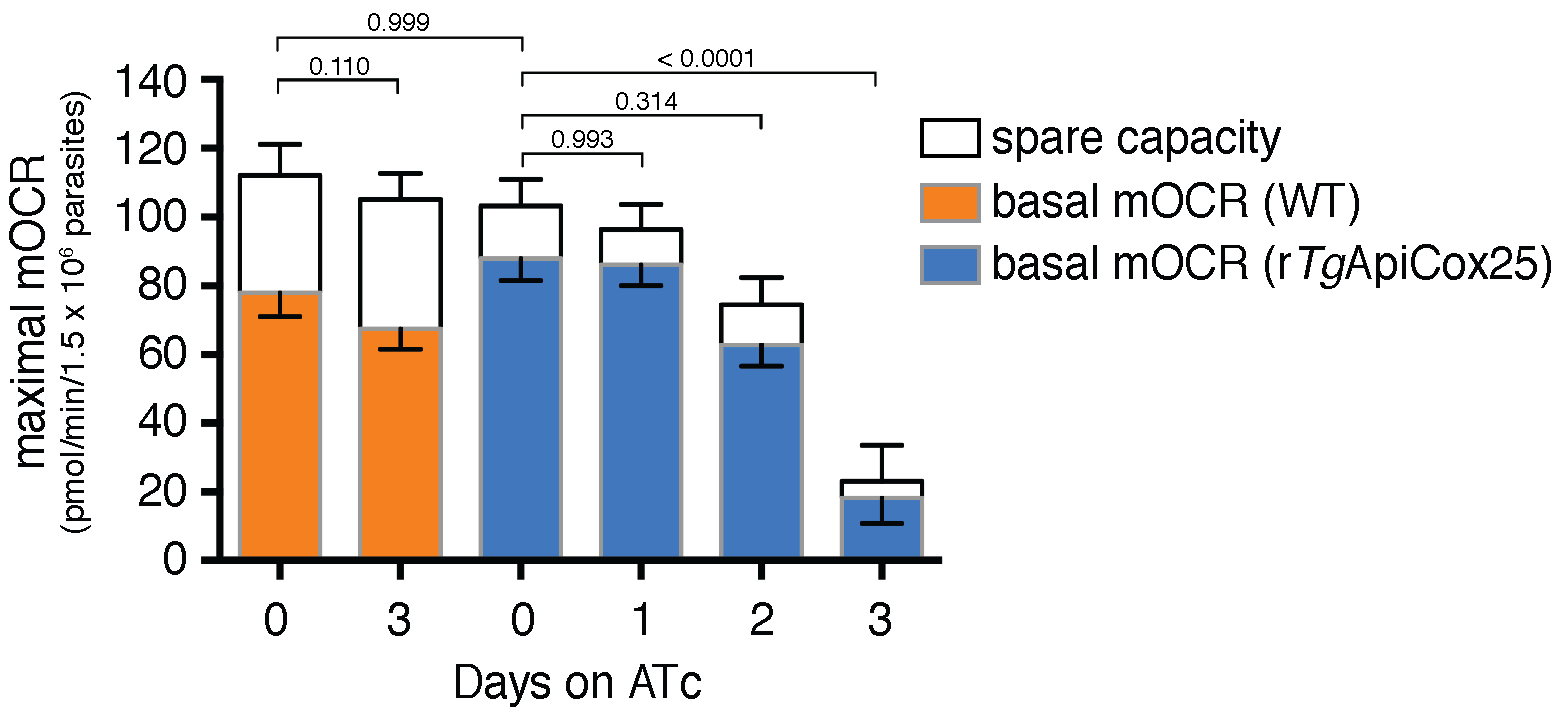

Supplement: supp [file elife-38131-supp-v1.zip › elife_poa_e38131_Figure_5_figure_supplement_2.tif]
